# Supplementary material
Source: Research Square preprint supplement (doi:10.21203/rs.3.rs-9688441/v1)
Supplement: Supplementary file 1 [file 77d05e8038b2c78d8757f4bb.xlsx]

## Sheet: Supplementary Table 1
Supplementary Table 1. Detailed information on 796 fungal species
No.	NCBI Taxnomy ID	Division	Class	Order	Species	Source	Number of Protein-coding genes	Number of GATA TFs
1	462254	Ascomycota	Dothideomycetes	Botryosphaeriales	Aplosporella prunicola CBS 121167	EnsemblFungi	12549	8
2	236234	Ascomycota	Dothideomycetes	Botryosphaeriales	Diplodia corticola str. CBS 112549	EnsemblFungi	10839	8
3	420778	Ascomycota	Dothideomycetes	Botryosphaeriales	Diplodia seriata	EnsemblFungi	9343	5
4	45133	Ascomycota	Dothideomycetes	Botryosphaeriales	Lasiodiplodia theobromae str. LA-SOL3	EnsemblFungi	12896	10
5	35725	Ascomycota	Dothideomycetes	Botryosphaeriales	Macrophomina phaseolina MS6	EnsemblFungi	13806	6
6	310453	Ascomycota	Dothideomycetes	Botryosphaeriales	Neofusicoccum parvum UCRNP2	EnsemblFungi	10366	2
7	46634	Ascomycota	Dothideomycetes	Dothideales	Aureobasidium melanogenum CBS 110374	EnsemblFungi	10584	7
8	559561	Ascomycota	Dothideomycetes	Dothideales	Aureobasidium namibiae CBS 147.97	EnsemblFungi	10259	8
9	5580	Ascomycota	Dothideomycetes	Dothideales	Aureobasidium pullulans	EnsemblFungi	10509	6
10	1042127	Ascomycota	Dothideomycetes	Dothideales	Aureobasidium subglaciale EXF-2481	EnsemblFungi	10792	8
11	574774	Ascomycota	Dothideomycetes	Gloniales	Glonium stellatum str. CBS 207.34	EnsemblFungi	14277	7
12	160035	Ascomycota	Dothideomycetes	incertae sedis	Zopfia rhizophila CBS 207.26	EnsemblFungi	21644	7
13	703497	Ascomycota	Dothideomycetes	Microthyriales	Microthyrium microscopicum str. CBS 115976	EnsemblFungi	12493	6
14	357750	Ascomycota	Dothideomycetes	Mycosphaerellales	Cercospora berteroae	EnsemblFungi	11903	5
15	122368	Ascomycota	Dothideomycetes	Mycosphaerellales	Cercospora beticola	EnsemblFungi	12468	6
16	135779	Ascomycota	Dothideomycetes	Mycosphaerellales	Cercospora zeae-maydis SCOH1-5	EnsemblFungi	12008	6
17	348901	Ascomycota	Dothideomycetes	Mycosphaerellales	Cercospora zeina str. CMW25467	EnsemblFungi	10193	5
18	64363	Ascomycota	Dothideomycetes	Mycosphaerellales	Dothistroma septosporum	EnsemblFungi	12415	6
19	321146	Ascomycota	Dothideomycetes	Mycosphaerellales	Pseudocercospora eumusae str. CBS 114824	EnsemblFungi	12632	5
20	1873960	Ascomycota	Dothideomycetes	Mycosphaerellales	Pseudocercospora fijiensis CIRAD86	EnsemblFungi	13066	6
21	113226	Ascomycota	Dothideomycetes	Mycosphaerellales	Pseudocercospora musae str. CBS 116634	EnsemblFungi	13129	6
22	112498	Ascomycota	Dothideomycetes	Mycosphaerellales	Ramularia collo-cygni	EnsemblFungi	11622	6
23	85929	Ascomycota	Dothideomycetes	Mycosphaerellales	Sphaerulina musiva SO2202	EnsemblFungi	10156	6
24	1709381	Ascomycota	Dothideomycetes	Mycosphaerellales	Baudoinia panamericana UAMH 10762	EnsemblFungi	10508	7
25	161662	Ascomycota	Dothideomycetes	Mycosphaerellales	Teratosphaeria nubilosa str. CBS 116005	EnsemblFungi	10998	6
26	2082308	Ascomycota	Dothideomycetes	Myriangiales	Sphaceloma murrayae str. CQ-2017a	EnsemblFungi	8256	6
27	741139	Ascomycota	Dothideomycetes	Mytilinidiales	Lepidopterella palustris CBS 459.81	EnsemblFungi	13861	6
28	390894	Ascomycota	Dothideomycetes	Mytilinidiales	Lophium mytilinum str. CBS 269.34	EnsemblFungi	15150	7
29	574789	Ascomycota	Dothideomycetes	Mytilinidiales	Mytilinidion resinicola str. CBS 304.34	EnsemblFungi	16792	6
30	548649	Ascomycota	Dothideomycetes	Pleosporales	Dothidotthia symphoricarpi CBS 119687	EnsemblFungi	11788	6
31	59586	Ascomycota	Dothideomycetes	Pleosporales	Corynespora cassiicola Philippines	EnsemblFungi	17158	6
32	706981	Ascomycota	Dothideomycetes	Pleosporales	Clathrospora elynae str. CBS 161.51	EnsemblFungi	13611	6
33	5454	Ascomycota	Dothideomycetes	Pleosporales	Ascochyta rabiei str. ArDII	EnsemblFungi	10596	6
34	100019	Ascomycota	Dothideomycetes	Pleosporales	Didymella exigua CBS 183.55	EnsemblFungi	12362	6
35	105696	Ascomycota	Dothideomycetes	Pleosporales	Epicoccum nigrum str. ICMP 19927	EnsemblFungi	12025	6
36	1460663	Ascomycota	Dothideomycetes	Pleosporales	Paraphaeosphaeria sporulosa str. AP3s5-JAC2a	EnsemblFungi	14734	6
37	690899	Ascomycota	Dothideomycetes	Pleosporales	Lentithecium fluviatile CBS 122367	EnsemblFungi	16713	6
38	5021	Ascomycota	Dothideomycetes	Pleosporales	Leptosphaeria maculans	EnsemblFungi	12469	5
39	372055	Ascomycota	Dothideomycetes	Pleosporales	Lophiostoma macrostomum CBS 122681	EnsemblFungi	16140	6
40	690887	Ascomycota	Dothideomycetes	Pleosporales	Lophiotrema nucula str. CBS 627.86	EnsemblFungi	18116	6
41	147558	Ascomycota	Dothideomycetes	Pleosporales	Byssothecium circinans str. CBS 675.92	EnsemblFungi	15784	6
42	45293	Ascomycota	Dothideomycetes	Pleosporales	Massarina eburnea CBS 473.64	EnsemblFungi	12935	6
43	147497	Ascomycota	Dothideomycetes	Pleosporales	Bimuria novae-zelandiae CBS 107.79	EnsemblFungi	16675	6
44	390896	Ascomycota	Dothideomycetes	Pleosporales	Trematosphaeria pertusa str. CBS 122368	EnsemblFungi	17304	6
45	50730	Ascomycota	Dothideomycetes	Pleosporales	Ampelomyces quisqualis str. HMLAC05119	EnsemblFungi	11147	5
46	1469910	Ascomycota	Dothideomycetes	Pleosporales	Ophiobolus disseminans str. CBS 113818	EnsemblFungi	16026	7
47	55067	Ascomycota	Dothideomycetes	Pleosporales	Phaeosphaeria nodorum	EnsemblFungi	12391	5
48	1904476	Ascomycota	Dothideomycetes	Pleosporales	Stagonospora sp. SRC1lsM3a	EnsemblFungi	14425	5
49	100044	Ascomycota	Dothideomycetes	Pleosporales	Pleomassaria siparia CBS 279.74	EnsemblFungi	13455	6
50	187734	Ascomycota	Dothideomycetes	Pleosporales	Alternaria alternata	EnsemblFungi	13640	6
51	156630	Ascomycota	Dothideomycetes	Pleosporales	Alternaria arborescens	EnsemblFungi	12801	6
52	3373883	Ascomycota	Dothideomycetes	Pleosporales	Alternaria sp. MG1	EnsemblFungi	13440	7
53	119927	Ascomycota	Dothideomycetes	Pleosporales	Alternaria tenuissima	EnsemblFungi	12792	6
54	5016	Ascomycota	Dothideomycetes	Pleosporales	Bipolaris maydis ATCC 48331	EnsemblFungi	12705	7
55	101162	Ascomycota	Dothideomycetes	Pleosporales	Bipolaris oryzae ATCC 44560	EnsemblFungi	12002	6
56	45130	Ascomycota	Dothideomycetes	Pleosporales	Bipolaris sorokiniana ND90Pr	EnsemblFungi	12214	7
57	5017	Ascomycota	Dothideomycetes	Pleosporales	Bipolaris zeicola 26-R-13	EnsemblFungi	12853	6
58	184978	Ascomycota	Dothideomycetes	Pleosporales	Decorospora gaudefroyi str. P77	EnsemblFungi	11835	6
59	671987	Ascomycota	Dothideomycetes	Pleosporales	Exserohilum turcica Et28A	EnsemblFungi	11698	5
60	91370	Ascomycota	Dothideomycetes	Pleosporales	Pyrenophora seminiperda CCB06	EnsemblFungi	8711	4
61	53485	Ascomycota	Dothideomycetes	Pleosporales	Pyrenophora teres	EnsemblFungi	11799	6
62	45151	Ascomycota	Dothideomycetes	Pleosporales	Pyrenophora tritici-repentis	EnsemblFungi	11072	5
63	183478	Ascomycota	Dothideomycetes	Pleosporales	Stemphylium lycopersici str. CIDEFI 212	EnsemblFungi	9024	6
64	718229	Ascomycota	Dothideomycetes	Pleosporales	Sporormia fimetaria CBS 119925	EnsemblFungi	10775	6
65	318751	Ascomycota	Dothideomycetes	Pleosporales	Westerdykella ornata str. CBS 379.55	EnsemblFungi	10410	6
66	1048519	Ascomycota	Dothideomycetes	Trypetheliales	Viridothelium virens str. Tuck. ex Michener	EnsemblFungi	11847	6
67	43229	Ascomycota	Eurotiomycetes	Chaetothyriales	Capronia coronata CBS 617.96	EnsemblFungi	9231	7
68	43228	Ascomycota	Eurotiomycetes	Chaetothyriales	Capronia epimyces CBS 606.96	EnsemblFungi	10469	6
69	89940	Ascomycota	Eurotiomycetes	Chaetothyriales	Cladophialophora bantiana CBS 173.52	EnsemblFungi	12762	6
70	86049	Ascomycota	Eurotiomycetes	Chaetothyriales	Cladophialophora carrionii CBS 160.54	EnsemblFungi	10373	6
71	569365	Ascomycota	Eurotiomycetes	Chaetothyriales	Cladophialophora immunda str. CBS 83496	EnsemblFungi	14033	6
72	1182553	Ascomycota	Eurotiomycetes	Chaetothyriales	Cladophialophora psammophila CBS 110553	EnsemblFungi	13421	6
73	470704	Ascomycota	Eurotiomycetes	Chaetothyriales	Cladophialophora yegresii CBS 114405	EnsemblFungi	10118	6
74	1033840	Ascomycota	Eurotiomycetes	Chaetothyriales	Exophiala aquamarina CBS 119918	EnsemblFungi	13118	6
75	5970	Ascomycota	Eurotiomycetes	Chaetothyriales	Exophiala dermatitidis NIH/UT8656	EnsemblFungi	9578	6
76	212818	Ascomycota	Eurotiomycetes	Chaetothyriales	Exophiala mesophila	EnsemblFungi	10355	5
77	215243	Ascomycota	Eurotiomycetes	Chaetothyriales	Exophiala oligosperma str. CBS 72588	EnsemblFungi	13234	6
78	1016849	Ascomycota	Eurotiomycetes	Chaetothyriales	Exophiala sideris str. CBS 121828	EnsemblFungi	11120	6
79	91928	Ascomycota	Eurotiomycetes	Chaetothyriales	Exophiala spinifera str. CBS 89968	EnsemblFungi	12049	6
80	348802	Ascomycota	Eurotiomycetes	Chaetothyriales	Exophiala xenobiotica str. CBS 118157	EnsemblFungi	13187	6
81	1367422	Ascomycota	Eurotiomycetes	Chaetothyriales	Fonsecaea erecta	EnsemblFungi	12090	6
82	254056	Ascomycota	Eurotiomycetes	Chaetothyriales	Fonsecaea monophora	EnsemblFungi	11984	6
83	979981	Ascomycota	Eurotiomycetes	Chaetothyriales	Fonsecaea multimorphosa	EnsemblFungi	11804	6
84	856822	Ascomycota	Eurotiomycetes	Chaetothyriales	Fonsecaea nubica	EnsemblFungi	11681	6
85	40355	Ascomycota	Eurotiomycetes	Chaetothyriales	Fonsecaea pedrosoi CBS 271.37	EnsemblFungi	12527	6
86	5601	Ascomycota	Eurotiomycetes	Chaetothyriales	Phialophora americana str. CBS 27337	EnsemblFungi	11909	6
87	5600	Ascomycota	Eurotiomycetes	Chaetothyriales	Phialophora attinorum str. CBS 131958	EnsemblFungi	11848	7
88	86056	Ascomycota	Eurotiomycetes	Chaetothyriales	Rhinocladiella mackenziei CBS 650.93	EnsemblFungi	11382	6
89	487661	Ascomycota	Eurotiomycetes	Eurotiales	Aspergillus aculeatinus CBS 121060	EnsemblFungi	12028	6
90	5053	Ascomycota	Eurotiomycetes	Eurotiales	Aspergillus aculeatus ATCC 16872	EnsemblFungi	10843	6
91	209559	Ascomycota	Eurotiomycetes	Eurotiales	Aspergillus alliaceus str. CBS 536.65	EnsemblFungi	13098	6
92	656916	Ascomycota	Eurotiomycetes	Eurotiales	Aspergillus arachidicola str. CBS 117610	EnsemblFungi	12090	6
93	36643	Ascomycota	Eurotiomycetes	Eurotiales	Aspergillus avenaceus str. IBT 18842	EnsemblFungi	11292	6
94	105351	Ascomycota	Eurotiomycetes	Eurotiales	Aspergillus awamori str. IFM 58123	EnsemblFungi	11224	6
95	1226010	Ascomycota	Eurotiomycetes	Eurotiales	Aspergillus bertholletiae str. IBT 29228	EnsemblFungi	12947	6
96	109264	Ascomycota	Eurotiomycetes	Eurotiales	Aspergillus bombycis str. NRRL26010	EnsemblFungi	12265	6
97	319629	Ascomycota	Eurotiomycetes	Eurotiales	Aspergillus brasiliensis CBS 101740	EnsemblFungi	12990	6
98	1191711	Ascomycota	Eurotiomycetes	Eurotiales	Aspergillus brunneoviolaceus CBS 621.78	EnsemblFungi	12073	6
99	61420	Ascomycota	Eurotiomycetes	Eurotiales	Aspergillus caelatus str. CBS 763.97	EnsemblFungi	13914	5
100	454130	Ascomycota	Eurotiomycetes	Eurotiales	Aspergillus calidoustus str. SF006504	EnsemblFungi	15384	6
101	41068	Ascomycota	Eurotiomycetes	Eurotiales	Aspergillus campestris IBT 28561	EnsemblFungi	9756	6
102	41067	Ascomycota	Eurotiomycetes	Eurotiales	Aspergillus candidus str. CBS 102.13	EnsemblFungi	9639	6
103	40993	Ascomycota	Eurotiomycetes	Eurotiales	Aspergillus carbonarius ITEM 5010	EnsemblFungi	11478	6
104	5057	Ascomycota	Eurotiomycetes	Eurotiales	Aspergillus clavatus NRRL 1	EnsemblFungi	9121	6
105	138285	Ascomycota	Eurotiomycetes	Eurotiales	Aspergillus coremiiformis str. CBS 553.77	EnsemblFungi	9078	6
106	1448317	Ascomycota	Eurotiomycetes	Eurotiales	Aspergillus costaricaensis CBS 115574	EnsemblFungi	11966	6
107	573508	Ascomycota	Eurotiomycetes	Eurotiales	Aspergillus cristatus str. GZAAS20.1005	EnsemblFungi	10344	6
108	41066	Ascomycota	Eurotiomycetes	Eurotiales	Aspergillus ellipticus CBS 707.79	EnsemblFungi	12882	7
109	1340029	Ascomycota	Eurotiomycetes	Eurotiales	Aspergillus eucalypticola CBS 122712	EnsemblFungi	11933	6
110	1191702	Ascomycota	Eurotiomycetes	Eurotiales	Aspergillus fijiensis CBS 313.89	EnsemblFungi	12018	6
111	36630	Ascomycota	Eurotiomycetes	Eurotiales	Aspergillus fischeri NRRL 181 - GCA_000149645.4	EnsemblFungi	10390	6
112	5059	Ascomycota	Eurotiomycetes	Eurotiales	Aspergillus flavus	EnsemblFungi	12634	6
113	746128	Ascomycota	Eurotiomycetes	Eurotiales	Aspergillus fumigatus	EnsemblFungi	9549	6
114	41413	Ascomycota	Eurotiomycetes	Eurotiales	Aspergillus glaucus CBS 516.65	EnsemblFungi	11255	6
115	51019	Ascomycota	Eurotiomycetes	Eurotiales	Aspergillus heteromorphus CBS 117.55	EnsemblFungi	11130	7
116	319626	Ascomycota	Eurotiomycetes	Eurotiales	Aspergillus homomorphus CBS 101889	EnsemblFungi	11361	6
117	301854	Ascomycota	Eurotiomycetes	Eurotiales	Aspergillus ibericus CBS 121593	EnsemblFungi	11680	6
118	1232676	Ascomycota	Eurotiomycetes	Eurotiales	Aspergillus indologenus CBS 114.80	EnsemblFungi	12161	6
119	34381	Ascomycota	Eurotiomycetes	Eurotiales	Aspergillus japonicus CBS 114.51	EnsemblFungi	12022	6
120	293939	Ascomycota	Eurotiomycetes	Eurotiales	Aspergillus lentulus	EnsemblFungi	11286	6
121	41062	Ascomycota	Eurotiomycetes	Eurotiales	Aspergillus leporis str. CBS 151.66	EnsemblFungi	12743	6
122	1069201	Ascomycota	Eurotiomycetes	Eurotiales	Aspergillus luchuensis CBS 106.47	EnsemblFungi	13503	7
123	656917	Ascomycota	Eurotiomycetes	Eurotiales	Aspergillus minisclerotigenes str. CBS 117635	EnsemblFungi	13415	6
124	1810919	Ascomycota	Eurotiomycetes	Eurotiales	Aspergillus mulundensis str. DSM 5745	EnsemblFungi	11603	6
125	1196635	Ascomycota	Eurotiomycetes	Eurotiales	Aspergillus neoniger CBS 115656	EnsemblFungi	11939	6
126	162425	Ascomycota	Eurotiomycetes	Eurotiales	Aspergillus nidulans	EnsemblFungi	10534	6
127	5061	Ascomycota	Eurotiomycetes	Eurotiales	Aspergillus niger	EnsemblFungi	10373	6
128	340412	Ascomycota	Eurotiomycetes	Eurotiales	Aspergillus novofumigatus IBT 16806	EnsemblFungi	11534	6
129	986946	Ascomycota	Eurotiomycetes	Eurotiales	Aspergillus novoparasiticus str. CBS 126849	EnsemblFungi	14182	6
130	138278	Ascomycota	Eurotiomycetes	Eurotiales	Aspergillus ochraceoroseus IBT 24754	EnsemblFungi	8917	6
131	5062	Ascomycota	Eurotiomycetes	Eurotiales	Aspergillus oryzae 100-8	EnsemblFungi	11187	6
132	1490343	Ascomycota	Eurotiomycetes	Eurotiales	Aspergillus parasiticus SU-1	EnsemblFungi	8645	6
133	5063	Ascomycota	Eurotiomycetes	Eurotiales	Aspergillus phoenicis ATCC 13157	EnsemblFungi	11665	6
134	319630	Ascomycota	Eurotiomycetes	Eurotiales	Aspergillus piperis CBS 112811	EnsemblFungi	12071	6
135	1825620	Ascomycota	Eurotiomycetes	Eurotiales	Aspergillus pseudocaelatus str. CBS 117616	EnsemblFungi	13895	5
136	5052	Ascomycota	Eurotiomycetes	Eurotiales	Aspergillus pseudonomius str. CBS 119388	EnsemblFungi	13384	5
137	132259	Ascomycota	Eurotiomycetes	Eurotiales	Aspergillus pseudotamarii str. CBS 117625	EnsemblFungi	13428	6
138	308745	Ascomycota	Eurotiomycetes	Eurotiales	Aspergillus rambellii str. SRRC1468	EnsemblFungi	7761	6
139	396024	Ascomycota	Eurotiomycetes	Eurotiales	Aspergillus ruber CBS 135680	EnsemblFungi	10066	6
140	979771	Ascomycota	Eurotiomycetes	Eurotiales	Aspergillus saccharolyticus JOP 1030-1	EnsemblFungi	10064	6
141	2070753	Ascomycota	Eurotiomycetes	Eurotiales	Aspergillus sclerotialis str. CBS 366.77	EnsemblFungi	11307	4
142	487660	Ascomycota	Eurotiomycetes	Eurotiales	Aspergillus sclerotiicarbonarius CBS 121057	EnsemblFungi	12569	6
143	319627	Ascomycota	Eurotiomycetes	Eurotiales	Aspergillus sclerotioniger CBS 115572	EnsemblFungi	12338	6
144	1034303	Ascomycota	Eurotiomycetes	Eurotiales	Aspergillus sergii str. CBS 130017	EnsemblFungi	13713	6
145	2894562	Ascomycota	Eurotiomycetes	Eurotiales	Aspergillus sp. HF37	EnsemblFungi	8895	4
146	306088	Ascomycota	Eurotiomycetes	Eurotiales	Aspergillus steynii IBT 23096	EnsemblFungi	13197	6
147	75750	Ascomycota	Eurotiomycetes	Eurotiales	Aspergillus sydowii CBS 593.65	EnsemblFungi	13579	7
148	482145	Ascomycota	Eurotiomycetes	Eurotiales	Aspergillus taichungensis str. IBT 19404	EnsemblFungi	9689	6
149	41984	Ascomycota	Eurotiomycetes	Eurotiales	Aspergillus tamarii str. CBS 117626	EnsemblFungi	13331	6
150	1220188	Ascomycota	Eurotiomycetes	Eurotiales	Aspergillus tanneri str. NIH1004	EnsemblFungi	13557	5
151	33178	Ascomycota	Eurotiomycetes	Eurotiales	Aspergillus terreus NIH2624	EnsemblFungi	10401	5
152	41047	Ascomycota	Eurotiomycetes	Eurotiales	Aspergillus thermomutatus	EnsemblFungi	9702	6
153	1034304	Ascomycota	Eurotiomycetes	Eurotiales	Aspergillus transmontanensis str. CBS 130015	EnsemblFungi	14215	6
154	5068	Ascomycota	Eurotiomycetes	Eurotiales	Aspergillus tubingensis CBS 134.48	EnsemblFungi	12319	6
155	1245748	Ascomycota	Eurotiomycetes	Eurotiales	Aspergillus turcosus	EnsemblFungi	9174	6
156	91492	Ascomycota	Eurotiomycetes	Eurotiales	Aspergillus udagawae	EnsemblFungi	10489	5
157	446911	Ascomycota	Eurotiomycetes	Eurotiales	Aspergillus uvarum CBS 121591	EnsemblFungi	12014	6
158	288669	Ascomycota	Eurotiomycetes	Eurotiales	Aspergillus vadensis CBS 113365	EnsemblFungi	12132	8
159	46472	Ascomycota	Eurotiomycetes	Eurotiales	Aspergillus versicolor CBS 583.65	EnsemblFungi	13222	7
160	657443	Ascomycota	Eurotiomycetes	Eurotiales	Aspergillus violaceofuscus CBS 115571	EnsemblFungi	12080	6
161	1341132	Ascomycota	Eurotiomycetes	Eurotiales	Aspergillus welwitschiae str. CBS 139.54b	EnsemblFungi	13684	7
162	5066	Ascomycota	Eurotiomycetes	Eurotiales	Aspergillus wentii DTO 134E9	EnsemblFungi	12435	8
163	5098	Ascomycota	Eurotiomycetes	Eurotiales	Monascus purpureus	EnsemblFungi	8095	4
164	41063	Ascomycota	Eurotiomycetes	Eurotiales	Penicilliopsis zonata CBS 506.65	EnsemblFungi	9870	6
165	416450	Ascomycota	Eurotiomycetes	Eurotiales	Penicillium antarcticum	EnsemblFungi	11514	6
166	1835702	Ascomycota	Eurotiomycetes	Eurotiales	Penicillium arizonense	EnsemblFungi	12253	6
167	104259	Ascomycota	Eurotiomycetes	Eurotiales	Penicillium brasilianum str. MG11	EnsemblFungi	11943	7
168	5075	Ascomycota	Eurotiomycetes	Eurotiales	Penicillium camemberti FM 013	EnsemblFungi	14418	6
169	254878	Ascomycota	Eurotiomycetes	Eurotiales	Penicillium chrysogenum str. P2niaD18	EnsemblFungi	11198	6
170	36646	Ascomycota	Eurotiomycetes	Eurotiales	Penicillium coprophilum	EnsemblFungi	8999	6
171	69771	Ascomycota	Eurotiomycetes	Eurotiales	Penicillium decumbens	EnsemblFungi	7149	6
172	36651	Ascomycota	Eurotiomycetes	Eurotiales	Penicillium digitatum PHI26	EnsemblFungi	9133	6
173	27334	Ascomycota	Eurotiomycetes	Eurotiales	Penicillium expansum str. d1	EnsemblFungi	11023	6
174	254877	Ascomycota	Eurotiomycetes	Eurotiales	Penicillium flavigenum	EnsemblFungi	10994	6
175	48697	Ascomycota	Eurotiomycetes	Eurotiales	Penicillium freii	EnsemblFungi	11739	6
176	5078	Ascomycota	Eurotiomycetes	Eurotiales	Penicillium griseofulvum str. PG3	EnsemblFungi	9630	6
177	40296	Ascomycota	Eurotiomycetes	Eurotiales	Penicillium italicum str. PHI-1	EnsemblFungi	9996	6
178	60175	Ascomycota	Eurotiomycetes	Eurotiales	Penicillium nalgiovense	EnsemblFungi	11853	6
179	229535	Ascomycota	Eurotiomycetes	Eurotiales	Penicillium nordicum	EnsemblFungi	12959	6
180	69781	Ascomycota	Eurotiomycetes	Eurotiales	Penicillium oxalicum 114-2	EnsemblFungi	9979	6
181	60169	Ascomycota	Eurotiomycetes	Eurotiales	Penicillium polonicum	EnsemblFungi	10694	6
182	5082	Ascomycota	Eurotiomycetes	Eurotiales	Penicillium roqueforti FM164	EnsemblFungi	12319	6
183	1108849	Ascomycota	Eurotiomycetes	Eurotiales	Penicillium rubens Wisconsin 54-1255	EnsemblFungi	12557	6
184	60172	Ascomycota	Eurotiomycetes	Eurotiales	Penicillium solitum	EnsemblFungi	11889	6
185	5081	Ascomycota	Eurotiomycetes	Eurotiales	Penicillium sp. 'occitanis' str. CL100	EnsemblFungi	11231	6
186	303698	Ascomycota	Eurotiomycetes	Eurotiales	Penicillium steckii	EnsemblFungi	10362	6
187	1316194	Ascomycota	Eurotiomycetes	Eurotiales	Penicillium subrubescens str. CBS 132785	EnsemblFungi	14177	6
188	29845	Ascomycota	Eurotiomycetes	Eurotiales	Penicillium vulpinum	EnsemblFungi	10278	6
189	519963	Ascomycota	Eurotiomycetes	Eurotiales	Elaphomyces granulatus str. OSC145934	EnsemblFungi	7178	6
190	33202	Ascomycota	Eurotiomycetes	Eurotiales	Byssochlamys spectabilis str. CBS 101075	EnsemblFungi	9270	4
191	68825	Ascomycota	Eurotiomycetes	Eurotiales	Rasamsonia emersonii CBS 393.64	EnsemblFungi	9843	3
192	1196081	Ascomycota	Eurotiomycetes	Eurotiales	Talaromyces amestolkiae str. CIB	EnsemblFungi	10407	5
193	1441469	Ascomycota	Eurotiomycetes	Eurotiales	Talaromyces atroroseus str. IBT 11181	EnsemblFungi	9523	6
194	28573	Ascomycota	Eurotiomycetes	Eurotiales	Talaromyces islandicus	EnsemblFungi	9927	6
195	37727	Ascomycota	Eurotiomycetes	Eurotiales	Talaromyces marneffei	EnsemblFungi	10025	6
196	121627	Ascomycota	Eurotiomycetes	Eurotiales	Talaromyces rugulosus str. W13939	EnsemblFungi	11907	6
197	28564	Ascomycota	Eurotiomycetes	Eurotiales	Talaromyces stipitatus ATCC 10500	EnsemblFungi	13252	6
198	5039	Ascomycota	Eurotiomycetes	Onygenales	Blastomyces dermatitidis ATCC 18188	EnsemblFungi	11443	8
199	1681229	Ascomycota	Eurotiomycetes	Onygenales	Blastomyces gilchristii SLH14081	EnsemblFungi	11343	6
200	2060905	Ascomycota	Eurotiomycetes	Onygenales	Blastomyces parvus str. UAMH130	EnsemblFungi	8201	6
201	1658174	Ascomycota	Eurotiomycetes	Onygenales	Blastomyces percursus str. EI222	EnsemblFungi	10285	6
202	2060906	Ascomycota	Eurotiomycetes	Onygenales	Blastomyces silverae str. UAMH 139	EnsemblFungi	8562	4
203	1955774	Ascomycota	Eurotiomycetes	Onygenales	Emergomyces pasteurianus Ep9510 str. UAMH 9510	EnsemblFungi	8950	6
204	5037	Ascomycota	Eurotiomycetes	Onygenales	Histoplasma capsulatum	EnsemblFungi	11221	6
205	121759	Ascomycota	Eurotiomycetes	Onygenales	Paracoccidioides brasiliensis Pb03	EnsemblFungi	8427	6
206	1048829	Ascomycota	Eurotiomycetes	Onygenales	Paracoccidioides lutzii Pb01	EnsemblFungi	8826	6
207	221428	Ascomycota	Eurotiomycetes	Onygenales	Polytolypa hystricis UAMH7299	EnsemblFungi	9934	6
208	63405	Ascomycota	Eurotiomycetes	Onygenales	Microsporum canis CBS 113480	EnsemblFungi	8765	3
209	63402	Ascomycota	Eurotiomycetes	Onygenales	Nannizzia gypsea CBS 118893	EnsemblFungi	8921	4
210	63400	Ascomycota	Eurotiomycetes	Onygenales	Trichophyton benhamiae CBS 112371	EnsemblFungi	7980	2
211	63418	Ascomycota	Eurotiomycetes	Onygenales	Trichophyton equinum CBS 127.97	EnsemblFungi	8676	3
212	101480	Ascomycota	Eurotiomycetes	Onygenales	Trichophyton interdigitale H6	EnsemblFungi	8397	4
213	523103	Ascomycota	Eurotiomycetes	Onygenales	Trichophyton mentagrophytes str. TIMM 2789	EnsemblFungi	7860	4
214	5551	Ascomycota	Eurotiomycetes	Onygenales	Trichophyton rubrum CBS 100081	EnsemblFungi	10637	4
215	69891	Ascomycota	Eurotiomycetes	Onygenales	Trichophyton soudanense CBS 452.61	EnsemblFungi	10671	4
216	34387	Ascomycota	Eurotiomycetes	Onygenales	Trichophyton tonsurans CBS 112818	EnsemblFungi	8521	4
217	63417	Ascomycota	Eurotiomycetes	Onygenales	Trichophyton verrucosum HKI 0517	EnsemblFungi	8028	2
218	34388	Ascomycota	Eurotiomycetes	Onygenales	Trichophyton violaceum str. CMCC(F)T3l	EnsemblFungi	7037	4
219	5105	Ascomycota	Eurotiomycetes	Onygenales	Ascosphaera apis ARSEF 7405	EnsemblFungi	6442	4
220	5501	Ascomycota	Eurotiomycetes	Onygenales	Coccidioides immitis	EnsemblFungi	7815	4
221	199306	Ascomycota	Eurotiomycetes	Onygenales	Coccidioides posadasii RMSCC 3488	EnsemblFungi	9964	4
222	33188	Ascomycota	Eurotiomycetes	Onygenales	Uncinocarpus reesii 1704 str. UAMH 1704	EnsemblFungi	7760	3
223	158046	Ascomycota	Eurotiomycetes	Phaeomoniellales	Phaeomoniella chlamydospora	EnsemblFungi	6907	3
224	364733	Ascomycota	Eurotiomycetes	Verrucariales	Endocarpon pusillum Z07020	EnsemblFungi	9238	6
225	5606	Ascomycota	incertae sedis	incertae sedis	Saitoella complicata NRRL Y-17804	EnsemblFungi	7119	8
226	136370	Ascomycota	Lecanoromycetes	Umbilicariales	Lasallia pustulata	EnsemblFungi	9825	6
227	34373	Ascomycota	Leotiomycetes	Erysiphales	Blumeria graminis	EnsemblFungi	7118	6
228	52586	Ascomycota	Leotiomycetes	Erysiphales	Erysiphe necator	EnsemblFungi	6484	5
229	225359	Ascomycota	Leotiomycetes	Erysiphales	Erysiphe pulchra	EnsemblFungi	6859	5
230	62708	Ascomycota	Leotiomycetes	Erysiphales	Golovinomyces cichoracearum	EnsemblFungi	6532	6
231	62714	Ascomycota	Leotiomycetes	Erysiphales	Golovinomyces magnicellulatus	EnsemblFungi	8172	7
232	324777	Ascomycota	Leotiomycetes	Helotiales	Marssonina brunnea f. sp. 'multigermtubi' MB_m1	EnsemblFungi	10027	6
233	324777	Ascomycota	Leotiomycetes	Helotiales	Marssonina coronariae str. NL1	EnsemblFungi	9355	5
234	946125	Ascomycota	Leotiomycetes	Helotiales	Diplocarpon rosae	EnsemblFungi	13761	10
235	2482752	Ascomycota	Leotiomycetes	Helotiales	Hyaloscypha bicolor E	EnsemblFungi	18617	8
236	2482757	Ascomycota	Leotiomycetes	Helotiales	Hyaloscypha variabilis F	EnsemblFungi	20386	6
237	1316785	Ascomycota	Leotiomycetes	Helotiales	Lachnellula arida str. CBS 203.66	EnsemblFungi	9594	6
238	1316786	Ascomycota	Leotiomycetes	Helotiales	Lachnellula cervina str. CBS 625.97	EnsemblFungi	9413	7
239	1316788	Ascomycota	Leotiomycetes	Helotiales	Lachnellula hyalina str. CBS 185.66	EnsemblFungi	9157	6
240	215460	Ascomycota	Leotiomycetes	Helotiales	Lachnellula occidentalis str. CBS 160.35	EnsemblFungi	8910	7
241	602034	Ascomycota	Leotiomycetes	Helotiales	Lachnellula subtilissima str. CBS 197.66	EnsemblFungi	8947	6
242	602035	Ascomycota	Leotiomycetes	Helotiales	Lachnellula suecica str. CBS 268.59	EnsemblFungi	10312	8
243	215461	Ascomycota	Leotiomycetes	Helotiales	Lachnellula willkommii str. CBS 172.35	EnsemblFungi	8978	6
244	150173	Ascomycota	Leotiomycetes	Helotiales	Phialocephala scopiformis str. CBS 120377	EnsemblFungi	18567	7
245	576137	Ascomycota	Leotiomycetes	Helotiales	Phialocephala subalpina	EnsemblFungi	20173	7
246	1755420	Ascomycota	Leotiomycetes	Helotiales	Cadophora sp. DSE1049	EnsemblFungi	22762	6
247	914238	Ascomycota	Leotiomycetes	Helotiales	Rhynchosporium agropyri	EnsemblFungi	13673	6
248	38037	Ascomycota	Leotiomycetes	Helotiales	Rhynchosporium commune	EnsemblFungi	12211	6
249	38038	Ascomycota	Leotiomycetes	Helotiales	Rhynchosporium secalis	EnsemblFungi	13145	6
250	2011926	Ascomycota	Leotiomycetes	Helotiales	Rutstroemia sp. NJR-2017a BBW	EnsemblFungi	10975	5
251	38488	Ascomycota	Leotiomycetes	Helotiales	Botryotinia calthae	EnsemblFungi	12263	5
252	54673	Ascomycota	Leotiomycetes	Helotiales	Botryotinia convoluta	EnsemblFungi	12417	6
253	278944	Ascomycota	Leotiomycetes	Helotiales	Botryotinia narcissicola	EnsemblFungi	12236	5
254	38448	Ascomycota	Leotiomycetes	Helotiales	Monilinia fructicola str. Mfrc123	EnsemblFungi	13749	6
255	38457	Ascomycota	Leotiomycetes	Helotiales	Monilinia fructigena str. Mfrg269	EnsemblFungi	10800	7
256	61186	Ascomycota	Leotiomycetes	Helotiales	Monilinia laxa str. Mlax316	EnsemblFungi	12424	7
257	77105	Ascomycota	Leotiomycetes	Helotiales	Sclerotinia borealis F-4128	EnsemblFungi	10166	6
258	5180	Ascomycota	Leotiomycetes	Helotiales	Sclerotinia sclerotiorum	EnsemblFungi	10175	3
259	186648	Ascomycota	Leotiomycetes	Helotiales	Pezoloma ericae str. UAMH 7357	EnsemblFungi	16783	7
260	78148	Ascomycota	Leotiomycetes	incertae sedis	Oidiodendron maius Zn	EnsemblFungi	16702	6
261	5539	Ascomycota	Leotiomycetes	incertae sedis	Scytalidium lignicola str. DSM 105466	EnsemblFungi	12795	6
262	29829	Ascomycota	Lipomycetes	Lipomycetales	Lipomyces starkeyi NRRL Y-11557	EnsemblFungi	8183	5
263	48691	Ascomycota	Neolectomycetes	Neolectales	Neolecta irregularis DAH-3	EnsemblFungi	5579	2
264	97331	Ascomycota	Orbiliomycetes	Orbiliales	Arthrobotrys flagrans str. CBS H-5679	EnsemblFungi	10346	6
265	13348	Ascomycota	Orbiliomycetes	Orbiliales	Arthrobotrys oligospora ATCC 24927	EnsemblFungi	11479	5
266	430498	Ascomycota	Orbiliomycetes	Orbiliales	Dactylellina haptotyla CBS 200.50	EnsemblFungi	10959	6
267	5191	Ascomycota	Pezizomycetes	Pezizales	Ascobolus immersus RN42	EnsemblFungi	17820	5
268	341454	Ascomycota	Pezizomycetes	Pezizales	Ascodesmis nigricans str. CBS 389.68	EnsemblFungi	9619	6
269	5194	Ascomycota	Pezizomycetes	Pezizales	Morchella conica CCBAS932	EnsemblFungi	11593	7
270	1250544	Ascomycota	Pezizomycetes	Pezizales	Sphaerosporella brunnea str. Sb_GMNB300	EnsemblFungi	12594	5
271	82571	Ascomycota	Pezizomycetes	Pezizales	Terfezia boudieri ATCC MYA-4762	EnsemblFungi	12110	6
272	44640	Ascomycota	Pezizomycetes	Pezizales	Choiromyces venosus 120613-1	EnsemblFungi	17934	6
273	4918	Ascomycota	Pichiomycetes	Alaninales	Pachysolen tannophilus NRRL Y-2460	EnsemblFungi	5666	7
274	13370	Ascomycota	Pichiomycetes	Pichiales	Brettanomyces naardenensis	EnsemblFungi	5179	7
275	4922	Ascomycota	Pichiomycetes	Pichiales	Komagataella pastoris	EnsemblFungi	5040	5
276	460519	Ascomycota	Pichiomycetes	Pichiales	Komagataella phaffii CBS 7435	EnsemblFungi	5282	5
277	317047	Ascomycota	Pichiomycetes	Pichiales	Kuraishia capsulata CBS 1993	EnsemblFungi	6029	8
278	1005962	Ascomycota	Pichiomycetes	Pichiales	Ogataea parapolymorpha DL-1	EnsemblFungi	5325	7
279	2053387	Ascomycota	Pichiomycetes	Pichiales	Ogataea polymorpha str. NCYC 495 leu1.1	EnsemblFungi	5173	7
280	4909	Ascomycota	Pichiomycetes	Pichiales	Pichia kudriavzevii str. 129	EnsemblFungi	5470	4
281	4926	Ascomycota	Pichiomycetes	Pichiales	Pichia membranifaciens NRRL Y-2026	EnsemblFungi	5542	6
282	45609	Ascomycota	Pichiomycetes	Serinales	Babjeviella inositovora NRRL Y-12698	EnsemblFungi	6399	7
283	4959	Ascomycota	Pichiomycetes	Serinales	Debaryomyces hansenii CBS767	EnsemblFungi	6272	8
284	717740	Ascomycota	Pichiomycetes	Serinales	Hyphopichia burtonii NRRL Y-1933	EnsemblFungi	5996	8
285	2683074	Ascomycota	Pichiomycetes	Serinales	Metschnikowia aff. pulcherrima str. APC 1.2	EnsemblFungi	5800	7
286	1807683	Ascomycota	Pichiomycetes	Serinales	Metschnikowia sp. JCM 33374	EnsemblFungi	6658	5
287	36022	Ascomycota	Saccharomycetes	Phaffomycetales	Cyberlindnera fabianii str. 65	EnsemblFungi	5509	7
288	4903	Ascomycota	Saccharomycetes	Phaffomycetales	Cyberlindnera jadinii NRRL Y-1542	EnsemblFungi	6032	9
289	4927	Ascomycota	Saccharomycetes	Phaffomycetales	Wickerhamomyces anomalus NRRL Y-366-8	EnsemblFungi	6421	9
290	1041607	Ascomycota	Saccharomycetes	Phaffomycetales	Wickerhamomyces ciferrii str. NRRL Y-1031	EnsemblFungi	6702	9
291	28985	Ascomycota	Saccharomycetes	Saccharomycetales	Kluyveromyces lactis str. NRRL Y-1140	EnsemblFungi	5076	5
292	4930	Ascomycota	Saccharomycetes	Saccharomycetales	Saccharomyces boulardii (nom. inval.) str. biocodex	EnsemblFungi	5482	8
293	4932	Ascomycota	Saccharomycetes	Saccharomycetales	Saccharomyces cerevisiae	EnsemblFungi	6600	10
294	1080349	Ascomycota	Saccharomycetes	Saccharomycetales	Saccharomyces eubayanus str. FM1318	EnsemblFungi	5379	10
295	27292	Ascomycota	Saccharomycetes	Saccharomycetales	Saccharomyces pastorianus	EnsemblFungi	10760	17
296	36033	Ascomycota	Saccharomycetes	Saccharomycetales	Vanderwaltozyma polyspora DSM 70294	EnsemblFungi	5367	6
297	4954	Ascomycota	Saccharomycetes	Saccharomycetales	Zygosaccharomyces bailii	EnsemblFungi	5141	5
298	1365886	Ascomycota	Saccharomycetes	Saccharomycetales	Zygosaccharomyces parabailii str. ATCC 60483	EnsemblFungi	10086	10
299	866546	Ascomycota	Schizosaccharomycetes	Schizosaccharomycetales	Schizosaccharomyces cryophilus	EnsemblFungi	5180	4
300	4896	Ascomycota	Schizosaccharomycetes	Schizosaccharomycetales	Schizosaccharomyces pombe	EnsemblFungi	5146	5
301	393283	Ascomycota	Sordariomycetes	Amphisphaeriales	Pestalotiopsis fici W106-1	EnsemblFungi	15413	8
302	177197	Ascomycota	Sordariomycetes	Coniochaetales	Coniochaeta ligniaria NRRL 30616	EnsemblFungi	13658	7
303	177199	Ascomycota	Sordariomycetes	Coniochaetales	Coniochaeta pulveracea str. CAB683	EnsemblFungi	10035	7
304	1849801	Ascomycota	Sordariomycetes	Coniochaetales	Coniochaeta sp. 2T2.1	EnsemblFungi	24733	13
305	1214573	Ascomycota	Sordariomycetes	Diaporthales	Diaporthe ampelina	EnsemblFungi	10704	2
306	158607	Ascomycota	Sordariomycetes	Diaporthales	Diaporthe helianthi str. 7/96	EnsemblFungi	13139	6
307	2025994	Ascomycota	Sordariomycetes	Diaporthales	Coniella lustricola str. B22-T-1	EnsemblFungi	11314	7
308	1230097	Ascomycota	Sordariomycetes	Diaporthales	Cytospora leucostoma	EnsemblFungi	10072	7
309	83174	Ascomycota	Sordariomycetes	Diaporthales	Valsa mali str. 03-8	EnsemblFungi	11165	7
310	83174	Ascomycota	Sordariomycetes	Diaporthales	Valsa malicola	EnsemblFungi	10561	7
311	83174	Ascomycota	Sordariomycetes	Diaporthales	Valsa sordida	EnsemblFungi	9828	7
312	702518	Ascomycota	Sordariomycetes	Glomerellales	Colletotrichum asianum	EnsemblFungi	17966	7
313	708187	Ascomycota	Sordariomycetes	Glomerellales	Colletotrichum chlorophyti str. NTL11	EnsemblFungi	10310	5
314	710243	Ascomycota	Sordariomycetes	Glomerellales	Colletotrichum fioriniae PJ7	EnsemblFungi	13759	7
315	690256	Ascomycota	Sordariomycetes	Glomerellales	Colletotrichum fructicola str. CGMCC 3.17371	EnsemblFungi	18400	8
316	2707338	Ascomycota	Sordariomycetes	Glomerellales	Colletotrichum gloeosporioides	EnsemblFungi	15381	7
317	2707348	Ascomycota	Sordariomycetes	Glomerellales	Colletotrichum graminicola	EnsemblFungi	12020	8
318	80884	Ascomycota	Sordariomycetes	Glomerellales	Colletotrichum higginsianum	EnsemblFungi	16141	5
319	1573173	Ascomycota	Sordariomycetes	Glomerellales	Colletotrichum incanum str. MAFF 238704	EnsemblFungi	12809	9
320	306554	Ascomycota	Sordariomycetes	Glomerellales	Colletotrichum nymphaeae SA-01	EnsemblFungi	14404	7
321	2707354	Ascomycota	Sordariomycetes	Glomerellales	Colletotrichum orbiculare	EnsemblFungi	13346	6
322	1209926	Ascomycota	Sordariomycetes	Glomerellales	Colletotrichum orchidophilum str. IMI 309357	EnsemblFungi	14496	8
323	1209931	Ascomycota	Sordariomycetes	Glomerellales	Colletotrichum salicis str. CBS 607.94	EnsemblFungi	13783	4
324	2078593	Ascomycota	Sordariomycetes	Glomerellales	Colletotrichum shisoi str. PG-2018a	EnsemblFungi	11848	6
325	1347389	Ascomycota	Sordariomycetes	Glomerellales	Colletotrichum sidae	EnsemblFungi	12442	5
326	703756	Ascomycota	Sordariomycetes	Glomerellales	Colletotrichum simmondsii str. CBS122122	EnsemblFungi	13884	8
327	1347390	Ascomycota	Sordariomycetes	Glomerellales	Colletotrichum spinosum	EnsemblFungi	12540	6
328	1173701	Ascomycota	Sordariomycetes	Glomerellales	Colletotrichum sublineola str. TX430BB	EnsemblFungi	12699	9
329	1306861	Ascomycota	Sordariomycetes	Glomerellales	Colletotrichum tanaceti	EnsemblFungi	12172	8
330	708197	Ascomycota	Sordariomycetes	Glomerellales	Colletotrichum tofieldiae str. 0861	EnsemblFungi	12501	8
331	5466	Ascomycota	Sordariomycetes	Glomerellales	Colletotrichum trifolii str. 543-2	EnsemblFungi	12292	6
332	1051613	Ascomycota	Sordariomycetes	Glomerellales	Verticillium alfalfae VaMs.102	EnsemblFungi	10237	6
333	27337	Ascomycota	Sordariomycetes	Glomerellales	Verticillium dahliae	EnsemblFungi	10457	8
334	100787	Ascomycota	Sordariomycetes	Glomerellales	Verticillium longisporum	EnsemblFungi	21072	14
335	5111	Ascomycota	Sordariomycetes	Hypocreales	Claviceps purpurea 20.1	EnsemblFungi	8823	3
336	98403	Ascomycota	Sordariomycetes	Hypocreales	Drechmeria coniospora str. ARSEF 6962	EnsemblFungi	8236	4
337	92637	Ascomycota	Sordariomycetes	Hypocreales	Metarhizium acridum CQMa 102	EnsemblFungi	9849	5
338	92629	Ascomycota	Sordariomycetes	Hypocreales	Metarhizium album ARSEF 1941	EnsemblFungi	8472	6
339	5530	Ascomycota	Sordariomycetes	Hypocreales	Metarhizium anisopliae ARSEF 549	EnsemblFungi	10891	5
340	500148	Ascomycota	Sordariomycetes	Hypocreales	Metarhizium brunneum ARSEF 3297	EnsemblFungi	10689	6
341	169041	Ascomycota	Sordariomycetes	Hypocreales	Metarhizium guizhouense ARSEF 977	EnsemblFungi	11787	5
342	1650735	Ascomycota	Sordariomycetes	Hypocreales	Metarhizium majus ARSEF 297	EnsemblFungi	11535	5
343	1649241	Ascomycota	Sordariomycetes	Hypocreales	Metarhizium rileyi RCEF 4871	EnsemblFungi	8764	6
344	568076	Ascomycota	Sordariomycetes	Hypocreales	Metarhizium robertsii	EnsemblFungi	12384	6
345	324773	Ascomycota	Sordariomycetes	Hypocreales	Moelleriella libera RCEF 2490	EnsemblFungi	8461	6
346	280754	Ascomycota	Sordariomycetes	Hypocreales	Pochonia chlamydosporia 123	EnsemblFungi	11961	9
347	1159556	Ascomycota	Sordariomycetes	Hypocreales	Ustilaginoidea virens	EnsemblFungi	6451	3
348	2714763	Ascomycota	Sordariomycetes	Hypocreales	Akanthomyces lecanii RCEF 1005	EnsemblFungi	11030	8
349	176275	Ascomycota	Sordariomycetes	Hypocreales	Beauveria bassiana	EnsemblFungi	10179	8
350	118266	Ascomycota	Sordariomycetes	Hypocreales	Beauveria brongniartii RCEF 3172	EnsemblFungi	9595	6
351	114497	Ascomycota	Sordariomycetes	Hypocreales	Cordyceps fumosorosea ARSEF 2679	EnsemblFungi	10061	7
352	43265	Ascomycota	Sordariomycetes	Hypocreales	Cordyceps javanica	EnsemblFungi	11441	6
353	73501	Ascomycota	Sordariomycetes	Hypocreales	Cordyceps militaris CM01	EnsemblFungi	9651	8
354	1755423	Ascomycota	Sordariomycetes	Hypocreales	Cordyceps sp. RAO-2017	EnsemblFungi	11255	5
355	153665	Ascomycota	Sordariomycetes	Hypocreales	Torrubiella hemipterigena str. BCC 1449	EnsemblFungi	11471	7
356	159075	Ascomycota	Sordariomycetes	Hypocreales	Acremonium chrysogenum ATCC 11550	EnsemblFungi	8901	6
357	150374	Ascomycota	Sordariomycetes	Hypocreales	Escovopsis weberi	EnsemblFungi	6870	2
358	490622	Ascomycota	Sordariomycetes	Hypocreales	Trichoderma arundinaceum	EnsemblFungi	10473	6
359	101201	Ascomycota	Sordariomycetes	Hypocreales	Trichoderma asperellum CBS 433.97	EnsemblFungi	12557	6
360	63577	Ascomycota	Sordariomycetes	Hypocreales	Trichoderma atroviride IMI 206040	EnsemblFungi	11816	6
361	58853	Ascomycota	Sordariomycetes	Hypocreales	Trichoderma citrinoviride str. TUCIM 6016	EnsemblFungi	9735	6
362	398673	Ascomycota	Sordariomycetes	Hypocreales	Trichoderma gamsii str. T6085	EnsemblFungi	11179	6
363	1491466	Ascomycota	Sordariomycetes	Hypocreales	Trichoderma guizhouense str. NJAU 4742	EnsemblFungi	11255	7
364	5544	Ascomycota	Sordariomycetes	Hypocreales	Trichoderma harzianum CBS 226.95	EnsemblFungi	14065	6
365	5548	Ascomycota	Sordariomycetes	Hypocreales	Trichoderma longibrachiatum ATCC 18648	EnsemblFungi	10934	6
366	858221	Ascomycota	Sordariomycetes	Hypocreales	Trichoderma parareesei	EnsemblFungi	9062	6
367	51453	Ascomycota	Sordariomycetes	Hypocreales	Trichoderma reesei RUT C-30	EnsemblFungi	9849	6
368	29875	Ascomycota	Sordariomycetes	Hypocreales	Trichoderma virens	EnsemblFungi	12406	6
369	131363	Ascomycota	Sordariomycetes	Hypocreales	Fusarium ambrosium	EnsemblFungi	17262	6
370	231269	Ascomycota	Sordariomycetes	Hypocreales	Fusarium coffeatum	EnsemblFungi	11779	6
371	1147111	Ascomycota	Sordariomycetes	Hypocreales	Fusarium euwallaceae str. UCR1854	EnsemblFungi	17630	6
372	2675880	Ascomycota	Sordariomycetes	Hypocreales	Fusarium flagelliforme	EnsemblFungi	13046	6
373	1325733	Ascomycota	Sordariomycetes	Hypocreales	Fusarium floridanum	EnsemblFungi	16762	5
374	171627	Ascomycota	Sordariomycetes	Hypocreales	Fusarium fujikuroi	EnsemblFungi	13578	10
375	5518	Ascomycota	Sordariomycetes	Hypocreales	Fusarium graminearum	EnsemblFungi	13280	7
376	2010991	Ascomycota	Sordariomycetes	Hypocreales	Fusarium kuroshium	EnsemblFungi	16485	5
377	179993	Ascomycota	Sordariomycetes	Hypocreales	Fusarium langsethiae str. Fl201059	EnsemblFungi	11940	8
378	694270	Ascomycota	Sordariomycetes	Hypocreales	Fusarium longipes	EnsemblFungi	11421	8
379	192010	Ascomycota	Sordariomycetes	Hypocreales	Fusarium mangiferae	EnsemblFungi	15804	10
380	42673	Ascomycota	Sordariomycetes	Hypocreales	Fusarium nygamai	EnsemblFungi	16019	9
381	2502994	Ascomycota	Sordariomycetes	Hypocreales	Fusarium odoratissimum NRRL 54006 str. 54006 (II5)	EnsemblFungi	22487	9
382	171631	Ascomycota	Sordariomycetes	Hypocreales	Fusarium oxysporum	EnsemblFungi	18818	9
383	36050	Ascomycota	Sordariomycetes	Hypocreales	Fusarium poae	EnsemblFungi	14740	10
384	948311	Ascomycota	Sordariomycetes	Hypocreales	Fusarium proliferatum	EnsemblFungi	15254	10
385	101028	Ascomycota	Sordariomycetes	Hypocreales	Fusarium pseudograminearum	EnsemblFungi	12448	7
386	232080	Ascomycota	Sordariomycetes	Hypocreales	Fusarium solani	EnsemblFungi	15705	8
387	1859069	Ascomycota	Sordariomycetes	Hypocreales	Fusarium sp. AF-8	EnsemblFungi	16263	6
388	5514	Ascomycota	Sordariomycetes	Hypocreales	Fusarium sporotrichioides	EnsemblFungi	11961	7
389	56646	Ascomycota	Sordariomycetes	Hypocreales	Fusarium venenatum	EnsemblFungi	13946	8
390	117187	Ascomycota	Sordariomycetes	Hypocreales	Fusarium verticillioides	EnsemblFungi	13769	3
391	78410	Ascomycota	Sordariomycetes	Hypocreales	Neonectria ditissima str. R09/05	EnsemblFungi	12685	7
392	332947	Ascomycota	Sordariomycetes	Hypocreales	Hirsutella minnesotensis 3608	EnsemblFungi	9390	2
393	1399860	Ascomycota	Sordariomycetes	Hypocreales	Ophiocordyceps australis	EnsemblFungi	8171	6
394	2039875	Ascomycota	Sordariomycetes	Hypocreales	Ophiocordyceps camponoti-leonardi (nom. inval.)	EnsemblFungi	7046	8
395	2004952	Ascomycota	Sordariomycetes	Hypocreales	Ophiocordyceps camponoti-rufipedis	EnsemblFungi	7618	8
396	2039874	Ascomycota	Sordariomycetes	Hypocreales	Ophiocordyceps camponoti-saundersi (nom. inval.)	EnsemblFungi	6946	8
397	1330020	Ascomycota	Sordariomycetes	Hypocreales	Ophiocordyceps polyrhachis-furcata BCC 54312	EnsemblFungi	10146	8
398	72228	Ascomycota	Sordariomycetes	Hypocreales	Ophiocordyceps sinensis CO18	EnsemblFungi	6972	6
399	268505	Ascomycota	Sordariomycetes	Hypocreales	Ophiocordyceps unilateralis str. SC16a	EnsemblFungi	8577	6
400	33203	Ascomycota	Sordariomycetes	Hypocreales	Purpureocillium lilacinum	EnsemblFungi	11773	9
401	45235	Ascomycota	Sordariomycetes	Hypocreales	Tolypocladium capitatum str. CBS 113982	EnsemblFungi	7646	7
402	71617	Ascomycota	Sordariomycetes	Hypocreales	Tolypocladium ophioglossoides CBS 100239	EnsemblFungi	9317	4
403	94208	Ascomycota	Sordariomycetes	Hypocreales	Tolypocladium paradoxum str. NRBC 100945	EnsemblFungi	8983	7
404	74722	Ascomycota	Sordariomycetes	Hypocreales	Stachybotrys chartarum IBT 40288	EnsemblFungi	11368	7
405	74721	Ascomycota	Sordariomycetes	Hypocreales	Stachybotrys chlorohalonata IBT 40285	EnsemblFungi	10706	6
406	36779	Ascomycota	Sordariomycetes	Magnaporthales	Gaeumannomyces tritici R3-111a-1	EnsemblFungi	14650	8
407	148303	Ascomycota	Sordariomycetes	Magnaporthales	Magnaporthe oryzae	EnsemblFungi	12755	7
408	148303	Ascomycota	Sordariomycetes	Magnaporthales	Magnaporthe poae	EnsemblFungi	11370	5
409	318829	Ascomycota	Sordariomycetes	Magnaporthales	Pyricularia oryzae	EnsemblFungi	13521	7
410	88771	Ascomycota	Sordariomycetes	Microascales	Ceratocystis platani str. CFO	EnsemblFungi	5622	2
411	72032	Ascomycota	Sordariomycetes	Microascales	Thielaviopsis punctulata	EnsemblFungi	5296	4
412	563466	Ascomycota	Sordariomycetes	Microascales	Scedosporium apiospermum str. IHEM 14462	EnsemblFungi	8376	5
413	655863	Ascomycota	Sordariomycetes	Ophiostomatales	Grosmannia clavigera kw1407	EnsemblFungi	8312	5
414	61273	Ascomycota	Sordariomycetes	Ophiostomatales	Ophiostoma piceae UAMH 11346 str. UAMH-11346	EnsemblFungi	8884	5
415	545650	Ascomycota	Sordariomycetes	Ophiostomatales	Sporothrix brasiliensis 5110	EnsemblFungi	9091	5
416	29907	Ascomycota	Sordariomycetes	Ophiostomatales	Sporothrix insectorum RCEF 264	EnsemblFungi	9496	6
417	29908	Ascomycota	Sordariomycetes	Ophiostomatales	Sporothrix schenckii 1099-18	EnsemblFungi	10293	6
418	38033	Ascomycota	Sordariomycetes	Sordariales	Chaetomium globosum CBS 148.51	EnsemblFungi	11048	3
419	5149	Ascomycota	Sordariomycetes	Sordariales	Chaetomium thermophilum var. thermophilum DSM 1495	EnsemblFungi	7165	4
420	2587412	Ascomycota	Sordariomycetes	Sordariales	Podospora anserina S mat+	EnsemblFungi	10544	7
421	5141	Ascomycota	Sordariomycetes	Sordariales	Neurospora crassa	EnsemblFungi	10813	6
422	40127	Ascomycota	Sordariomycetes	Sordariales	Neurospora tetrasperma FGSC 2508	EnsemblFungi	10380	6
423	5147	Ascomycota	Sordariomycetes	Sordariales	Sordaria macrospora	EnsemblFungi	9771	6
424	223192	Ascomycota	Sordariomycetes	Togniniales	Phaeoacremonium minimum UCRPA7	EnsemblFungi	8834	3
425	196109	Ascomycota	Sordariomycetes	Xylariales	Microdochium bolleyi str. J235TASD1	EnsemblFungi	13165	9
426	97096	Ascomycota	Sordariomycetes	Xylariales	Eutypa lata UCREL1	EnsemblFungi	11685	2
427	155416	Ascomycota	Sordariomycetes	Xylariales	Monosporascus cannonballus	EnsemblFungi	10678	6
428	155417	Ascomycota	Sordariomycetes	Xylariales	Monosporascus ibericus	EnsemblFungi	11060	6
429	1756114	Ascomycota	Sordariomycetes	Xylariales	Monosporascus sp. 5C6A	EnsemblFungi	12534	7
430	1769485	Ascomycota	Sordariomycetes	Xylariales	Daldinia sp. EC12	EnsemblFungi	11161	6
431	1896109	Ascomycota	Sordariomycetes	Xylariales	Hypoxylon sp. CI-4A	EnsemblFungi	11701	6
432	77044	Ascomycota	Sordariomycetes	Xylariales	Rosellinia necatrix str. W97	EnsemblFungi	12444	6
433	2512241	Ascomycota	Sordariomycetes	Xylariales	Xylaria flabelliformis str. G536	EnsemblFungi	11404	4
434	363999	Ascomycota	Sordariomycetes	Xylariales	Xylaria grammica str. IHI A82	EnsemblFungi	12126	5
435	37992	Ascomycota	Sordariomycetes	Xylariales	Xylaria hypoxylon str. DSM 108379	EnsemblFungi	11038	5
436	323545	Ascomycota	Sordariomycetes	Xylariales	Xylaria multiplex str. DSM 110363	EnsemblFungi	10964	5
437	5341	Basidiomycota	Agaricomycetes	Agaricales	Agaricus bisporus var. burnettii JB137-S8	EnsemblFungi	11278	9
438	41956	Basidiomycota	Agaricomycetes	Agaricales	Amanita muscaria Koide BX008	EnsemblFungi	18093	7
439	235537	Basidiomycota	Agaricomycetes	Agaricales	Amanita thiersii Skay4041	EnsemblFungi	10346	9
440	181874	Basidiomycota	Agaricomycetes	Agaricales	Panaeolus cyanescens	EnsemblFungi	13420	9
441	40457	Basidiomycota	Agaricomycetes	Agaricales	Fistulina hepatica ATCC 64428	EnsemblFungi	9387	7
442	89243	Basidiomycota	Agaricomycetes	Agaricales	Laccaria amethystina LaAM-08-1	EnsemblFungi	21033	10
443	29883	Basidiomycota	Agaricomycetes	Agaricales	Laccaria bicolor S238N-H82	EnsemblFungi	18215	10
444	109633	Basidiomycota	Agaricomycetes	Agaricales	Galerina marginata CBS 339.88	EnsemblFungi	21391	9
445	231916	Basidiomycota	Agaricomycetes	Agaricales	Gymnopilus dilepis	EnsemblFungi	16222	10
446	76867	Basidiomycota	Agaricomycetes	Agaricales	Hebeloma cylindrosporum h7	EnsemblFungi	15376	8
447	93625	Basidiomycota	Agaricomycetes	Agaricales	Psilocybe cyanescens	EnsemblFungi	15936	7
448	39966	Basidiomycota	Agaricomycetes	Agaricales	Hypsizygus marmoreus str. 51987-8	EnsemblFungi	16627	9
449	1916073	Basidiomycota	Agaricomycetes	Agaricales	Termitomyces sp. J132	EnsemblFungi	11143	3
450	221103	Basidiomycota	Agaricomycetes	Agaricales	Moniliophthora roreri MCA 2997	EnsemblFungi	17910	10
451	1447940	Basidiomycota	Agaricomycetes	Agaricales	Gymnopus androsaceus JB14	EnsemblFungi	29370	13
452	93827	Basidiomycota	Agaricomycetes	Agaricales	Gymnopus luxurians FD-317 M1	EnsemblFungi	14604	12
453	5353	Basidiomycota	Agaricomycetes	Agaricales	Lentinula edodes str. G408PP-4	EnsemblFungi	12051	7
454	47427	Basidiomycota	Agaricomycetes	Agaricales	Armillaria gallica str. Ar21-2	EnsemblFungi	25695	9
455	47428	Basidiomycota	Agaricomycetes	Agaricales	Armillaria ostoyae	EnsemblFungi	22299	7
456	1076256	Basidiomycota	Agaricomycetes	Agaricales	Armillaria solidipes str. 28-4	EnsemblFungi	20808	9
457	394432	Basidiomycota	Agaricomycetes	Agaricales	Cylindrobasidium torrendii FP15055 ss-10	EnsemblFungi	13936	12
458	5322	Basidiomycota	Agaricomycetes	Agaricales	Pleurotus ostreatus PC15	EnsemblFungi	12296	7
459	181527	Basidiomycota	Agaricomycetes	Agaricales	Pluteus cervinus str. NL-1719	EnsemblFungi	19812	7
460	71717	Basidiomycota	Agaricomycetes	Agaricales	Coprinellus micaceus str. FP101781	EnsemblFungi	23412	13
461	5346	Basidiomycota	Agaricomycetes	Agaricales	Coprinopsis cinerea okayama7#130	EnsemblFungi	13356	8
462	230819	Basidiomycota	Agaricomycetes	Agaricales	Coprinopsis marcescibilis str. CBS 121175	EnsemblFungi	14545	7
463	71729	Basidiomycota	Agaricomycetes	Agaricales	Psathyrella aberdarensis str. IHI B618	EnsemblFungi	14703	6
464	104239	Basidiomycota	Agaricomycetes	Agaricales	Pterula gracilis str. CBS 309.79	EnsemblFungi	12872	13
465	5333	Basidiomycota	Agaricomycetes	Agaricales	Auriculariopsis ampla str. NL-1724	EnsemblFungi	15576	11
466	5334	Basidiomycota	Agaricomycetes	Agaricales	Schizophyllum commune H4-8 - GCA_000143185.2	EnsemblFungi	16193	10
467	5399	Basidiomycota	Agaricomycetes	Agaricales	Agrocybe aegerita	EnsemblFungi	13341	6
468	71945	Basidiomycota	Agaricomycetes	Agaricales	Hypholoma sublateritium FD-334 SS-4	EnsemblFungi	17771	9
469	1314803	Basidiomycota	Agaricomycetes	Agaricales	Dendrothele bispora CBS 962.96	EnsemblFungi	33640	15
470	5309	Basidiomycota	Agaricomycetes	Atheliales	Fibularhizoctonia sp. CBS 109695	EnsemblFungi	32854	7
471	80663	Basidiomycota	Agaricomycetes	Atheliales	Piloderma croceum F 1598	EnsemblFungi	21524	8
472	5219	Basidiomycota	Agaricomycetes	Auriculariales	Exidia glandulosa HHB12029	EnsemblFungi	26690	7
473	80637	Basidiomycota	Agaricomycetes	Boletales	Coniophora puteana RWD-64-598 SS2	EnsemblFungi	13758	8
474	994086	Basidiomycota	Agaricomycetes	Boletales	Hydnomerulius pinastri MD-312	EnsemblFungi	7914	4
475	71150	Basidiomycota	Agaricomycetes	Boletales	Paxillus involutus ATCC 200175	EnsemblFungi	11740	4
476	463315	Basidiomycota	Agaricomycetes	Boletales	Paxillus rubicundulus Ve08.2h10	EnsemblFungi	22036	8
477	180088	Basidiomycota	Agaricomycetes	Boletales	Rhizopogon vesiculosus str. AM-OR11-056	EnsemblFungi	14197	9
478	80600	Basidiomycota	Agaricomycetes	Boletales	Rhizopogon vinicolor AM-OR11-026	EnsemblFungi	14465	13
479	178872	Basidiomycota	Agaricomycetes	Boletales	Pisolithus microcarpus 441	EnsemblFungi	20982	8
480	37468	Basidiomycota	Agaricomycetes	Boletales	Pisolithus tinctorius Marx 270	EnsemblFungi	22653	9
481	5384	Basidiomycota	Agaricomycetes	Boletales	Suillus luteus UH-Slu-Lm8-n1	EnsemblFungi	18303	8
482	264124	Basidiomycota	Agaricomycetes	Cantharellales	Botryobasidium botryosum FD-172 SS1	EnsemblFungi	16502	7
483	1582974	Basidiomycota	Agaricomycetes	Cantharellales	Ceratobasidium theobromae str. CT2	EnsemblFungi	9262	8
484	456999	Basidiomycota	Agaricomycetes	Cantharellales	Rhizoctonia solani	EnsemblFungi	11897	9
485	156515	Basidiomycota	Agaricomycetes	Cantharellales	Tulasnella calospora MUT 4182	EnsemblFungi	19554	8
486	68786	Basidiomycota	Agaricomycetes	Geastrales	Sphaerobolus stellatus SS14	EnsemblFungi	25079	1
487	104355	Basidiomycota	Agaricomycetes	Gloeophyllales	Gloeophyllum trabeum ATCC 11539	EnsemblFungi	11755	7
488	5364	Basidiomycota	Agaricomycetes	Gloeophyllales	Heliocybe sulcata str. OMC1185	EnsemblFungi	12569	6
489	38799	Basidiomycota	Agaricomycetes	Gloeophyllales	Neolentinus lepideus HHB14362 ss-1	EnsemblFungi	13157	7
490	167371	Basidiomycota	Agaricomycetes	Hymenochaetales	Phellinidium pouzarii str. DSM 108285	EnsemblFungi	8701	5
491	2282107	Basidiomycota	Agaricomycetes	Hymenochaetales	Pyrrhoderma noxium	EnsemblFungi	9930	7
492	50990	Basidiomycota	Agaricomycetes	Hymenochaetales	Rickenella mellea str. SZMC22713	EnsemblFungi	17134	8
493	202697	Basidiomycota	Agaricomycetes	Jaapiales	Jaapia argillacea MUCL 33604	EnsemblFungi	16375	8
494	1314783	Basidiomycota	Agaricomycetes	Polyporales	Daedalea quercina L-15889	EnsemblFungi	12192	8
495	599839	Basidiomycota	Agaricomycetes	Polyporales	Fibroporia radiculosa str. TFFH 294	EnsemblFungi	9262	6
496	40483	Basidiomycota	Agaricomycetes	Polyporales	Fomitopsis pinicola FP-58527 SS1	EnsemblFungi	13852	8
497	34474	Basidiomycota	Agaricomycetes	Polyporales	Fomitopsis rosea str. DSM 105464	EnsemblFungi	11202	6
498	561896	Basidiomycota	Agaricomycetes	Polyporales	Postia placenta MAD-698-R-SB12	EnsemblFungi	12539	7
499	36075	Basidiomycota	Agaricomycetes	Polyporales	Ganoderma sinense ZZ0214-1	EnsemblFungi	15478	6
500	42742	Basidiomycota	Agaricomycetes	Polyporales	Gelatoporia subvermispora B	EnsemblFungi	12123	7
501	5630	Basidiomycota	Agaricomycetes	Polyporales	Laetiporus sulphureus 93-53	EnsemblFungi	13745	8
502	5627	Basidiomycota	Agaricomycetes	Polyporales	Grifola frondosa str. 9006-11	EnsemblFungi	15039	6
503	5307	Basidiomycota	Agaricomycetes	Polyporales	Phlebia centrifuga str. DSM 108282	EnsemblFungi	8473	3
504	231932	Basidiomycota	Agaricomycetes	Polyporales	Phanerochaete carnosa HHB-10118-sp	EnsemblFungi	13925	7
505	273507	Basidiomycota	Agaricomycetes	Polyporales	Phanerochaete chrysosporium	EnsemblFungi	13602	7
506	82310	Basidiomycota	Agaricomycetes	Polyporales	Phlebiopsis gigantea 11061_1 CR5-6	EnsemblFungi	11855	6
507	114155	Basidiomycota	Agaricomycetes	Polyporales	Dichomitus squalens LYAD-421 SS1	EnsemblFungi	7192	1
508	5365	Basidiomycota	Agaricomycetes	Polyporales	Lentinus tigrinus ALCF2SS1-6	EnsemblFungi	15569	7
509	5639	Basidiomycota	Agaricomycetes	Polyporales	Polyporus arcularius HHB13444	EnsemblFungi	17496	7
510	5637	Basidiomycota	Agaricomycetes	Polyporales	Polyporus brumalis str. BRFM 1820	EnsemblFungi	18242	7
511	5643	Basidiomycota	Agaricomycetes	Polyporales	Trametes cinnabarina str. BRFM137	EnsemblFungi	10233	5
512	158605	Basidiomycota	Agaricomycetes	Polyporales	Trametes coccinea BRFM310	EnsemblFungi	12693	6
513	154538	Basidiomycota	Agaricomycetes	Polyporales	Trametes pubescens str. FBCC735	EnsemblFungi	14438	6
514	81056	Basidiomycota	Agaricomycetes	Polyporales	Wolfiporia cocos MD-104 SS10	EnsemblFungi	12212	7
515	139825	Basidiomycota	Agaricomycetes	Polyporales	Sparassis crispa	EnsemblFungi	13157	7
516	2447956	Basidiomycota	Agaricomycetes	Polyporales	Antrodiella citrinella str. DSM 108506	EnsemblFungi	9805	5
517	92696	Basidiomycota	Agaricomycetes	Polyporales	Steccherinum ochraceum str. LE-BIN_3174	EnsemblFungi	12260	7
518	1095465	Basidiomycota	Agaricomycetes	Russulales	Bondarzewia mesenterica str. DSM 108281	EnsemblFungi	10523	4
519	984962	Basidiomycota	Agaricomycetes	Russulales	Heterobasidion irregulare TC 32-1	EnsemblFungi	13275	7
520	205917	Basidiomycota	Agaricomycetes	Russulales	Dentipellis fragilis str. DSM 105465	EnsemblFungi	11717	5
521	2011819	Basidiomycota	Agaricomycetes	Russulales	Dentipellis sp. KUC8613	EnsemblFungi	14316	7
522	135208	Basidiomycota	Agaricomycetes	Russulales	Hericium alpestre str. DSM 108284	EnsemblFungi	11007	1
523	1756134	Basidiomycota	Agaricomycetes	Russulales	Peniophora sp. CONT	EnsemblFungi	18945	6
524	65672	Basidiomycota	Agaricomycetes	Sebacinales	Serendipita indica DSM 11827	EnsemblFungi	11766	7
525	109899	Basidiomycota	Agaricomycetes	Sebacinales	Serendipita vermifera MAFF 305830	EnsemblFungi	15245	8
526	1314777	Basidiomycota	Agaricomycetes	Sistotremastrales	Sistotremastrum niveocremeum HHB9708	EnsemblFungi	13076	6
527	467971	Basidiomycota	Agaricomycetes	Sistotremastrales	Sistotremastrum suecicum HHB10207 ss-3	EnsemblFungi	13654	7
528	29889	Basidiomycota	Dacrymycetes	Dacrymycetales	Calocera cornea HHB12733	EnsemblFungi	13154	8
529	63146	Basidiomycota	Dacrymycetes	Dacrymycetales	Calocera viscosa TUFC12733	EnsemblFungi	12363	9
530	1858805	Basidiomycota	Dacrymycetes	Dacrymycetales	Dacryopinax primogenitus str. DJM-731 SS1	EnsemblFungi	10240	9
531	401625	Basidiomycota	Exobasidiomycetes	Ceraceosorales	Ceraceosorus bombacis	EnsemblFungi	8022	9
532	1522189	Basidiomycota	Exobasidiomycetes	Ceraceosorales	Ceraceosorus guamensis str. MCA 4658	EnsemblFungi	7822	7
533	106004	Basidiomycota	Microbotryomycetes	Leucosporidiales	Leucosporidium creatinivorum str. 62-1032	EnsemblFungi	9854	10
534	269621	Basidiomycota	Microbotryomycetes	Microbotryales	Microbotryum intermedium	EnsemblFungi	8142	6
535	289078	Basidiomycota	Microbotryomycetes	Microbotryales	Microbotryum saponariae	EnsemblFungi	10587	7
536	796604	Basidiomycota	Microbotryomycetes	Microbotryales	Microbotryum silenes-dioicae	EnsemblFungi	13241	7
537	5272	Basidiomycota	Microbotryomycetes	Microbotryales	Microbotryum violaceum	EnsemblFungi	7819	8
538	5288	Basidiomycota	Microbotryomycetes	Sporidiobolales	Rhodotorula diobovata str. UCD-FST 08-225	EnsemblFungi	7970	10
539	29898	Basidiomycota	Microbotryomycetes	Sporidiobolales	Rhodotorula graminis WP1	EnsemblFungi	7278	7
540	1853554	Basidiomycota	Microbotryomycetes	Sporidiobolales	Rhodotorula sp. JG-1b	EnsemblFungi	6681	9
541	741276	Basidiomycota	Microbotryomycetes	Sporidiobolales	Rhodotorula taiwanensis str. MD1149	EnsemblFungi	7014	10
542	5286	Basidiomycota	Microbotryomycetes	Sporidiobolales	Rhodotorula toruloides	EnsemblFungi	7538	10
543	34349	Basidiomycota	Mixiomycetes	Mixiales	Mixia osmundae IAM 14324	EnsemblFungi	6726	6
544	747676	Basidiomycota	Pucciniomycetes	Pucciniales	Melampsora larici-populina	EnsemblFungi	16372	6
545	27344	Basidiomycota	Pucciniomycetes	Pucciniales	Puccinia coronata var. avenae f. sp. avenae	EnsemblFungi	28270	9
546	5297	Basidiomycota	Pucciniomycetes	Pucciniales	Puccinia graminis	EnsemblFungi	15979	6
547	27349	Basidiomycota	Pucciniomycetes	Pucciniales	Puccinia sorghi str. RO10H11247	EnsemblFungi	21078	6
548	27350	Basidiomycota	Pucciniomycetes	Pucciniales	Puccinia striiformis	EnsemblFungi	15090	8
549	208348	Basidiomycota	Pucciniomycetes	Pucciniales	Puccinia triticina - GCA_000151525.2	EnsemblFungi	15685	6
550	264483	Basidiomycota	Tremellomycetes	Cystofilobasidiales	Phaffia rhodozyma	EnsemblFungi	6380	6
551	104669	Basidiomycota	Tremellomycetes	Tremellales	Cryptococcus amylolentus CBS 6039	EnsemblFungi	10306	5
552	5208	Basidiomycota	Tremellomycetes	Tremellales	Cryptococcus depauperatus CBS 7841	EnsemblFungi	6537	5
553	2591691	Basidiomycota	Tremellomycetes	Tremellales	Cryptococcus floricola str. DSM 27421	EnsemblFungi	8190	4
554	1884637	Basidiomycota	Tremellomycetes	Tremellales	Cryptococcus gattii CA1280	EnsemblFungi	6683	5
555	1897064	Basidiomycota	Tremellomycetes	Tremellales	Cryptococcus neoformans var. grubii 125.91	EnsemblFungi	6939	5
556	5619	Basidiomycota	Tremellomycetes	Tremellales	Cryptococcus wingfieldii CBS 7118	EnsemblFungi	8098	5
557	324769	Basidiomycota	Tremellomycetes	Tremellales	Kwoniella bestiolae CBS 10118	EnsemblFungi	9133	5
558	324770	Basidiomycota	Tremellomycetes	Tremellales	Kwoniella dejecticola CBS 10117	EnsemblFungi	8602	5
559	89924	Basidiomycota	Tremellomycetes	Tremellales	Kwoniella heveanensis BCC8398	EnsemblFungi	7927	5
560	1331196	Basidiomycota	Tremellomycetes	Tremellales	Kwoniella mangroviensis CBS 10435	EnsemblFungi	8429	5
561	453459	Basidiomycota	Tremellomycetes	Tremellales	Kwoniella pini CBS 10737	EnsemblFungi	7829	5
562	1734106	Basidiomycota	Tremellomycetes	Tremellales	Kwoniella shandongensis str. CBS 12478	EnsemblFungi	7424	5
563	71784	Basidiomycota	Tremellomycetes	Tremellales	Naematelia encephala str. 68-887.2	EnsemblFungi	7964	6
564	105984	Basidiomycota	Tremellomycetes	Trichosporonales	Apiotrichum porosum str. DSM 27194	EnsemblFungi	9153	4
565	879819	Basidiomycota	Tremellomycetes	Trichosporonales	Cutaneotrichosporon oleaginosum	EnsemblFungi	7921	4
566	82508	Basidiomycota	Tremellomycetes	Trichosporonales	Trichosporon asahii var. asahii CBS 2479	EnsemblFungi	8311	5
567	84753	Basidiomycota	Ustilaginomycetes	Ustilaginales	Moesziomyces antarcticus	EnsemblFungi	7088	8
568	84754	Basidiomycota	Ustilaginomycetes	Ustilaginales	Moesziomyces aphidis DSM 70725	EnsemblFungi	6011	7
569	5270	Basidiomycota	Ustilaginomycetes	Ustilaginales	Mycosarcoma maydis	EnsemblFungi	6783	8
570	280036	Basidiomycota	Ustilaginomycetes	Ustilaginales	Sporisorium graminicola str. CBS 10092	EnsemblFungi	6591	8
571	72558	Basidiomycota	Ustilaginomycetes	Ustilaginales	Sporisorium reilianum	EnsemblFungi	6673	8
572	49012	Basidiomycota	Ustilaginomycetes	Ustilaginales	Sporisorium scitamineum str. Ssc1	EnsemblFungi	6702	8
573	307758	Basidiomycota	Ustilaginomycetes	Ustilaginales	Ustilago bromivora str. UB2112	EnsemblFungi	7227	9
574	120017	Basidiomycota	Ustilaginomycetes	Ustilaginales	Ustilago hordei str. Uh4857-4	EnsemblFungi	7110	8
575	86804	Basidiomycota	Ustilaginomycetes	Ustilaginales	Ustilago trichophora	EnsemblFungi	13201	14
576	2012134	Mucoromycota	Endogonomycetes	Endogonales	Endogone sp. FLAS-F59071	EnsemblFungi	9491	13
577	1938954	Mucoromycota	Endogonomycetes	Endogonales	Bifiguratus adelaidae AZ0501	MycoCosm	5719	15
578	4871	Mucoromycota	Endogonomycetes	Endogonales	Endogone sp FLAS 59071	MycoCosm	9569	13
579	994334	Mucoromycota	Endogonomycetes	Endogonales	Jimgerdemannia flammicorona AD002	MycoCosm	13838	9
580	324621	Mucoromycota	Endogonomycetes	Endogonales	Jimgerdemannia lactiflua OSC166217	MycoCosm	12651	6
581	101091	Mucoromycota	Mucoromycetes	Mucorales	Choanephora cucurbitarum str. KUS-F28377	EnsemblFungi	11977	32
582	4829	Mucoromycota	Mucoromycetes	Mucorales	Absidia glauca	EnsemblFungi	14891	45
583	90262	Mucoromycota	Mucoromycetes	Mucorales	Absidia repens str. NRRL 1336	EnsemblFungi	14915	45
584	101127	Mucoromycota	Mucoromycetes	Mucorales	Hesseltinella vesiculosa str. NRRL 3301	EnsemblFungi	11139	26
585	42458	Mucoromycota	Mucoromycetes	Mucorales	Lichtheimia corymbifera JMRC:FSU:9682	EnsemblFungi	13404	38
586	688394	Mucoromycota	Mucoromycetes	Mucorales	Lichtheimia ramosa str. JMRC:FSU:6197	EnsemblFungi	11542	37
587	91626	Mucoromycota	Mucoromycetes	Mucorales	Mucor ambiguus str. NBRC 6742	EnsemblFungi	11343	36
588	36080	Mucoromycota	Mucoromycetes	Mucorales	Mucor circinelloides 1006PhL	EnsemblFungi	12227	34
589	29924	Mucoromycota	Mucoromycetes	Mucorales	Mucor lusitanicus CBS 277.49 - GCA_001638945.1	EnsemblFungi	11709	32
590	86630	Mucoromycota	Mucoromycetes	Mucorales	Rhizopus azygosporus	EnsemblFungi	15894	44
591	936053	Mucoromycota	Mucoromycetes	Mucorales	Rhizopus delemar RA 99-880	EnsemblFungi	17459	31
592	58291	Mucoromycota	Mucoromycetes	Mucorales	Rhizopus microsporus ATCC 52813	EnsemblFungi	10891	35
593	4846	Mucoromycota	Mucoromycetes	Mucorales	Rhizopus stolonifer	EnsemblFungi	13974	35
594	13706	Mucoromycota	Mucoromycetes	Mucorales	Syncephalastrum racemosum str. NRRL 2496	EnsemblFungi	11121	27
595	90261	Mucoromycota	Mucoromycetes	Mucorales	Absidia caerulea NRRL1315 v1.0	MycoCosm	13367	45
596	4828	Mucoromycota	Mucoromycetes	Mucorales	Absidia padenii NRRL 2977 v1.0	MycoCosm	13495	46
597	29923	Mucoromycota	Mucoromycetes	Mucorales	Amylomyces rouxii NRRL 5866 v1.0	MycoCosm	14619	36
598	64653	Mucoromycota	Mucoromycetes	Mucorales	Backusella circina FSU 941 v1.0	MycoCosm	17039	58
599	64654	Mucoromycota	Mucoromycetes	Mucorales	Backusella lamprospora NRRL 3300 v1.0	MycoCosm	15945	58
600	64631	Mucoromycota	Mucoromycetes	Mucorales	Benjaminiella poitrasii RSA 903 v1.0	MycoCosm	11659	33
601	4850	Mucoromycota	Mucoromycetes	Mucorales	Blakeslea trispora F921 v1.0	MycoCosm	11119	32
602	101089	Mucoromycota	Mucoromycetes	Mucorales	Chaetocladium brefeldii NRRL 2343 v1.0	MycoCosm	11585	27
603	101103	Mucoromycota	Mucoromycetes	Mucorales	Circinella umbellata NRRL1351 v1.0	MycoCosm	14693	33
604	90255	Mucoromycota	Mucoromycetes	Mucorales	Cokeromyces recurvatus NRRL 2243 v1.0	MycoCosm	10916	26
605	155726	Mucoromycota	Mucoromycetes	Mucorales	Cunninghamella blakesleeana CBS 133.27 v1.0	MycoCosm	10113	30
606	76405	Mucoromycota	Mucoromycetes	Mucorales	Cunninghamella echinulata NRRL 1382 v1.0	MycoCosm	10443	28
607	101130	Mucoromycota	Mucoromycetes	Mucorales	Dichotomocladium elegans RSA 919- v1.0	MycoCosm	12396	34
608	64645	Mucoromycota	Mucoromycetes	Mucorales	Dichotomocladium robustum RSA 2353+ v1.0	MycoCosm	12069	38
609	101134	Mucoromycota	Mucoromycetes	Mucorales	Ellisomyces anomalus CBS 243.57 v2.0	MycoCosm	12251	32
610	101136	Mucoromycota	Mucoromycetes	Mucorales	Fennellomyces linderi CBS 158.54 v1.0	MycoCosm	12952	34
611	1938713	Mucoromycota	Mucoromycetes	Mucorales	Fennellomyces sp. T-0311 v1.0	MycoCosm	14128	34
612	101096	Mucoromycota	Mucoromycetes	Mucorales	Gilbertella persicaria var. persicaria CBS 190.32-T v1.0	MycoCosm	10992	32
613	101105	Mucoromycota	Mucoromycetes	Mucorales	Gongronella butleri v1.0	MycoCosm	11004	26
614	101107	Mucoromycota	Mucoromycetes	Mucorales	Halteromyces radiatus CBS 162.75 v1.0	MycoCosm	10175	27
615	562976	Mucoromycota	Mucoromycetes	Mucorales	Helicostylum pulchrum RSA 2064 v1.0	MycoCosm	12794	34
616	565135	Mucoromycota	Mucoromycetes	Mucorales	Lentamyces parricidus NRRL2409 v1.0	MycoCosm	9633	28
617	36079	Mucoromycota	Mucoromycetes	Mucorales	Lentamyces zychae NRRL 2806 v1.0	MycoCosm	9378	25
618	420593	Mucoromycota	Mucoromycetes	Mucorales	Lichtheimia hyalospora v1.0	MycoCosm	12062	36
619	4830	Mucoromycota	Mucoromycetes	Mucorales	Mucor cordense RSA 1222 v1.0	MycoCosm	16794	64
620	444774	Mucoromycota	Mucoromycetes	Mucorales	Mucor endophyticus	MycoCosm	11445	18
621	708069	Mucoromycota	Mucoromycetes	Mucorales	Mucor fuscus	MycoCosm	12311	15
622	101122	Mucoromycota	Mucoromycetes	Mucorales	Mucor heterogamus NRRL 1489 v1.0	MycoCosm	14998	33
623	1091291	Mucoromycota	Mucoromycetes	Mucorales	Mucor lanceolatus	MycoCosm	10644	14
624	29922	Mucoromycota	Mucoromycetes	Mucorales	Mucor mucedo NRRL 3635 v1.0	MycoCosm	14052	32
625	105697	Mucoromycota	Mucoromycetes	Mucorales	Mucor piriformis NRRL 3318 v1.0	MycoCosm	11449	34
626	4841	Mucoromycota	Mucoromycetes	Mucorales	Mucor racemosus	MycoCosm	11269	19
627	64632	Mucoromycota	Mucoromycetes	Mucorales	Mycotypha africana NRRL 2978 v1.0	MycoCosm	10917	30
628	2053761	Mucoromycota	Mucoromycetes	Mucorales	Mycotypha indica IMI 211999 v1.0	MycoCosm	10509	28
629	35722	Mucoromycota	Mucoromycetes	Mucorales	Parasitella parasitica v1.0	MycoCosm	12306	33
630	60185	Mucoromycota	Mucoromycetes	Mucorales	Phascolomyces articulosus v1.0	MycoCosm	14495	32
631	4837	Mucoromycota	Mucoromycetes	Mucorales	Phycomyces blakesleeanus L51 v1.0	MycoCosm	12627	34
632	269771	Mucoromycota	Mucoromycetes	Mucorales	Phycomyces nitens S607 v1.0	MycoCosm	11669	33
633	64641	Mucoromycota	Mucoromycetes	Mucorales	Pilaira anomala RSA1997 v1.0	MycoCosm	12817	33
634	101123	Mucoromycota	Mucoromycetes	Mucorales	Pilobolus umbonatus NRRL 6349 v1.0	MycoCosm	10983	33
635	64574	Mucoromycota	Mucoromycetes	Mucorales	Radiomyces spectabilis NRRL 2753 v1.0	MycoCosm	10905	21
636	4840	Mucoromycota	Mucoromycetes	Mucorales	Rhizomucor pusillus CBS 18367	MycoCosm	10988	31
637	90258	Mucoromycota	Mucoromycetes	Mucorales	Saksenaea vasiformis B4078	MycoCosm	9387	26
638	101115	Mucoromycota	Mucoromycetes	Mucorales	Spinellus fusiger NRRL 22323 v1.0	MycoCosm	10164	26
639	101117	Mucoromycota	Mucoromycetes	Mucorales	Sporodiniella umbellata MES 1446 v1.0	MycoCosm	10781	39
640	101119	Mucoromycota	Mucoromycetes	Mucorales	Syzygites megalocarpus MES 1450 v1.0	MycoCosm	10698	36
641	101142	Mucoromycota	Mucoromycetes	Mucorales	Thamnidium elegans v1.0	MycoCosm	13104	35
642	64656	Mucoromycota	Mucoromycetes	Mucorales	Zychaea mexicana RSA 1403 v1.0	MycoCosm	14004	32
643	201725	Mucoromycota	Umbelopsidomycetes	Umbelopsidales	Umbelopsis angularis P8C34 v1.0	MycoCosm	9529	22
644	91625	Mucoromycota	Umbelopsidomycetes	Umbelopsidales	Umbelopsis isabellina AD026 v1.0	MycoCosm	9193	22
645	41833	Mucoromycota	Umbelopsidomycetes	Umbelopsidales	Umbelopsis ramanniana AG v1.0	MycoCosm	9931	19
646	1891170	Mucoromycota	Umbelopsidomycetes	Umbelopsidales	Umbelopsis sp. PMI123 v1.0	MycoCosm	9672	20
647	1891170	Mucoromycota	Umbelopsidomycetes	Umbelopsidales	Umbelopsis sp. nov. AD052 v1.0	MycoCosm	9369	21
648	64571	Mortierellomycota	Mortierellomycetes	Mortierellales	Lobosporangium transversale str. NRRL 3116	EnsemblFungi	11822	23
649	1343610	Mortierellomycota	Mortierellomycetes	Mortierellales	Actinomortierella ambigua BC1065	MycoCosm	9892	10
650	90253	Mortierellomycota	Mortierellomycetes	Mortierellales	Actinomortierella wolfii NRRL 66265	MycoCosm	8707	9
651	101101	Mortierellomycota	Mortierellomycetes	Mortierellales	Dissophora decumbens NRRL 22416 v1.0	MycoCosm	11886	19
652	979620	Mortierellomycota	Mortierellomycetes	Mortierellales	Dissophora ornata CBS 347.77 v1.0	MycoCosm	12584	19
653	979673	Mortierellomycota	Mortierellomycetes	Mortierellales	Entomortierella beljakovae KOD 1040	MycoCosm	11820	18
654	101097	Mortierellomycota	Mortierellomycetes	Mortierellales	Entomortierella chlamydospora AD033	MycoCosm	11098	20
655	743928	Mortierellomycota	Mortierellomycetes	Mortierellales	Entomortierella echinosphaera CBS 575.75 v1.0	MycoCosm	13087	20
656	979712	Mortierellomycota	Mortierellomycetes	Mortierellales	Entomortierella lignicola NRRL 2525	MycoCosm	10855	20
657	101098	Mortierellomycota	Mortierellomycetes	Mortierellales	Gamsiella multidivaricata NRRL 6456	MycoCosm	10546	18
658	979690	Mortierellomycota	Mortierellomycetes	Mortierellales	Gryganskiella cystojenkinii 1230	MycoCosm	12079	18
659	1897645	Mortierellomycota	Mortierellomycetes	Mortierellales	Haplosporangium bisporale NRRL A-12553	MycoCosm	13339	15
660	3125832	Mortierellomycota	Mortierellomycetes	Mortierellales	Haplosporangium sp. NRRL 3175	MycoCosm	10850	20
661	1897643	Mortierellomycota	Mortierellomycetes	Mortierellales	Linnemannia camargensis NRRL 2610	MycoCosm	11813	20
662	310910	Mortierellomycota	Mortierellomycetes	Mortierellales	Linnemannia elongata AD073 v1.0	MycoCosm	13851	19
663	604196	Mortierellomycota	Mortierellomycetes	Mortierellales	Linnemannia exigua NRRL 28262	MycoCosm	12120	17
664	64522	Mortierellomycota	Mortierellomycetes	Mortierellales	Linnemannia gamsii AD045	MycoCosm	12723	19
665	64567	Mortierellomycota	Mortierellomycetes	Mortierellales	Linnemannia schmuckeri NRRL 6426	MycoCosm	12060	18
666	979765	Mortierellomycota	Mortierellomycetes	Mortierellales	Linnemannia zychae NRRL 2592	MycoCosm	11284	19
667	979761	Mortierellomycota	Mortierellomycetes	Mortierellales	Lunasporangiospora selenospora KOD1015 v1.0	MycoCosm	13461	17
668	1440133	Mortierellomycota	Mortierellomycetes	Mortierellales	Modicella reniformis MES-2147	MycoCosm	12900	13
669	64518	Mortierellomycota	Mortierellomycetes	Mortierellales	Mortierella alpina 312A_T17_1 v1.0	MycoCosm	12295	21
670	4855	Mortierellomycota	Mortierellomycetes	Mortierellales	Mortierella ambigua NRRL 28271 v1.0	MycoCosm	10759	11
671	979670	Mortierellomycota	Mortierellomycetes	Mortierellales	Mortierella antarctica KOD 1229	MycoCosm	10312	16
672	4855	Mortierellomycota	Mortierellomycetes	Mortierellales	Mortierella capitata AV005 v1.0	MycoCosm	10395	10
673	1343614	Mortierellomycota	Mortierellomycetes	Mortierellales	Mortierella claussenii NRRL 2760	MycoCosm	10414	19
674	4855	Mortierellomycota	Mortierellomycetes	Mortierellales	Mortierella elongata AG-77 v2.0	MycoCosm	14969	19
675	4855	Mortierellomycota	Mortierellomycetes	Mortierellales	Mortierella gamsii AM1032 v1.0	MycoCosm	14981	22
676	4855	Mortierellomycota	Mortierellomycetes	Mortierellales	Mortierella globulifera AD054	MycoCosm	10364	19
677	4855	Mortierellomycota	Mortierellomycetes	Mortierellales	Mortierella humilis PMI_1414 v1.0	MycoCosm	12012	17
678	979708	Mortierellomycota	Mortierellomycetes	Mortierellales	Mortierella hygrophila NRRL 2591	MycoCosm	12256	21
679	4855	Mortierellomycota	Mortierellomycetes	Mortierellales	Mortierella minutissima AD051 v1.0	MycoCosm	13383	17
680	4855	Mortierellomycota	Mortierellomycetes	Mortierellales	Mortierella multidivaricata RSA 2152 T v1.0	MycoCosm	12248	18
681	41804	Mortierellomycota	Mortierellomycetes	Mortierellales	Mortierella polycephala KOD 948	MycoCosm	10186	16
682	1715235	Mortierellomycota	Mortierellomycetes	Mortierellales	Mortierella sp. 14UC	MycoCosm	11889	20
683	1715235	Mortierellomycota	Mortierellomycetes	Mortierellales	Mortierella sp. AD010	MycoCosm	11645	19
684	1715235	Mortierellomycota	Mortierellomycetes	Mortierellales	Mortierella sp. AD011	MycoCosm	11587	18
685	1715235	Mortierellomycota	Mortierellomycetes	Mortierellales	Mortierella sp. AD031	MycoCosm	12719	21
686	1715235	Mortierellomycota	Mortierellomycetes	Mortierellales	Mortierella sp. AD032	MycoCosm	12750	16
687	1715235	Mortierellomycota	Mortierellomycetes	Mortierellales	Mortierella sp. AD094	MycoCosm	12995	18
688	1715235	Mortierellomycota	Mortierellomycetes	Mortierellales	Mortierella sp. AD185 v1.0	MycoCosm	15422	19
689	1715235	Mortierellomycota	Mortierellomycetes	Mortierellales	Mortierella sp. AM989	MycoCosm	11516	18
690	1715235	Mortierellomycota	Mortierellomycetes	Mortierellales	Mortierella sp. BESC-360 v1.0	MycoCosm	11634	20
691	1715235	Mortierellomycota	Mortierellomycetes	Mortierellales	Mortierella sp. GBA30	MycoCosm	10471	19
692	1715235	Mortierellomycota	Mortierellomycetes	Mortierellales	Mortierella sp. GBA35	MycoCosm	12284	18
693	1715235	Mortierellomycota	Mortierellomycetes	Mortierellales	Mortierella sp. GBA39	MycoCosm	15194	19
694	1715235	Mortierellomycota	Mortierellomycetes	Mortierellales	Mortierella sp. GBA43	MycoCosm	11601	17
695	1715235	Mortierellomycota	Mortierellomycetes	Mortierellales	Mortierella sp. GBAus27b v1.0	MycoCosm	13953	18
696	1715235	Mortierellomycota	Mortierellomycetes	Mortierellales	Mortierella sp. KOD 1030	MycoCosm	11804	14
697	1715235	Mortierellomycota	Mortierellomycetes	Mortierellales	Mortierella sp. NVP41	MycoCosm	12544	21
698	1715235	Mortierellomycota	Mortierellomycetes	Mortierellales	Mortierella sp. NVP85	MycoCosm	12136	19
699	4855	Mortierellomycota	Mortierellomycetes	Mortierellales	Mortierella verticillata NRRL 6337	MycoCosm	12569	20
700	4855	Mortierellomycota	Mortierellomycetes	Mortierellales	Mortierella wolfii NRRL 6351 v1.0	MycoCosm	10038	11
701	979688	Mortierellomycota	Mortierellomycetes	Mortierellales	Podila clonocystis AM1000	MycoCosm	11687	17
702	979697	Mortierellomycota	Mortierellomycetes	Mortierellales	Podila epicladia AD058	MycoCosm	11811	18
703	979699	Mortierellomycota	Mortierellomycetes	Mortierellales	Podila epigama NRRL 5512	MycoCosm	10351	15
704	311239	Mortierellomycota	Mortierellomycetes	Mortierellales	Podila horticola AD009	MycoCosm	12003	17
705	64523	Mortierellomycota	Mortierellomycetes	Mortierellales	Podila humilis KOD 1050	MycoCosm	8465	12
706	64525	Mortierellomycota	Mortierellomycetes	Mortierellales	Podila minutissima AD069	MycoCosm	11885	18
707	78898	Mortierellomycota	Mortierellomycetes	Mortierellales	Podila verticillata AD079	MycoCosm	12117	18
708	1286916	Zoopagomycota	Zoopagomycetes	Zoopagales	Piptocephalis tieghemiana RSA 1565 v1.0	MycoCosm	5811	9
709	1851187	Zoopagomycota	Zoopagomycetes	Zoopagales	Syncephalis fuscata S228 v1.0	MycoCosm	8846	9
710	1851185	Zoopagomycota	Zoopagomycetes	Zoopagales	Syncephalis plumigaleata NRRL S24 v1.0	MycoCosm	8130	9
711	1712513	Zoopagomycota	Zoopagomycetes	Zoopagales	Syncephalis pseudoplumigaleata Benny S71-1 single-cell v1.0	MycoCosm	6123	5
712	78915	Zoopagomycota	Zoopagomycetes	Zoopagales	Thamnocephalis sphaerospora RSA 1356 single-cell v1.0	MycoCosm	6857	6
713	215637	Kickxellomycota	Dimargaritomycetes	Dimargaritales	Dimargaris cristalligena RSA 468 single-cell v1.0	MycoCosm	7456	10
714	133412	Kickxellomycota	Harpellomycetes	Harpellales	Smittium culicis GSMNP	MycoCosm	12166	13
715	133383	Kickxellomycota	Harpellomycetes	Harpellales	Smittium mucronatum ALG-7-W6	MycoCosm	8247	10
716	1213189	Kickxellomycota	Harpellomycetes	Harpellales	Zancudomyces culisetae COL-18-3	MycoCosm	8067	9
717	304332	Kickxellomycota	incertae sedis	Ramicandelaberales	Ramicandelaber brevisporus CBS 109374 v1.0	MycoCosm	9281	8
718	4864	Kickxellomycota	Kickxellomycetes	Kickxellales	Coemansia mojavensis RSA 71 v1.0	MycoCosm	6859	8
719	61392	Kickxellomycota	Kickxellomycetes	Kickxellales	Coemansia reversa NRRL 1564 v1.0	MycoCosm	7347	12
720	417178	Kickxellomycota	Kickxellomycetes	Kickxellales	Coemansia spiralis RSA 1278 v1.0	MycoCosm	7247	10
721	61397	Kickxellomycota	Kickxellomycetes	Kickxellales	Kickxella alabastrina RSA 675 v1.0	MycoCosm	7475	8
722	61395	Kickxellomycota	Kickxellomycetes	Kickxellales	Linderina pennispora ATCC 12442 v1.0	MycoCosm	9351	14
723	61414	Kickxellomycota	Kickxellomycetes	Kickxellales	Martensiomyces pterosporus CBS 209.56 v1.0	MycoCosm	8435	11
724	417174	Kickxellomycota	Kickxellomycetes	Kickxellales	Pinnaticoemansia coranantispora CBS 131509 T v1.0	MycoCosm	7973	11
725	68401	Kickxellomycota	Kickxellomycetes	Kickxellales	Spiromyces aspiralis RSA 2271 v1.0	MycoCosm	6890	8
726	34488	Entomophthoromycota	Entomophthoromycetes	Entomophthorales	Conidiobolus coronatus NRRL 28638	EnsemblFungi	10572	17
727	34487	Entomophthoromycota	Entomophthoromycetes	Entomophthorales	Conidiobolus thromboides FSU 785 v1.0	MycoCosm	8867	8
728	42810	Entomophthoromycota	Entomophthoromycetes	Entomophthorales	Entomophaga maimaiga ARSEF 7190 v1.0	MycoCosm	14701	10
729	42210	Entomophthoromycota	Entomophthoromycetes	Entomophthorales	Zoophthora radicans ATCC 208865 v1.0	MycoCosm	14479	14
730	28583	Blastocladiomycota	Blastocladiomycetes	Blastocladiales	Allomyces macrogynus ATCC 38327	EnsemblFungi	19447	24
731	64508	Blastocladiomycota	Blastocladiomycetes	Blastocladiales	Blastocladiella britannica v1.0	MycoCosm	9431	8
732	109876	Blastocladiomycota	Blastocladiomycetes	Blastocladiales	Catenaria anguillulae PL171 v2.0	MycoCosm	12804	10
733	1500003	Blastocladiomycota	Physodermatomycetes	Physodermatales	Paraphysoderma sedebokerense JEL821 v1.0	MycoCosm	10859	8
734	1555241	Chytridiomycota	Chytridiomycetes	Caulochytriales	Caulochytrium protostelioides ATCC 52028 v1.0	MycoCosm	6168	5
735	329046	Chytridiomycota	Chytridiomycetes	Chytridiales	Rhizoclosmatium globosum str. JEL800	EnsemblFungi	16987	20
736	64509	Chytridiomycota	Chytridiomycetes	Chytridiales	Chytridium lagenaria Arg66 v1.0	MycoCosm	14275	18
737	4814	Chytridiomycota	Chytridiomycetes	Chytridiales	Chytriomyces hyalinus JEL632 v1.0	MycoCosm	15516	25
738	2012326	Chytridiomycota	Chytridiomycetes	Chytridiales	Chytriomyces sp. MP 71 v1.0	MycoCosm	16054	22
739	281842	Chytridiomycota	Chytridiomycetes	Chytridiales	Entophlyctis helioformis JEL805 v1.0	MycoCosm	10118	10
740	109932	Chytridiomycota	Chytridiomycetes	Chytridiales	Entophlyctis luteolus JEL0129 v1.0	MycoCosm	12279	47
741	110081	Chytridiomycota	Chytridiomycetes	Chytridiales	Obelidium mucronatum JEL802 v1.0	MycoCosm	15468	32
742	109935	Chytridiomycota	Chytridiomycetes	Cladochytriales	Cladochytrium polystomum WB228 v1.0	MycoCosm	16599	20
743	109936	Chytridiomycota	Chytridiomycetes	Cladochytriales	Cladochytrium replicatum JEL 714 v1.0	MycoCosm	16307	18
744	388810	Chytridiomycota	Chytridiomycetes	incertae sedis	Blyttiomyces helicus single-cell v1.0	MycoCosm	12167	9
745	110093	Chytridiomycota	Chytridiomycetes	Polychytriales	Polychytrium aggregatum JEL109 v1.0	MycoCosm	10690	11
746	1357716	Chytridiomycota	Chytridiomycetes	Rhizophydiales	Batrachochytrium salamandrivorans BS	MycoCosm	12471	10
747	382532	Chytridiomycota	Chytridiomycetes	Rhizophydiales	Globomyces pollinis-pini Arg68 v1.0	MycoCosm	11537	11
748	382530	Chytridiomycota	Chytridiomycetes	Rhizophydiales	Gorgonomyces haynaldii MP57 v1.0	MycoCosm	7898	9
749	1142505	Chytridiomycota	Chytridiomycetes	Rhizophydiales	Homolaphlyctis polyrhiza JEL142 v1.0	MycoCosm	7123	4
750	1396493	Chytridiomycota	Chytridiomycetes	Spizellomycetales	Fimicolochytrium jonesii JEL569 v1.0	MycoCosm	10067	10
751	109897	Chytridiomycota	Chytridiomycetes	Spizellomycetales	Gaertneriomyces semiglobifer Barr 43 v1.0	MycoCosm	8714	9
752	109894	Chytridiomycota	Chytridiomycetes	Spizellomycetales	Geranomyces variabilis JEL559 v1.0	MycoCosm	9411	11
753	109895	Chytridiomycota	Chytridiomycetes	Spizellomycetales	Powellomyces hirtus BR81 v1.0	MycoCosm	9359	12
754	109760	Chytridiomycota	Chytridiomycetes	Spizellomycetales	Spizellomyces punctatus DAOM BR117	MycoCosm	9424	19
755	324629	Chytridiomycota	Chytridiomycetes	Spizellomycetales	Triparticalcar arcticum BR59 v1.0	MycoCosm	10963	13
756	286115	Chytridiomycota	Chytridiomycetes	Synchytriales	Synchytrium endobioticum str. LEV6574	EnsemblFungi	8671	9
757	1806994	Chytridiomycota	Chytridiomycetes	Synchytriales	Synchytrium microbalum str. JEL517	EnsemblFungi	6308	2
758	1123529	Chytridiomycota	Monoblepharidomycetes	Monoblepharidales	Gonapodya prolifera v1.0	MycoCosm	13902	12
759	82268	Chytridiomycota	Monoblepharidomycetes	Monoblepharidales	Hyaloraphidium curvatum SAG235-1 v1.0	MycoCosm	15197	12
760	1754192	Neocallimastigomycota	Neocallimastigomycetes	Neocallimastigales	Anaeromyces robustus str. S4	EnsemblFungi	12833	11
761	1754190	Neocallimastigomycota	Neocallimastigomycetes	Neocallimastigales	Neocallimastix californiae str. G1	EnsemblFungi	20214	19
762	1754191	Neocallimastigomycota	Neocallimastigomycetes	Neocallimastigales	Piromyces finnis	EnsemblFungi	10978	12
763	2019372	Neocallimastigomycota	Neocallimastigomycetes	Neocallimastigales	Caecomyces churrovis A v1.0	MycoCosm	15009	11
764	1764037	Neocallimastigomycota	Neocallimastigomycetes	Neocallimastigales	Neocallimastix cameroonii var. constans G3 v1.0	MycoCosm	23663	21
765	2767002	Neocallimastigomycota	Neocallimastigomycetes	Neocallimastigales	Neocallimastix lanati v1.0	MycoCosm	27677	22
766	2230904	Neocallimastigomycota	Neocallimastigomycetes	Neocallimastigales	Neocallimastix sp. Gf-Ma3-1 v1.0	MycoCosm	28646	21
767	2230904	Neocallimastigomycota	Neocallimastigomycetes	Neocallimastigales	Neocallimastix sp. WI3-B v1.0	MycoCosm	28960	23
768	2002773	Neocallimastigomycota	Neocallimastigomycetes	Neocallimastigales	Orpinomyces sp.	MycoCosm	18936	7
769	2048554	Neocallimastigomycota	Neocallimastigomycetes	Neocallimastigales	Pecoramyces sp. F1	MycoCosm	17740	12
770	45796	Neocallimastigomycota	Neocallimastigomycetes	Neocallimastigales	Piromyces sp. E2 v1.0	MycoCosm	14648	9
771	45796	Neocallimastigomycota	Neocallimastigomycetes	Neocallimastigales	Piromyces sp. UH3-1 v2.0	MycoCosm	16867	11
772	1866961	Rozellomycota	Microsporidia	incertae sedis	Amphiamblys sp. WSBS2006	MycoCosm	3642	1
773	278021	Rozellomycota	Microsporidia	incertae sedis	Antonospora locustae HM-2013	MycoCosm	2606	2
774	70536	Rozellomycota	Microsporidia	incertae sedis	Edhazardia aedis USNM 41457	MycoCosm	4190	4
775	6035	Rozellomycota	Microsporidia	incertae sedis	Encephalitozoon cuniculi GB-M1	MycoCosm	1996	2
776	27973	Rozellomycota	Microsporidia	incertae sedis	Encephalitozoon hellem ATCC 50504	MycoCosm	1847	2
777	58839	Rozellomycota	Microsporidia	incertae sedis	Encephalitozoon intestinalis ATCC 50506	MycoCosm	1833	2
778	571949	Rozellomycota	Microsporidia	incertae sedis	Encephalitozoon romaleae SJ-2008	MycoCosm	1831	2
779	31281	Rozellomycota	Microsporidia	incertae sedis	Enterocytozoon bieneusi H348	MycoCosm	3632	1
780	27971	Rozellomycota	Microsporidia	incertae sedis	Enterocytozoon hepatopenaei TH1	MycoCosm	2536	2
781	1081671	Rozellomycota	Microsporidia	incertae sedis	Enterospora canceri GB1	MycoCosm	2169	2
782	1081669	Rozellomycota	Microsporidia	incertae sedis	Hepatospora eriocheir GB1	MycoCosm	2691	1
783	1485682	Rozellomycota	Microsporidia	incertae sedis	Mitosporidium daphniae UGP3	MycoCosm	3330	1
784	1805483	Rozellomycota	Microsporidia	incertae sedis	Nematocida displodere JUm2807	MycoCosm	2278	4
785	586133	Rozellomycota	Microsporidia	incertae sedis	Nematocida parisii ERTm1	MycoCosm	2661	4
786	27977	Rozellomycota	Microsporidia	incertae sedis	Nosema apis BRL 01	MycoCosm	2764	2
787	27978	Rozellomycota	Microsporidia	incertae sedis	Nosema bombycis CQ1	MycoCosm	4468	1
788	27977	Rozellomycota	Microsporidia	incertae sedis	Nosema ceranae BRL01	MycoCosm	2060	2
789	174685	Rozellomycota	Microsporidia	incertae sedis	Ordospora colligata OC4	MycoCosm	1820	2
790	3039483	Rozellomycota	Microsporidia	incertae sedis	Ordospora pajunii v1.0	MycoCosm	1602	2
791	146866	Rozellomycota	Microsporidia	incertae sedis	Pseudoloma neurophilia MK1	MycoCosm	3644	2
792	51541	Rozellomycota	Microsporidia	incertae sedis	Spraguea lophii 42 110	MycoCosm	2499	5
793	72359	Rozellomycota	Microsporidia	incertae sedis	Trachipleistophora hominis	MycoCosm	3212	2
794	103449	Rozellomycota	Microsporidia	incertae sedis	Vavraia culicis subsp. floridensis	MycoCosm	2773	4
795	42399	Rozellomycota	Microsporidia	incertae sedis	Vittaforma corneae ATCC 50505	MycoCosm	2238	2
796	281847	Rozellomycota	Rozellomycetes	Rozellales	Rozella allomycis CSF55	EnsemblFungi	6350	3

## Sheet: Supplementary Table 2
Supplementary Table 2. Detailed information on 7,846 fungal GATA TFs
Taxonomic Information								Physicochemical Properties								Domain List (by Pfam)							GATA Motifs
No.	Source	Division	Class	Order	Species	GATA name	Protein name	Protein Seq	Protein Len	MW (kDa)	pI	Aliphatic Index	GRAVY	TMHMM	SubLoc	# of domains	domain name	Domain description	Domain seq	Start	End	E-value	# of GATA moitfs	Motif seq	Motif types
1	EnsemblFungi	Ascomycota	Dothideomycetes	Botryosphaeriales	Aplosporella prunicola CBS 121167	Apru1	KAF2135240	MSARLSRKQSTSSDNHSRPRPAQPSAPSGIAQLRSQSADKQAQHDLDAAKAADPMNLDDFIVPSSVASPAGISHSPVATDDLTSATAPAIPIRKQTQLDDGSLHISRASAPSVPPALGRDNEFGYVQRHVRKTSIDERRPPKRKPDASPQVPALNSIVIPHDPDAEASFHSYSLDQPQQAHQSFDHASQSTHSQISFNLNTFDIDDPIINSAGPFQNNFTFSPVGSPMIHNNQGPYSSMFNPHSMASSLNSTDYYNSPPASAYPSTVSTPQPIPEGNEQMYFDRSSGVDIRGRMGGYMPQQSSLSSSMQPSFMFNPTAHDSIFGAVSSSSAGPPPPFSSHSYHQSGHVDPNSVIHPTFPQATRSPSMDMSRHENIFQFGADSDNEEDEGGAFPDRTLPI…	789	83.5429	8.847	49.33	-0.755	0(N)	Nucleus	1	PF00320	GATA zinc finger	CTNCFTQTTPLWRRNPEGHPLCNACGLFLKLHGV	549	582	6e-13	1	CTNCFTQTTPLWRRNPEGHPLCNAC	Type IVa
2	EnsemblFungi	Ascomycota	Dothideomycetes	Botryosphaeriales	Aplosporella prunicola CBS 121167	Apru2	KAF2135842	MEPFPSGGDANNNNNNNNNNNNNNNNDTTTTASSGHHHHNYHDASVQHLPIPQTVTGSGANVARRLDWARIIQASFRDIHYVLAPNTRILHVTPSSAGLVGFSPAELVGLLLSELVHPDDAQLFARELAEARQQCAQQHYQQHQRQQSFRFFVRLQLRLSHDDDGVATAFDPAYPYQQLPVVSAAIKESHYAVFEACGHYQPPAPLAAGSLVAGTLLPPSLTTTPPSVSPTAFVAARAGGLFFLVARPYPSRQGRLLDDFLGLQIEHAQLRRQRAELVQEEEGDGDGDGAGVDVSARVGADADADAALSPLRAAGIVGAGAGAGAASASLSPPPSLSSGTTAASSGAGHSTPRSIASGSIAGSSGTGTATATATVKAGTAAGPASGSDKVVIRAGDVGI…	564	56.8478	6.347	69.75	-0.284	0(N)	Nucleus	1	PF00320	GATA zinc finger	CVWCNTTDAPEWRRGPGGPKTLCNACGLRWAKARK	422	456	9.4e-10	1	CVWCNTTDAPEWRRGPGGPKTLCNAC	Type IVb
3	EnsemblFungi	Ascomycota	Dothideomycetes	Botryosphaeriales	Aplosporella prunicola CBS 121167	Apru3	KAF2135849	MPRALPLPLPLLQTPTTQQRLAAHAAACTGVFFVSAQPYPSSPGAALDRFLGLRIERAMLERERARLRAEGAADEEEEGDEAFEEERDGEGGDDGEEGALVVMRMGDAGIPFVVRRPVNETAARKRKREGLPEEFVCQWCDVTSAPEWRRGPGGPKTLCNACGLRWAKAGRKKNHGSIKMEEDEDGGNSAAAAAAAAAAFMAVAPALPRTVAVPPAGAGRTAKKSVCVVA	230	24.3884	5.884	68.96	-0.367	0(N)	Nucleus	1	PF00320	GATA zinc finger	CQWCDVTSAPEWRRGPGGPKTLCNACGLRWAKAGRK	137	172	4.9e-10	1	CQWCDVTSAPEWRRGPGGPKTLCNAC	Type IVb
4	EnsemblFungi	Ascomycota	Dothideomycetes	Botryosphaeriales	Aplosporella prunicola CBS 121167	Apru4	KAF2135857	MRRPHLPHRGARPICQNCTTSTTPLWRRDEVGSVLCNACGLFLKLHGRPRPISLKTDVIKSRNRVKTSGQAPKKKPPPHSHPDHNGLDHMRAQAGTPPIDALNHRRTSQKMSSAASERSASPLSRTGTPGLHHPSNIAPQHMFDGVTLNGHEFHSSSLPAFALHHRQPSPSASSINGAHLEPPMTYDGLANTNTSLKTRVSELEVINDLFRGRVAELEQSEQRARTDETLARDAENRLRAGLEQSQAREADLKRRIEELEAELSEYRDGPRQKKMRLSDIVDESAASTPLSTPSQSN	297	32.8734	9.683	65.79	-0.874	0(N)	Nucleus	2	PF00320;PF25026	GATA zinc finger;Asd-4-like domain	CQNCTTSTTPLWRRDEVGSVLCNACGLFLKLHGR;TYDGLANTNTSLKTRVSELEVINDLFRGRVAELEQSEQRARTDETLARDAENRLRAGLEQSQAREADLKRRIEELEAEL	15;185	48;263	9.4e-12;3.3e-28	1	CQNCTTSTTPLWRRDEVGSVLCNAC	Type IVa
5	EnsemblFungi	Ascomycota	Dothideomycetes	Botryosphaeriales	Aplosporella prunicola CBS 121167	Apru5	KAF2139837	MYQNGGAMPEVDGMIGMPMNLSMDQTGDLMTGLDIDMLPGDLDLSLNNAEADVQTQSLYNTPIAAQPQRTPSTPADAPDAYALTTNVQNNFPMSGVGAGPLPTGFGMQNTNTSGSTLTEFTKRRNWSQRIIEELRDFLHILTPDGRILYVSPSCKALTGWEQSQLVGRTVVEFIHSDDSGIFIREFNESVASHNPLRFFYRFRKADGTYIIFESHGHPHYDQPNPAFGGNDTAFMICRGFFLMARPYPIKNTSLLDSFLEHKIENERLTRRIAELKKEETEEQEAQDRQWAKKTDGQGSVTPSDSQMGGTSPAPASAYSGMPPPARPSLSNIALTRQNLDEALAASRPDSITDKMARYEGATHIDTIEMLTGLRYRDGERSQGISTGDTSPALIRGDAG…	489	53.5744	5.597	63.93	-0.621	0(N)	Nucleus	2	PF08447;PF00320	PAS fold;GATA zinc finger	ILYVSPSCKALTGWEQSQLVGRTVVEFIHSDDSGIFIREFNESVASHNPLRFFYRFRKADGTYIIFESHGHPHYDQ;CTDCGTLDSPEWRKGPNGPKTLCNACGLRWAKKEKK	147;426	222;461	3.9e-09;1.6e-11	1	CTDCGTLDSPEWRKGPNGPKTLCNAC	Type IVb
6	EnsemblFungi	Ascomycota	Dothideomycetes	Botryosphaeriales	Aplosporella prunicola CBS 121167	Apru6	KAF2140580	METMDAGSRQSAVLPSISSIDAESRRDESDYQRKQSAAAMISPSFPFSCPPPPYAHHTPTASAPPAGLASLISPPESRRTSGEEREHKQPARQSLPSIHEALASDQPMPYPPSQTPAAPTSAAQYGPPPPPAAAIPHPDAARRHYSQDMPSRDSPGLYSQPAPRSPYMKPPFAQNQPEPPRPTLPNSHNPKLPTLHPLRTEQPPVENPRSSFSYGYTQAPSPGYQPQSAGAMQQQPFGYSTYPAAVPYPYSAAPPPPHAPGPAYPASASAYSAQGGYPPSWRSDGAEVRRAEESKRAGRNAGPALYGESVKRHLDNFDFEASLNEIAEGSGRLNEFVRVYGQRAHQAQRVGPVPGSTPTIHEVDDLMKQGHRILDSLVRIQEVVRTQQVHMAEQVHDPR…	502	54.1185	9.104	46.83	-0.902	0(N)	Nucleus	1	PF00320	GATA zinc finger	CHSCNRAETPEWRRGPDGARTLCNACGLHYAKL	442	474	1.9e-10	1	CHSCNRAETPEWRRGPDGARTLCNAC	Type IVb
7	EnsemblFungi	Ascomycota	Dothideomycetes	Botryosphaeriales	Aplosporella prunicola CBS 121167	Apru7	KAF2143750	MSASTQLHLRNDPSAEASLKTTPLLRQPSKEEVEFAQNLSLLQHAQDQPQPARDSHHPPPEVTVERPSSGGKPADTSEHHSLEDIQHFQANANQSSNTPQPRTLSPSPGATSSPRAQVSNAPMNGQTCSNCGTTRTPLWRRSPSGEPICNACGLYLKARNQSRPSNLKRNLSQAPTMSVQPGQCSSEAHGRSQSPSGYPGAAQSAYVTADQVTSGTCPGGGRCNGTGGQQGCNGCPAYNNRVSKTAQYALAHVSDGNAQPANPSSQADGGHAAPGSQQHLATPAGASVVPACQNCRTTVTPLWRRDELGHTICNACGLYYKLHGVHRPVQMKKQEIKRRKRVVPAAPSESANHLFAQHPPAHYQQQHLQHASQQQARSPSQSSVSPSATQESFSDKPEY…	590	62.7361	8.192	52.56	-0.856	0(N)	Nucleus	2	PF00320;PF00320	GATA zinc finger;GATA zinc finger	CSNCGTTRTPLWRRSPSGEPICNACGLYLKARN;CQNCRTTVTPLWRRDELGHTICNACGLYYKLHGV	128;292	160;325	3.8e-11;2.1e-11	2	CSNCGTTRTPLWRRSPSGEPICNAC;CQNCRTTVTPLWRRDELGHTICNAC	Type IVa;Type IVa
8	EnsemblFungi	Ascomycota	Dothideomycetes	Botryosphaeriales	Aplosporella prunicola CBS 121167	Apru8	KAF2144580	MNGYYPLDQGAAGDGMMGIMGQDASASSMIGAQSLDDIVHQNAKAMRRQSVPMHYGTSRDMDGDMRRVSMMEFSGASPGQLDQFQFDPTTAAPSVDSMMRMGDAYDQRAPSFSGRRRPSTGDLNIDTRYANQAQSYAPMTHPHSAFASPLDMANAYVTSGMPMPMAMADPSLNGLLPPEAAPMNMFSGAQFTSPLMGSPVTADFNDTLHIGPLQDPGSGQGSMDINVGSDTASQSVTTPTDMLASRGGSREQSVHSNRQQSSSMSQAPLQQSTTPTSNAPSQSKNVSFGPEPPQRNMGTTRGPNGQTFPWKTPEGGFPSTMTNRPHMEGQFKNVYSSTGFDMLGVLMRVATRPNPEINIGSVDLSCAFVVCDAEKDDNPIVYCSENFERLTGYTKHMIL…	1042	113.922	7.95	63.85	-0.568	0(N)	Nucleus	3	PF13426;PF08447;PF00320	PAS domain;PAS fold;GATA zinc finger	FVVCDAEKDDNPIVYCSENFERLTGYTKHMILGRNCRFLQSPDGKVESGIKRKYVDDESVLYLKNQINAQREAQISLINYRRGGQPFMNLLTMIPITWDDTEVVKFIVGFQVDL;LYSSPSAAKVLEYEASELVGTALSSVCHPSDIVPVTRELKDTSTGSTVNIVFRIRRKHSGYMWFEGHGSLHTEQGK;CANCHTRVTPEWRRGPSGNRDLCNSCGLRWAKQN	368;573;924	481;648;957	7.1e-13;2.8e-06;1.7e-10	1	CANCHTRVTPEWRRGPSGNRDLCNSC	Type IVb
9	EnsemblFungi	Ascomycota	Dothideomycetes	Botryosphaeriales	Diplodia corticola str. CBS 112549	Dcor1	OJD28815	MPSPEHSTLDSAVVDAPSPTAVLRTDLDALLPPTLDDIVLSSLHHLHFVLSPSTTILRVSANCLNLLGCEPNLLLGQRLAALIHKDDAHVFSSEIDDALLRPTNTFDASLAAFAPGRPPFRFYCRIRSVVHIGSDYSAFELVGHYQVKMPASLSPLQLMMPPPGIISITARPAFTRKGRLMDGMLELKMEQIHLVALLREMRREAAGEGRHHEADVRHAGRGRGRDGVDGDDGGGGDGDDDEGTVVAVSSAATPMHHSLRNAEETLYWRPERRTSPPGRPLKRSRSSPPRLTWMTSATDPVPAPAPAPTPKEEQHTQTPGHRHDPGGSPPDGQSGGEGSPGESSKVKLGDAGIPFFIRPEGYERKISDVPRQPKRKFAAKDHCCSRCGTVESPEWRAGP…	431	46.6212	7.016	72.04	-0.515	0(N)	Nucleus	1	PF00320	GATA zinc finger	CSRCGTVESPEWRAGPDGPKTLCNACGLKYAKEQ	384	417	1.1e-10	1	CSRCGTVESPEWRAGPDGPKTLCNAC	Type IVb
10	EnsemblFungi	Ascomycota	Dothideomycetes	Botryosphaeriales	Diplodia corticola str. CBS 112549	Dcor2	OJD32220	MPDARACTRFPPTANTASTLAISLLNRPVAIENLHYHNRPPSPRDLAPFNTASSLDERPSLPSIGLTISRPSSAASQSGARLPPPQPLHRGTSPGIQLPGVSSLASLAASSTSSPRPDNRPPNAVSHSMTYATSAPATSGGQNPPICQNCTTSTTPLWRRDEVGSVLCNACGLFLKLHGRPRPISLKTDVIKSRNRVKTSGQGPKKKQHDNGLDQVRAAAGTPPVDALSNHRRAQKVSSGASERSTSPLSRTGTPNLGHHHPSNIAPQHMFDGVTLNGHEFHSPSLPSFMPHRQPSPSASSVNGSHLEPPMSYDGLATTNTALKTRVSELEVINDLFRGRVTELEQSEQRARQNEAHARDHEKLLQQDLDDSHAREADLKRRVDELEAELAEYRGDGPR…	425	45.7994	9.415	66.42	-0.735	0(N)	Cytoplasm|Nucleus	2	PF00320;PF25026	GATA zinc finger;Asd-4-like domain	CQNCTTSTTPLWRRDEVGSVLCNACGLFLKLHGR;SYDGLATTNTALKTRVSELEVINDLFRGRVTELEQSEQRARQNEAHARDHEKLLQQDLDDSHAREADLKRRVDELEAEL	147;312	180;390	1.5e-11;2.5e-28	1	CQNCTTSTTPLWRRDEVGSVLCNAC	Type IVa
11	EnsemblFungi	Ascomycota	Dothideomycetes	Botryosphaeriales	Diplodia corticola str. CBS 112549	Dcor3	OJD33269	MEAMEAGSRQSAILPSISSIDAEKSRRDDTDFQRKHSAAAMVSPSFPYSNPPYATHHPPAASAPPASLAGLISPPESRRTSGDEKEQKPPTRQSLPSIHEALASEQPMPYPPHPTSTGPPPASQYFQPPPTSATSHPDSARRHFSQDFSSRDSPALYSQHPDRSPYMKPPPQPPYSQAAQDPPRPTLPTTHNPKLPTLHPLRTEPSPVNNSRPSFSAGYAYSQQQSPAYEQNPQQAGPVQPQQQPFGFNHPYAPGPYPYSAPPPPPPPSQVNPPYPPSAPAAYSASGGYPPTWRSDGAEVRRAEESKRAGRHAGPALYGESVKRHLDNFDFEASLNEIAEGSGRLNEFLRIHGQRAHQAQRAGPLPGSMPLIHEVDDLMKSSQRIVDSLARIREVVLTT…	517	55.9382	9.154	45.86	-0.983	0(N)	Nucleus	1	PF00320	GATA zinc finger	CHSCNRAETPELRRGPDGARTLCNACGLHYAKL	457	489	4.3e-09	1	CHSCNRAETPELRRGPDGARTLCNAC	Type IVb
12	EnsemblFungi	Ascomycota	Dothideomycetes	Botryosphaeriales	Diplodia corticola str. CBS 112549	Dcor4	OJD34431	MAGGPPGMVQMPPFVDQNGLLDGMDVNMLSMDLDLGAMGPDRDAPTQSYNTPIAAQPPHSQSTPADSHDAFAVQPTVSTSYSMSGIGAGPLPTGFGMPSQNPSGSTLTEFTKRRNWSQRVIEELRDLLHILTPDGRIVYVSPSCKALTGWEPQQLVGRIVTDFIHGDDSGIFIREFNESIASQNALRFFYRFRKADGSYVIFESHGHGHFDQQAPRFAGSSSFAFCRGFFMMARPYPIKNTSLLDSFLEHKIENERLTKRVAELKREEQEEQEAQDRHWIKKQETPGSVTPSATDATKTGNETPMSNSGGMPPPPRPGVSNAALTRQNLDEVLAASKPDSINDKMARYEGATHIDTIEMLTGLRYRDGERSQGISTGDTSPALIRGDAGIAILVDKDNR…	475	51.8786	6.287	61.45	-0.635	0(N)	Nucleus	2	PF08447;PF00320	PAS fold;GATA zinc finger	IVYVSPSCKALTGWEPQQLVGRIVTDFIHGDDSGIFIREFNESIASQNALRFFYRFRKADGSYVIFESHGHGHFDQQ;CTDCGTLDSPEWRKGPNGPKTLCNACGLRWAKKEKK	137;416	213;451	1e-09;1.5e-11	1	CTDCGTLDSPEWRKGPNGPKTLCNAC	Type IVb
13	EnsemblFungi	Ascomycota	Dothideomycetes	Botryosphaeriales	Diplodia corticola str. CBS 112549	Dcor5	OJD35570	MDPSYPDPGRPLEDAAAVLAAASITEASASASRHHWGASAARRTKPAATWTHISAAVLESLRDLHYVLSLCGTIQHVSPNSPALLGYGPEDLVGTVLVDHVHEDDAPVYRDELREASSTGRPFRFYCRIRSRVNTVGAGTNADTALFPSGFADQHLTSSPSFSVFEITGRFHEVASPGPIPVGIGITATPPNDDGLFVLMARPYPLAQGTKLDSFLFLKIENERLTAQLAALKAEQQDNENDADSEECDGYQTRQYSMAAPTAAFATTAMRRPSDGFPWFDVQPSNVTLTTGSASSAQESVFSGSGSSMFGPASSSSTNTSASVIVPSLSSPCPRSVAGNNNKPPPALLSRTFSTTAVPGTIAATTNRSSSSNNNKKNNISINNISTNNRSPPKNTPTV…	512	53.1012	8.07	62.97	-0.354	0(N)	Nucleus	1	PF00320	GATA zinc finger	CAWCSATSSPEWRKGPAGPKSLCNACGLRYAKFRR	432	466	2.3e-10	1	CAWCSATSSPEWRKGPAGPKSLCNAC	Type IVb
14	EnsemblFungi	Ascomycota	Dothideomycetes	Botryosphaeriales	Diplodia corticola str. CBS 112549	Dcor6	OJD35625	MSDAQHGERGGGMHASPLSADFDNDAIGAMTDLHSFHTSSSPRHVRFPQGHRDDVSGTSSAVQSLTSASTLDSSKLDLSPSDSVAREGMLRDTFFPRLQNDAVAHLDDPDEMQKKDPIGTQIWKLYNKQKSQLPNSERMENLTWRMMSMNLRKMRRQSAQLSHKPTNDDKRASSRPTTAPSGIAQLRSLSQDKQAHHDLEASRAEPMNLDDFIVPSSVASPAGVPHSPSASDDQPSLTNATAPAIPIRKQSQLNDQTLHISRASAPSVQPAVSRENEFGYVQRHVRKTSIDERRPPKRKPDASPQVPAVSSIMIPHDPEDQGFHDYSLDQPHPPQFQQQQQSNSSQIPFNLHTFDIDNDPIINSAGPFQNQFTFSPIGSPMATNQGNNYSSMFNNAHSM…	934	100.255	7.847	48.98	-0.825	0(N)	Nucleus	2	PF08550;PF00320	Nitrogen regulatory protein areA, GATA-like domain;GATA zinc finger	IWKLYNKQKSQLPNSERMENLTWRMMSM;CTNCFTQTTPLWRRNPEGHPLCNACGLFLKLHGV	122;698	149;731	3.2e-09;7.3e-13	1	CTNCFTQTTPLWRRNPEGHPLCNAC	Type IVa
15	EnsemblFungi	Ascomycota	Dothideomycetes	Botryosphaeriales	Diplodia corticola str. CBS 112549	Dcor7	OJD38008	MNGYYPMDQSGPGDNMMGVMTQDGMGSDMVGGQSLDDIVNQNSKTMRRQSVPMHYNSGQPSGLEGDMRRVSMMEFSGATPGQLDQYQFDPATAAPNMDSMVGDAFARRDHGYQRRRPSSGDISMDTRLHGSQSGYGNIVQPGSYASPLVPTTGLDMGMNSPYVSSGLSMSMNMTDPSLGMMGAGDGTPINMFSQAQFASPMMGSPIGQDFGDSMQPMPDPGGNGEPGDMDLNVTSENHTPSLRRNSQDNSATPSAHSSRPPNGNMPQPQSVPAPSPGPNVSTPYGHERQQPMAQSGGSVGRPLPWSTPAGGFPSTMANRPHIQTQFHNAYSSSGFDMLGVLMRVATRPKPEINIGSVDLSCAFVVCDADKDDNPIVYCSENFERLTGYTRHMILGRNCR…	1035	112.528	7.008	59.83	-0.633	0(N)	Nucleus	3	PF13426;PF08447;PF00320	PAS domain;PAS fold;GATA zinc finger	AFVVCDADKDDNPIVYCSENFERLTGYTRHMILGRNCRFLQSPDGQVEAGARRKYVDDDSVLYLKNMINTRREAQISLINYRRGGQPFMNLLTMIPITWDDSGDVKFFVGFQVDL;LYLSPSAARVLEYEASELVGTALSSVCHPSDIVPVTRELKDTSSGSTVNVVFRIRRKHNGYMWFEGHGSLHTEQGK;CANCHTRVTPEWRRGPSGNRDLCNSCGLRWAKQN	362;568;913	476;643;946	6.7e-15;1.2e-06;1.7e-10	1	CANCHTRVTPEWRRGPSGNRDLCNSC	Type IVb
16	EnsemblFungi	Ascomycota	Dothideomycetes	Botryosphaeriales	Diplodia corticola str. CBS 112549	Dcor8	OJD40406	MSGPSAQLHPRSDLPGAAADALPEQRHPDSVLRHASQEELELAQNLRALSNAQDQHQPHPARETPPEPHHVAPEREQRGSPEPSGKGPEVSEHHSLEDIQHFAANANATANAQPQQARPLSPSPGAATPRPSAANAPMNGQTCRYASPGFVGARSTSNQCSNCGTTRTPLWRRSPTGEPICNACGLYLKARNQSRPSNLKRNLAQAPTMSVQPGQRTPEPHDRSQSPSGCQASSRPPYVTAEQASGTCPGGGRCNGTGGQQGCNGCPAYNNRVSKTARYALAHVNSPSSSQQTSAGEGPAADAPQPGQQQHLATPAGANVVPACANCRTTVTPLWRRDEAGHTICNACGLYYKLHGVHRPVQMKKQEIKRRKRVVPAVPAEPASHLFAQHPPAHYQQHG…	613	65.4032	8.609	49.98	-0.92	0(N)	Cytoplasm|Nucleus	2	PF00320;PF00320	GATA zinc finger;GATA zinc finger	CSNCGTTRTPLWRRSPTGEPICNACGLYLKARN;CANCRTTVTPLWRRDEAGHTICNACGLYYKLHGV	160;324	192;357	8.8e-11;4.4e-12	2	CSNCGTTRTPLWRRSPTGEPICNAC;CANCRTTVTPLWRRDEAGHTICNAC	Type IVa;Type IVa
17	EnsemblFungi	Ascomycota	Dothideomycetes	Botryosphaeriales	Diplodia seriata	Dser1	KKY14011	MPPSPLASHPASLRDLHLVLTRATTVMRASPSVLQLTGHPLQSFLGVALHGLVHDDDAAVFLAELEQATHSAAYVFRFFARLRTAHPSPAYAAFDFHGHFQRAVPIAFFVCVARPAFLSSSMHMDTLLDLKTTELRLLREIADLRAERDNESPVCPPSDPVRFLVTSPSLQSSEGGCTTTVCGDLGIPYKLKPFERTKPGPERPGHLICTWCATTEAPEWRRGPGGPKTLCNACGLKYSKSCRKSASSSRSIVPSRERRKRTDGRMNTVYSPPTSSKSPSVD	282	30.865	9.244	73.72	-0.265	0(N)	Nucleus	1	PF00320	GATA zinc finger	CTWCATTEAPEWRRGPGGPKTLCNACGLKYSK	209	240	9.2e-08	1	CTWCATTEAPEWRRGPGGPKTLCNAC	Type IVb
18	EnsemblFungi	Ascomycota	Dothideomycetes	Botryosphaeriales	Diplodia seriata	Dser2	KKY14058	MTYATSAPATSGGQNPPICQNCTTSTTPLWRRDEVGSVLCNACGLFLKLHGRPRPISLKTDVIKSRNRVKTSGQGPKKKQQHDNGLDQVRAAAGTPPVDALSNHRRAQKVSSGASERSTSPLSRTGTPSLGHHHPSNIAPQHMFDGVTLNGHEFHSPSLPSFMPHRQPSPSASSVNGSHLEPPMSYDGLATTNTALKTRVSELEVINDLFRGRVTELEQSEQRARQDEAHVRDHDKRLQQDLEDSHAREAELKRRVDELEAELAEYRGEGPRQKRMRLSDIVDESAASTPLSTPSQSN	298	32.6909	8.696	62.55	-0.88	0(N)	Nucleus	2	PF00320;PF25026	GATA zinc finger;Asd-4-like domain	CQNCTTSTTPLWRRDEVGSVLCNACGLFLKLHGR;SYDGLATTNTALKTRVSELEVINDLFRGRVTELEQSEQRARQDEAHVRDHDKRLQQDLEDSHAREAELKRRVDELEAEL	19;185	52;263	9.5e-12;2.6e-28	1	CQNCTTSTTPLWRRDEVGSVLCNAC	Type IVa
19	EnsemblFungi	Ascomycota	Dothideomycetes	Botryosphaeriales	Diplodia seriata	Dser3	KKY17608	MPDQSHAPPIATVRDLHCVLARGTTVLHASPGILRLTGHELHSFVGLPLCHLVHPDDCPIFLNELDHAALSPGRVFRFYSRIRTAFQSPAYAAFELQGHFHQLHPPVAALGRFVLVARPAFLSSSMQIDRFLELKIEEISLQRHLDGLRQAEDDDDEDTDLAVVAPSSSVVPDAQPLALLSGFAASAQNAMMGPSATNTTPRNHARPHALVDGDVGIPYTLRSPDSAARKAANEKRNSQKSPVGHVCTWCGTTEAPEWRRGPSGAKTLCNACGCMFPDLFFSCMLIFKSIVCATMRACSFCYWVSFCALKPLNSKVQVKKCFLPV	325	35.5115	7.589	83.51	-0.008	0(N)	Cytoplasm|Nucleus	1	PF00320	GATA zinc finger	CTWCGTTEAPEWRRGPSGAKTLCNACGCM	247	275	3e-07	1	CTWCGTTEAPEWRRGPSGAKTLCNAC	Type IVb
20	EnsemblFungi	Ascomycota	Dothideomycetes	Botryosphaeriales	Diplodia seriata	Dser4	KKY22422	MDPRYSSLPYPDPGRPIADAVAAASITEASASASGRHGGASTARRTKPAATWAHISAAVLESLRDLHYVLSLSGNIQHVSPNSPALLRYGPEELVGTVLVDHVHEDDAPVYRDELREASSTGRPFRFYCRIRSRVNIVGAGANADTALFPSEFAERDPTSPPSFSVFEVTGRFHEGDPPGPIPVGIGVTATPPNDDGLFVLMARPYPLAQGTKLDSFLSLKIENERLNAQLAALKAEQQENESDADSEEYDGYHQTRQYSMAAPTSAFTTTTMRRPSDGFPWFDIPPSNVTLTTGSASSAQESVFSGSGSSMFGPASSSSTNTSASIIGPSLSSPSPRSVGHKPPPTLLSRTFSTTAVPGTIAATTNRGGRNNTNNNYDNRSPPTNTPTIMEGDVGIPF…	504	52.5724	7.121	59.7	-0.462	0(N)	Nucleus	1	PF00320	GATA zinc finger	CSWCGTTTSPEWRKGPSGPKSLCNACGLRYAKFRR	423	457	8.3e-12	1	CSWCGTTTSPEWRKGPSGPKSLCNAC	Type IVb
21	EnsemblFungi	Ascomycota	Dothideomycetes	Botryosphaeriales	Diplodia seriata	Dser5	KKY24683	MYQNGGVTGDMAGGPPGMVQMPPFVDQNGLLDGMDVNMLSMDLDLGPDRDAPTQSYNTPIAAQPPHSQSTPADSHDAFAVQPTVSTSYSMSGIGAGPLPTGFGMPSQNPSGSTLTEFTKRRNWSQRVIEELRDLLHILTPDGRIVYVSPSCKTLTGWEPQQLVGRVVTDFIHTDDSGIFIREFNESIASQNALRFFYRFRKADGSFAIFESHGHGHFDQQAPGFAGSSSFAFCRGFFMMARPYPIKNTSLLDSFLEHKIENERLTKRVAELKREEQEEQEAQDRHWMKKQEAHGSVTPSVTDAAKTGNETPLSNNGGMPPPPRPGVSNAALTRQNLDEVLAASKPDSINDKMARYEGATHIDTIEMLTGLRYRDGERSQGISTGDTSPALIRGDAGIAI…	463	50.635	5.724	62.61	-0.601	0(N)	Nucleus	2	PF08447;PF00320	PAS fold;GATA zinc finger	IVYVSPSCKTLTGWEPQQLVGRVVTDFIHTDDSGIFIREFNESIASQNALRFFYRFRKADGSFAIFESHGHGHFDQ;CTDCGTLDSPEWRKGPNGPKTLCNACGLA	144;423	219;451	6e-08;4.9e-09	1	CTDCGTLDSPEWRKGPNGPKTLCNAC	Type IVb
22	EnsemblFungi	Ascomycota	Dothideomycetes	Botryosphaeriales	Lasiodiplodia theobromae str. LA-SOL3	Lthe1	KAB2572487	MLDGQIILAVNTTAQIHQSLCDTALNSMPDARAKRVFPSTATTASTLAISLLNRPVAIENLHYHNRPPSPRDLAPFNTASALDERPSLPSIGLTISRPSSATSQSGAHLPPPQPLHRGTSPGIQLPGVSSLASLAGSATSSPSISSRPPNAVSHSMTYATSAPATSGGQNPPICQNCTTSTTPLWRRDEVGSVLCNACGLFLKLHGRPRPISLKTDVIKSRNRVKTSGQGPKKKQQQHDNGLDQARAAAGTPPVDQLANHHRRAQKVSSGASERSTSPLSRTGTPNLGQHHPSNIAPQHMFDGVTLNGHEFHSPSLPSFMPHRQPSPSASSVNGSSHLEPPMSYDGLATTNTALKTRVSELEVINDLFRGRVTELEQSEQRARQDEAHARDHEKRLQQD…	456	49.1582	9.274	69.19	-0.682	0(N)	Cytoplasm|Nucleus	2	PF00320;PF25026	GATA zinc finger;Asd-4-like domain	CQNCTTSTTPLWRRDEVGSVLCNACGLFLKLHGR;SYDGLATTNTALKTRVSELEVINDLFRGRVTELEQSEQRARQDEAHARDHEKRLQQDLDESHAREAELKRRVEELEAEL	174;343	207;421	1.7e-11;3e-28	1	CQNCTTSTTPLWRRDEVGSVLCNAC	Type IVa
23	EnsemblFungi	Ascomycota	Dothideomycetes	Botryosphaeriales	Lasiodiplodia theobromae str. LA-SOL3	Lthe2	KAB2573407	MQDTSAALLTGVRDLLLHLDPTTTAILRASPSSTALIGTAPADLRGQPLAALIHPDDFPVFISEMHDAAAAAGRSSSIAFRFHVRISSASSTGYAAFELHGSLQRAGGYLVLTARPLFLLKHTAAFDSFLDLKTEQLMLLRQIRELRDEALAEAAAAAAIPPSPATTTTTGMSPYPAAVGAAVAREVKGDLGIFFVPKEHADAPVKRRGKRKVAADDELPIGERCCQWCGATSAPEWRRGPGGPKTLCNACGRKSSPPLLLPLSF	265	28.0199	8.643	88.98	0.024	0(N)	Nucleus	1	PF00320	GATA zinc finger	CQWCGATSAPEWRRGPGGPKTLCNACG	226	252	5e-06	1	CQWCGATSAPEWRRGPGGPKTLCNAC	Type IVb
24	EnsemblFungi	Ascomycota	Dothideomycetes	Botryosphaeriales	Lasiodiplodia theobromae str. LA-SOL3	Lthe3	KAB2574007	MVVVPASTTTTLRRRRSFDTVLPTALDDIVLSSLHDLFFILSPSTTIIRVSTNCLSILGCEPDLLLGQRLAALIHGDDVHVFASELDNAMRLNAAVPFRFYCRIRSAARAERDYSAFELVGRYQTKLADSLSPLHLMTPPPGIFSITARPAFTTRGAMLDEMLDLKTEEIRLLSRIAELRQEGDKMSTSNTLNLRNTFPAGKSAQTSGLSTNPAPGQVLMGDAGIPYLTKLEGSFLGKTPTATRLTKRKVVARETGCDECGTFNTPEWRLGPNGPKTLCNACGLRYSKAKRKAKAFVKEEPKLKEEDVNIKQEE	314	34.5915	9.057	87.04	-0.227	0(N)	Nucleus	1	PF00320	GATA zinc finger	CDECGTFNTPEWRLGPNGPKTLCNACGLRYSKAKR	257	291	1.2e-10	1	CDECGTFNTPEWRLGPNGPKTLCNAC	Type IVb
25	EnsemblFungi	Ascomycota	Dothideomycetes	Botryosphaeriales	Lasiodiplodia theobromae str. LA-SOL3	Lthe4	KAB2576131	MNGYYPLDQSGSGDNMMGVMNQDDMNPNMVGGQSLDDIVNQNSKAMRRQSVPMHYSSGRPADLEGDMRRVSMMEFSGATPGQLDQFQFDPATAAPNMDSMVGDAFARRNHPYQRRRPSSGDIGIDTRLHNSQSYGNMVPPGSYASPLAATSGLDMGMNSPYVSSGLPMSMDMTDPSLGMMNPGDTTPLNMFSQAQFASPMMGSPIGQDFTDSMQSMPDPGGSAPPGSMEINVGSETPGMTPDIRRRNSQDQSTTPSANSSRPPNGNMPQTQSVGGQSSGTNVSTPYGGPERSQPLAHSGGTMGRPLPWTTPPGGFPSTMANRPHIDTQFKNAYSSSGFDMLGVLMRVATRPKPEINIGSVDLSCAFVVCDAEKDDNPIVYCSENFERLTGYTRHMILGR…	1044	113.625	6.937	61.01	-0.615	0(N)	Nucleus	3	PF13426;PF08447;PF00320	PAS domain;PAS fold;GATA zinc finger	FVVCDAEKDDNPIVYCSENFERLTGYTRHMILGRNCRFLQSPDGQVEAGCKRKYVDDDSVLYLKNMINTRREAQISLINYRRGGQPFMNLLTMIPITWDDSEIIKFFVGFQVDL;LYLSPSAARVLEYEASELVGTALSSVCHPSDIVPVTRELKDTSSGSSVNVVFRIRRKHSGYMWFEGHGSLHTEQGK;CANCHTRVTPEWRRGPSGNRDLCNSCGLRWAKQN	366;571;920	479;646;953	1.1e-13;8.8e-07;1.7e-10	1	CANCHTRVTPEWRRGPSGNRDLCNSC	Type IVb
26	EnsemblFungi	Ascomycota	Dothideomycetes	Botryosphaeriales	Lasiodiplodia theobromae str. LA-SOL3	Lthe5	KAB2577306	MEAGSRQSAILPSISSIDAEKSRRDDTDFQRKHSAAAMVSPSFPYSNPPPPYASHHAPAASAPPASLAGLISPPESRRTSGDEKEQKPPARQSLPSIHEALASEQPMPYPPHPTSTAPPPASQYFQPPPSSATSHPDSARRHFSQDFSSQQTDRSPYMKPPPQPPYSQAPQDPPRPTLPTTHNPKLPTLHPLRTEPSPVNNSRPSSFSAGYPYSQQQSPAYEQTPQQAAPVQPQQQPFGYNHPYPPAAYPYSAPPPPPPPSQVNPPYPPSAPAAYSASGGYPPTWRSDGAEVRRAEESKRAGRNAGPALYGESVKRHLDNFDFEASLNEIAEGSGRLNEFLRIYGQRAHHAQRAGPLPGSTPAIHEVDELMKQSQRIVESLARIREVVLTTQQAHLAEQ…	508	54.898	9.224	44.39	-1	0(N)	Nucleus	1	PF00320	GATA zinc finger	CHSCNRAETPEWRRGPDGARTLCNACGLHYAKL	448	480	1.9e-10	1	CHSCNRAETPEWRRGPDGARTLCNAC	Type IVb
27	EnsemblFungi	Ascomycota	Dothideomycetes	Botryosphaeriales	Lasiodiplodia theobromae str. LA-SOL3	Lthe6	KAB2579135	MDPRYPIIPYLEYGMSIEDAGTAIAPATITEPSASARSRHGGAATAQRTRPAATWARISAAVLDSLRDLHYVLSLGGTVQHVSPNSAALLGYGPEELLGTVLADHVHEDDAPVYRDELREASSTGRPFRFYCRIRSRVNVVGAGTNADAALFHSGFPERDLTSSPTFSVFEITGRFHEVVTPGPIAVGIGVAVTPPGDDGLFVLMARPYPLAQGTKLDSFLSLKIENERLTAQLAALRAEQEEKDTDVYADGHDGYYQTRQYSMEASFPAAAYTTAAAMRRPSDGFPWFDATPASMTLTTGSASSSAQESVFSGSASSMFGPASSSSTNTSASIIAGPSPSFPSSSSRSGGAAVAGRKPPPPLLSRTFSTTAVPGTIAATTSRSVNNAIAIDNRSPPTN…	516	53.3276	6.722	65.17	-0.266	0(N)	Nucleus	1	PF00320	GATA zinc finger	CSWCSTTSSPEWRKGPSGPKSLCNACGLRYAKSRRK	435	470	3.1e-11	1	CSWCSTTSSPEWRKGPSGPKSLCNAC	Type IVb
28	EnsemblFungi	Ascomycota	Dothideomycetes	Botryosphaeriales	Lasiodiplodia theobromae str. LA-SOL3	Lthe7	KAB2579244	MSDAQHGERGGGMHASPLSADFDNDAIGAMADLHSFHTSSSPRHVRFPQGHRDDVSGTSSAVQSLTSASTLDSSKLDLSPSDSAAREGVLRDTFFPRLKNDAVPNLDDPEEMQKKDPIGTQIWKLYNKQKSQLPNSERMENLTWRMMSMNLRKMRRQSAQLSHKPTNDDKRAGSRPTTAPSGIAQLRSLSRDKQAQLDLEASKPEPMNLDDFIVPSSVASPAGVPHSPSASDDQPSSTNATAPAIPIRKQSQLNDQTLHISRASAPSVQPVVSRENEFGYVQRHVRKTSIDERRPPKRKPDASPQVPAVSSIMIPHDPEDQGFHDYSLDQPHPPQFQQHSNSNQIPFNLHTFDIDNDPIINSAGPFQNQFTFSPIGSPMATNQGNNYSNMFNNAHSMAS…	929	99.6445	8.463	48.92	-0.815	0(N)	Nucleus	2	PF08550;PF00320	Nitrogen regulatory protein areA, GATA-like domain;GATA zinc finger	IWKLYNKQKSQLPNSERMENLTWRMMSM;CTNCFTQTTPLWRRNPEGHPLCNACGLFLKLHGV	122;696	149;729	3.2e-09;7.2e-13	1	CTNCFTQTTPLWRRNPEGHPLCNAC	Type IVa
29	EnsemblFungi	Ascomycota	Dothideomycetes	Botryosphaeriales	Lasiodiplodia theobromae str. LA-SOL3	Lthe8	KAB2579546	MSGPSAQLHPRSDLPAAADDSLHSNAVLRHASQEELELAQNLRALSNAQDQHQQPPARENNPQPHDMPPEREQRPLPDASGKAPEVSEHHSLEDIQHFSANPQPHQPRTHSPSPGASTPRPPAANAPMNGQTCSNCGTTRTPLWRRSPTGEPICNACGLYLKARNQSRPSNLKRNLAQAPTMSVQPGQRTPEPHDRSQSPSGCQASSRPPYVAAEQASGTCPGGGRCNGTGGQQGCNGCPAYNNRVSKTARYALAHVNSSTSNPQTSVSEGSAPESAQTAQQQHLATPAGANVVPACANCRTTVTPLWRRDEAGHTICNACGLYYKLHGVHRPVQMKKQEIKRRKRVVPAVPAEPANHLFAQHPPAHYQQHGQPTQQPQRSPSQAAVSPAPTQESFPES…	587	63.239	8.747	49.83	-0.964	0(N)	Nucleus	2	PF00320;PF00320	GATA zinc finger;GATA zinc finger	CSNCGTTRTPLWRRSPTGEPICNACGLYLKARN;CANCRTTVTPLWRRDEAGHTICNACGLYYKLHGV	133;297	165;330	8.4e-11;4.2e-12	2	CSNCGTTRTPLWRRSPTGEPICNAC;CANCRTTVTPLWRRDEAGHTICNAC	Type IVa;Type IVa
30	EnsemblFungi	Ascomycota	Dothideomycetes	Botryosphaeriales	Lasiodiplodia theobromae str. LA-SOL3	Lthe9	KAB2580498	MTTPDRSLLDDAVVDPSTPTAIADSQLAPQSHVDALDDILLSSLHDLHFILSPSTTILRVSANCLNLLGCEPNLLLGQRLAALVHKDDAHVFSSEIDDALLRPSNSVLIDSGAFDASLSTVAPRRPPFRFYCRIRSVVHLGSDYSAFELVGHYQVKMPASLSPLQLMMPPPGIISITARPAFSRKGRLMDGMLELKMEQIRLVRLIRKMRREAEEGHYEGDDEEEEAVLTIAATPAPMHHHHSFQQVEERVLLKSTRRPSTPGGASKRSRSSPPRLTWMASTAEQQQQQPEQQTEPEPISSPWNTQSNGDASPGDASPKVKLGDAGIPFFIRPEGYERKTSDVPRQPKRKFVAKDYCCSRCGTVESPEWRAGPDGPKTLCNACGLKYAKEQKRAEKLKQ…	403	44.5692	6.646	78.21	-0.481	0(N)	Nucleus	1	PF00320	GATA zinc finger	CSRCGTVESPEWRAGPDGPKTLCNACGLKYAKEQ	358	391	1e-10	1	CSRCGTVESPEWRAGPDGPKTLCNAC	Type IVb
31	EnsemblFungi	Ascomycota	Dothideomycetes	Botryosphaeriales	Lasiodiplodia theobromae str. LA-SOL3	Lthe10	KAB2580727	MYQNGGVTGDMAAGPPGMVQMSPFVDQNGLLDGMDVNMLSMDLDLGAMGPDHDAPTQSYNTPIAAQPPHSQSTPADSNDAFAVQPTVSNSYSMSGIGAGPLPTGFGMPSQNPSGSTLTEFTKRRNWSQRVIEELRDLLHILTPDGRIVYVSPSCKTLTGWEPQQLVGRVVTDFIHSDDSGIFIREFNESIASQNALRFFYRFRKADGAYVIFESHGHGHFDQPAPGFAGSSAFAYCRGFFMMARPYPIKNTSLLDSFLEHKIENERLTKRVAELKREEQEEQEAQERHWMKKQEGHSSVTPSVTDAAKTGNETPMSNNGMPPPPRPGVSNAALTRQNLDEVLAASKPDSINDKMARYEGATHIDTIEMLTGLRYRDGERSQGISTGDTSPALIRGDAGI…	484	52.7685	5.93	60.31	-0.626	0(N)	Nucleus	2	PF08447;PF00320	PAS fold;GATA zinc finger	IVYVSPSCKTLTGWEPQQLVGRVVTDFIHSDDSGIFIREFNESIASQNALRFFYRFRKADGAYVIFESHGHGHFD;CTDCGTLDSPEWRKGPNGPKTLCNACGLRWAKKEKK	147;425	221;460	1.3e-08;1.5e-11	1	CTDCGTLDSPEWRKGPNGPKTLCNAC	Type IVb
32	EnsemblFungi	Ascomycota	Dothideomycetes	Botryosphaeriales	Macrophomina phaseolina MS6	Mpha1	EKG10461	MNGYYPMDQPGSGENMMGVMNQDEMSPSMMGGQSLDDIVNQNSKAMRRQSVPVHYASGRQPDLEGDMRRVSMLEFSGAAPGQLDQFQFDPATAAPNIDGMMSVGDAYTRRNSSYQRRRPSAGDLSLDTRLHNSQASFTNIPSHGSYASPLAPTTGMDMGITSPYHSSGLPINIDLTDPSLSMMNTGDGTPMNMYSQPQFASPLIGSPITQDFADSMQAMPDPGGSGGPGSMDLNVGSETQSMTPDIRRRDSREHSAPQSAHSNHPQDGNNTMPQAPDPHSARNGTYGPERTIPQSVTHMGPQFPWATPPGGFPSTMQNRPHMETQFKNVYSSTGFDMLGVLMRVATRPKPEINIGSVDLSCAFVVCDAEKDDFPIVYCSENFERLTGYTRHMILGRNCR…	1040	113.781	6.997	62.12	-0.623	0(N)	Nucleus	3	PF13426;PF08447;PF00320	PAS domain;PAS fold;GATA zinc finger	FVVCDAEKDDFPIVYCSENFERLTGYTRHMILGRNCRFLQSPDGKVEAGTKRKYVDDDSVLYLKNMITARKEAQISLINYRRGGQPFMNLLTMIPITWDDSEQTKFFVGFQVDL;LYLSPSAARVLEYEASELVGTALSSVCHPSDIVPVTRELKDTSAGSAVNVVFRIRRKHSGYMWFEGHGSLHTEQGK;CANCHTRVTPEWRRGPSGNRDLCNSCGLRWAKQN	363;568;917	476;643;950	6.2e-13;1e-06;1.7e-10	1	CANCHTRVTPEWRRGPSGNRDLCNSC	Type IVb
33	EnsemblFungi	Ascomycota	Dothideomycetes	Botryosphaeriales	Macrophomina phaseolina MS6	Mpha2	EKG13498	MSGPSAQLQSPGDHPGDSSLHPKPHTDSVLRNASQEELELAQNLRALSNAQDQPQQHPVRESKPQPHGVQPECEQRTSPERSGKPSEVSEHHSLEDIQHFAASQQPQQPRPLSPSPGTAAPRPNPANAPMNGQTCSNCGTTRTPLWRRSPTGEPICNACGLYLKARNQSRPSNLKRNLAQAPTMSVQQNQRTPEPHDRSQSPSGYPPTSRPSYVAAEQASGTCPGGGRCNGTGGQQGCNGCPAYNNRVSKTARYALAHVNAPNGNQPSNLGDGSAADGAQAGQQQPLATPAGANVVPACANCRTTVTPLWRRDEAGHTICNACGLYYKLHGVHRPVQMKKQEIKRRKRVVPAAPAESASHLFAQHPPAHYQQGQPSPQPQRSPSQSAPSPAPTQESFAE…	588	62.8996	8.819	46.9	-0.998	0(N)	Nucleus	2	PF00320;PF00320	GATA zinc finger;GATA zinc finger	CSNCGTTRTPLWRRSPTGEPICNACGLYLKARN;CANCRTTVTPLWRRDEAGHTICNACGLYYKLHGV	135;299	167;332	8.4e-11;4.2e-12	2	CSNCGTTRTPLWRRSPTGEPICNAC;CANCRTTVTPLWRRDEAGHTICNAC	Type IVa;Type IVa
34	EnsemblFungi	Ascomycota	Dothideomycetes	Botryosphaeriales	Macrophomina phaseolina MS6	Mpha3	EKG13926	MYQNGGVTGDMAGGPPSMPLMMDHHGLLDGVDVNMLSMDLDMSALGHEHEVQSQSYNNTPIAAQPPRTQPTPADSHDAFAVQPTANHSYSMSGIGAGPLPTGFGMQSQNPSGSTLTEFTKRRNWSQRVIEELRDLLHILTPDGRIVYVSPSCKTLTGWDSQQLIGRLVTEFIHPDDSGIFIREFNESIASQNPLRFFYRFRKADASYVIFESHGHGHFDQPAPGFAGANSFAFCRGFFMMARPYPIKNTSLLDSFLEHKIENERLTKRIAELKREEQEEQEAQERHWMKKQDGHSSVTPSVSVTEATKTNTGNDTPQSYNGMPPPARPGISNVALTRQNLDEVLAASKPDSINDKMARYEGATHIDTIEMLTGLRYRDGERSQGISTGDTSPALIRGDA…	486	53.5423	6.255	61.46	-0.675	0(N)	Nucleus	2	PF08447;PF00320	PAS fold;GATA zinc finger	IVYVSPSCKTLTGWDSQQLIGRLVTEFIHPDDSGIFIREFNESIASQNPLRFFYRFRKADASYVIFESHGHGHFD;CTDCGTLDSPEWRKGPNGPKTLCNACGLRWAKKEKK	145;427	219;462	1.3e-08;1.5e-11	1	CTDCGTLDSPEWRKGPNGPKTLCNAC	Type IVb
35	EnsemblFungi	Ascomycota	Dothideomycetes	Botryosphaeriales	Macrophomina phaseolina MS6	Mpha4	EKG16558	MTSAYDRSPDDGHGDVDFSLETSTITQRRPDPSAALDDIVLSSLHSLHFILSPSTTILRVSTNCLSLLGCEPNLLLGQRLAALIHRDDARVFNSELHDALRSPSSASFRFHCRIRSVVAADFSHSAFELLGNYQVTPPATLSPLQLMMPPPGIFSIMARPAVTKRGRELDGMLELKVEQIRLMRRIEDLQRQVAAADTDDDESPVEGESSSADPTRSSRSRVSSSSASIHKPSRSRSSPPRMGDESPATKAELLGAPSKAEIGDIGIPFLLRSRDSYASERSTDTERLTKRKFLGRQYRCSRCGRTDSPEWRRGPDGPKTLCNACGLMYSKAKRRTEKQLEQSQTGREEDGDADTQMADHPPVRQGARP	369	40.7022	7.662	70.92	-0.63	0(N)	Nucleus	1	PF00320	GATA zinc finger	CSRCGRTDSPEWRRGPDGPKTLCNACGLMYSKA	300	332	1.7e-10	1	CSRCGRTDSPEWRRGPDGPKTLCNAC	Type IVb
36	EnsemblFungi	Ascomycota	Dothideomycetes	Botryosphaeriales	Macrophomina phaseolina MS6	Mpha5	EKG17886	MSGAQHGERGGGMHASPLSADFDNDAIGAMADLHSYHTSSSPRHVRFPQSHRDDDLSGSSSAVQSLTSASTLDSSKLDLSPSDTAAREGVLRDSFFPRLKNDAPADFDDPEEMQKKDPIGTQIWKLYNKQKSQLPNSERMENLTWRMMSMNLRKMRRQSAQLSHKPTNDDKRTSSRPTTAPSGIAQLRSLSQDKQDLEASKAEPMNLDDFIVPSSVASPAGMPHSPSADDQPSSTNATAPAIPIRKQSQLNDQTLHISRASAPSVPPAVIRDNEFGYVQRHVRKTSIDERRPPKRKPDASPQVPAVNSIMIPHDPEDQSFHNYSLDQPQPQPFHQQPNSGQIHFNLNTFDIDNDPIISSAGPFQNQFTFSPIGSPMATQNNYSNMFTNANSMASSLNST…	923	99.0898	8.188	48.4	-0.839	0(N)	Nucleus	2	PF08550;PF00320	Nitrogen regulatory protein areA, GATA-like domain;GATA zinc finger	IWKLYNKQKSQLPNSERMENLTWRMMSM;CTNCFTQTTPLWRRNPEGHPLCNACGLFLKLHGV	123;690	150;723	3.2e-09;7.2e-13	1	CTNCFTQTTPLWRRNPEGHPLCNAC	Type IVa
37	EnsemblFungi	Ascomycota	Dothideomycetes	Botryosphaeriales	Macrophomina phaseolina MS6	Mpha6	EKG20543	MVSPSFPYSNPPPPYSSHHAPAASAPPASLAGLISPPESRRTSGDEKEQKPPARQSLPSIHEALASDQPMSYPPHPPSTAPPPASHYYQPPLSSATSHPDASRRHYSQDFANKEPPTSYPQQTERSPYMKPPPQIPPYSQSQQDPPRPTLPATHNPKLPTLHPLRTEQSPVNNARPSSFSAGYPYSQQQSPAYEQNAQSAGPVQPQQPPFGYNPYPPGAYPYGAPPPPPPPTQGNPPYPPQSAPAYSAPAGYPPTWRSDGAEVRRAEENKRAGRHAGPALYGESVKRHLDNFDFEASLNEIAEGSGRLNDFLRVYGQRAHQAQRSGPVPGSTPTIGEVDDLMKQGQRIVDSLARIREVVLTTQQAHMAEQAQDPRYKATNGYEPEESHNPYGEDPKGGG…	479	51.7575	9.193	41.52	-1.069	0(N)	Nucleus	1	PF00320	GATA zinc finger	CHSCNRAETPEWRRGPDGARTLCNACGLHYAKL	419	451	1.8e-10	1	CHSCNRAETPEWRRGPDGARTLCNAC	Type IVb
38	EnsemblFungi	Ascomycota	Dothideomycetes	Botryosphaeriales	Neofusicoccum parvum UCRNP2	Nparv1	EOD44190	MTYATSAPATSGGPNPPICQNCTTSTTPLWRRDEVGSVLCNACGLFLKLHGRPRPISLKTDVIKSRNRVKTSGQGPKKKQQQHDNGLDQARAAAGTPPVDALANHRRSQKVSSGASERSTSPLSRTGTPSLHHPSNIAPQHMFDGVTLNGHEFHSPSLPSFMHRQPSPSASSVNGSHLEPPMSYDGLATTNTALKTRVSELEVINDLFRGRVTELEQSEQRARQDEAHARDHEKRLQQELEESHSREAELKRRVDELEAELAEYRGEGPRQKKMRLSDIVDESAASTPMSTPSQSN	296	32.4887	8.683	60.03	-0.903	0(N)	Nucleus	2	PF00320;PF25026	GATA zinc finger;Asd-4-like domain	CQNCTTSTTPLWRRDEVGSVLCNACGLFLKLHGR;SYDGLATTNTALKTRVSELEVINDLFRGRVTELEQSEQRARQDEAHARDHEKRLQQELEESHSREAELKRRVDELEAEL	19;183	52;261	9.4e-12;1.1e-28	1	CQNCTTSTTPLWRRDEVGSVLCNAC	Type IVa
39	EnsemblFungi	Ascomycota	Dothideomycetes	Botryosphaeriales	Neofusicoccum parvum UCRNP2	Nparv2	EOD44809	MDPEYPFFPYQDPGITNSAAPGAATTSSSASTSRSYRHGATTTKRTKPPTINWARISAAVLESLRDLHYVLSLAGSIEHVSPNSAALLGYAPEQLIGTVMADHVHEDDAPLYRDELREASSTGRPFRFYCRIRSCRRGSSNGLFTAADVADNTISRQEDAAAYHVSASDQGTSTMPSHSVFEVSGRFHEANSPRPVPVGIGLVATPPSDEGMFVLMARPYPLAQSRRLDSFLSLKMENERLTQQLAALKAEKKRGSDNEHDQPDTEQHDTDYPHRYAMAAPSSSLTFMTSTTSSFNRRQSEGFPWFDATPSTITRTSGSASSSAHESVFSSVSTPFGPASSSSTSTNVSTKPGTPVTSAPSTTKATTQPPTIIPSASKSPTNTPTVMEGDVGIPFIVKA…	469	50.2535	8.12	61.88	-0.433	0(N)	Nucleus	1	PF00320	GATA zinc finger	CAWCSTTASPEWRKGPSGPKSLCNACGC	418	445	1.2e-06	1	CAWCSTTASPEWRKGPSGPKSLCNAC	Type IVb
40	EnsemblFungi	Ascomycota	Dothideomycetes	Dothideales	Aureobasidium melanogenum CBS 110374	Amel1	KEQ59671	MADMTAHSSSTTSSAVQSLTSASTLDSPTESSARRALRDSVFESATWREPDGETPEELQRKDPLGTQIWKLYSKTKNTLPNSERMENLTWRMMSMNLRRAQQQSRLAHAYQQRANAPSGIAQLRQSAEAQSQTQSQTQGQSQSQPHFAIPASDHMNLDDFIVPSSIASPISQPSPSASFDPSTTADSKATPTGIPIRRHQQLQEEAQDDFVARASAPSVAPTAVNKTTDEFGYIQRHVRKTSIDERRPPKRRADCSPQVPPVTTGMPNDALLNNYSLDSTPYNPTGTQAQVPFGLDTFGFDAGANSTNNDPLLTSAGPFQSNFNFSPVGSPMMANGPYTNMFNQSVMANNYCSPPQSSYHSRVSTPQPIPEHEPVFFNTSSSVDLRHHAHMSSYTSQQP…	853	91.6093	7.31	48.69	-0.719	0(N)	Nucleus	2	PF08550;PF00320	Nitrogen regulatory protein areA, GATA-like domain;GATA zinc finger	IWKLYSKTKNTLPNSERMENLTWRMMSM;CTNCFTQTTPLWRRNPEGHPLCNACGLFLKLHGV	68;630	95;663	1.7e-09;6.6e-13	1	CTNCFTQTTPLWRRNPEGHPLCNAC	Type IVa
41	EnsemblFungi	Ascomycota	Dothideomycetes	Dothideales	Aureobasidium melanogenum CBS 110374	Amel2	KEQ59738	MLDIEKIKREEAEYQARGTNMSMAPSATNSPTIAYPSGPPPPYSRPSYPDARLPTETRRSSNEDPSNQANKQSLPSIHEALGVEQPAPYPPTSQRPYSSAPQPPYHAPVTGPSPASPLPARRSFAAMEPPPPPQPAVFTHGPRSPYVQPHQEISPRQVPEHQDRQRSVYSSQPIASHAGQSPLAHQSQYPRSYPVTASHERTASHHLSMPPVAPPPPSAPQHALPYGYAPAPAPASAPAPVPPPAPYASHYTYPSSAPHSAAPTSSVYQPSITQPAPPQNGEPGRAAFGDSVKRHLDMWDFGEALNEIAESSSYMLDFSRQCGARLHQSQRSDPAPGNLPQLQEIDHLMEKSRRQLDCYAKMREFIIAQQTAYFQQAQEQQSRAQEGIKRDSVHQNEEA…	480	52.2343	9.076	47.79	-0.929	0(N)	Nucleus	1	PF00320	GATA zinc finger	CHSCNRAETPEWRRGPDGARTLCNACGLHYAKL	422	454	1.8e-10	1	CHSCNRAETPEWRRGPDGARTLCNAC	Type IVb
42	EnsemblFungi	Ascomycota	Dothideomycetes	Dothideales	Aureobasidium melanogenum CBS 110374	Amel3	KEQ61376	MAPNFQIEIESLPVDRSAGFHQKVVDGIEDLLLVLAEDGRVVYASSKSYSHMQIKPEALFGRYISTYMNVDDIPVFLVQWKENMALGSTWRSHHRLRQGDDTYKPFESTFKPYTDKTINKGTGTRTSTKLCLMTSRPYQITSTSLMDSFLEHYTTNIRLMNQLAQLKGEAEEFQESTTSTKMVDTTVQCATFKLEATTATATATVTATVTAKTTTPLKQVSNLALPPTTLPESESGAPRKRSISESTTSTKPQIDSVVGDIGIEIATSRLQTMKETGAWTAKPRTKKRKQELCTEYLCKECGTTDSPEWRRGPLGSKTLCNACGLRWSKAQKEKEKESIAAQKTQ	345	38.4372	8.813	67.88	-0.553	0(N)	Nucleus	1	PF00320	GATA zinc finger	CKECGTTDSPEWRRGPLGSKTLCNACGLRWSK	298	329	3.2e-10	1	CKECGTTDSPEWRRGPLGSKTLCNAC	Type IVb
43	EnsemblFungi	Ascomycota	Dothideomycetes	Dothideales	Aureobasidium melanogenum CBS 110374	Amel4	KEQ63290	MNYATSAPAATAGGQQNGPPVCQNCGTSTTPLWRRDEMGSVLCNACGLFLKLHGRPRPISLKTDVIKSRNRVKTATGPKKKPSLESPGFHHDSNTPMGSYPPHRRHSDRVSSGEHQRSPSPSSRTNTPGMVSHNPNIAPQHVFDNVSLSESSFQPSGLPTFALRQPSPAPSVNGMHPEHGHQYPENNSLKTRVSELEVINDLFRGRVAELEQSEQNARAKEASARDAADQYKADLDAALVREAALKKRVELLEAEVESYKSQAAPPPKRLRLSDVVRDDSSSTDSKPAASSESTTATAAA	300	32.4006	9.029	59.27	-0.796	0(N)	Nucleus	2	PF00320;PF25026	GATA zinc finger;Asd-4-like domain	CQNCGTSTTPLWRRDEMGSVLCNACGLFLKLHGR;HQYPENNSLKTRVSELEVINDLFRGRVAELEQSEQNARAKEASARDAADQYKADLDAALVREAALKKRVELLEAE	22;181	55;255	4.3e-12;4.399999999999999e-25	1	CQNCGTSTTPLWRRDEMGSVLCNAC	Type IVa
44	EnsemblFungi	Ascomycota	Dothideomycetes	Dothideales	Aureobasidium melanogenum CBS 110374	Amel5	KEQ65560	MSNPASTLAPSPAAAPRLSNERSKEELELAERLIEHSQGIQHGPAIADRRTTPSTADGGSRTGGDVERLSDDGGSETSLSAQQQQLTPQHSNHQQQQNLQLPSIHELTWVKQRKPFNTGMGGAGQVCSNCGTTRTPLWRRSPAGDTICNACGLYLKARNQMRPVNLKRGAQASPAGQQQQQPEQQTTASGNRKSSSPTTTTKQLGGATYVTDTTSNGTCPGGGRCNGTGGHDGCNGCPAYNNRVSKTAQIALAQANDGRAQGQHGASQSPYPHTQNSPGPSQAPAANVTVACQNCGTTITPLWRRDDNGHTICNACGMFATPSYLILISSDFDL	334	35.1722	8.618	52.72	-0.788	0(N)	Cytoplasm|Nucleus	2	PF00320;PF00320	GATA zinc finger;GATA zinc finger	CSNCGTTRTPLWRRSPAGDTICNACGLYLKARNQ;CQNCGTTITPLWRRDDNGHTICNACGMF	127;292	160;319	5.3e-11;7e-08	2	CSNCGTTRTPLWRRSPAGDTICNAC;CQNCGTTITPLWRRDDNGHTICNAC	Type IVa;Type IVa
45	EnsemblFungi	Ascomycota	Dothideomycetes	Dothideales	Aureobasidium melanogenum CBS 110374	Amel6	KEQ67109	MSGYNPYASGHGHQGDGMQQMDMSANGQIMAQGAAMDAMVGQSLDDIVSQNAKLMRRQSMPQIYHPGQQQQQQPQGTQPMDTDDPRRMSMMEFTGTSPTGPLESYQFNLPNSDMVDATAYMAASQANPSNLARQTSTGGGDLAIDNSFASASSFMPMMPPTSSYQSPANLSNMDMDLNSPYINTPMHMSSIGYNSPNIDRPMAMYNHPSYHHGMMASPLNTSVPNHMYTQSPEAGGNPNPSKRPSLENSQSRSSTSQNMQNTHQQSRQPTPQRQNTNRQQPQNQRQHSGFRAQPQNPQPGSTQDVGMDRGRNSDSGHRSPDPSKYNPNNQGFNWPTPEGGWPSTMTGRPHMHSQYKNAYSSTGFDMLGVLMRVATRPNPEINIGSVDLSCAFVVCDAEK…	1063	117.655	8.905	58.44	-0.753	0(N)	Nucleus	3	PF13426;PF08447;PF00320	PAS domain;PAS fold;GATA zinc finger	FVVCDAEKDDFPIVYCSDNFERLTGYTRHMILGRNCRFLQSPDGNVEAGVRRKYVDDDSVLYLKNMINLRREAQISLINYRRGGQPFMNLLTMIPIAWDTDQVKFFVGFQVDL;VSPSATKVLEYEPGEIIGTALSSICHPSDIVPVTRDLKDTSTGASVNVVFRIRRKNSGYMWFEGHGSLHTEQGK;CANCHTRVTPEWRRGPSGQRDLCNSCGLRWAK	392;599;933	504;672;964	6.7e-14;1.2e-06;3.1e-10	1	CANCHTRVTPEWRRGPSGQRDLCNSC	Type IVb
46	EnsemblFungi	Ascomycota	Dothideomycetes	Dothideales	Aureobasidium melanogenum CBS 110374	Amel7	KEQ67245	NNLNSMSFAAQSQHHHDDGQSQSNMSGIGAGPLPTGFGMGPPSNGGNTLTEFTKRRNWSQRVIEELRDFLHILTPDGRILYVSPSAKTLTGYEPRYLVGKFIGEFVHPEDSGIFMREFNESIASGNPLRFFYRFKREDGTYIIFECDGHPHISSDQGAYGHMSGSGQGAMSASGLCRGFFMMARPYPTKNAALLDSFLEHKIENERLKKRIEELKREEVEENQVQERQWQEQSRRDPSEAGRMDGSSEHSKTPNYQGMPPPAKPPISNTALTRQNLDSALSAQQPDSIADKMSRYEGSNHLETIEMLTGLRYRDGERSHGISTGDTSPALIRGDAGIAILLDRDRDGTKEKKKKLKVAEEYVCADCGTLDSPEWRKGPKGPKTLCNACGLRWAKKEKKK…	411	45.6054	7.312	58.22	-0.832	0(N)	Nucleus	2	PF08447;PF00320	PAS fold;GATA zinc finger	ILYVSPSAKTLTGYEPRYLVGKFIGEFVHPEDSGIFMREFNESIASGNPLRFFYRFKREDGTYIIFECDGHPHISSDQGAYGHMS;CADCGTLDSPEWRKGPKGPKTLCNACGLRWAKKEKK	79;363	163;398	1.9e-11;2e-11	1	CADCGTLDSPEWRKGPKGPKTLCNAC	Type IVb
47	EnsemblFungi	Ascomycota	Dothideomycetes	Dothideales	Aureobasidium namibiae CBS 147.97	Anam1	KEQ68409	MSATPFHLDSACLPLDRLAAFERNILDGIQDLLLVLAPDGRVLHASQMCLALTSLTPEHFVGNHIATFMHYDDLPVFLEEFKASSLSGQPWRFQHRLRKADDTFAVFESAFSPFLDTSAAQTAGFHGLHKCVMTVRPYSHPSAVLLDSYLEHITTQARLIQQLEDLRSEAEILEDDDDDEDKVILNSAMDNDRALSDRAVSKLQRTSGAGDIGIQITVSRLETIRKTGSWAAKPCVAKRRKNAKPCDHICVQCGTKDSPEWRTGSRGKKTLCNACGQCVSQP	282	31.2521	5.987	83.44	-0.28	0(N)	Cytoplasm|Nucleus	1	PF00320	GATA zinc finger	CVQCGTKDSPEWRTGSRGKKTLCNACG	250	276	2.9e-06	1	CVQCGTKDSPEWRTGSRGKKTLCNAC	Type IVb
48	EnsemblFungi	Ascomycota	Dothideomycetes	Dothideales	Aureobasidium namibiae CBS 147.97	Anam2	KEQ68990	MLDFVKAKHEEADYQARGTNMSMAPSATNSPTIAYPSGPPPPYSRPSYPDARLPSEMRRTSNEDPSNQANKQSLPSIHEALGVEQPASYSSATHRPYSSAPQPAYHAPVTAPSPASPAPARRSFAAMDPPPPPQPTFFTHGPRSPHSQPHQEISPRQMPEHDRQRSVYAPQPIATHAGQSPMNHQSQHPRSYPAAASHERTASHPLSMPPVAPPPSAPQHAVPYGYAPAPVAVPAPAPYASHYAYPPPAPHSAAPTSSIYQPSITQPAPPQNSDPGRAPFGDSVKRHLDMWDFGEALNEIADSSSHMLEFSRQCGARLHQSQRSEPTPGNLPQLQEIDHLMEKSRRQLDCYAKMREFVIAQQTAYFHQAQEQQSRAQEGMKRDSVHQSEESKAGGFAGA…	471	51.2943	9.106	42.93	-0.95	0(N)	Nucleus	1	PF00320	GATA zinc finger	CHSCNRAETPEWRRGPDGARTLCNACGLHYAKL	414	446	1.7e-10	1	CHSCNRAETPEWRRGPDGARTLCNAC	Type IVb
49	EnsemblFungi	Ascomycota	Dothideomycetes	Dothideales	Aureobasidium namibiae CBS 147.97	Anam3	KEQ71512	RTSNVMHTMNYATSAPAATAGGQQNGPPVCQNCGTSTTPLWRRDEMGSVLCNACGLFLKLHGRPRPISLKTDVIKSRNRVKTATGPKKKPSLESPNFHHVSTPVGSYPPQRRHSDRMSSGEHQRSPSPSSRNNTPGMHSHNPNIAPQHVFDNVSLSESSFQPAGLPTFALRQPSPAPSVNGMHPEHGHQYPENTASLKTRVSELEVINDLFRGRVAELEQSEQDARAKESSARDVADQYKADLDSALVREAALKKRVELLEAEVESYKSQAAPAPKRLRLSDVVRDDSS	289	31.6379	9.318	61.45	-0.803	0(N)	Nucleus	2	PF00320;PF25026	GATA zinc finger;Asd-4-like domain	CQNCGTSTTPLWRRDEMGSVLCNACGLFLKLHGR;HQYPENTASLKTRVSELEVINDLFRGRVAELEQSEQDARAKESSARDVADQYKADLDSALVREAALKKRVELLEAE	30;188	63;263	4.1e-12;1.8e-23	1	CQNCGTSTTPLWRRDEMGSVLCNAC	Type IVa
50	EnsemblFungi	Ascomycota	Dothideomycetes	Dothideales	Aureobasidium namibiae CBS 147.97	Anam4	KEQ72848	MSNPASTLAPSPVAGPRLSNERSKEELELAERLIEHSQGIQHAPPIVDRRTTPSTADGGSRSGGDVERQSDDGGSETSLSAQQQQLTPQHSHHQQQQNLQLPSIHELTWVKQRKPFNTGMGGAGQVCSNCGTTRTPLWRRSPAGDTICNACGLYLKARNQMRPVNLKRGAQASPASQQQQQDQQTTASGNRKSSSPSASAKQLGGATYVTDTTSNGTCPGGGRCNGTGGHDGCNGCPAYNNRVSKTAQIALAQANDSRAPGQPQGQHAASQSPYPQAQNSPGPSQAPAANVTVACQNCGTTITPLWRRDDNGHTICNACGLYYKLHGVHRPSGMKKSEIKRRRRVMPATSDQHLAPFSVNNTQPISPPPEPAAPRSVPPFYPQSQHQQQHQHADHSHSH…	554	59.7093	9.274	50.49	-0.925	0(N)	Cytoplasm|Nucleus	2	PF00320;PF00320	GATA zinc finger;GATA zinc finger	CSNCGTTRTPLWRRSPAGDTICNACGLYLKARNQ;CQNCGTTITPLWRRDDNGHTICNACGLYYKLHGV	127;295	160;328	1e-10;6.8e-13	2	CSNCGTTRTPLWRRSPAGDTICNAC;CQNCGTTITPLWRRDDNGHTICNAC	Type IVa;Type IVa
51	EnsemblFungi	Ascomycota	Dothideomycetes	Dothideales	Aureobasidium namibiae CBS 147.97	Anam5	KEQ72891	MAPSSSTTSSAVHSLTSASTLDSPTESSARRALRDSVFESATWREPDAETPEELQRKDPLGTQIWKLYSKTRNTLPNSERMENLTWRMMSMNLRRAQHQSRLAHAYQQRANAPSGIAQLRQSAEAQSQSQSHSHFPIPTNDHMNLDDFIVPSSIASPISQPSPPASFDPSTTTVDPKATPTGIPIRRHQQLQDEAQDDFVVRASAPSVAPTAINKTTDEFGYIQRHVRKTSIDERRPPKRRADCSPQVPPVTTGMHNDALLNNYSLDSTAFNPDMTQSQVPFGLDTFAFDTGASSIHNDPLLTSAGPFQANFNFSPVGSPMMNNGPYANMFNQSVMSNNYCSPPQSSYQSRVSTPQPIPEHEPVFFNTSSSVDLRHHAHMSSYTSQQPTPVASMQPQYI…	843	90.9249	7.751	52.16	-0.689	0(N)	Nucleus	2	PF08550;PF00320	Nitrogen regulatory protein areA, GATA-like domain;GATA zinc finger	IWKLYSKTRNTLPNSERMENLTWRMMSM;CTNCFTQTTPLWRRNPEGHPLCNACGLFLKLHGV	64;620	91;653	5e-09;6.5e-13	1	CTNCFTQTTPLWRRNPEGHPLCNAC	Type IVa
52	EnsemblFungi	Ascomycota	Dothideomycetes	Dothideales	Aureobasidium namibiae CBS 147.97	Anam6	KEQ74377	MPSNLHNEVEALSIDRSSGFRQKLVDGIEDLLLVLAEDGRVLYASPKSYSLLQIKPETLVGKYISTYMNVDDIPVFLIEWKDNMASGNSWRSHHRLRRNDDSYKPFESTFKPYTNVSVDDKTGSRISTKMCLMTSRPYQISSTSLMDSFLEHYITNIRLSNQVARLKGEAEHFYRDTISTPTPCNQDPDTTAQYAISRKASPPAPLSTSESAVSRKRSLSESTTSTKPQVDSVMGDMGIEIIPSRLQTMEETGAWTPKPRTKKKKPDLEQEFLCKECGTTDSPEWRKGPHGLKTLCNACGLRWSKTQKRPTSLQNEAGSSQ	321	36.1254	8.611	67.13	-0.703	0(N)	Nucleus	1	PF00320	GATA zinc finger	CKECGTTDSPEWRKGPHGLKTLCNACGLRWSKTQ	274	307	9e-10	1	CKECGTTDSPEWRKGPHGLKTLCNAC	Type IVb
53	EnsemblFungi	Ascomycota	Dothideomycetes	Dothideales	Aureobasidium namibiae CBS 147.97	Anam7	KEQ77353	MSGYNPYASGHGHQGDGMQQMDMSANGQIMAQGPVMDAMPGHSLDDIVSQNAKLMRRQSMSQGFHPGQQQQQQQQLPQTQPMDTDDPRRMSMMEFTGTSPTGPLESYQFSLPNSDMVDATAFMAASQVNPAMASRQSSIGGADLAIDNGFAPTSSYMPMMPPTSSYQSPANLSNNIDMDLNSPYINTPMHMSSLGYNSPNIDRPAPMYSHNSYHGMMNSPLHTSVPSHMYRQSSEPGGNPNPPKRPSLEHSHSRSSTSQTMQNTHQQSRQPTPQRQNSRPSQNSRQHSGFKAQPQNPQPGSRQDVGMDRGRNTNSKPDRSPDPSKYNPNNQGFNWPTPEGGWPSTMTGKPHMHSQYKNAYSSTGFDMLGVLMRVATRPNPEINIGSVDLSCAFVVCDAE…	1064	117.9	9.001	57.57	-0.777	0(N)	Nucleus	3	PF13426;PF08447;PF00320	PAS domain;PAS fold;GATA zinc finger	FVVCDAEKDDFPIVYCSDNFERLTGYTRHMILGRNCRFLQSPDGNVEAGVRRKYVDDDSVLYLKNMINLRREAQISLINYRRGGQPFMNLLTMIPISWDTDQVKFFVGFQVDL;ISPSASKVLEYEPGEIIGTALSSICHPSDIVPVTRDLKDTSTGASVNVVFRIRRKNSGYMWFEGHGSLHTEQGK;CANCHTRVTPEWRRGPSGQRDLCNSCGLRWAK	393;600;934	505;673;965	9.1e-14;1.1e-06;3.1e-10	1	CANCHTRVTPEWRRGPSGQRDLCNSC	Type IVb
54	EnsemblFungi	Ascomycota	Dothideomycetes	Dothideales	Aureobasidium namibiae CBS 147.97	Anam8	KEQ77637	MSFAAPSHHQHDDGQSQSNMSGIGAGPLPTGFGMGPPSNAGNTLTEFTKRRNWSQRVIEELRDFLHILTPDGRILYVSPSAKTLTGYEPRYLVGKFIGEFVHPEDSGIFMREFNESIASGNPLRFFYRFKREDGTYIIFECDGHPHISSDQGGYGHMSGSGQGAMSASGLCRGFFMMARPYPTKNAALLDSFLEHKMENERLKKRIEELKREEVEENQQQERQWQEQSRRDPSEAGRVEGSSEHSKTPNYQGMPPPAKPPISNTALTRQNLDSALSAQQPDSIADKMSRYEGSNHLETIEMLTGLRYRDGERSHGISTGDTSPALIRGDAGIAILLDRDRDGTKEKKKKLKVAEEYVCADCGTLDSPEWRKGPKGPKTLCNACGLRWAKKEKKRAVGDS…	424	46.8548	7.218	57.12	-0.825	0(N)	Nucleus	2	PF08447;PF00320	PAS fold;GATA zinc finger	ILYVSPSAKTLTGYEPRYLVGKFIGEFVHPEDSGIFMREFNESIASGNPLRFFYRFKREDGTYIIFECDGHPHISSDQGGYGHMSG;CADCGTLDSPEWRKGPKGPKTLCNACGLRWAKKEKK	74;358	159;393	1.8e-11;2.1e-11	1	CADCGTLDSPEWRKGPKGPKTLCNAC	Type IVb
55	EnsemblFungi	Ascomycota	Dothideomycetes	Dothideales	Aureobasidium pullulans	Apul1	THY37299	MSNPATTLAPSPVAGPRLSTERSKEELELAERLIEHSQGIQHAPPIADRRTTPSTADGGSRSGGDVERLSDDGGSETSLSAQQQQLTPQHSHHQQQQNLQLPSIHELTWVKQRKPFNTGMGGAGQVCSNCGTTRTPLWRRSPAGDTICNACGLYLKARNQMRPVNLKRGAQAPAAGQQQQQQDQQTTASGNRKSSSPSAKQLGGATYVADTTSNGTCPGGGRCNGTGGHDGCNGCPAYNNRVSKTAQIALAQANDSRAQGQPQGQHAASQSPYPHAQHSPGPSQVPAASVTVACQNCGTTITPLWRRDDNGHTICNACGLYYKLHGVHRPSGMKKSEIKRRRRVMPATNDQHLAPFSVNNTQPISPPPEPAPPVQRSVPPFYPQPQQQHQHPEHSHPHH…	549	59.0018	9.274	53.99	-0.859	0(N)	Nucleus	2	PF00320;PF00320	GATA zinc finger;GATA zinc finger	CSNCGTTRTPLWRRSPAGDTICNACGLYLKARNQ;CQNCGTTITPLWRRDDNGHTICNACGLYYKLHGV	127;294	160;327	1e-10;6.7e-13	2	CSNCGTTRTPLWRRSPAGDTICNAC;CQNCGTTITPLWRRDDNGHTICNAC	Type IVa;Type IVa
56	EnsemblFungi	Ascomycota	Dothideomycetes	Dothideales	Aureobasidium pullulans	Apul2	THY42167	MGEMMAPSSSTTSSAVHSLTSASTLDSPTESTRRALRDSVFESATWRETDGESPEELQRKDPLGTQIWKLYSKTKNTLPNSERMENLTWRMMSMNLRRAQHQSRLAHYQQRANAPSGIAQLRQSAEAQSQSQSQSHFPAPTHDHMNLDDFIVPSSIASPISQPSPPASLDPATSEFKATPTGIPIRRHQQLQEEAQDDFVARASAPSVAPTAVNKSTDEFGYIQRHVRKTSIDERRPPKRRADCSPQVPPVTTGMPNDALLNNYSLDSGAFNPPNTHGQVPFGLDTFGFDTGANSNHNDPLLSSAGPFQTNFNFSPVGSPMMNNGPYTNMFNQAIMSNNYCSPPQSSYQSRVSTPQPIPEHEPVFFNTSSSVDLRHHAHMSSYTSQQPTPVASMQPQYI…	842	90.7978	7.751	47.46	-0.742	0(N)	Nucleus	2	PF08550;PF00320	Nitrogen regulatory protein areA, GATA-like domain;GATA zinc finger	IWKLYSKTKNTLPNSERMENLTWRMMSM;CTNCFTQTTPLWRRNPEGHPLCNACGLFLKLHGV	67;619	94;652	1.6e-09;6.5e-13	1	CTNCFTQTTPLWRRNPEGHPLCNAC	Type IVa
57	EnsemblFungi	Ascomycota	Dothideomycetes	Dothideales	Aureobasidium pullulans	Apul3	THY44991	MSAYNPYASGHGHPGDGLQQQMDVSTNGQIMGQGAGMDAMAGHSLDDIVNQNAKLMRRQSMPQVFHPQQQQQHQQPLPQHMDTDDPRRMSMMEFTGTSPTGPLESYQFSLPNSEMVDATAYMAASQANPNMQPQRRLSSTAGNDMAIDNGFGPTSSFMPMMPATSSYQSPAHLSNLDMDLNSPYINTPMHMSSLGYNSPNIDRPMSMYGHTPYHPGMMNSPMNTSMPNHMYAQSPEASGNPTPKRPSLENSHSRSSKSQSMQTPNPHSRGPTPQRQNSNRPPQNQRQHSGFRAQPQNPPPGSRQDVGMDRGRSSDATNTPQVDPSRYNPNNQGFNWPVPEGGWPSTMTGKPHMHSQYKNAYSSTGFDMLGVLMRVATRPNPEINIGSVDLSCAFVVCDA…	1069	118.398	8.96	57.19	-0.76	0(N)	Nucleus	3	PF13426;PF08447;PF00320	PAS domain;PAS fold;GATA zinc finger	FVVCDAEKDDFPIVYCSDNFERLTGYTRHMILGRNCRFLQSPDGNVEAGVRRKYVDDDSVLYLKNMINLRREAQISLINYRRGGQPFMNLLTMIPISWDTDQVKFFVGFQVDL;ISPSAVKVLEYEPGEIIGTALSSICHPSDIVPVTRDLKDTSTGASVNVVFRIRRKNSGYMWFEGHGSLHTEQGK;CANCHTRVTPEWRRGPSGNRDLCNSCGLRWAK	394;601;936	506;674;967	9.2e-14;2.2e-06;3e-10	1	CANCHTRVTPEWRRGPSGNRDLCNSC	Type IVb
58	EnsemblFungi	Ascomycota	Dothideomycetes	Dothideales	Aureobasidium pullulans	Apul4	THY50695	RLPTSPTRRPRISRRNCLWTHGIGLDKTRTPSALHHQRNELCILKYPHSNIRPVCNTRHDSSPPCRNMNMDTSDRQRQDWTSPQPSPIEHSTNKQFRAALPPIKMLDIDKIKREEAEYQARGTNMNMAPSAVNSPTIPYPSGPPPPYSRPSYPDARTPPEARRPSQEDPSKQANKQSLPSIHEALGVEQSASYPPAAHRPYSSAPQPAYHAPVTAPAPPSPVSARRSFAAMEPPPPPQSAGFVHAPRSPYTQPHQDVSPRHMSEHQERQRSAYAPQPPPSLQPGQSPLAHQSQYPRSYSVAGPSPSHERTASHPLSMPPAAPPPAPHHPLPYGYAPAPAPAPYPSQYAYPPSAPHPAATTSSIYQPSITQPAPPQNSEPGRAPFGDSVKRHLDMWDFGE…	576	63.5522	9.563	46.28	-1.008	0(N)	Nucleus	1	PF00320	GATA zinc finger	CHSCNRAETPEWRRGPDGARTLCNACGLHYAKL	518	550	2.2e-10	1	CHSCNRAETPEWRRGPDGARTLCNAC	Type IVb
59	EnsemblFungi	Ascomycota	Dothideomycetes	Dothideales	Aureobasidium pullulans	Apul5	THY57392	MLDPSANLMSDLQDQINMLPMDLDLNDPNLDVSLSNVPFADPSAFGNNPNSMSLAPPNHQQHDDGQPHANNMSAIGAGPLPTGFGMGPPSNGGNTLTEFTKRRNWSQRVIEELRDFLHILTPDGRILYVSPSAKTLTGYEPRYLVGKFIGEFVHPEDSGIFMREFNESIASGNPLRFFYRFKREDGTYIIFECDGHPHISSDQGAYGHMSGSGQGAMSASGLCRGFFMMARPYPTKNAALLDSFLEHKIENERLKKRIEELKREEAEENQVQERQWQDQSRRDPSEAGRVDGSSEHGKTPNYQGMPPPAKPPISNTALTRQNLDSALSAQQPDSIADKMSRYEGSNHLETIEMLTGLRYRDGERSHGISTGDTSPALIRGDAGIAILLDRDRDGNKEKK…	476	52.3188	5.95	62.37	-0.76	0(N)	Nucleus	2	PF08447;PF00320	PAS fold;GATA zinc finger	ILYVSPSAKTLTGYEPRYLVGKFIGEFVHPEDSGIFMREFNESIASGNPLRFFYRFKREDGTYIIFECDGHPHISSDQGAYGHMS;CADCGTLDSPEWRKGPKGPKTLCNACGLRWAKKEKK	126;410	210;445	2.4e-11;2.4e-11	1	CADCGTLDSPEWRKGPKGPKTLCNAC	Type IVb
60	EnsemblFungi	Ascomycota	Dothideomycetes	Dothideales	Aureobasidium pullulans	Apul6	THY61590	MDVYRPKSSMGLHYPVTLTPPIYAEDRQFFAHMGHEIPRPSSAAPMYTGPQYSVPQRSFSGPMQLPGLSSLGQFGANPMAMMPRTSNVMHTMNYATSAPAATAGGQQNGPPVCQNCGTSTTPLWRRDEMGSVLCNACGLFLKLHGRPRPISLKTDVIKSRNRVKTATGPKKKPSLESPGFHADINTPIGSYPQRRHSDRMSSGEHHRSPSPSSRTNTPGMVSHHNPNIAPQHVFDNVSLAESSFQPSGLPTFALRQPSPAPSVNGMHPEHAHQYSENNSSLKTRVSELEVINDLFRGRVAELEQSEQDARAKEASARDAADQYKADLDAALIRESALKRTVESLEAEIESYKSQAAPPSKRLRLSDVVRDDSTSVDAQPAAPESTPVAA	389	42.2959	8.809	59.77	-0.654	0(N)	Nucleus	2	PF00320;PF25026	GATA zinc finger;Asd-4-like domain	CQNCGTSTTPLWRRDEMGSVLCNACGLFLKLHGR;AHQYSENNSSLKTRVSELEVINDLFRGRVAELEQSEQDARAKEASARDAADQYKADLDAALIRESALKRTVESLEAE	113;271	146;347	6.1e-12;1.5e-24	1	CQNCGTSTTPLWRRDEMGSVLCNAC	Type IVa
61	EnsemblFungi	Ascomycota	Dothideomycetes	Dothideales	Aureobasidium subglaciale EXF-2481	Asub1	KEQ92863	MASGSCVPTDDLPTNASVDLYQEITDGIQDLLLVLTEDGRILHASTASHSLLQTAPRSLIGRYIATCMSVDDMPAFLLDYDANMEAGRSWRYYHRLRRADKSFVPFDSTFKSYTGDVTLGGVLLENTRMCLVTAKPYKLPNTSLMDSFLEQCTEQARLINKVQHLRREESEESDAESATARRVLMHHAEDTKTTGSDDSQDDPEIINGKPRVDSAIGDEGIGMAPSRVQLAFDTGYWIAKPRAMKRKLQDQKAHLCNDCGSIASTEWRKGPLGAKTLCNACGLRWAKSQKVIEGRKIKVEEEQEDLNMLGEV	312	34.7219	5.375	78.53	-0.48	0(N)	Cytoplasm|Nucleus	1	PF00320	GATA zinc finger	CNDCGSIASTEWRKGPLGAKTLCNACGLRWAKS	256	288	1.6e-07	1	CNDCGSIASTEWRKGPLGAKTLCNAC	Type IVb
62	EnsemblFungi	Ascomycota	Dothideomycetes	Dothideales	Aureobasidium subglaciale EXF-2481	Asub2	KEQ93538	MGQGASMDAMAGHSLDDIVSQNAKLMRRQSMPQSFHSAQQQQQQQQQQQQQQAQAQPQQAQPMDTDDPRRMSMMEFTGTSPTGPLEAYQFSLQNPDMVDATAFMAASQSHSHPTLQRRQSSTGGVGGGGDMALDNGFAPTSSFMPMMPPTSSYQSPANLSNMDMDLNSPYINTPMHMSSLGYNSPNIERQMPMYSHNSYHGMMNSPLNTSVPNHMYAQSPDAGGNPNPPKRPSLENSHSRSSNSQTMQPSHRHSRQPTPQRQNSSRPQQPQRQPSGFPAQPQNPQPGSRQDVGMDRGRHGDSGVGPQPDASRYNPNNQNFNWPTPEGGWPSTMTGKPHMHSQYKNAYSSTGFDMLGVLMRVATRSNPEINIGSVDLSCAFVVCDAEKDDFAIVYCSDNF…	967	107.332	9.069	57.39	-0.75	0(N)	Nucleus	3	PF13426;PF08447;PF00320	PAS domain;PAS fold;GATA zinc finger	FVVCDAEKDDFAIVYCSDNFERLTGYTRHMILGRNCRFLQSPDGNVEAGVRRKYVDDDSVLYLKNMINLRREAQISLINYRRGGQPFMNLLTMIPISWDTDQVKFFVGFQVDL;ISPSASRVLEYEPGEIIGTALSSICHPSDIVPVTRDLKDTSTGASVNVVFRIRRKNSGYMWFEGHGSLHTEQGK;CANCHTKVTPEWRRGPSGQRDLCNSCGLRWAK	380;587;921	492;660;952	2.2e-13;6.5e-07;1e-10	1	CANCHTKVTPEWRRGPSGQRDLCNSC	Type IVb
63	EnsemblFungi	Ascomycota	Dothideomycetes	Dothideales	Aureobasidium subglaciale EXF-2481	Asub3	KEQ93835	MAGGVSASDMLDPSANLMSDLQDQINMLPMDLDLNDPSLDVSLSNVPFADPSAFGNNQNSMSLAAQTLHQHDDGQGNHMSGIGAGPLPTGFGMGPPSNGGNTLTEFTKRRNWSQRVIEELRDFLHILTPDGRILYVSPSAKTLTGYEPRYLVGKFIGEFVHPEDSGIFMREFNESIASGNPLRFFYRFKREDGTYIIFECDGHPHISSEQSAYGHMSGSGQGAMSAAGLCRGFFMMARPYPTKNAALLDSFLEHKIENERLKKRIEELKREEVEENQVQERQWQEQSRRDTSEAGRVEGSSEHSKTPNYQGMPPPAKPPISNTALTRQNLDSALSAQQPDSIADKMSRYEGSNHLETIEMLTGLRYRDGERSHGISTGDTSPALIRGDAGIAILLDRDR…	483	52.9696	5.866	63.69	-0.699	0(N)	Nucleus	2	PF08447;PF00320	PAS fold;GATA zinc finger	ILYVSPSAKTLTGYEPRYLVGKFIGEFVHPEDSGIFMREFNESIASGNPLRFFYRFKREDGTYIIFECDGHPHISSEQS;CADCGTLDSPEWRKGPKGPKTLCNACGLRWAKKEKK	133;417	211;452	5.4e-11;2.5e-11	1	CADCGTLDSPEWRKGPKGPKTLCNAC	Type IVb
64	EnsemblFungi	Ascomycota	Dothideomycetes	Dothideales	Aureobasidium subglaciale EXF-2481	Asub4	KEQ95180	MEYSFRIDMKDTPTDSSSELQRKVLDGIEDLLLVLAEDGRVLYASPQSFKLIQVKPEALVGSYVSTHMNVDDIPVFLLDFKENMATGNAWRSHHRLRRKDDTYLPFESTFKPYTDTTMDKKLGTKQDTKLCLMISRPYQMSSTSLMDSILEHHTTHIRLTKQLARLHGEIEECRDSTTPTIPHNQNSSTTKHATISIETMSPNKPAGRPNSPIGLSTFGSAFSRKRSLSVSSTSTKPQVDSVLGDVGIEIATSRLRDAHETGAWRTKPRTKKPKIETLTEYLCTDCGIANSPEWRRGPCGPKTLCNACGLRWSKAHKEPNSKIKETGSSIQ	331	37.0857	8.959	70.42	-0.631	0(N)	Nucleus	1	PF00320	GATA zinc finger	CTDCGIANSPEWRRGPCGPKTLCNACGLRWSKAH	283	316	3.6e-08	1	CTDCGIANSPEWRRGPCGPKTLCNAC	Type IVb
65	EnsemblFungi	Ascomycota	Dothideomycetes	Dothideales	Aureobasidium subglaciale EXF-2481	Asub5	KEQ96573	MGEMTAPSSSTTSSAVQSLTSASTLDSPTESSARRALRDSVFESTTWRETDGESPEELQRKDPLGTQIWKLYSKTKNTLPNSERMENLTWRMMSMNLRRAQHQSRLAHAYQQRANAPSGIAQLRQSAEAQSLEHSNSHSLDQSHFAVPASDHMNLDDFIVPSSIASPISQSSPSASLDTLINDPKATSTGIPIRRHQQLQEEAQDDFVARASAPSVAPTAIHKTTDEFGYIQRHVRKTSIDERRPPKRRADCSPQVPPVTTGMPNDALLNNYSLDSGAFNPPNTHGQVPFGLDTFGFDTGANASHNDPLLTSAGPFQTNFNFSPVGSPMMTNGQYTNMFNQSIMSNNYCSPPQSSYQSRVSTPQPIPEHEPVFFNTSSSVDLRHHAHMSSYTSQQPTPV…	850	91.7977	6.92	49.66	-0.742	0(N)	Nucleus	2	PF08550;PF00320	Nitrogen regulatory protein areA, GATA-like domain;GATA zinc finger	IWKLYSKTKNTLPNSERMENLTWRMMSM;CTNCFTQTTPLWRRNPEGHPLCNACGLFLKLHGV	68;627	95;660	1.6e-09;6.5e-13	1	CTNCFTQTTPLWRRNPEGHPLCNAC	Type IVa
66	EnsemblFungi	Ascomycota	Dothideomycetes	Dothideales	Aureobasidium subglaciale EXF-2481	Asub6	KEQ96690	MSNPSTILAPSPAAGARLSNERSKEELELAERLIEHSQGIQHGPTIADRRTTPSTVDGGSRSGGDVERLSDDGGSETSLSAQQQQQQLTPQHSHHQQQQQNLQLPSIHELTWVKQRKPFNTGMGGAGQVCSNCGTTRTPLWRRSPAGDTICNACGLYLKARNQMRPVNLKRGAQTSPSGQQQQQEQSTTASGNRKSSSPSAAKQLGGATYVADTTSNGTCPGGGRCNGTGGHDGCNGCPAYNNRVSKTAQIALAQANDSRAHGQPPGQHAASQSPYPHAQNSPGPGPSQAPAANVTVACQNCGTTITPLWRRDDNGHTICNACGLYYKLHGVHRPSGMKKSEIKRRRRVMPATNDQHLAPFSVNNSQPISPPPEPAAQRSVPPYYPQSQQQHHPEHSHA…	556	59.8155	9.319	52.09	-0.902	0(N)	Cytoplasm|Nucleus	2	PF00320;PF00320	GATA zinc finger;GATA zinc finger	CSNCGTTRTPLWRRSPAGDTICNACGLYLKARNQ;CQNCGTTITPLWRRDDNGHTICNACGLYYKLHGV	130;299	163;332	1e-10;6.8e-13	2	CSNCGTTRTPLWRRSPAGDTICNAC;CQNCGTTITPLWRRDDNGHTICNAC	Type IVa;Type IVa
67	EnsemblFungi	Ascomycota	Dothideomycetes	Dothideales	Aureobasidium subglaciale EXF-2481	Asub7	KEQ97768	MHTMNYATSAPAATAGGQQNGPPVCQNCGTSTTPLWRRDEMGSVLCNACGLFLKLHGRPRPISLKTDVIKSRNRVKTATGPKKKPSLESPGFHHDPNMSMGAYPPQRRESDRMSSGEHHRSPSPTSRTNAPAHVVHHNPNIAPQHVFDNVSLAESSFQPTGLPTFALRQPSPAPSANGMHPEHAHPYSENNSSLKTRVSELEVINDLFRGRVAELEQSEQDARAKASAARDAADQYKADLNAALTRESSLKKQFEALEAEFEQYKAHNAPPSKRLRLSDVVRDDSPSADSKPVESTTTTVAA	302	32.8812	8.857	56.66	-0.799	0(N)	Nucleus	2	PF00320;PF25026	GATA zinc finger;Asd-4-like domain	CQNCGTSTTPLWRRDEMGSVLCNACGLFLKLHGR;YSENNSSLKTRVSELEVINDLFRGRVAELEQSEQDARAKASAARDAADQYKADLNAALTRESSLKKQFEALEAE	25;187	58;260	4.3e-12;7.599999999999999e-24	1	CQNCGTSTTPLWRRDEMGSVLCNAC	Type IVa
68	EnsemblFungi	Ascomycota	Dothideomycetes	Dothideales	Aureobasidium subglaciale EXF-2481	Asub8	KER00831	MNVESSDRQRQDWPQRQHSPVERLTNKQCRAALPPIKLLDIDKIKREEAEYQARGTTFNMAPSSVNSPTIAYPSGPPPPYSRPSYPDARTSPEARRHSVEDSSKQGNKQSLPSIHEALGVEQRASYPPTAHRPYSSAPQSAYRAPATASAPAPASPVSARRSFAAMDPPPPPQPVVFTHGPRSPYAQPQHEISPRQMPEQQERQRSAYAPQPPVSRPGQSPLAHQSQYPRSYPATGPSPSHERTASHPLSMPPVAPPPAIQHPLPYGYAPAPAPVQAPYPSHYAYPASASHSAATTSSIYQPSIVQPAPPQHSEPGRGPFGESVKRHLDMWDFGEALNEIAESSNYMLDFSRQCGARLHQSQRSEPAPGTLPQLQEIDHLMEKSRRQLDCYAKMREFII…	512	56.2729	9.47	47.85	-0.966	0(N)	Nucleus	1	PF00320	GATA zinc finger	CHSCNRAETPEWRRGPDGARTLCNACGLHYAKL	454	486	1.9e-10	1	CHSCNRAETPEWRRGPDGARTLCNAC	Type IVb
69	EnsemblFungi	Ascomycota	Dothideomycetes	Gloniales	Glonium stellatum str. CBS 207.34	Gste1	OCL04715	TCTNCFTQTTPLWRRNPEGYPLCNACGLFLKLHGVVRPLSLKTDVIKKRNR	51	5.86086	9.951	80.2	-0.382	0(N)	Nucleus	1	PF00320	GATA zinc finger	CTNCFTQTTPLWRRNPEGYPLCNACGLFLKLHGV	2	35	2.1e-14	1	CTNCFTQTTPLWRRNPEGYPLCNAC	Type IVa
70	EnsemblFungi	Ascomycota	Dothideomycetes	Gloniales	Glonium stellatum str. CBS 207.34	Gste2	OCL05303	MYQNGSSLPGDVYQNTSLIPGLDVDMMQMEMDLSQIDPDSQSQPTQSYNTPITPQQQLVQPTGGAVDPNDAYAVMQNTSMSGAGAGPLPTGFGAQSMNTSGSTLTEFTKRRNWSQRVLEELRDFLHILTPDGRVLYVSPSCKYLTGYDPTQLVGRFIGDFIHPDDSGIFVREFNESIASGNPLRFFYRFRKEDGSWAIFESHGHPHLSSEAAAFGPNNGSTFCRGFFMMSRPYPTKNAALLDSFLEHKIENERLTKRIAELKREEQEEQEAQERHWLKKAEGHSSVTPSETQRTDIRSDGDTATSTAYNSMPPPAKPAISNTALTRQNLDEALAASKPDSINDKMARYEGATHLETIEMLTGLRYRDGERSQGISTGDASPLLIRGDVGIQISLDKDGR…	475	52.3837	5.774	60.25	-0.722	0(N)	Nucleus	2	PF08447;PF00320	PAS fold;GATA zinc finger	LYVSPSCKYLTGYDPTQLVGRFIGDFIHPDDSGIFVREFNESIASGNPLRFFYRFRKEDGSWAIFESHGHPHL;CTDCGTLDSPEWRKGPNGPKTLCNACGLRWAKKEKK	135;416	207;451	1e-10;1.5e-11	1	CTDCGTLDSPEWRKGPNGPKTLCNAC	Type IVb
71	EnsemblFungi	Ascomycota	Dothideomycetes	Gloniales	Glonium stellatum str. CBS 207.34	Gste3	OCL06797	METLDAGSRQSVGLPSINYLDSDKIKREDVDYQRKHSAATMVSTSYSFPCPPPSFNSHQSTNANSVSGALSGLISPPESRRTSGDEKEQRQPERQPARQSLPSIHEALGPDQPLSYPVPPSSAPVSTSQHYQPPAATSSPSDQSRRTYSTDLHSQGPPNPYSHPRSPYMNSQAPSASGPPLHPPPEPLPRPPFSSAPHNNSKLPTLHPLRTTQSPPMNSVRPNAPYPYPQQPPSAYEPAPHSAGSMNPHYGYSPYPSQYPYSAPPPSASGTTYPPSAAYSAPPRYPPPSWRSDGSEASRVEENKRAGRLVGAPYGESVKRHLDNFDLEASLNEIAEGSGRLLDFTKHYRQRAHESQRTGMTPASIPTLAEVDELMKQETRIAESLARIREVVVNQQAAL…	511	55.3164	9.138	46.14	-0.988	0(N)	Nucleus	1	PF00320	GATA zinc finger	CHSCNRAETPEWRRGPDGARTLCNACGLHYAKL	451	483	1.9e-10	1	CHSCNRAETPEWRRGPDGARTLCNAC	Type IVb
72	EnsemblFungi	Ascomycota	Dothideomycetes	Gloniales	Glonium stellatum str. CBS 207.34	Gste4	OCL07293	MSGAQYGERGGGLRASALSEALNAPAIGGLADPQFFPTSSSPKHVRFPPGHFDNSSGSSSTIQSLTSSSTLDSKLDFSPSEAAARKGMLQDSIFPTWKDDAGDADLGSPEEMQKKDPLATQIWKLYSKAKTQLPNAERMENLTWRMMAMSMKKRAEQQREGLSRKTTTTTAATALTSFTSAPSAPNTLSAPSGIAQLRKSIDQQAQAQQSQSDAMNLDDFIFPSSVASPAGLSPSPSNERTASSNATAPAIPIRKTSQMNDQNLHLIRASAPSVPPTITRETEFGYIQRHVRKTSIDERRPRKRPADCSPQVPAVNSIMIPNDPDAEAALNHYSLDQPMQQPSFQHHASQPQVPFAIDTFQLNEDPIISSAGPFQQQFTFSPVGSPLMNQGGPYSAMYN…	938	99.5312	8.813	52.03	-0.692	0(N)	Nucleus	2	PF08550;PF00320	Nitrogen regulatory protein areA, GATA-like domain;GATA zinc finger	IWKLYSKAKTQLPNAERMENLTWRMMAM;CTNCFTQTTPLWRRNPEGHPLCNACGLFLKLHGV	122;706	149;739	1e-09;7.3e-13	1	CTNCFTQTTPLWRRNPEGHPLCNAC	Type IVa
73	EnsemblFungi	Ascomycota	Dothideomycetes	Gloniales	Glonium stellatum str. CBS 207.34	Gste5	OCL08607	MSAAISAGGGASLAPTPAHPHQLSRQPSKEDLEMAENLNLLNHSQDRHPTRRDSNTRTDAANSAVSDGQSANSPVNAPEISEYHSLEDTLNYQRPSQPEQSPTQTAAAAAAMQQRAQTSNAPVTGQICSNCGTTRTPLWRRSPTGETICNACGLYWKARNQSRPTNLKRNVQPSVLTVQQNTNAGQPHDRSTSPSAFTGSPRATYVAADQVATGTCPGGGRCNGTGGQQGCNGCPAYNNRVSKTAQFALAQTSAQQSIGSPQASADASGPAGNDNMASQTSLAPGQNTASVIPACQNCGTTITPLWRRDESGHTICNACGLYYKLHGLHRPVAMKKQEIKRRKRVVPAAPDTSQQQQQQQQQ	362	38.3657	9.148	51.93	-0.81	0(N)	Nucleus	2	PF00320;PF00320	GATA zinc finger;GATA zinc finger	CSNCGTTRTPLWRRSPTGETICNACGLYWKARN;CQNCGTTITPLWRRDESGHTICNACGLYYKLHGL	128;295	160;328	2.2e-11;1.2e-12	2	CSNCGTTRTPLWRRSPTGETICNAC;CQNCGTTITPLWRRDESGHTICNAC	Type IVa;Type IVa
74	EnsemblFungi	Ascomycota	Dothideomycetes	Gloniales	Glonium stellatum str. CBS 207.34	Gste6	OCL11954	MNGYPPFSRQFATDNRGNMMNVAGGQDDMSAYNMVGGQSLDDIVNQNTKAMRRNSVPIHYSGNPAPMNDQEIRRMSMMDFTGAISGGSLDSFQFDPSGNSTMDGIMRTGGQYSRPTGDNTRRRPSNTDLALNTQFANQASPFTSIPPPGSTYASPLNPNPSLDMDITSPYNANGLPMPLDMSDPSLGAMMGNDLALFTQPAFSSPMMNSPVNQDFAASIQATTQEPTNPILPPTEQFVARSENTTPDVRSALPSRTNSQEQSVRSSSRPQSIPLSNQSSSSQIPTTSAFGPEPPSQTQTTMEIVNRQKFPWITPPEGFPSTMHNRPHMESQYKNAYSSTGFDMLGVLMRVATRPNPEINIGSVDLSCAFVVCDAQLVDFPIVYCSENFERLTGYNKHMI…	1053	115.713	8.466	64.45	-0.605	0(N)	Nucleus	3	PF13426;PF08447;PF00320	PAS domain;PAS fold;GATA zinc finger	FVVCDAQLVDFPIVYCSENFERLTGYNKHMILGRNCRFLQSPDGKVEAGVKRKYVDDDSVLYLKNMINMRREAQISLINYRRGGQPFMNLLTMIPITWDNTEEIKFFVGFQVDL;LYLSPSSRKVLEYEASELVGTALSSVCHPSDIVPVTRELKDTSSGASVNVVFRIRRKRSGYMWFEGHGSLHTEQGK;CANCHTRVTPEWRRGPSGNRDLCNSCGLRWAKQN	369;575;925	482;650;958	3.6e-13;4e-06;1.8e-10	1	CANCHTRVTPEWRRGPSGNRDLCNSC	Type IVb
75	EnsemblFungi	Ascomycota	Dothideomycetes	Gloniales	Glonium stellatum str. CBS 207.34	Gste7	OCL14981	MTYATSAPATSGGQGNSPPVCQNCTTSTTPLWRRDESGSVLCNACGLFLKLHGRPRPISLKTDVIKSRNRVKTTGQGPRKKPSSDANGLPAAHPDADPTLSALAQHRRTSQKISSGTSDRSNSPISRTGTPGLQHPSNIAPQHMFDGVIDSHTFHSPSLPSFNIRQPSPGSTSSVNGSHLEPPLPYDALLAQNTQLKTRVSELEVINDLFRGRVTELEHSEQDARRAEMASRETEANLRAELEEVRQRENDLKRRLEELESEGPRHKKMRLSDIVDESRASTPLSSTAEQSG	292	31.853	8.72	64.52	-0.837	0(N)	Nucleus	2	PF00320;PF25026	GATA zinc finger;Asd-4-like domain	CQNCTTSTTPLWRRDESGSVLCNACGLFLKLHGR;YDALLAQNTQLKTRVSELEVINDLFRGRVTELEHSEQDARRAEMASRETEANLRAELEEVRQRENDLKRRLEELESE	21;186	54;262	8.4e-12;1.4e-29	1	CQNCTTSTTPLWRRDESGSVLCNAC	Type IVa
76	EnsemblFungi	Ascomycota	Dothideomycetes	incertae sedis	Zopfia rhizophila CBS 207.26	Zrhi1	KAF2176351	MNGFPSYPQRPFVPPDSGLNMMNMSGGQDGMNNFGVAEGQSLDDIVSQNEKAVRRRSMPMSYGAAPMQMDAPDTRRLSMMNFGGPSNGNLDDFQFNMSAGAPMDGIMRNDTYPQPSADAHNDRTRPNDLAINTQFSNQNSPFPSMPAQGSTYASPLHTNVSLDMDMTSPYPNAMSMPLDMTDPTLSMTGTDMNMFPGAQFNNPIIDSPVAQDFVGPLPGSKQDLTIANVQPRDQFGNGSMSGTCDVRSDMPSRANSQEQNSVRSNSRLHSEANSSSKSLPPQMSSAPLQRQEPVALPPQQDVAVEQLSQIKFPWRTPPGGFPSTMNSNPHMNTQFKNAYSSTGFDMLGVLMRVATRQNPEIDIGSVDLSCAFVVCDAQKDDNPIVYCSENFERLTGYSK…	1059	117.01	8.618	61.13	-0.692	0(N)	Nucleus	3	PF13426;PF08447;PF00320	PAS domain;PAS fold;GATA zinc finger	AFVVCDAQKDDNPIVYCSENFERLTGYSKHMILGRNCRFLQSPDGKVEPGVKRKYVDDDSVLYLKNMINMRREAQISLINYRRGGQPFMNLLTMIPIPWDSDEIKFFVGFQVDL;LYLSPSSNRVLEYDPSELVGTALSSVCHPSDIVPVTRELKETGNGTPVNVVFRIRRKKSGYMWFEGHGSLHTEQGK;CANCHTKTTPEWRRGPSGNRDLCNSCGLRWAKQ	371;577;928	484;652;960	1.6e-14;4.7e-07;1.6e-11	1	CANCHTKTTPEWRRGPSGNRDLCNSC	Type IVb
77	EnsemblFungi	Ascomycota	Dothideomycetes	incertae sedis	Zopfia rhizophila CBS 207.26	Zrhi2	KAF2180026	MANNSGSGGTSLAPTPTHPHQMSREPSKEDIEMAENLNLLTHARDPDTPRTEGQNRGTPATSPQEEQSEIYHSLEDTLHFQRSERPEQAPTPATTVSMGSKVVGGGNAPVTGQVCSNCGTGRTPLWRRSPTGETICNACGLYLKARNQSRPTNLKRNVQSQPILPVHQSPARRQGHGRSASPGNVAGSPRGATYVAADQVAGTCPGGGRCNGTGGQQGCNGCPAFNNRVSKTAQFALAQANAASEPSESANANDGAGPASAGSGTAGTSVLPACQNCGTTITPLWRRDESGHTICNACGLYYKLHGTHRPSAMKKQEIKRRKRVVPAMPDSASQTPSSVAGYSPKQRAIQTPVFEHSVSPDPSAAVESREQYPESSRAPLAVDFTNYYGSSLTSNPQGP…	519	55.2163	8.886	51.04	-0.88	0(N)	Nucleus	2	PF00320;PF00320	GATA zinc finger;GATA zinc finger	CSNCGTGRTPLWRRSPTGETICNACGLYLKARN;CQNCGTTITPLWRRDESGHTICNACGLYYKLHGT	115;274	147;307	3.4e-09;2.9e-12	2	CSNCGTGRTPLWRRSPTGETICNAC;CQNCGTTITPLWRRDESGHTICNAC	Type IVa;Type IVa
78	EnsemblFungi	Ascomycota	Dothideomycetes	incertae sedis	Zopfia rhizophila CBS 207.26	Zrhi3	KAF2182544	MPALTADQTANLVQGLDVDMMQMDMGLSQVNADSQSQPTQTFNTPYAPQQQLQPTVPGNVASDTFSLGQDNTMTGAGAGPLPTGFGAPSLNPSGSTLTEFTKRRNWSQRVLEELRDLLHILTPDGRIVYLSPSCKYLTGYEPQQLVGRFIGEFIHPDDGGIFVKEFNESIASGNPLRFFYRFRKDDGSWIIFESHGHPHLTNSGGAFNSPGMNCRGFFMMSRPYPTKNAALLDSFLEHKIENERLTKRIAELKREEQEEQEAQDRHWTKIAGGQASATPSETLRTDGRIESDGQAAAPYSGMPPPAKPGVSNTALTRQNLDEALASSRPDSINDKMARYEGATHLETIEMLTGLRYRDGERSKGISTGDASPLLIRGDAGIQIPLDRDGRTSSDKKKKL…	455	49.9013	6.24	63.34	-0.688	0(N)	Nucleus	2	PF08447;PF00320	PAS fold;GATA zinc finger	IVYLSPSCKYLTGYEPQQLVGRFIGEFIHPDDGGIFVKEFNESIASGNPLRFFYRFRKDDGSWIIFESHGHPHLTNSG;CTDCGTLDSPEWRKGPNGPKTLCNACGLRWAKKEKK	127;407	204;442	7.5e-12;1.4e-11	1	CTDCGTLDSPEWRKGPNGPKTLCNAC	Type IVb
79	EnsemblFungi	Ascomycota	Dothideomycetes	incertae sedis	Zopfia rhizophila CBS 207.26	Zrhi4	KAF2184050	TCTNCFTQTTPLWRQTPEGHPLCNACGLFLKIHGVVRPLSLKTDVIKKRNR	51	5.79377	9.793	80.2	-0.331	0(N)	Cytoplasm|Nucleus	1	PF00320	GATA zinc finger	CTNCFTQTTPLWRQTPEGHPLCNACGLFLKIHGV	2	35	1.8e-13	1	CTNCFTQTTPLWRQTPEGHPLCNAC	Type IVa
80	EnsemblFungi	Ascomycota	Dothideomycetes	incertae sedis	Zopfia rhizophila CBS 207.26	Zrhi5	KAF2185694	RSVGLPSINHLDSDKIKREEVEYQRKHSASAMVSPLHPFSGPPHSYSNHQSSNANSVPGTLGGLLSPPESRRTSGDEKESRPPARQSLPSIHEALGSEQPLPYPAPPPSAPVSASQPYLPPSSTTSPSDQRSRTYSADLHSQGPPNPFSHPRSPYMNAPASIAPPPPQTQTESLPRPSFSTTQQNPKLPTLHPLRTTQSPPAGASRPNLPYSSYPQQPASAFESSAPHSAGSMNPHYGYSQYPSQYPLSAPPPSGPGPVYPPSATYSAPPRYPPPSWRSDSAELSRVEEKQKAGRSSLAPYGESVKRHLESFDLEASLNEMAEGAGRIMEFSKIYRQRAHENQRIGMTPQSMPRLEEVEEMLKQSEKISMSLGRMREVVFNHQQASIVEPPQDHRYRQI…	1154	129.281	7.744	65.31	-0.731	0(N)	Cytoplasm|Nucleus	2	PF00320;PF03074	GATA zinc finger;Glutamate-cysteine ligase	CHSCNRAETPEWRRGPDGARTLCNACGLHYAKL;IYMDAMAFGMGSCCLQITFQAKNIEEGRKMYDQLSPLGPILLALTAATPVYKGFLADTDVRWNQISRAVDDRTPEELGEKPLKNDRWRLPKSRYASNSTYISQDPRLRKEYLDPNLVFDKDLKQRLLDGGMDDLLATHFAHLFIRDPIVVFAEDLKELDLQKADHFENIQSTNWQHMRFKPPPPGSDTGWRVEFRPMEIQITDFENAAFSIFIVLITRAILSYDLNFYIPIARVSENMETAHIRDAVSTQKFYFRKNPFPSRPIRSANGTSSPQANSRPPTPFGPVEDEYELMTINEVINGQQTGEGGFPGLIPLVENYLNSMNVDVETRCELARYLDLIRKRADGTLWTASKWIRHFVQAHPEY…	438;751	470;1136	5e-10;4.1e-174	1	CHSCNRAETPEWRRGPDGARTLCNAC	Type IVb
81	EnsemblFungi	Ascomycota	Dothideomycetes	incertae sedis	Zopfia rhizophila CBS 207.26	Zrhi6	KAF2190459	MSGAQYGERGGGLRTSALSDVFDAPAIGARADPQPFATSSPPKHVRFPPVPFDSSSGSSSTGQSLTSASTLSSKLDLTPSEAAARKGMLEDSIFPTLRNDAGDANIGNLEEMQKNDPLATQIWKLYSKAKTQLPNAERMENLTWRMMAMSMKRADLDRKGYVLVYFLRRVMNRKNEMNPPTTTAKCSTRATKPAPSGIAQLRKSINQQEQAQQPDAMNLDDFIFPSSVGSPAGLSPSPSNDRTTVPSNATAPAIPIRKANQSSHEPNLHFARASAPSVPPTVIRENEFGYVQRHVRKTSIDERRPPKRRAEASPQVPAVNSIMIPNDPEAEAALNQYTLDQPMQPPSFHHNTQPQVPFSIDTFQLNEDPIISSAGPLQQNFGFSPVGSPLMTQNTSYST…	938	99.8606	9.314	52.71	-0.705	0(N)	Nucleus	2	PF08550;PF00320	Nitrogen regulatory protein areA, GATA-like domain;GATA zinc finger	IWKLYSKAKTQLPNAERMENLTWRMMAM;CTNCFTQTTPLWRRNPEGHPLCNACGLFLKLHGV	122;708	149;741	1e-09;7.3e-13	1	CTNCFTQTTPLWRRNPEGHPLCNAC	Type IVa
82	EnsemblFungi	Ascomycota	Dothideomycetes	incertae sedis	Zopfia rhizophila CBS 207.26	Zrhi7	KAF2194292	MTYATAAPATSGGQGNSPPVCQNCTTSTTPLWRRDESGSVLCNACGLFLKLHGRPRPISLKTDVIKSRNRVKATGPGGRKKAAEANGLPAAHPDADPALSALVQHRRASGKISSGLSDRSQSPISRTGTPGLPHPSNIAPQHMFDGVLHSDAFHSPSLPSFNIRQPSPGSTSSVNGSHLEAPLTYEALVGQNTSLRTRVSELEVINDLFRGRVTELEQSEQEARRVEHAARETEAQLRAELEETRFREADLKRRLEELEGEGPRHKKMRLSDIVDESRAGTPVSSMAD	288	31.1184	8.734	69.51	-0.664	0(N)	Nucleus	2	PF00320;PF25026	GATA zinc finger;Asd-4-like domain	CQNCTTSTTPLWRRDESGSVLCNACGLFLKLHGR;TYEALVGQNTSLRTRVSELEVINDLFRGRVTELEQSEQEARRVEHAARETEAQLRAELEETRFREADLKRRLEELEGE	21;184	54;261	8.2e-12;3.3e-28	1	CQNCTTSTTPLWRRDESGSVLCNAC	Type IVa
83	EnsemblFungi	Ascomycota	Dothideomycetes	Microthyriales	Microthyrium microscopicum str. CBS 115976	Mmic1	KAF2664024	MAETPGTSTSNYGSTANQYAPDSRASESTTIQASLATTSSAMVPANEAGSAQVGAGPLPTGFGVPPAPGTGSTLTEFTKRRHWSRQILAELKDLLIILSPDGRMQYVSQSCKELTGHEPSSLKSRFLVDYVHPLDKSMVRREYNESIASQNQLRFFYRFEKADQQSYAIFEAYGHPHFGTEVLNSNSYNEGARICRGVFIVSRPYPEKNAHMLDSFLEHKIENERLLRKIEELKREEKEELEQEDQMISRRDGQTITTASDDQRTEPKTETDNGAPSSYDGMPPPPKPSISNTALTRQNLSEALAASRPDSINDKMARYEGATPIEHIEMLTGLRHGERSHGISTGAVSPALIKGDAGIAISTDREQRAGQEKKKKIKLADEYVCTDCGTLDSPEWRKG…	436	47.9669	6.585	62.75	-0.773	0(N)	Nucleus	2	PF08447;PF00320	PAS fold;GATA zinc finger	YVSQSCKELTGHEPSSLKSRFLVDYVHPLDKSMVRREYNESIASQNQLRFFYRFEKADQQSYAIFEAYGHPHF;CTDCGTLDSPEWRKGPNGPKTLCNACGLRWAKKEKK	106;385	178;420	4.5e-06;1.3e-11	1	CTDCGTLDSPEWRKGPNGPKTLCNAC	Type IVb
84	EnsemblFungi	Ascomycota	Dothideomycetes	Microthyriales	Microthyrium microscopicum str. CBS 115976	Mmic2	KAF2666950	MNPDVDLQKNHKEPRRQSVPPMAFSSGSDTVDPGMRRLSMVEYMNQQPSGSLSQFTFDPSMNPNFAQSMNNQYSNQMPEMEPKDISMTGLSVNTQYPSAMAFGQLSATSDVFPSPYDTDFNNPFPDNPGNMGLDMNTMMSDADISRMNDMFSAQQFGSPTFTAPMNGTFDNTVYGQQQSIGGENMENGAQLDTILTSTASRDFQMMPITTQASSYSQAAPLTTVTVSSAIASTADKRPATTSTASTKTKSSQPPKMSTIGGLSLPWSEPEGGWPSTMLGAKPHMETNQYRDIYAPSGYNLLDTLFRVHTRKNPQIQIGAVDLSCAFVVCDARSHDNPIIYCSDSFERLTGYNKYEIIGQNCRFLQSPDGKVESGVKRKYCDDDSVLYLKNSITTRTEAQ…	1028	113.168	8.075	65.08	-0.578	0(N)	Nucleus	3	PF13426;PF08447;PF00320	PAS domain;PAS fold;GATA zinc finger	AFVVCDARSHDNPIIYCSDSFERLTGYNKYEIIGQNCRFLQSPDGKVESGVKRKYCDDDSVLYLKNSITTRTEAQISLINYRKGGQPFMNLLTMIPLLDGNGEALQFVGFQVDL;LYLSPACGKVLEYDPSELVGTALSSVCHPSDIVPVTRELKDTQSGSSVSVVFRIRRKQNGYVWFESHGCLHTDHGK;CANCHTISTPEWRRGPSGNRDLCNSCGLRWAKQ	325;530;875	438;605;907	1.5e-13;6.6e-08;1.7e-11	1	CANCHTISTPEWRRGPSGNRDLCNSC	Type IVb
85	EnsemblFungi	Ascomycota	Dothideomycetes	Microthyriales	Microthyrium microscopicum str. CBS 115976	Mmic3	KAF2668513	MNNTATPTATIGPGGSAPLCKNCGTTTTPLWRRDDNGTVLCNACGLFLKLHGKSRPISLKTNVIKSRNRVRTSTGAGGRKKQAAQDLVALSGQSSTDPQINAAVDAARRASASVHASIDVGQRSQSPISRHPTPGLQNGLPSNIAPQSMFDSVNVESQHQYFTPSIQAPSLRAPSPRSDHEADQTKSDAQSPYEALHKQATALHTRVRELDVINGLYRSRVQELENSLQDSRGKEQAAVEATNAVRTELDAAALREGELKRRLEELENELAESREGPRAKKLRLSDFVDDRSQTSTSTSTSA	302	32.5567	9.248	70.53	-0.721	0(N)	Nucleus	2	PF00320;PF25026	GATA zinc finger;Asd-4-like domain	CKNCGTTTTPLWRRDDNGTVLCNACGLFLKLHGK;PYEALHKQATALHTRVRELDVINGLYRSRVQELENSLQDSRGKEQAAVEATNAVRTELDAAALREGELKRRLEELENEL	20;192	53;270	1.2e-12;3.9e-18	1	CKNCGTTTTPLWRRDDNGTVLCNAC	Type IVa
86	EnsemblFungi	Ascomycota	Dothideomycetes	Microthyriales	Microthyrium microscopicum str. CBS 115976	Mmic4	KAF2668942	MADTDMVPAYDALPMSVQVPKGGLAASVYEQEGLPPPRSTQSSSRSPSSEPSSSLFSTAAVSASASASASAFAFGNIETAHSPAAASDTAPASPPPLPNPSLSQTGALNTKAALSPGQQRFHNTILNQTLFPALQNDATDLAAPRDLEANDPLALQVWKFYRNTKLLLPNANRLENLSWRIMFINQDRIAQENQRTNIQSSKKSFQVPKSAPSGIAQLRKASDHQVPTLSSSPLVQTSDDPMNLDDFLVPNSIASPAGLSPSPSGEKMLGSTSIPIRKTSSQDQDYQLSRTAPINAPIRPGTDFGYVQRHVRKTSIDERRPLKRPADASPQVPPVHGLMIPNDPASEAALHDYSLDRPQQILQPHATHPNQVPFSLDTFNIENDPIIHSAGPFQSQFSF…	923	98.1596	8.619	59.61	-0.606	0(N)	Nucleus	1	PF00320	GATA zinc finger	CTNCFTQTTPLWRRNPEGQPLCNACGLFLKLHGV	711	744	3.2e-13	1	CTNCFTQTTPLWRRNPEGQPLCNAC	Type IVa
87	EnsemblFungi	Ascomycota	Dothideomycetes	Microthyriales	Microthyrium microscopicum str. CBS 115976	Mmic5	KAF2670191	MVDTPVRQSAALPSISHLESAKSDRHDEQSHRNGTALASPSHFRFGTQSVFGQSGNSGLISPPVSRRTSSEEHISIPPARQSLPSIHEALGGREPVLSYPGPPPPPPPSALPTSSSSYFPHANPTASSEAVKREHSLPSFLPAGQSQHNAPPPPPPSSTRISTLSGPSPMFPSQQPKIPSLQPIRTGNSPPNASSRPNPSYPPPLQRPAYESPPQSAPANATFEYSGYQSQYPYPPSSSSSVAGQGYAGPQTVMSAPAQYPGWTADASGKRELKPLKSHDHSVKRKLDHFELEASLYELHSASQQVFNASDHYLKRAKQAKTTGEPSTNVVSMNDVDGLSREIGTIQRAFARLQEMVSASHAELLEQQREMQRQHPDMSPEHNGYNTDAGNGMGNPSDP…	468	50.3612	9.528	51.39	-0.859	0(N)	Nucleus	1	PF00320	GATA zinc finger	CHSCNRAETPEWRRGPDGARTLCNACGLHYAKL	414	446	1.7e-10	1	CHSCNRAETPEWRRGPDGARTLCNAC	Type IVb
88	EnsemblFungi	Ascomycota	Dothideomycetes	Microthyriales	Microthyrium microscopicum str. CBS 115976	Mmic6	KAF2672084	MTTSATYSPSEGKLPLRHAEPPQMSPMTQHSKEDLESAANLKMLSDAKRSSSSASAAASNPDSSAYPLSTSTATEQPHPYHTTTVTPSINTTSNLDTAVQPAPAPHSPASSASSHHNALQQIMAASPSLAQQPDPSPRLTNPSPRAPSAAGQTCTNCGTNRTPLWRRSPLGETICNACGLYQKARNQARPTNLKRGTTGANGDENSPTNNPSPGYTAPEITNSGSCPGDGRCNGTGGHAGCDGCPAYNNRMAKTQQAAAAAAQEASAVMQQPTSQMHYPVTPHGAGMPACQNCGTMITPLWRRDDEGHTICNACGLYFKLHGRHRPLDMKKGEIKRRKRVIPASHSPNPGALQQQLAHQEGLNGLSSPGSIPQSRTLPPPPVDFTNFRSSPTRFDASPS…	492	51.9719	8.814	51.02	-0.801	0(N)	Nucleus	2	PF00320;PF00320	GATA zinc finger;GATA zinc finger	CTNCGTNRTPLWRRSPLGETICNACGLYQKARN;CQNCGTMITPLWRRDDEGHTICNACGLYFKLHGR	154;290	186;323	2.9e-09;2.3e-11	2	CTNCGTNRTPLWRRSPLGETICNAC;CQNCGTMITPLWRRDDEGHTICNAC	Type IVa;Type IVa
89	EnsemblFungi	Ascomycota	Dothideomycetes	Mycosphaerellales	Baudoinia panamericana UAMH 10762	Bpan1	EMC91716	CSNCGTTKTPLWRRSPTGSIICNACGLYYKARNQMRPVGLKRVQQAQITNVVVACQNCGTTITPLWRRDEAGHTLCNACGLYQKLHGAHRPVQMKKPEIKRRKRI	105	11.8508	10.277	71.52	-0.555	0(N)	Nucleus	2	PF00320;PF00320	GATA zinc finger;GATA zinc finger	CSNCGTTKTPLWRRSPTGSIICNACGLYYKARNQ;CQNCGTTITPLWRRDEAGHTLCNACGLYQKLHG	1;55	34;87	5.7e-14;7.2e-13	2	CSNCGTTKTPLWRRSPTGSIICNAC;CQNCGTTITPLWRRDEAGHTLCNAC	Type IVa;Type IVa
90	EnsemblFungi	Ascomycota	Dothideomycetes	Mycosphaerellales	Baudoinia panamericana UAMH 10762	Bpan2	EMC94683	MRLSEALSDDSVDNSALGLDSGEAVVSNTTSSPRHVRLPPAHASDNSSGSSSAIQSLTSASSLSTLESKLDLSPTEASATRGLLRDSFFGEWKDDTAGLESESPEDMQKNDPLGTQIWKLYHKTKGQLPNSERLENLTWRMMSMNLRRKEMERKSLAARNQPNAPSGIAQLRQSSEQVNITSPDSDRMNLDDFIVPSSIASPATEQEPPTPAPAPAAASAATASAISIKQQQHRRLQAQELSLARASAPSLPPLEQSRANDEFAYVPRHVRKTSIDERRPHKRRAEASPQVPPVNSASMVSHDPADEAALHNYTLDPTPTLLPLQQPQAQHPPLPFNLSTFDLDNDPIINSAGPMQQHFTFSPVGSPSFTGSPFNQLYHQGTSMAPLQSISTFQSPQHS…	936	100.018	6.129	54.69	-0.688	0(N)	Nucleus	2	PF08550;PF00320	Nitrogen regulatory protein areA, GATA-like domain;GATA zinc finger	IWKLYHKTKGQLPNSERLENLTWRMMSM;CTNCFTQTTPLWRRNPEGHPLCNACGLFLKLHGV	117;677	144;710	1.9e-09;7.3e-13	1	CTNCFTQTTPLWRRNPEGHPLCNAC	Type IVa
91	EnsemblFungi	Ascomycota	Dothideomycetes	Mycosphaerellales	Baudoinia panamericana UAMH 10762	Bpan3	EMC95277	MDEQDNEQDDELERDRYANDQRLKSRFENIFAKYARDFSGIGDEIDMETGEIVVDNGHLANMQHEADPGDGESTQLLNDFRLTLEHEDEADGTDTSELTELEDSGSEDEAASSNTSISGGDSTGNPPKASQHSHNVPIDPALLQTSVLTSASDLTTAATRQDAAEGELVRDDAGHSVTQPQVMTSAVFNQHTTAVDVVSMPGVKESLLLLRRTSAAEVDPDRIHALGMSIANQIARFIGGGSESKSEPTSKSKRSEPAWDYPELPAFKRRNTERARPSLPQLTNLISSPVNTKKGEPKESVWAPLRHPRHSKRKPGIREKGFADAVANDVSRLPALASLEVTTGPAHNDEVGNLKKCTNCSIAATVAWRRGPDGPGSLCNCCGMYYYRYGLMKPLRPPT…	1382	150.679	5.03	71.16	-0.673	0(N)	Nucleus	2	PF10384;PF00320	Centromere protein Scm3;GATA zinc finger	LERDRYANDQRLKSRFENIFAKYARDFSGIGDEIDMETGEIVVDNGHLANMQH;CTNCSIAATVAWRRGPDGPGSLCNCCGMYYYRYGLM	12;357	64;392	1.5e-20;3.3e-06	1	CTNCSIAATVAWRRGPDGPGSLCNCC	Type IVb
92	EnsemblFungi	Ascomycota	Dothideomycetes	Mycosphaerellales	Baudoinia panamericana UAMH 10762	Bpan4	EMC96375	MNGVQYAPPATAGGNQQGPPVCQNCGTSTTPLWRRDESGSVLCNACGLFLKLHGRPRPISLKTDVIKSRNRVKSSQKKRDGEDGAVFQQPPPQQHAGGLAAAHPSVASAGGLHPLPHAIPPVGDAPVRLPSPGHLSRSGTPNLSQNPNIAPQHIFDTVTLGGEFVSPSLPAYRQPSPSQLSLNGASQLETALSYEGLAAQNGHLKTRVSELEVINGLFRGRVAELESTERGARQAEKVREEENDRLKAELDMARDRIAEMEKRIAQLEAYSPTRKRTRTSGDGSEGREISTSRSTFPIDDPLPGSSNFMIP	311	33.365	8.927	70.32	-0.637	0(N)	Nucleus	2	PF00320;PF25026	GATA zinc finger;Asd-4-like domain	CQNCGTSTTPLWRRDESGSVLCNACGLFLKLHGR;SYEGLAAQNGHLKTRVSELEVINGLFRGRVAELESTERGARQAEKVREEENDRLKAELDMARDRIAEMEKRIAQLEA	22;193	55;269	1.1e-12;1.5e-23	1	CQNCGTSTTPLWRRDESGSVLCNAC	Type IVa
93	EnsemblFungi	Ascomycota	Dothideomycetes	Mycosphaerellales	Baudoinia panamericana UAMH 10762	Bpan5	EMC98810	MDLDLDLSQGGDGSFMMGGGGGSSGDGDGGGGGEVVTSSAPPPESNNTYGEKMTGVGAGPLPTGFGMPAPQGTSTLTEFTKRRNWSQRIIEELKDFLHILTPDGRILYVSPSCKTITGYESHTLVGKFIGEYVHPDDSGIFMREFNESIASGNSLRFFYRFKKDDGTYMIFECDGHPHISPDPPSVPQGYNASSTQGNQPGGMCRGFFMMARPYPTKNAALLDSFLEHKIENERLMKRVEELKREEHEENAEQDRLYREVSASQTGGTPTESQGLSRETGTSETPGPLSEPNYQGMPPPAKPSISNTALTRQNLDSALSAQKPDSIADKMSRYEASSTHLESIELLTGLRYRDGERSHGISTGDTSPALIRGDAGIAILLDRDRDGGRKSEKKKLKVAD…	471	50.6477	5.554	54.31	-0.767	0(N)	Nucleus	2	PF08447;PF00320	PAS fold;GATA zinc finger	ILYVSPSCKTITGYESHTLVGKFIGEYVHPDDSGIFMREFNESIASGNSLRFFYRFKKDDGTYMIFECDGHPH;CADCGTLDSPEWRKGPKGPKTLCNACGLRWAKKEKK	106;403	178;438	5.3e-10;2.4e-11	1	CADCGTLDSPEWRKGPKGPKTLCNAC	Type IVb
94	EnsemblFungi	Ascomycota	Dothideomycetes	Mycosphaerellales	Baudoinia panamericana UAMH 10762	Bpan6	EMC98855	MLTKGRPQLPALSYLDVDKVKREEEAYQNRNLNPPQSLPPATSANPTFPYPSGPPPPYSQPAPTHASLAHAWSGVQSGVHTPPESRRTSGDEYDAKQITRQSLPSISEALGVDNQTSYSASMPTGPQTVAAHQSHPQPATPASPLSATKKYSMDPPPPPSQAHTNQASQHSYPHFRPDPSPHGFIPQEATSQRSAALERPPLHLQTSQPVSQPPQPAAYSYPPHPPSGYERSVSHPAEPMAPPPSGFSYGYTPYPPRYAQPTPPASVASGPIYQPSANYPAPETPPASWKAGSLVRQGPNERGTGPGDYSASVKRHLDLYDLEGALNAIASSSDILLDFSRRYGDRLHQTARSGTPMAYFPGMVEVDDMIAKSRLQVESLLKIRDVILAQQAEYDQQLS…	1171	130.405	6.199	68.94	-0.632	0(N)	Cytoplasm|Nucleus	2	PF00320;PF03074	GATA zinc finger;Glutamate-cysteine ligase	CHSCNRAETPEWRRGPDGARTLCNACGLHYAKL;IYMDAMAFGMGSCCLQITFQAKNIDEGRKMYDQLSPLGPVLLALTAATPIYKGFLADTDVRWNQISRAVDDRTPEELGEKPLKNDRWRIPKSRYASNSTYISQDPRLRPEYLDPDLVIDEKLKDRLVEGGMDDLLATHFAHLFIRDPIVVFSEDLKELDLDKADHFENLQSTNWQHMRFKPPPPGSEIGWRVEVRPMEIQITDFENAAFSVFVVLITRALLSFDLNFYIPITRTTQNMETAHRRDAVLNDMFYFRKDPLPKRPSKTNGASNPPSGSSTPRMHPIIPPDSPVGSVEDEYELMTVDEIINGRADGTFPGLIPLVESYLDSVNVDVETRCELAQYLALIRGRANGSLWTAAKWIRYFV…	446;759	478;1149	5.1e-10;3.6e-170	1	CHSCNRAETPEWRRGPDGARTLCNAC	Type IVb
95	EnsemblFungi	Ascomycota	Dothideomycetes	Mycosphaerellales	Baudoinia panamericana UAMH 10762	Bpan7	EMD00120	MVGGQSLDDIVNQNAKAMRRQSMPQQYGANMTQNHMDGDMRRISMMDYSGASPAAPMNNYGYDQNGMDQSGMAASTSPAHPSQGHPRRSQSRRESGTDLAVNTSFAGTAPNYNAMIHPHSAYASPAHHQQQQHGLDLGMSSPYIDTGMSMSMDYGVQSNQGAMGADAMDLNMYNQPQFNNSVMSSPMHQMAQQSTNSTPRAQNQEAGGGSNMRPQYGNRSTHSGSSTARNPSRSHSLHMSDLSSTANNGTPTNQPASNNQAQQQSNSSGGFTGQPQNPVPGSRQDRPVPGQNTQKYDGLNGPLPVDPSNYNPNNQGFAWEAPEGGWPSTMIGRPHMQSSYKNAYSSTGFDMLGVLMRVATRPNAEINIGAVDLSCAFVVCDAELDDFPIVYCSDNFERL…	1054	114.917	8.937	59.17	-0.681	0(N)	Nucleus	3	PF13426;PF08447;PF00320	PAS domain;PAS fold;GATA zinc finger	LDDFPIVYCSDNFERLTGYTKHMILGRNCRFLQSPDGNVAPGIRRKYVDDDSVLYLKNMINLRREAQISLINYRRGGQPFMNLLTMIPITWDTEQVKFFVGFQVDL;VSPSALRVLEYEPSEIIGTALSSVCHPSDIVPVTRELKDTSTGASVNVVFRIRRKNSGYMWFEGHGSLHTEQGK;CANCHTKVTPEWRRGPSGQRDLCNSCGLRWAK	384;583;926	489;656;957	2.7e-13;7e-07;2.7e-10	1	CANCHTKVTPEWRRGPSGQRDLCNSC	Type IVb
96	EnsemblFungi	Ascomycota	Dothideomycetes	Mycosphaerellales	Cercospora berteroae	Cber1	PPJ49549	MSFRPSSPRTVSAANHASSDSSAICSLTSTSTLDTLPTRLDLSPTEREARKGLLRETFFDQFKDDYPASAASAALSRTDADAETPEEMQKNDPLGTQIWKLYHKTKGQLPNSERLENLSWRMMSMNLKRKELERQGLASRPPAPALNAPSGIAQLRKTSEHIGQATQQQAPSDDHMNLDEFLEPSSIGSPAGISPSPTPEHSATVSASAIPIRQQQRLQSDELSVARASAPSVPPLEQNRTHLEFSYVQRHVRKTSIDERRPPKRRAEASPQVPPVQNSTLAAQDPVAEAALHNYTLDTQPHAPHNTLPFNLDTFNIDNDTILNSAGPLQQQFSFSPVGSPMMTTGGFSHMYHQNMSHPQSVSGFQSPPTSAYPSTASTPQPIPEGEQIFFGNQLHSGS…	897	96.2833	7.244	54.78	-0.751	0(N)	Nucleus	2	PF08550;PF00320	Nitrogen regulatory protein areA, GATA-like domain;GATA zinc finger	IWKLYHKTKGQLPNSERLENLSWRMMSM;CTNCFTQTTPLWRRNPEGHPLCNACGLFLKLHGV	98;652	125;685	7.5e-10;6.9e-13	1	CTNCFTQTTPLWRRNPEGHPLCNAC	Type IVa
97	EnsemblFungi	Ascomycota	Dothideomycetes	Mycosphaerellales	Cercospora berteroae	Cber2	PPJ49912	MYPGQHQQGHAEMAGSGAVDMGMMTADASGLNGLDIDMSLPMDLDLDLSGNGDQSFNPIGVSTAAALETNSIITSNGAGGYTPQGQHQQQDSNMSGAGAGPLPTGFGMPPQSNQSTLTEFTKRRNWSQRIIEELKDFLHILTPDGRILYVSPSCKTITGYEPHSLIGKFIGEYVHPDDSGIFMREFNESIASGNALRFFYRFKKDDGTYMIFECDGHPHISPEPAGAATFGQTPNGQTLPVAGLCRGFFMMARPYPTKNAALLDSFLEHKIENERLMRRIMELKEEEKEETAEQERMFREQTSQAGGTPSHSGMGASREPESGASEVPANATPNYQGMPPPAKPPISNTALTRQNLDSALSSQKPDSIADKMSRYEANNTHLESIELLTGLRYRDGERS…	526	56.8732	5.671	57.6	-0.656	0(N)	Nucleus	2	PF08447;PF00320	PAS fold;GATA zinc finger	ILYVSPSCKTITGYEPHSLIGKFIGEYVHPDDSGIFMREFNESIASGNALRFFYRFKKDDGTYMIFECDGHPH;CADCGTLDSPEWRKGPKGPKTLCNACGLRWAKKEKK	147;444	219;479	8e-11;2.7e-11	1	CADCGTLDSPEWRKGPKGPKTLCNAC	Type IVb
98	EnsemblFungi	Ascomycota	Dothideomycetes	Mycosphaerellales	Cercospora berteroae	Cber3	PPJ55651	MSQSAPATAGYGNQNGSGPPICANCQTSTTPLWRRDESGSVLCNACGLFLKLHGRPRPISLKTDVIKSRNRVKASQAKKRDSHGGENGLQHMSNGYPAAHPDIAHLQHTVQTGHQHGLPMGSGIVGHAHNQQARPGSPNSMARSQTPGLHQQHSNPNIAPQHIFDTVSLPSDTFASPSLPHLAPQQNGQQNGQLEQPSNVQDLLSQNVTLRTRVSELEVINDLFRGRVTELEQSENQTKERERAHEEEAQRLTAKLATAHARAAELQRKLDELQQTQAETEDGPARKKTKMESGNGIDESGPQEESAQAGAQ	312	33.8129	6.977	62.02	-0.924	0(N)	Nucleus	2	PF00320;PF25026	GATA zinc finger;Asd-4-like domain	CANCQTSTTPLWRRDESGSVLCNACGLFLKLHGR;QDLLSQNVTLRTRVSELEVINDLFRGRVTELEQSENQTKERERAHEEEAQRLTAKLATAHARAAELQRKLDELQQT	22;201	55;276	1.9e-12;6.000000000000001e-22	1	CANCQTSTTPLWRRDESGSVLCNAC	Type IVa
99	EnsemblFungi	Ascomycota	Dothideomycetes	Mycosphaerellales	Cercospora berteroae	Cber4	PPJ57703	MNGYGSFNGAFDGSNLEQHDDGMQMIGQDGLGGMGGQSLDDIVNQNAKMIRRQSMPVGQNYGSSPHHLNPDMRRISMMDYGSGSPAGSMNSFQYDASPGMDQSGFASGGVTPVTVGQQPRRTHSSRRPSNGDLSLDTASFQNNHQNYTSMVTPGSAMATSPAHPSAPMDMGGMQTSPYIDTGMGMNMEDYGVDANGLSSSMSQDPMQMNLYNQPQFNTSAFSSPMHHTQQSQPGGVTPQSGRIPSHDPGGGNGQHSQYGPHSSTQPSTVRQMSRTQNLQVPDHLASPAHGASPHSATPISGHTSSHASRPPIHSQTSHASPHSNGPHVGTGFPGQPQHPVPGSQDDRGMNRHRAQYDGMNGPVPVKSQNINPNNQNFPWDMPEGGWPSTMSGKPHTQSV…	1110	120.721	8.577	59.1	-0.693	0(N)	Nucleus	3	PF13426;PF08447;PF00320	PAS domain;PAS fold;GATA zinc finger	FVVCDAEKDDFPIVYCSENFERLTGYTKHMILGRNCRFLQSPDGNVAPGIRRKYVDDDSVLYLKNMINLRREAQISLINYRRGGQPFMNLLTMIPITWDTDQVKFFVGFQVDL;ISPSALRVLEYEASEIIGTALSSVCHPSDIVPVTRELKDTSSGASVNVVFRIRRKNSGYMWFEGHGSLHTEQGK;CANCHTRVTPEWRRGPSGQRDLCNSCGLRWAK	437;643;986	549;716;1017	1.9e-13;5.3e-06;1.4e-10	1	CANCHTRVTPEWRRGPSGQRDLCNSC	Type IVb
100	EnsemblFungi	Ascomycota	Dothideomycetes	Mycosphaerellales	Cercospora berteroae	Cber5	PPJ60018	MDASRRPQLPALSYLEADKVKREDDAYQQRSNGTPQSLSASAGASPTYHYPPGPPPPYSHANAAPPTNTWPHSVQTPPESRRTSENDKESIKPRQSLPSISEALGNVDNPSSFASTPAPPAPLQSSHLAQSHAPTPHSPSPRTSHPMEPPQALSSATFPSSNNYQSQHRPEPPRQSSYPPAESGRPASTVYTSTAESKPIYLQNSHEPARQPSQAATLSRAEERSPPDEPSYPARSSNSMGPPSSFPYGYAPYPPRYAESGASTSNSTGPIYQPSTTYGPPRPLQSGMKTGNSRFEDRGLAHHSNTVKRHLDFFDLEASLNEIASTSGILSDFSRRYGDRMHHTQRSGASLNTLPGLVEVDDMINKSRVAHDCLIKIRDVVLQQQALFEQRAADQRQQH…	500	54.522	9.197	45.02	-1.076	0(N)	Nucleus	1	PF00320	GATA zinc finger	CHSCNRAETPEWRRGPDGARTLCNACGLHYAKL	443	475	1.9e-10	1	CHSCNRAETPEWRRGPDGARTLCNAC	Type IVb
101	EnsemblFungi	Ascomycota	Dothideomycetes	Mycosphaerellales	Cercospora beticola	Cbet1	PIA88814	MMANVSTSSAPPNRTKGLSPRMANLLTQPSQQELEAARQLVEHSQSTTTTTQAPVQEPQLSHAPSNQSQTSTAFPHGYREANEYAQPTQSSPAMSLASAPIMQPSRTSPSAMSNIGTPGGQMCSNCGTTKTPLWRRSPAGAVICNACGLYYKARNQMRPVGLKRGATSANQNPEIPTNDRGTSPSSVQGGATYVSADQSMHGTCPGGGRCNGTGGQDACAGCPAYNNRVSKTAQVALRQASAERGETSSAPTGSAHMHTVVQNYVSPSQHSQTNVVVACQNCGTTITPLWRRDEQGHTICNACGLYHKLHGAHRPVQMKKAEIKRRKRVVPAVSGQQHMQHPGSPFPADNMSEGSAPSERGGPSSLLNTPLQQPESSPFVHAVSHGPAPIPVDFTDAFK…	488	51.8812	9.13	53.32	-0.728	0(N)	Nucleus	2	PF00320;PF00320	GATA zinc finger;GATA zinc finger	CSNCGTTKTPLWRRSPAGAVICNACGLYYKARNQ;CQNCGTTITPLWRRDEQGHTICNACGLYHKLHG	123;279	156;311	1e-12;2.5e-11	2	CSNCGTTKTPLWRRSPAGAVICNAC;CQNCGTTITPLWRRDEQGHTICNAC	Type IVa;Type IVa
102	EnsemblFungi	Ascomycota	Dothideomycetes	Mycosphaerellales	Cercospora beticola	Cbet2	PIA89493	MYPGQHQQGHAEMAGSGAVDMGMMTADASGLNGLDIDMSLPMDLDLDLSGNGDQSFNPIGVSTAPAPETNSIIASNGAGGYTPQGQHQQQDSNMSGAGAGPLPTGFGMPPQSNQSTLTEFTKRRNWSQRIIEELKDFLHILTPDGRILYVSPSCKTITGYEPHSLIGKFIGEYVHPDDSGIFMREFNESIASGNALRFFYRFKKDDGTYMIFECDGHPHISPEPAGAATFGQTPNGQTLPVAGLCRGFFMMARPYPTKNAALLDSFLEHKIENERLMRRIMELKEEEKEETAEQERMFREQTSQAGATPSHSGMGASREPESGASEVPANATPNYQGMPPPAKPPISNTALTRQNLDSALSSQKPDSIADKMSRYEANNTHLESIELLTGLRYRDGERS…	526	56.8532	5.674	56.69	-0.668	0(N)	Nucleus	2	PF08447;PF00320	PAS fold;GATA zinc finger	ILYVSPSCKTITGYEPHSLIGKFIGEYVHPDDSGIFMREFNESIASGNALRFFYRFKKDDGTYMIFECDGHPH;CADCGTLDSPEWRKGPKGPKTLCNACGLRWAKKEKK	147;444	219;479	8e-11;2.7e-11	1	CADCGTLDSPEWRKGPKGPKTLCNAC	Type IVb
103	EnsemblFungi	Ascomycota	Dothideomycetes	Mycosphaerellales	Cercospora beticola	Cbet3	PIA97238	MNGYGSFNPAFDGSNMDQHDDGLQIMGQDGIGGMGGQSLDDIVNQNAKMIRRQSMPVGQNYGTSPHHLNPDMRRISMMDYGSGSPAGSMNSFQYDHSSAMDQNGFASGGVTPVAVGQQPRRTPSGRRPSNGDLSLDTTGFQNNQQNYTSMITPGSAMATSPAHPSTAMDMGGMQTSPYIDTSMGMNMEDYGVDTSGLSSAMSQDPMQLNLYNQPSFSTSAFSSPMHHTQQPQHGGVTPQSGRMSSHDPGGGSGQHSQYGPQNSSQPSTVRQMPRTQSLQVPGHLASPSHGASPHSATPISGPASSHASRPPIHSQNSHASPHSSGHHAGEGFPGQPQHPVPGSHDDRGMNRHRAQYDGINGPVPVKAQNINPNNPNFPWDMPEGGWPSTMTGKPHTQSV…	1107	120.185	8.668	58.4	-0.691	0(N)	Nucleus	3	PF13426;PF08447;PF00320	PAS domain;PAS fold;GATA zinc finger	FVVCDAEKDDFPIVYCSENFERLTGYTKHMILGRNCRFLQSPDGNVAPGIRRKYVDDDSVLYLKNMINLRREAQISLINYRRGGQPFMNLLTMIPITWDTDQVKFFVGFQVDL;ISPSALRVLEYEASEIIGTALSSVCHPSDIVPVTRELKDTSTGASVNVVFRIRRKNSGYMWFEGHGSLHTEQGK;CANCHTRVTPEWRRGPSGQRDLCNSCGLRWAK	437;643;985	549;716;1016	1.9e-13;4.1e-06;3.3e-10	1	CANCHTRVTPEWRRGPSGQRDLCNSC	Type IVb
104	EnsemblFungi	Ascomycota	Dothideomycetes	Mycosphaerellales	Cercospora beticola	Cbet4	PIB00106	MLQYAVPNASQPFHRPPAVFAEAPRPPSGIAHREHHSTGASIPRPPSTASTHSSSHPRQASFSGRIGTDNISLATLASLAANAPAAVVSHSGDSTRSNTPVSTVAMSQSAPATAGYGNQNGSGPPICANCQTSTTPLWRRDESGSVLCNACGLFLKLHGRPRPISLKTDVIKSRNRVKASQAKKRDSHGGENGLQHMSNGYPAAHPDLAHLQHAVQTGHQHGLPMGSGIVGHAHDQQARPGSPNSMARSQTPGLHQQHSNPNIAPQHIFDTVSLPSDTFASPSLPHLALQQNGQQNGQLEQPSNVQDLLSQNVTLRTRVSELEVINDLFRGRVTELEQSENQTKERERAHEEEAQRLTAELATAHARAAELQRQLDELQQTQAETADGPARKKTKMESE…	417	44.5374	6.915	63.07	-0.762	0(N)	Nucleus	2	PF00320;PF25026	GATA zinc finger;Asd-4-like domain	CANCQTSTTPLWRRDESGSVLCNACGLFLKLHGR;QDLLSQNVTLRTRVSELEVINDLFRGRVTELEQSENQTKERERAHEEEAQRLTAELATAHARAAELQRQLDELQQT	127;306	160;381	2.8e-12;1.4e-21	1	CANCQTSTTPLWRRDESGSVLCNAC	Type IVa
105	EnsemblFungi	Ascomycota	Dothideomycetes	Mycosphaerellales	Cercospora beticola	Cbet5	PIB01199	MDASRRPQLPALSYLEGDKVKREDDAYQQRSNGTPQSLSASAGASPTYHYPPGPPPPYSHANAAPPTNTWPQSVQTPPESRRTSENEKESIKPRQSLPSISEALGNVDNPSSFASTPAPPAPLQSSHLVQSHAPTPQSPSSRRSYPMEPPQALSSATFPSSNNYQSQHRPEPPRQSSYPPAEPGRPASTIYTSTAESKPIYLQNSHEPTRQPSQPATLSRAEERSPTHEPSYPARSSNSMGPPSSFPYGYAPYPPRYAESGASTSNSSGPIYQPSTTYGPPRPLQSGLKTGSSRFEDRGLAHHSNTVKRHLDFFDLEASLNEIASTSGILSDFSRRYGDRMHHTQRSGASLNTLPGLVEVDDMINKSRVAHDCLIKIRDVVLQQQALFEQQAADQRQQH…	500	54.6092	9.262	45.78	-1.073	0(N)	Nucleus	1	PF00320	GATA zinc finger	CHSCNRAETPEWRRGPDGARTLCNACGLHYAKL	443	475	1.9e-10	1	CHSCNRAETPEWRRGPDGARTLCNAC	Type IVb
106	EnsemblFungi	Ascomycota	Dothideomycetes	Mycosphaerellales	Cercospora beticola	Cbet6	PIB02559	MSFRPSSPRTVSAANHASSDSSAICSLTSTSTLDTLPTRLDLSPTEREARKGLLRETFFDQFKDDYPASAATAALSRTDTDAETPEEMQKNDPLGTQIWKLYHKTKGQLPNSERLENLSWRMMSMNLKRKELERQGLASRPLAPAQNAPSGIAQLRKSSEQIGQVAQQQAPSEDHMNLDDFLEPSSIGSPAGISPSPTPEHSATVSASAIPIRQQQRLQSDELSIARASAPSVPPLEQNRTHREFSYVQRHVRKTSIDERRPPKRRAEASPQVPPVQNSTLAAQDPVAEAALHNYTLDTQPHAPHNALPFNLDTFNIDNDTILNSAGPLQQQFSFSPVGSPMMTTGGFSHMYHHNMSHPQSVSGFQSPPTSAYPSTVSTPQPIPEGEQIFFGNQLHSGS…	897	96.2825	7.843	55.12	-0.737	0(N)	Nucleus	2	PF08550;PF00320	Nitrogen regulatory protein areA, GATA-like domain;GATA zinc finger	IWKLYHKTKGQLPNSERLENLSWRMMSM;CTNCFTQTTPLWRRNPEGHPLCNACGLFLKLHGV	98;652	125;685	7.5e-10;6.9e-13	1	CTNCFTQTTPLWRRNPEGHPLCNAC	Type IVa
107	EnsemblFungi	Ascomycota	Dothideomycetes	Mycosphaerellales	Cercospora zeae-maydis SCOH1-5	Czea1	KAF2207616	MLQYAVPTVSQPFHKSPAVFAEPPRPPSSISHREHHSSGSSIPRPPSTASTDSSSQARQPSLSGRTGSDNISLATLASLAANAPAAVVSHSGDSTRSNTPVSTVAMSQSAPATAGYGNQNGSGPPICANCQTSTTPLWRRDESGSVLCNACGLFLKLHGRPRPISLKTDVIKSRNRVKASQAKKRDSHGGENGVQHVSNGYSAAHPDIAHLQHSVPTGHQHGLPMGGGIAGHGHDQQARSGSPNSIARSQTPGLHQQHSNPNIAPQHIFDTVSLPSDTFASPSLPHLALQQNGQQNSQLEQPSTVQDLLSQNVTLRTRVNELEVINDLFRGRVSELEQNETTQRLTAELATAVARAAELQRRLDEVHRTQVEAEDGPARKKTKTESGNGNGAEEVASME…	407	43.0197	7.876	66	-0.673	0(N)	Nucleus	2	PF00320;PF25026	GATA zinc finger;Asd-4-like domain	CANCQTSTTPLWRRDESGSVLCNACGLFLKLHGR;TVQDLLSQNVTLRTRVNELEVINDLFRGRVSELEQNETTQRLTAELATAVARAAELQRRLDEVHRTQVE	127;304	160;372	2.7e-12;4.9e-16	1	CANCQTSTTPLWRRDESGSVLCNAC	Type IVa
108	EnsemblFungi	Ascomycota	Dothideomycetes	Mycosphaerellales	Cercospora zeae-maydis SCOH1-5	Czea2	KAF2207903	MLTTLAPSPQLPALSYLEGDKVKREDDAYQQRTTGTPQSLSASAGASPTYHYPPGPPPPYSHAHAAPPTNTWAASVQTPPESRRTSENEKESTKPRQSLPSISEALGNVDNPPSFASTPAPPAALQSSHPPQSHAPTPHSPSSRRSYPMEPPPALSSASFPSSNPYHAPHRPDPARQSSYPPAESARPASTAYASPAESKPIYLQNPHDAARQPSQPTPIARAEERSPPHEPSYPARSSSSMGPPSSFPYGYAPFPPRYADSAASTSNSSGPIYQPSTTYGPPRPLPNGLKGASSRFEDRGLAHHSSTVKRHLDFFDLEASLNEIASTSGILSDFSRRYGDRMHHTQRSGASLNTLPGLVEVDDMINKSRVAHDCLIKIRDVILQQQALFEQQAADQRQ…	502	54.1139	9.198	47.81	-0.94	0(N)	Nucleus	1	PF00320	GATA zinc finger	CHSCNRAETPEWRRGPDGARTLCNACGLHYAKL	445	477	1.9e-10	1	CHSCNRAETPEWRRGPDGARTLCNAC	Type IVb
109	EnsemblFungi	Ascomycota	Dothideomycetes	Mycosphaerellales	Cercospora zeae-maydis SCOH1-5	Czea3	KAF2210781	MSLHVRFPDSSDSNAANDASGTSSSMASLTSTSTLDTLPTRLDLDESEARKGLLRESFFHFKDDYPASASATTASRADADAETPEEMQKNDPLGTQIWKLYHKTKGQLPNSERLENLSWRMMSMNLKRKELERQGLAARPLNPAQNAPSGIAQLRKSSEHSGPAAQQQAAADDQMNLDEFLEPSSIGSPAGISPSPAPEHSATVSASAIPIKQQQRLQNHELSVGRASAPSVPPLEQSRTHREFFYVQRHVRKTSIDERRPPKRRAEASPQVPPVQNSTLVAQDPMAEAALHNYTLDAQPQAPHDALPFNLETFNIDNDPILNSAGPLQQHFSFSPVGSPMMTTGGFSHMFTHNMSQPQGVHGFQSPPTSAYPSTVSTPQPIPEGEQIFFGNQLHSGSV…	898	96.2034	6.997	54.31	-0.718	0(N)	Nucleus	2	PF08550;PF00320	Nitrogen regulatory protein areA, GATA-like domain;GATA zinc finger	IWKLYHKTKGQLPNSERLENLSWRMMSM;CTNCFTQTTPLWRRNPEGHPLCNACGLFLKLHGV	97;653	124;686	7.5e-10;7e-13	1	CTNCFTQTTPLWRRNPEGHPLCNAC	Type IVa
110	EnsemblFungi	Ascomycota	Dothideomycetes	Mycosphaerellales	Cercospora zeae-maydis SCOH1-5	Czea4	KAF2214354	MNAYGSFHGAFDGSTMDHHDDAMQMMGQDGMGGMGGQSLDDIVNQNAKMIRRQSMPVGQNYGSSPHHLNPDMRRISMMDYGSGSPAGSMSSFQYDPSSAMDHSGFASGGVTPTAVSQPPQRTHSGRRPSHGDLSLDTTNFQNNQQNYTSMVAPTSAMATSPAHPSTSMDIGGMQASPYIDANMGMNMEDYGVDASGLSSTMTQDPMQMNLYNQSQFSTSAFNSPLHPTQQQQPGGVTPQSGRLSSHDPGGGSGQHSQYGPQNSSQPSTVRQLSRTQSLQVPDHLSSPAHGASPHSATPGSGHTSSHGSRPPLHSHTTSHASPHSNAPPAGGFPGQPQHPVPGSHDDRGMNRHRAQYDGINGPVPVKAQNHNPNNQNFPWEMPEGGWPSTMSGKPHMQSV…	1103	120.22	8.352	55.69	-0.743	0(N)	Nucleus	3	PF13426;PF08447;PF00320	PAS domain;PAS fold;GATA zinc finger	FVVCDAEKDDFPIVYCSENFERLTGYTKHMILGRNCRFLQSPDGNVAPGIRRKYVDDDSVLYLKNMINLRREAQISLINYRRGGQPFMNLLTMIPISWDSDQVKFFVGFQVDL;ISPSAMRVLEYEPSEIIGTALSSVCHPSDIVPVTRELKDTSSGASVNVVFRIRRKNSGYMWFEGHGSLHTEQGK;CANCHTRVTPEWRRGPSGQRDLCNSCGLRWAK	437;643;971	549;716;1002	1.5e-13;3.7e-06;1.3e-10	1	CANCHTRVTPEWRRGPSGQRDLCNSC	Type IVb
111	EnsemblFungi	Ascomycota	Dothideomycetes	Mycosphaerellales	Cercospora zeae-maydis SCOH1-5	Czea5	KAF2215614	MDLDLDLSGNGDHNGAGGYTPQGQHQQQEGNMSGAGAGPLPTGFGMAPPSNQSTLTEFTKRRNWSQRIIEELKDFLHILTPDGRILYVSPSCKTITGYEPHSLIGKFIGEYVHPDDSGIFMREFNESIASGNALRFFYRFKKEDGTYMIFECDGHPHISPEPGGAATFGQTPNGQTLPVAGLCRGFFMMARPYPTKNAALLDSFLEHKIENERLMRRIMELKEEEKEENAEQERMFREQTSPPGATPSHSGVGAPREVESGTSEVTAPTMPNYQGMPPPAKPPSSNIALTRQNLDSALSSQKPDSIADKMSRYEANSTHLEGIELLTGLRYRDGERSHGISTGDTSPALIRGDAGIAILLDRDRDGAKKEKKKTKVADEYVCADCGTLDSPEWRKGPKG…	464	50.5142	6.189	57.07	-0.728	0(N)	Nucleus	2	PF08447;PF00320	PAS fold;GATA zinc finger	ILYVSPSCKTITGYEPHSLIGKFIGEYVHPDDSGIFMREFNESIASGNALRFFYRFKKEDGTYMIFECDGHPH;CADCGTLDSPEWRKGPKGPKTLCNACGLRWAKKEKK	85;382	157;417	3.9e-11;2.3e-11	1	CADCGTLDSPEWRKGPKGPKTLCNAC	Type IVb
112	EnsemblFungi	Ascomycota	Dothideomycetes	Mycosphaerellales	Cercospora zeae-maydis SCOH1-5	Czea6	KAF2217298	MSPRMANLLAREPSQQELEAARQLVEHSQSITTTQAPVQESQLSHASSTQPQPSPSFRHAYREANEYTQPTQSSPAIPLASAPIMQPSRTSPSAMSNVGTPGGQMCSNCGTTKTPLWRRSPAGAVICNACGLYYKARNQMRPVGLKRGSTSVNQNPEGPATDRGTSPSSVQGGATYVSADQSVHGTCPGGGRCNGTGGQDACAGCPAYNNRASKTAQVALRQASAERGEASSAPTGSAHMHTVVQNYVSPSQQSQTNVVVACQNCGTTITPLWRRDEQGHTICNACGLYHKLHGSHRPVQMKKAEIKRRKRVVPAAQGQQHLLPGSPYPTD	331	35.1098	9.46	53.14	-0.68	0(N)	Nucleus	2	PF00320;PF00320	GATA zinc finger;GATA zinc finger	CSNCGTTKTPLWRRSPAGAVICNACGLYYKARNQ;CQNCGTTITPLWRRDEQGHTICNACGLYHKLHGS	106;262	139;295	6.1e-13;1.1e-11	2	CSNCGTTKTPLWRRSPAGAVICNAC;CQNCGTTITPLWRRDEQGHTICNAC	Type IVa;Type IVa
113	EnsemblFungi	Ascomycota	Dothideomycetes	Mycosphaerellales	Cercospora zeina str. CMW25467	Czei1	PKR99107	MDASRRPQLPALSYLEADKVKREDDAYQQRSTGTPQSLSASAGASPTYHYPPGPPPPYSHAHAAPPTNTSWPPAVQTPPESRRTSENEKEPTRPRQSLPSISEALGSVDNPASFASTPAPPAALQSSHLPQSHPPTPHSPSSRRSYPMEPPPALSSAPFPSSNHYPSQQHRPEPSRQSSYPPAESARPASTAYASTAEPKPIYLQNSHEPARQPSQPAPIARAEERSPPHEPAYPARSSSAMGPPSSFPYGYAPFPPRYADSAAPTSNSSGPTYQPATTYGPPRPLPNGLKGANPRFEDRGLAHHSNTVKRHLDFFDLEASLNEIASTSGILSDFSRRYGDRMHHTQRSGASLNTLPGLVEVDDMINKSRVAHDCLIKIRDVVLQQQALFEQQAADQRQ…	502	54.5243	9.284	45.28	-1.03	0(N)	Nucleus	1	PF00320	GATA zinc finger	CHSCNRAETPEWRRGPDGARTLCNACGLHYAKL	445	477	1.9e-10	1	CHSCNRAETPEWRRGPDGARTLCNAC	Type IVb
114	EnsemblFungi	Ascomycota	Dothideomycetes	Mycosphaerellales	Cercospora zeina str. CMW25467	Czei2	PKS00402	MSLRPRPQERPSSPHVHVRFSDSSDRNAANHASGTSSSMASLTSTSTLDTLPTRLDLDETEARKGLLRESFFHFKDDYPASARATAASRTDADTETPEEMQKNDPLGTQIWKLYHKTKGQLPNSERLENLSWRMMSMNLKRKELERQGLAARPLAPTQNAPSGIAQLRKSSEHGGQAAQQQAAAAEDQMNLDEFLEPSSIGSPAGIPPSPAPEHSATVSASAIPIKQQQRLQGDELSAVRASAPSVPPLEQSRTHREFSYVQRHVRKTSIDERRVKVNPAYFRALANGPHKPPKRRAETSPQVPPVQNSALAARDPMAEAALHNYTLDPQLHAPYNALPFNLETFNIDNDPILNSAGPLQQQFSFSPVGSPMMTTGGFSHMYNHNMSQPQSVHGFQSPP…	927	99.5344	9.008	55.56	-0.723	0(N)	Nucleus	2	PF08550;PF00320	Nitrogen regulatory protein areA, GATA-like domain;GATA zinc finger	IWKLYHKTKGQLPNSERLENLSWRMMSM;CTNCFTQTTPLWRRNPEGHPLCNACGLFLKLHGV	110;682	137;715	7.8e-10;7.2e-13	1	CTNCFTQTTPLWRRNPEGHPLCNAC	Type IVa
115	EnsemblFungi	Ascomycota	Dothideomycetes	Mycosphaerellales	Cercospora zeina str. CMW25467	Czei3	PKS02176	MNAYGSFHGAFDGSTLDQHDDAMQMMAQDGMGGMGGQSLDDIVNQNAKMIRRQSMPVGQNYGSSPHHLNPDMRRISMLDYGSGSPEASNMGSFQYDPSPAMDQSGFASGGVTPAAGSQQPRRTHSSRRPSHGDLQLDTTGFQSHQQNYTSMVAPSSAMATSPAHPSTTMDMGGMQTSAYIDTNMGMNMEDYGVDASGLGSAMSQDPMQMNMYSHSQFSTPAFNSPLHPTQQQQPGGMTPQSGRLPSHDPGGGSGQHSQYGPPNNSQCATVRQLSRTQSLQVPDHLSSPGHGASPHNATPMSGHASSHASRPPLHSHATSHASPHSNAPPGGGFTGQPQHPVPGSHDDRGMNRHRAQYDGINGPVPVEVQKHNPNNQNFPWEVPDGGWPSTMSGKPHMQS…	1113	120.884	8.325	57.3	-0.696	0(N)	Nucleus	3	PF13426;PF08447;PF00320	PAS domain;PAS fold;GATA zinc finger	FVVCDAEKDDFPIVYCSENFERLTGYTKHMILGRNCRFLQSPDGNVAPGIRRKYVDDDSVLYLKNMINLRREAQISLINYRRGGQPFMNLLTMIPISWDSDQVKFFVGFQVDL;ISPSAMRVLEYEPSEIIGTALSSVCHPSDIVPVTRELKDTSSGASVNVVFRIRRKNSGYMWFEGHGSLHTEQGK;CANCHTRVTPEWRRGPSGQRDLCNSCGLRWAK	438;644;987	550;717;1018	1.5e-13;3.8e-06;3.3e-10	1	CANCHTRVTPEWRRGPSGQRDLCNSC	Type IVb
116	EnsemblFungi	Ascomycota	Dothideomycetes	Mycosphaerellales	Cercospora zeina str. CMW25467	Czei4	PKS03167	MGTRLAVVGATANAYAIIPVPMLSYRKHVQPFVIGSSPIAIAGVLLSLASVHTHTRDLFFTISSPFGQCWALKRAAVASHTCPPVILIILELDILCHSGLTRRHWPAPRQLHPLRSVVEPRPRRFDAAIRRAHRVATLPQIARGVCGAITTAEQHFASRASQHRLEHTTTSPARVNTLEFAGAAAVVERTNRIGQYFVGDSRVARGQCACSGGEPQRAQVCAQQSTRDEEQQRGEALAVWQPGSITRSNTPVSTVAMSQSAPATAGYGNQNGSGPPICANCQTSTTPLWRRDESGSVLCNACGLFLKLHGRPRPISLKTDVIKSRNRVKASQAKKRDSHDGENGVQHMPNGYSAAHPDIAHLQHPVQTGHQHGLPMGGGIAGHAHDQQARSGSPNSMAR…	568	61.352	9.189	74.81	-0.508	2(o5-24i31-53o)	Nucleus	2	PF00320;PF25026	GATA zinc finger;Asd-4-like domain	CANCQTSTTPLWRRDESGSVLCNACGLFLKLHGR;QDLLSQNVTLRTRVNELEVINDLFRGRVSELEQNETHSKEQERAREEETQRLTAELATAHARAAALQRRLDELQQT	278;457	311;532	4.1e-12;8e-21	1	CANCQTSTTPLWRRDESGSVLCNAC	Type IVa
117	EnsemblFungi	Ascomycota	Dothideomycetes	Mycosphaerellales	Cercospora zeina str. CMW25467	Czei5	PKS03423	MYPGQHQHGHAEMAGSGAVEMGMMSGGASGLNGLDIDMSLPMDLDLDLSGNGDQSFNPIGVSAAPAPEMSSIITSNGAGGYSPQGQHQQQEGSMSGAGAGPLPTGFGMAPQSNQSTLTEFTKRRNWSQRIIEELKDFLHILTPDGRILYVSPSCKTITGYEPHSLIGKFIGEYVHPDDSGIFMREFNESIASGNALRFFYRFKRDDGTYMIFECDGHPHISPEPAGATSFGQTQNGQTLPVAGLCRGFFMMARPYPTKNAALLDSFLEHKIENERLMRRIMELKKEEKEENAEQERMYREQTSQTGATPSHSGMGGSREPESGTSEVPANATPNYQGMPPPAKPPISNTALTRQNLDSALSSQKPDSIADKMSRYEANNTHLESIELLTGLRYRDGERS…	526	56.813	5.999	56.67	-0.684	0(N)	Nucleus	2	PF08447;PF00320	PAS fold;GATA zinc finger	ILYVSPSCKTITGYEPHSLIGKFIGEYVHPDDSGIFMREFNESIASGNALRFFYRFKRDDGTYMIFECDGHPH;CADCGTLDSPEWRKGPKGPKTLCNACGLRWAKKEKK	147;444	219;479	3.4e-11;2.7e-11	1	CADCGTLDSPEWRKGPKGPKTLCNAC	Type IVb
118	EnsemblFungi	Ascomycota	Dothideomycetes	Mycosphaerellales	Dothistroma septosporum	Dsep1	EME40353	MNGYAYNGGYVAAHGMDHADNGHDSTMMMMDQESLAPPGTIVGGQSLDDIVNQNAKMIRRQSMPQQYGHSPQHLNPDLRRVSMLNYGSSSPAASVGQVQFQYGSNEGLDPGGYTSNAVSSATRPPLQSQDRSLSSRREDSVGDLSAHFSNPQSYTSMMPPNSAYATSPAHQNETLDLPMESPYDDAGLNLNIDYGMDQSINGNLSGDAMAVNLYSQSQFSHTPINSPLHPAQQQGTPHSGRISAHDPGGGGGMQNQSPYGQSRSSHSTVRHLSRTQSLHVPDMQSPAHSQSPLSAPPSRAQHPRQSQRTPMLQQSRSQPNGSGFAAQPQRPVPGSSQDRPVGPPTKSGFDGTNGPVAATSNAQGYNPNNQNFPWEEKEGGWPSTMVGKPHMHSAYKNAY…	1106	120.662	8.636	62.52	-0.684	0(N)	Nucleus	3	PF13426;PF08447;PF00320	PAS domain;PAS fold;GATA zinc finger	FVVCDAEKDDFPIVYCSDNFERLTGYTKHMILGRNCRFLQSPDGNVSPGVKRKYVDDDSVLYLKNMINMRRESQISLINYRRGGQPFMNLLTMIPISWDTDQVKFFVGFQVDL;ISPSALRVLEYEPSEIIGTALSSVCHPSDIVPVTRELKDTSTGASVNVVFRIRRKNSGYMWFEGHGSLHTEQGK;CANCHTRVTPEWRRGPSGQRDLCNSCGLRWAK	432;638;988	544;711;1019	1.5e-13;1.1e-06;3.3e-10	1	CANCHTRVTPEWRRGPSGQRDLCNSC	Type IVb
119	EnsemblFungi	Ascomycota	Dothideomycetes	Mycosphaerellales	Dothistroma septosporum	Dsep2	EME40931	SNCGTTKTPLWRRSPAGAVICNACGLYYKARNQMRPVGLKRGTPTTQAPTNVVIACQNCGTTITPLWRRDEAGHTICNACGLYYKLHGAHRPVQMKKAEIKRRKRV	106	11.7827	10.317	66.32	-0.539	0(N)	Nucleus	2	PF00320;PF00320	GATA zinc finger;GATA zinc finger	SNCGTTKTPLWRRSPAGAVICNACGLYYKARNQ;CQNCGTTITPLWRRDEAGHTICNACGLYYKLHG	1;56	33;88	1.1e-12;5.7e-13	2	SNCGTTKTPLWRRSPAGAVICNAC;CQNCGTTITPLWRRDEAGHTICNAC	Type IVp;Type IVa
120	EnsemblFungi	Ascomycota	Dothideomycetes	Mycosphaerellales	Dothistroma septosporum	Dsep3	EME46565	MSLYPGPGHVGVANMAATAAEMAMLGPDPSLMNGLDIDMSLPMDLDLDLSAPADHSYNPLSHQQQTNGGSSAPTQDHTLTVANGNGIGNGSYNGREQQPVETGPGAGPLPTGFGMNLQGNNSTLTEFTKRRNWSQRIIEELKDFLHILTPDGRILYVSPSCKTITGYEPHTLIGKFIGEYVHPDDGGIFMREFNESIASGNALRFFYRFKKEDGTYMIFECDGHPHISPEPPGSTSFGQTPAGQSIPVAGLCRGFFMMARPYPTRNAALLDSFLEHKIENERLLKRIEELKREELEENAEQDRLYREQSSQAGVTPSESLLAASGNGEDATLDTASQTPNYQGMPPPAKPSISNTALTRQNLDSALSSQKPDSIADKMSRYEANSTHLESIELLTGLRY…	534	57.828	5.479	67.13	-0.622	0(N)	Nucleus	2	PF08447;PF00320	PAS fold;GATA zinc finger	ILYVSPSCKTITGYEPHTLIGKFIGEYVHPDDGGIFMREFNESIASGNALRFFYRFKKEDGTYMIFECDGHPH;CADCGTLDSPEWRKGPKGPKTLCNACGLRWAKKEKK	154;450	226;485	1.2e-10;2.8e-11	1	CADCGTLDSPEWRKGPKGPKTLCNAC	Type IVb
121	EnsemblFungi	Ascomycota	Dothideomycetes	Mycosphaerellales	Dothistroma septosporum	Dsep4	EME47772	MLQYATPNVPRQPFQKPSVFGDAPSRPHSTVQHHGFEIARPSSTASHHSYEDIRQSTLNGSAGAGGSSSLSALAACASIAVPVARQGSAEGSTRSSTPCNNPTMATQPTQFSAPASTGANIAPVCQNCQTSTTPLWRRDESGSVLCNACGLFLKLHGRARPISLKTDVIKSRNRVKATGPKKRDSHGGDGVLHAQNGYPAAHPDIAHAGHHTHSQHHQHGMPMGMNGERHRVPSPGSGPNGDSHTGPHNPNIAPQHIFDTVTLPPDTFASPSLPQFSLRQPSPSASTLNGSSANHSENSHSYDALVEQNKHLSTRANELEVINGLYQGRVRELEAHEEEARRHTQSLHAELAAARARIAELEAETGSARKRVKTYSDAGDRSGNSTPAVDSGDGTSV	397	42.0567	8.543	57.63	-0.715	0(N)	Nucleus	2	PF00320;PF25026	GATA zinc finger;Asd-4-like domain	CQNCQTSTTPLWRRDESGSVLCNACGLFLKLHGR;SYDALVEQNKHLSTRANELEVINGLYQGRVRELEAHEEEARRHTQSLHAELAAARARIAELEAETGSARKRVKT	125;301	158;374	4.3e-12;1.5e-13	1	CQNCQTSTTPLWRRDESGSVLCNAC	Type IVa
122	EnsemblFungi	Ascomycota	Dothideomycetes	Mycosphaerellales	Dothistroma septosporum	Dsep5	EME49500	MDRRPQLPALSYLDVEKVKREEDAYQNRNTGTPQSLSNTSAAPSPTHQYPSGPPPPYSHAHGGPPPASQHANEWSGAQSGVHTPPESRRTSEHEKESAKQGPRQSLPSISEALGVDSQTAFASAAAAPAPLQSTHLPPPTSGPPASPSGASRRSFPMEPPQGPTTSFANGSSYSQYSQYRSDSLSQRQSYPPPADAARLPVAYPPVQESKPMLHQSSAQAHSRGPPPPASFPPPPEPSSSYEHPPNPATGSMAPPSSFPYGYTPFPPRYAGPTPPASTTSGPIHQPSTVYGAPQTASSGWKSENTARFDSRPPEQANYGDNVKRHLDFYDLEQSLNEISSVSGHLGDFARRYGDRMHQTQRAGPSPSTLPGIVEVDDMVAKSRAQLDSLLKIRDVVLAQ…	515	55.317	8.856	43.73	-0.978	0(N)	Nucleus	1	PF00320	GATA zinc finger	CHSCNRAETPEWRRGPDGARTLCNACGLHYAKL	458	490	1.9e-10	1	CHSCNRAETPEWRRGPDGARTLCNAC	Type IVb
123	EnsemblFungi	Ascomycota	Dothideomycetes	Mycosphaerellales	Dothistroma septosporum	Dsep6	EME49873	MSHDQSVALQASERHADAQRGVRPQSYALSDDSMDASAIGLDAADTATPNTRSSPRHVRFPDDQHHHDSVSGTSSAIASLTSQSTLETLSTRLDLSPTEKETRKGLLRESFFGQWKDDASHVEADTPEEMQKNDPLGTQIWKLYHKTKGQLPNSERLENLTWRMMSMNLRRKQLAESQRRLTPRPLTQQGPSGIAQLRKSSQQASQNNDDHMILDDFIIPSSIGSPAGVSPAPSGSIAEHDVSTASTSVSAIPIKQQQRLRDVDELSVARASAPSVPPVHQNRQNEEFAYVQRHVRKTSIDERRPPKRRAEASPQVPPVANTSMATEDPALEAALHDYALDMPISQPQAQHPQLPFNLDTFNLESDPVLNSAGPMQQQFTFSPVGSPMMSTSSFHQMYN…	938	100.822	6.694	50.29	-0.811	0(N)	Nucleus	2	PF08550;PF00320	Nitrogen regulatory protein areA, GATA-like domain;GATA zinc finger	IWKLYHKTKGQLPNSERLENLTWRMMSM;CTNCFTQTTPLWRRNPEGQPLCNACGLFLKLHGV	140;693	167;726	1.9e-09;3.3e-13	1	CTNCFTQTTPLWRRNPEGQPLCNAC	Type IVa
124	EnsemblFungi	Ascomycota	Dothideomycetes	Mycosphaerellales	Pseudocercospora eumusae str. CBS 114824	Peum1	KXS93593	MATSHGENPAPPSRPKPLSPTMSVLGLQREHSQQEVEAARQLLEHSQASASHGPVRDPTSSPSTSHANPTPSSAPAPAPAHRDTYTIARYAQSSPQTSTVTPTLNPERRSPPSSSSAPGAQMCSNCGTTKTPLWRRSPAGAVICNACGLYYKARNQMRPVGLKRGSVGPSQDGGQSHDRQTSPSTSSIHGGATYVSADQSVNGTCPGGGRCNGTGGQEACSGCPVYNNRIAKTAQVTLRHQNQPEPQNEGSAYMRTVVQQTTPQPQQPQNVTVACQNCGTTITPLWRRDEQGHTICNACGLYHKLHGSHRPVQMKKAEIKRRKRVVPASSSSSHQNPQPDAGGYNDAMSDHSDQRATPDQAPPIPVDFTEAFRNKKRTFSATEPYPHPQTSAGESSPVL…	441	47.463	9.139	48.1	-0.934	0(N)	Nucleus	2	PF00320;PF00320	GATA zinc finger;GATA zinc finger	CSNCGTTKTPLWRRSPAGAVICNACGLYYKARNQ;CQNCGTTITPLWRRDEQGHTICNACGLYHKLHGS	123;275	156;308	8.9e-13;1.6e-11	2	CSNCGTTKTPLWRRSPAGAVICNAC;CQNCGTTITPLWRRDEQGHTICNAC	Type IVa;Type IVa
125	EnsemblFungi	Ascomycota	Dothideomycetes	Mycosphaerellales	Pseudocercospora eumusae str. CBS 114824	Peum2	KXS94960	MAASAPDMGLMGNNGPNSLSALDIDMSLPMDLDLDLSGSADQSFANLGAHPVGNGASAAPSQDPNVSSSNGNSHVAYTPGHNQQQDDAMSLTGAGAGPLPTGFGVPPQSGSSTLTEFTKRRNWSQRIIEELKDFLHILTPDGRILYVSPSCKAITGYEPHSLIGKFIGEYVHPDDSGIFMREFNESIASGNALRFFYRFKKEDGAYMIFECDGHPHISPEPPGATSFGQTPTGQTLPVSGLCRGFFMMARPYPTKNAALLDSFLEHKIENERLMRRIEELKREEMEENAEQERLYREQASSQAGATPSHSGPAGSLAQDGLSEAPNATPNYQGMPPPAKPPVSNTALTRQNLDSALSAQKPDSIADKMSRYEASNTHLESIELLTGLRYRDGERSHGIS…	527	56.4084	5.664	63.62	-0.598	0(N)	Nucleus	2	PF08447;PF00320	PAS fold;GATA zinc finger	ILYVSPSCKAITGYEPHSLIGKFIGEYVHPDDSGIFMREFNESIASGNALRFFYRFKKEDGAYMIFECDGHPH;CADCGTLDSPEWRKGPKGPKTLCNACGLRWAKKEKK	144;440	216;475	1.9e-10;2.7e-11	1	CADCGTLDSPEWRKGPKGPKTLCNAC	Type IVb
126	EnsemblFungi	Ascomycota	Dothideomycetes	Mycosphaerellales	Pseudocercospora eumusae str. CBS 114824	Peum3	KXT02835	MSHAQPALRQASSRHGDERGGAGTGTGTGTVALHSDAFSDDSMDAAGIGLDSADTTASRSTAQSSPRHVRFPESHYDTSSATSTSGTSSAIASLTSQSTLDTLSTRLDLSPNEKETRAGLLRESFFEPFKHDASALDNESPEEMQKQDPLGTQIWKLYYKTKGQLPNSERLENLSWRMMSMNLRRKELERQGRLTNPPLRGQNAPSGIAQLRKSSEQASQNQSRTAHEDHMNLDEFIVPSSIGTPAGVSPTPSGSVAEAEPSSISTSLSAIPIKQHQRIQAEELSLARASAPSVPPLAQDRQNLEFGYVQKHVRKTSIDERRPPKRRAEASPQVPPVNNSTMDARDHATGLHDYSLDSHVTAAPQAQHPPIPFNLDTFNLDNDPILNSAGPMTQNFTFS…	953	101.567	6.692	48.49	-0.788	0(N)	Nucleus	2	PF08550;PF00320	Nitrogen regulatory protein areA, GATA-like domain;GATA zinc finger	IWKLYYKTKGQLPNSERLENLSWRMMSM;CTNCFTQTTPLWRRNPEGHPLCNACGLFLKLHGV	154;707	181;740	1.5e-08;7.4e-13	1	CTNCFTQTTPLWRRNPEGHPLCNAC	Type IVa
127	EnsemblFungi	Ascomycota	Dothideomycetes	Mycosphaerellales	Pseudocercospora eumusae str. CBS 114824	Peum4	KXT03095	MPTTEILVAPLTAGSNIGDPDNAAAVVMKEVGDRLAATDGVQQINFGTWVESPDTFQLLVNWDKIDSHKAFMATEVYKPFLQRFLTITAGPPRMIHADLQPEHEFSNAVSAPVTEVATFYFGGDAPADYLEGVEKFRQMMEKDGADGFVGACVGVTYEDDNEREGVKGKAAVLLIGWESVDKHMAFRETSTFKDNIKLLRNGAQKIEMHHVQFMNFVAGLMPQGYASSPHHLNPDMRRISMMDYGQGSPAASVGSFNYDPNSSFDHSGIASGAVTPAGAVQQPRQTQHTRRPSATALALDTNFNTTTTNNNTYHHPAMPPNTAYDTSPAHPATTVDMDLGADQYLDSGMAMNMDFSVDQNLANAMSQETMQMPLYNQPQFNNHSALSSPMHPQAQQGTP…	1243	136.324	6.55	64.26	-0.583	0(N)	Nucleus	3	PF13426;PF08447;PF00320	PAS domain;PAS fold;GATA zinc finger	FVVCDAEKDDFPIVYCSENFERLTGYTKHMILGRNCRFLQSPDGQVEPGIRRKYVDDDSVLYLKNMINLRRESQISLINYRRGGQPFMNLLTMIPITWDTEQVKFFVGFQVDL;ISPSALRVLEYEPSEIIGTALSSLCHPSDIVPVTRELKDTSTGASVNVVFRIRRKNSGYMWFEGHGSLHTEQGK;CANCHTRVTPEWRRGPSGQRDLCNSCGLRWAK	586;792;1131	698;865;1162	4.4e-13;6.9e-07;1.6e-10	1	CANCHTRVTPEWRRGPSGQRDLCNSC	Type IVb
128	EnsemblFungi	Ascomycota	Dothideomycetes	Mycosphaerellales	Pseudocercospora eumusae str. CBS 114824	Peum5	KXT06707	MLSYALSNPPQSFQRPMFAEPISPSHDIRNSDYDTKGRRPSRPSYSSIGEQDRQASLDSGIGALGALANIAANAPAAITNQGSSGSGENTRSSTPTSSTAMAMSQTAPAATAGYGNQNGSAPPICANCQTSVTPLWRRDESGSVLCNACGLFLKLHGRPRPISLKSDVIKSRNRVKTSQPKKRDSPGGQDGNGLMLTNGYSAAHPDAAHVAAHAPGTINGHQHGFPMGGMTGHMGEPSLASRSNTPGLHQQNSNHSIAPQHIFDTVSLPSDTFASPSLPAFNLRNPSPAPTANGNASHMGVSSNHEDLVNQNNTLRTRVSELEVINDLFRGRVSELEASEQDARQKERSKDAEVQRYLAELATAKSRAAELERRLKEFEEEGPARKKARTDSDSNRDTT…	408	43.3692	7.791	58.75	-0.741	0(N)	Nucleus	2	PF00320;PF25026	GATA zinc finger;Asd-4-like domain	CANCQTSVTPLWRRDESGSVLCNACGLFLKLHGR;NHEDLVNQNNTLRTRVSELEVINDLFRGRVSELEASEQDARQKERSKDAEVQRYLAELATAKSRAAELERRLKEFEEE	125;304	158;381	1.5e-11;1.8e-22	1	CANCQTSVTPLWRRDESGSVLCNAC	Type IVa
129	EnsemblFungi	Ascomycota	Dothideomycetes	Mycosphaerellales	Pseudocercospora fijiensis CIRAD86	Pfij1	EME78226	MMMMMGQDGMGGGAGGQSLDEIVNQNAKMIRRQSVPQGYGSSPHHLNPDMRRISMMDYGQGSPAASVASFTYDPNSSFDHSGIASGGVTPARAVQQPRQAQHTRRPSAADLALDTNFTNTTNNYHHAAMPPNTAYDASPAHPATTVDMNLDTDQYLDSGMAMNMDFSVDQNLANAMSQENMHMPLYNQAQFNSHSALSSPMHPQAQQGTPRSGRMSQHDQGGRSQYGSVSGAGSAHPTVRQLSRTQSLHIADHMSPAGHASSPLSAPPASAPRMLPQEQPQVPTHMAQPGFAKQPQNPATGSQFDRGVNRPSQQGYDGINGPVPIDRSKYNPNNQNFPWETPEGGWPSTMVGKPHTSSIYKNAYSSTGFDMLGVLMRVATRPNPEINIGSVDLSCAFVV…	1052	115.411	8.471	62.04	-0.655	0(N)	Nucleus	3	PF13426;PF08447;PF00320	PAS domain;PAS fold;GATA zinc finger	FVVCDAEKDDFPIVYCSENFERLTGYTKHMILGRNCRFLQSPDGQVEPGIRRKYVDDDSVLYLKNMINLRRESQISLINYRRGGQPFMNLLTMIPITWDTEQVKFFVGFQVDL;ISPSALRVLEYEPTEIIGTALSSLCHPSDIVPVTRELKDTSTGATVNVVFRIRRKNSGYVWFEGHGSLHTEQGK;CANCHTRVTPEWRRGPSGQRDLCNSCGLRWAK	397;603;942	509;676;973	3.5e-13;1.1e-06;3.1e-10	1	CANCHTRVTPEWRRGPSGQRDLCNSC	Type IVb
130	EnsemblFungi	Ascomycota	Dothideomycetes	Mycosphaerellales	Pseudocercospora fijiensis CIRAD86	Pfij2	EME78929	MATSHGESPAPPSRPKPLSPTMSVLGLQREHSQQEVEAARQLLEHSQASASHAPVRDPAPSTSSSHAQPSPSSAPVYRDTYTIARHAQSSPQPSTVTPTLNPERPSPPSSSAPGAQMCSNCGTTKTPLWRRSPAGAVICNACGLYYKARNQMRPVGLKRGSVASSQEGGQSHDRQTSPSTSSIHGGATYVSADQSVNGTCPGGGRCNGTGGQEACNGCPAYNNRIAKTAQVALRSEPNESAYLRTVVHQPTPQTPQPQNVVVACQNCGTTITPLWRRDEQGHTICNACGLYHKLHGSHRPVQMKKAEIKRRKRVVPAHQSAINQTDPTYNDAMSDHSGPSDHRATPDRPGAPIPVDFTEAFRHRDDVGDGKKRTFSEAEGPYYPHPQNSGTENVLDHPG…	434	46.9043	8.677	50.21	-0.917	0(N)	Nucleus	2	PF00320;PF00320	GATA zinc finger;GATA zinc finger	CSNCGTTKTPLWRRSPAGAVICNACGLYYKARNQ;CQNCGTTITPLWRRDEQGHTICNACGLYHKLHGS	118;264	151;297	8.7e-13;1.5e-11	2	CSNCGTTKTPLWRRSPAGAVICNAC;CQNCGTTITPLWRRDEQGHTICNAC	Type IVa;Type IVa
131	EnsemblFungi	Ascomycota	Dothideomycetes	Mycosphaerellales	Pseudocercospora fijiensis CIRAD86	Pfij3	EME83354	MSLSGAGAGPLPTGFGMPPQSGSSTLTEFTKRRNWSQRIIEELKDFLHILTPDGRILYVSPSCKAITGYEPHSLIGKFIGEYVHPDDSGIFMREFNESIASGNALRFFYRFKKDDGTYMIFECDGHPHISPEPPGATTFGQTPTGQTLPVSGLCRGFFMMARPYPTKNAALLDSFLEHKIENERLMRRIEELKREEMEENAEQERLYREQASSQAGATPSHSGPAGSLAQDGLSEAPNATPNYQGMPPPAKPPISNTALTRQNLDSALSAQKPDSIADKMSRYEASNTHLESIELLTGLRYRDGERSHGISTGDTSPALIRGDAGIAILLDRDRESSKKEKKKLKVADEYVCADCGTLDSPEWRKGPKGPKTLCNACGLRWAKKEKKRTGDDVKTNSPG…	436	47.4179	6.616	60.99	-0.651	0(N)	Nucleus	2	PF08447;PF00320	PAS fold;GATA zinc finger	ILYVSPSCKAITGYEPHSLIGKFIGEYVHPDDSGIFMREFNESIASGNALRFFYRFKKDDGTYMIFECDGHPH;CADCGTLDSPEWRKGPKGPKTLCNACGLRWAKKEKK	56;352	128;387	6.1e-11;2.1e-11	1	CADCGTLDSPEWRKGPKGPKTLCNAC	Type IVb
132	EnsemblFungi	Ascomycota	Dothideomycetes	Mycosphaerellales	Pseudocercospora fijiensis CIRAD86	Pfij4	EME86387	MSQTAPAATAGYGNQNSSAPPICGNCQTSVTPLWRRDESGSVLCNACGLFLKLHGRPRPISLKSDVIKSRNRVKTSQPKKRDSQGGQDGSGLMLPNGYAAAHPDAAHLATHAPGTINGHQHGFPMGSMTGHMGEPSPGSRSNTPSLHQQNNNHSIAPQHIFDTVSLPSDTFASPSLPAFNLRNPSPAPTTNGHGSHMGVSSNYEDLVNQNNTLRTRVSELEVINDLFRGRVSELEASEQDARQKERSKDAEVQRYLAELATAHSRAAELERRLKELVEDGPARKKARTDSDSNRDTVSESGSAVAE	306	32.8698	7.806	60.98	-0.78	0(N)	Nucleus	2	PF00320;PF25026	GATA zinc finger;Asd-4-like domain	CGNCQTSVTPLWRRDESGSVLCNACGLFLKLHGR;NYEDLVNQNNTLRTRVSELEVINDLFRGRVSELEASEQDARQKERSKDAEVQRYLAELATAHSRAAELERRLKELV	23;202	56;277	5.1e-11;3.6e-23	1	CGNCQTSVTPLWRRDESGSVLCNAC	Type IVa
133	EnsemblFungi	Ascomycota	Dothideomycetes	Mycosphaerellales	Pseudocercospora fijiensis CIRAD86	Pfij5	EME87705	MSLECGTRVQVGRLRLLPPSTDVVVQQASFDAFPHYSAECSLPSTLDTLSTTLDLSPNEKETRKGLLRQSFFEPFKDDASALDADSPEEMQKQDPLATQIWKLYHKTKGQLPNSERLENLSWRMMSMNLRRKELERQGGIAQLRKSSEQASQNQSKTAHEDPMNLDEFLVPSSIGTPAGVSPTPSGSLAEAEPSSTSTSLSAIPIKQHQRIQAEELSLARASAPSVPPLAQDRQHFEFGYVQKHVRKTSIDERRRRAEASPQVPPVNNSTMEACDHATGLHDYSLDSHVTAAPQAQHPPIPFDLDTFNLDNDPILDSAGPMTQNFTFSPVGSPMMSTRGFNHLYSTAMPPPQSASTFQSPSGSAYPSTASTPQPIPEGEQMFFGNQLHPTHSVPTFQQH…	876	94.0402	6.741	50.27	-0.725	0(N)	Nucleus	2	PF08550;PF00320	Nitrogen regulatory protein areA, GATA-like domain;GATA zinc finger	IWKLYHKTKGQLPNSERLENLSWRMMSM;CTNCFTQTTPLWRRNPEGHPLCNACGLFLKLHGV	100;630	127;663	7.3e-10;6.8e-13	1	CTNCFTQTTPLWRRNPEGHPLCNAC	Type IVa
134	EnsemblFungi	Ascomycota	Dothideomycetes	Mycosphaerellales	Pseudocercospora fijiensis CIRAD86	Pfij6	EME87970	MDTQRRDKPKREDDVYQNRTSGTGTGTGTGTGTLQSLSASAGASPTYRYPQGAPAPYGHAHSVAPTNTWPSTPVGVHTPPESRRTSDNEKGSAKQRQSLPSISEALGIDRQTSTAADPPPPLQPTHLTQTQATTPSSPSPATRRSFPMEPPQGPQPPYSTTSSSFSQYSHYRSPESQQPAYPPPSENSRPTPAAYPPVTESKPPLQLQTSQPTSRPPPSTTFARPAEPSPAYEQPNSTSTGPMGPPSSFPYGYTPYPPRYANPTPPSSTASGPIYQPSVYSAPQAAQTTWKTADRSDERAQAPASYGDSVKRHLDFYDLEAALNEIAATSGILSDFSRRYGDRMHQTQRSGATLKTLPGIVEVDDMINKSRVAHDSLMKIRDVIIQQQAAYEQQAADQR…	503	54.49	9.285	40.1	-1.071	0(N)	Nucleus	1	PF00320	GATA zinc finger	CHSCNRAETPEWRRGPDGARTLCNACGLHYAKL	445	477	1.9e-10	1	CHSCNRAETPEWRRGPDGARTLCNAC	Type IVb
135	EnsemblFungi	Ascomycota	Dothideomycetes	Mycosphaerellales	Pseudocercospora musae str. CBS 116634	Pmus1	KXT04460	MNGYSYNGQYDGGGMQHGDDGTAQSMLMMMGQDGMSAGAGGQSLDDIVNQNAKMIRRQSMPQGYGSSRHHLNPDMRRISMMDYGQGSPAASVGSFNYDPNSSFDHSGIASGGVTPAGAVQQPRQAQHTRRPSATDLALDTTFATTTNSYHHAAVPPNTAYDTSPAHPATTVDMNLDADQYLDSGMAMNMDFSVDQNLANSMSQETMQMSLYNQPQFNNRSALSSPMRPPAQQGTPQSGRMSQHDPGGRSQYGSVSGGGSAHPTVRHLSRTQSLHVPDHMSPGGHGSSPLSAPPTAAPRMSPQQHPQVPNHMTQAGFAKQPQNPVTGSQYDRGVNRPSQQGYDGINGPVPIDRSKYNPNNQNFPWETPEGGWPSTMMGKPHTSSIYKNAYSSTGFDMLGV…	1076	117.77	8.17	60.09	-0.68	0(N)	Nucleus	3	PF13426;PF08447;PF00320	PAS domain;PAS fold;GATA zinc finger	FVVCDAEKDDFPIVYCSENFERLTGYTKHMILGRNCRFLQSPDGQVEPGIRRKYVDDDSVLYLKNMINLRRESQISLINYRRGGQPFMNLLTMIPITWDTEQVKFFVGFQVDL;ISPSALRVLEYEPSEIIGTALSSLCHPSDIVPVTRELKDTSTGASVNVVFRIRRKNSGYMWFEGHGSLHTEQGK;CANCHTRVTPEWRRGPSGQRDLCNSCGLRWAK	422;628;967	534;701;998	3.6e-13;5.8e-07;3.2e-10	1	CANCHTRVTPEWRRGPSGQRDLCNSC	Type IVb
136	EnsemblFungi	Ascomycota	Dothideomycetes	Mycosphaerellales	Pseudocercospora musae str. CBS 116634	Pmus2	KXT08019	MATSHGQGPAPSSRPSPLSPTMSVLGLQREHSQQDVEAARQLLEHSQASASHAPVRHPTPTSSTRHAQPSPSSAPAYRETYTVARYAQSSPQTSTLTPTLNPERRSPPSSSAPGAQMCSNCGTTKTPLWRRSPAGAVICNACGLYYKARNQMRPVGLKRGSVGPSQEGGQPHDRQTSPSTSSIHGGATYVSADQSVNGTCPGGGRCNGTGGQEACNGCPAYNNRIAKTAQVALRPQNPSESQTSESAYMRTVVQQSTPSQAPPQNVVVACQNCGTTITPLWRRDEQGHTICNACGLYHKLHGSHRPVQMKKAEIKRRKRVVPASHQNQTDAGGYNDAMSDHSDQRATPDHGPIPVDFTEAFRNREDVGDLAPPPKKRTFSAATEPYPPHPQNLASSSPG…	454	48.8505	9.059	50.4	-0.909	0(N)	Nucleus	2	PF00320;PF00320	GATA zinc finger;GATA zinc finger	CSNCGTTKTPLWRRSPAGAVICNACGLYYKARNQ;CQNCGTTITPLWRRDEQGHTICNACGLYHKLHGS	118;270	151;303	9.2e-13;1.6e-11	2	CSNCGTTKTPLWRRSPAGAVICNAC;CQNCGTTITPLWRRDEQGHTICNAC	Type IVa;Type IVa
137	EnsemblFungi	Ascomycota	Dothideomycetes	Mycosphaerellales	Pseudocercospora musae str. CBS 116634	Pmus3	KXT10003	MDPSRRPQLPAISYLADGDKVKREDDVYTNRHPGTGTPQSLSASAGASPTYHYPQASPAPYAHAHGVPPTNTWPSASVGVRTPPESRRTSENEKEGAKQRQSLPSISEALGIDRQTSIAADPHPPLQPTHLTHTQATAPSSPTPSTGRSFPMEPPQGPQPPYSTTGSTFPQYSHYRSESQQPSYPPPSEASRPTPAAYAPVTETKPPLQLQTPQPTSRPPPSTTFARPAEPSPSYEQPNSASAGSMGPPSSFPYGYTPYPPRYANPTPPSSTASGPTYQPSVYSAPQPAPPTWKTADRSDERSQGPANHGDSVKRHLDFYDLEAALNQIAATSGILSDFCRRYGDRMHQTQRSGATLKTLPGIVEVDDMISKSRVAHDSLMKIRDVIIQQQAAYEQQAA…	506	54.8787	9.086	41.6	-1.047	0(N)	Nucleus	1	PF00320	GATA zinc finger	CHSCNRAETPEWRRGPDGARTLCNACGLHYAKL	448	480	1.9e-10	1	CHSCNRAETPEWRRGPDGARTLCNAC	Type IVb
138	EnsemblFungi	Ascomycota	Dothideomycetes	Mycosphaerellales	Pseudocercospora musae str. CBS 116634	Pmus4	KXT14238	MLSYAASNPPQSFQRPMFAEPLSRSHDIRNSDYDTKARRPSRASCSSISEQTRQASFDSGSGALGALANIAANAPAAITNRGSSGSGENTRSSTPTSSTAMSQTAPAATAGYGNQNGSAPPICANCQTSVTPLWRRDESGSVLCNACGLFLKLHGRPRPISLKSDVIKSRNRVKTSQPKKRDSQGGQDGNGLINTNGYAAAHPDAAHAPATINGHQHGFPMGSMTGHMGEPALGSRSNTPGLHHQHSNHSIAPQHIFDTVSLPSDTFASPSLPAFNLRNPSPAPTTNGNGSHIGASSNYEDLVNQNNTLRTRVSELEVINDLFRGRVSELEASEQDARQKERSKDAEVQQYLAELATASSRAAELERRLKELEDDGPVRKKARTDSGSNRDTISEPGSA…	402	42.6763	8.583	58.91	-0.746	0(N)	Nucleus	2	PF00320;PF25026	GATA zinc finger;Asd-4-like domain	CANCQTSVTPLWRRDESGSVLCNACGLFLKLHGR;NYEDLVNQNNTLRTRVSELEVINDLFRGRVSELEASEQDARQKERSKDAEVQQYLAELATASSRAAELERRLKELED	123;298	156;374	1.5e-11;2.8e-23	1	CANCQTSVTPLWRRDESGSVLCNAC	Type IVa
139	EnsemblFungi	Ascomycota	Dothideomycetes	Mycosphaerellales	Pseudocercospora musae str. CBS 116634	Pmus5	KXT16603	MAASAPDMGLMGTGPHSLSALDIDMSLPMDLDLDLSGSADQSFANLGAHPVGNGVSSAPSQDPNVSSSNGNGIAAYTPGHNQQQDDGMSLTGAGAGPLPTGFGMPPQSGSSTLTEFTKRRNWSQRIIEELKDFLHILTPDGRILYVSPSCKAITGYEPHSLIGKFIGEYVHPDDSGIFMREFNESIASGNALRFFYRFKKEDGTYMIFECDGHPHISPEQPGATTFGQTPTGQTLSVSGLCRGFFMMARPYPTKNAALLDSFLEHKIENERLMRRIEELKREEMEENAEQERLYREQASSQAGATPSHSGPAGSLAQDCLSEAPNATPNYQGMPPPAKPPVSNTALTRQNLDSALSAQKPDSIADKMSRYEASNTHLESIELLTGLRYRDGERSHGIST…	526	56.3755	5.664	62.26	-0.583	0(N)	Nucleus	2	PF08447;PF00320	PAS fold;GATA zinc finger	ILYVSPSCKAITGYEPHSLIGKFIGEYVHPDDSGIFMREFNESIASGNALRFFYRFKKEDGTYMIFECDGHPH;CADCGTLDSPEWRKGPKGPKTLCNACGLRWAKKEKK	143;439	215;474	4.8e-11;2.7e-11	1	CADCGTLDSPEWRKGPKGPKTLCNAC	Type IVb
140	EnsemblFungi	Ascomycota	Dothideomycetes	Mycosphaerellales	Pseudocercospora musae str. CBS 116634	Pmus6	KXT19050	MSHAQPALRDERGGAVALHSDAFSDDSMHVSGIGLDCADTTASTSTAAQSSPRHVRFPESRYDASSATSASGTSSAIASLTSQSTLDTLSTTLDLSPNEKETRKGLLRESFFEPFKDDASALDTESPEEMQKQDPLGTQIWKLYHKTKGQLPNSERLENLSWRMMSMNLRRKELERQGRLTNPSLRAQNAPSGIAQLRKFSEQASQHQTRTAHEDHMNLDEFLVPSSIGTPAGVSPAPSGSVAEAEPSSTSTSLSAIPIKQPQRIQAEELSLARASAPSVPPLAEDRQNLEFGYVQKHVRKTSIDERRPPKRRAEASPQVPPVNNSAMEARDHATGLHDYSLDSHVTAAPQAQHPPIPFNLDTFNLDHDPILNSAGPMTQNFTFSPVGSPMMSTGAFSH…	937	99.885	6.516	51.5	-0.722	0(N)	Nucleus	2	PF08550;PF00320	Nitrogen regulatory protein areA, GATA-like domain;GATA zinc finger	IWKLYHKTKGQLPNSERLENLSWRMMSM;CTNCFTQTTPLWRRNPEGHPLCNACGLFLKLHGV	140;691	167;724	7.8e-10;7.3e-13	1	CTNCFTQTTPLWRRNPEGHPLCNAC	Type IVa
141	EnsemblFungi	Ascomycota	Dothideomycetes	Mycosphaerellales	Ramularia collo-cygni	Rcol1	CZT17509	MSYHPGQDGIPNMGMRHEGGSMLDYDVSMDLDLDLSGPGDHSFGAITPQHVSSGNVASAVAGDQHLGASNGGGGSTFSSQTQQQDTQMTGAGAGPLPSSFGMAAPXNTSTLTEFTKRRNWSQRIIEELKDFLHILTPDGRILYVSPSCKHITGHDPHTLIGKFIGEYVHPDDSGIFMREFNESIASGNGLRFFYRFKKDDGTYMIFECDGHPHISPEPPNSASYGQTPASKSQAAGLCRGFFMMARPYPTRNAALLDSFLEHKIENERLMKRIEELKREEAEENAEQDKLFREXGTSQGVAATVTASESQRASQATGDGASENPAPTPNYQGMPPPAKPTISNTALTRQNLDSALSAQRPDSIADKMSRYEASNGHLESIELLTGLRYRDGERSHGIST…	523	56.1677	5.841	58.35	-0.691	0(N)	Nucleus	2	PF08447;PF00320	PAS fold;GATA zinc finger	ILYVSPSCKHITGHDPHTLIGKFIGEYVHPDDSGIFMREFNESIASGNGLRFFYRFKKDDGTYMIFECDGHPH;CADCGTLDSPEWRKGPKGPKTLCNACGLRWAKKEKK	141;439	213;474	4.1e-09;2.7e-11	1	CADCGTLDSPEWRKGPKGPKTLCNAC	Type IVb
142	EnsemblFungi	Ascomycota	Dothideomycetes	Mycosphaerellales	Ramularia collo-cygni	Rcol2	CZT18673	MNNGYGYGGNYNANGNGSGHGDGNGLDSQQGSGMMMMDQEGMLGGSGQSLDDIVNQNAKLIRRQSMPQTFGNNAQHPDMRRISMMDYGSGSPGNHSNNYQFDTSSGMDPSGYGGGGMTPTANNQSRPSLSRPGSVADLSLDTGYGNNSQAYGSMMPPNSAYSQSPAXATNALDMSMGSPYIDNSMSMNMDFEGLGTPMSGDAMMAGVYSQQSYNPSQSLTPMHAPPNTSQGTPHSGKTMTPDHGGQSVHHSYSGSVGSATPNTVRHHPRAPGLHVPDLNSPGHGASPLSQPPMSVQSQMRSQSSPQHPQTQQSPPRTSHQQPQQGRLQRPQLVQHQHQTSPASFTPTTQPSNTGNPEAGSVQHAGFDRGTSEHVPTSGTPYNPNNQGFAWDAPEGGWPT…	1113	120.417	8.56	58.72	-0.686	0(N)	Nucleus	3	PF13426;PF08447;PF00320	PAS domain;PAS fold;GATA zinc finger	AFVVCDAEKDDMPIVYCSDNFERLTGYTKHMILGRNCRFLQSPDGNVVSGIRRKYVDDDSVVYLKNMITSRREAQISLINYRRGGQPFMNLLTIIPITWDGDSVKFYVGFQVDL;VSPSALRVLEYEPGEIIGTALSSVCHPSDIVPVTRELKDTSTGASVNVVFRIRRKNNGYMWFEGHGSLHTEQGK;CANCHTRVTPEWRRGPSGQRDLCNSCGLRWAKL	447;654;997	560;727;1029	1.6e-13;1e-06;2.7e-10	1	CANCHTRVTPEWRRGPSGQRDLCNSC	Type IVb
143	EnsemblFungi	Ascomycota	Dothideomycetes	Mycosphaerellales	Ramularia collo-cygni	Rcol3	CZT19923	MLQYAAPSATQTFSKSSSIFSEPPSKRATSASQSFESHLTSYNTPRPPANTSITKHDESRRSFGGVSDSDASTALSQLASLAAQAPAAAMNPSSGSGDSTRSGTPSTHNAASMTATNPAQYAASSNQSSQNGGPPVCQNCQTSTTPLWRRDESGSVLCNACGLFLKLHGRARPISLKTDVIKSRNRVKTAQPKKRDSNGDGLMHAPNGFAAAHPDMAAHQHGLPMGMGMEHMQRVPSPSAASRSNTPQIYDNIPDTFASPGLSAYHVRQHSPPTSSLNNGTTGGQMDHRHGYDATIQTLRTRVSELEVINDLFRGRVSELEASEQDARRNELSKAEEVQRLSSALEAANAKIAELEAEGPARKKSKTESGDSTPIV	376	39.9125	8.857	55.45	-0.708	0(N)	Nucleus	2	PF00320;PF25026	GATA zinc finger;Asd-4-like domain	CQNCQTSTTPLWRRDESGSVLCNACGLFLKLHGR;ATIQTLRTRVSELEVINDLFRGRVSELEASEQDARRNELSKAEEVQRLSSALEAANAKIAELEA	137;294	170;357	4e-12;9.9e-19	1	CQNCQTSTTPLWRRDESGSVLCNAC	Type IVa
144	EnsemblFungi	Ascomycota	Dothideomycetes	Mycosphaerellales	Ramularia collo-cygni	Rcol4	CZT22342	MSQARAALRQARMRHGDEEEEGKERGSGGXVPSDESMALPSSPRHVRFPDTRYDTTSGSSSXIASLTSTSTLDTLPTRLDLSPTERDARKGLLRESFFDHWKDDAAPLEAEDSPEEMQRKDPLGAQIWRLYAKTKGQLPNSERLENLSWRMMAMNLKRQQNLERQQGLHAQSRPKGQNAPSGIAQLRSSEQASKTQDDTMNLDDFIVPSSIGTPAGVSPDSSSADGDIATTGTISAIPIKQQQRLQADDLSLARASAPSVPPLEQTRGHQEFSYVQRRVRKTSIDERRPPKRRAEASPQVPPVNSTTMAAQDPAGDAGLLDYSLDGPTTAHPHPHHTTLPFNLDTFNLENDPIIHSAGPMQGHFGFSPVGSPMLNTGNFQSVYNAQSSMPPPGPSGFQS…	933	100.467	7.859	46.75	-0.853	0(N)	Nucleus	2	PF08550;PF00320	Nitrogen regulatory protein areA, GATA-like domain;GATA zinc finger	IWRLYAKTKGQLPNSERLENLSWRMMAM;CTNCFTQTTPLXRRNPEGHPLCNACGLFLKLHGV	127;690	154;723	9e-10;3.6e-10	1	CTNCFTQTTPLXRRNPEGHPLCNAC	Type IVa
145	EnsemblFungi	Ascomycota	Dothideomycetes	Mycosphaerellales	Ramularia collo-cygni	Rcol5	CZT24465	MDSSRRPQLPALSYLDIDKVKREEEYYQHRHTASGASKSLSSSAGASPTYQYPSGPPPPYSHTHGANPQPTMHANNWSGNQQAVHTPPAREHEREGAKQNARQSLPSISEALGVDRQTPFATSQPQPPAPQPSAQHSHPHIARPPSTAPASPPAATRRSYPMDPPAPTSYPSGGNAYSSHFPHQRPEATQQPYYAPAQGPAPEQQTPSRMNAHQTGPSQPASYSRPSESYEPSLPPPPPPSQSHSAGSMAPPAVPYGYTPYPPRYASSTPAPPPPAPAAPAQSXSSGPIYQPSTLYAPPQSASSGWKAETNARFEDRQSGPAAYGDNVKRHLDFYDLESALNEIASTSGILSDFSRRYGDRMHHTQRSGPALSTLPGIVEVDDMVSKSRVQLDSLLKIR…	525	56.386	9.035	42.65	-1.023	0(N)	Nucleus	1	PF00320	GATA zinc finger	CHSCNRAETPEWRRGPDGARTLCNACGLHYAKL	464	496	2e-10	1	CHSCNRAETPEWRRGPDGARTLCNAC	Type IVb
146	EnsemblFungi	Ascomycota	Dothideomycetes	Mycosphaerellales	Ramularia collo-cygni	Rcol6	CZT25246	MRPLSPRIPALLQRQPSQQELEVARQLVEHSQSAYPQYDPQLSDESSRIMQQTTEQLIAAAHGRDSDMGGNMHQQNPQPSPGPSIAESATSSRTSPTTGPSPGGQXCSNCGTTKTPLWRRSPAGAVICNACGLYYKARNQMRPVEMKRGAASTSQPADGQSHDRQPSPPSNRATYVAADQIQAGTCPGGGRCNGTGGKEGCGGCPAYNNRISKTAQFALRQATTDPSEPTPXQQHMQTIVQNYIPPSQSATSVVVACQNCGTTVTPLWRRDEAGHTICNACGLYHKLHGSHRPVQMKKAEIKRRKRVVPATGGQHVEHPYPNENLSDSGHSDQPSVQPSLMDMGPEGESYAQAYETVPLRTIPVDFTEAFQQRRVSGESRKRTFTDRGHGEDTDHYQNE…	455	49.5361	7.227	50.24	-0.949	0(N)	Nucleus	2	PF00320;PF00320	GATA zinc finger;GATA zinc finger	CSNCGTTKTPLWRRSPAGAVICNACGLYYKARNQ;CQNCGTTVTPLWRRDEAGHTICNACGLYHKLHGS	107;257	140;290	9.2e-13;2e-11	2	CSNCGTTKTPLWRRSPAGAVICNAC;CQNCGTTVTPLWRRDEAGHTICNAC	Type IVa;Type IVa
147	EnsemblFungi	Ascomycota	Dothideomycetes	Mycosphaerellales	Sphaerulina musiva SO2202	Smus1	EMF08685	MNGYGSYNGGYSADQHHDDGATNVMQMMGTDGMGAMAGGMVGGQTLDDIVSQNAKMIRRQSMPMAQNYNASPHHLTPDMRRISMMDYGANSPAASMNSFQYDPSGGMDGTGFASGAVTPAASSQQPRRTQTSRRLSGGEVSLDTSFQNGQQNYTSMMAPNSAMDTSPAHASATIDMSAMQASPYIDNSMTMNIDDYGVDANGLSSALSQDPMHMNLYNQSQFNTSNFSSPIHPSQQQQQQQQQQQGGVTPQSGRLSSHDPGGGSGQHSQYGTLAAPQPAAGRQLSRTQSLQVPDHLGSPAHGSSPHGASPMSAAVSVHSSRPPLQSSLSHTSNTGSNAGFAGQPQHPIPGSSEDRGMNRQLDGVNGPVPVKAQNYNPNNQNFPWEMPKGGWPSTMVGKP…	1112	121.064	8.57	60.27	-0.653	0(N)	Nucleus	2	PF13426;PF00320	PAS domain;GATA zinc finger	FVVCDAEKDDFPIVYCSENFERLTGYTKHMILGRNCRFLQSPDGNVVPGIRRKYVDDDSVLYLRNMVNLRREAQISLINYRRGGQPFMNLLTMIPITWDSDQVKFFVGFQVDL;CANCHTRVTPEWRRGPSGQRDLCNSCGLRWAK	442;988	554;1019	9.4e-14;3.3e-10	1	CANCHTRVTPEWRRGPSGQRDLCNSC	Type IVb
148	EnsemblFungi	Ascomycota	Dothideomycetes	Mycosphaerellales	Sphaerulina musiva SO2202	Smus2	EMF09592	MMASTSAATTNNKPFSPRMANLLHREPSPQELEAARQLVEHSLSSTASQPQPHVPELHKSPTQHQYQHQHQHQHSTPSVSHGYRDATEYPNAHAQIVQGSSTAPLTSAPIMQPSRTSPSAMNGMTTPGAQMCSNCGTTKTPLWRRSPAGAVICNACGLYYKARNQMRPVGLKRGANSNQAAGGPNSERGTSPSSVQGGATYVPADQSVQGTCPGGGRCNGTGGQDACAGCPAYNNRVSKTTQVPYRQSSSERGDSSSAQSGSRHMHTVVQNYVSPSQQSQQQNSVVVACQNCGTTITPLWRRDENGHTICNACGLYHKLHGAHRPVQMKKAEIKRRKRVVPAAMGNQHHPGSPFPSDNMSDTSGHSDRGGLNTPLQQPESSPFIHTTSHVSGPIPVDFT…	489	52.9759	9.052	49.35	-0.891	0(N)	Nucleus	2	PF00320;PF00320	GATA zinc finger;GATA zinc finger	CSNCGTTKTPLWRRSPAGAVICNACGLYYKARNQ;CQNCGTTITPLWRRDENGHTICNACGLYHKLHG	132;289	165;321	1e-12;1.7e-11	2	CSNCGTTKTPLWRRSPAGAVICNAC;CQNCGTTITPLWRRDENGHTICNAC	Type IVa;Type IVa
149	EnsemblFungi	Ascomycota	Dothideomycetes	Mycosphaerellales	Sphaerulina musiva SO2202	Smus3	EMF14717	MSIYQHGHAVNMGMMNPDASGLTSSNGLDMDISLPMDLDLDLSGNGDQAFNLMSASTAPASASNSNAIASNGNGDYTPQGQQQQQQQQDGNAPAGGAGAGPLPTGFGMPPQTNQSTLTEFTKRRNWSQRIIEELKDFLHILTPDGRILYVSPSCKTITGYEPHTLIGKFIGEYVHPDDSGIFMREFNESIASGNALRFFYRFKKDNGTYMIFECDGHPHISPEPAGAGNFAHQSENNQNMHVAGMCRGFFMMARPYPTKNAALLDSFLEHKIENERLMRRIKELREEEKEETAEQDRMFREQTFQAGATPSHSGMGGSREPESGSEVPANDTPNYQGMPPPAKPSISNTQLTRQNLDSALSAQKPDSIADKMSRYEANNTHLESIELLTGLRYRDGERS…	527	57.5756	5.797	55.65	-0.746	0(N)	Nucleus	2	PF08447;PF00320	PAS fold;GATA zinc finger	ILYVSPSCKTITGYEPHTLIGKFIGEYVHPDDSGIFMREFNESIASGNALRFFYRFKKDNGTYMIFECDGHPH;CADCGTLDSPEWRKGPKGPKTLCNACGLRWAKKEKK	147;444	219;479	2.1e-10;2.7e-11	1	CADCGTLDSPEWRKGPKGPKTLCNAC	Type IVb
150	EnsemblFungi	Ascomycota	Dothideomycetes	Mycosphaerellales	Sphaerulina musiva SO2202	Smus4	EMF14934	MSQSQGQSAPAATAGYGNQNGSAPPICANCQTSTTPLWRRDESGSVLCNACGLFLKLHGRPRPISLKTDVIKSRNRVKASQAKKRDSQGADATALPHLGNGYSAGHAEVAHLQHAAPPGHQHSLPMGSAMHEQQHARAASPNPIARSQTPVLHQQHTNIAPQHIFDTVSLPSDTFASPSIPHFPLRQPSPSQANAQSSNGHHTSQSSTQQQQQQQQHQDVLAQNETLRTRVSELEVINDLFRGRVSELEHNEQEYRQRENAREEEAQRLTAALAAALARAADLQRVVDEMQQQHLSNGGDKAGAEEEQTAEEGPARKKARIGSDSGADSISKVDSVQGAAQ	341	36.7358	6.811	62.84	-0.839	0(N)	Nucleus	2	PF00320;PF25026	GATA zinc finger;Asd-4-like domain	CANCQTSTTPLWRRDESGSVLCNACGLFLKLHGR;QQHQDVLAQNETLRTRVSELEVINDLFRGRVSELEHNEQEYRQRENAREEEAQRLTAALAAALARAADLQRVVDEMQQQ	27;215	60;293	2.1e-12;3.3e-22	1	CANCQTSTTPLWRRDESGSVLCNAC	Type IVa
151	EnsemblFungi	Ascomycota	Dothideomycetes	Mycosphaerellales	Sphaerulina musiva SO2202	Smus5	EMF16568	MSSRSGTLSDERGDDLESLDGSSIGDHHHHHHAASSPRHVNPPHHHHHHHDDDAASAATATAAASTAISGSGTSSAIASLTSQSTLDTLSTRLDLSPSDRDAHKGLLRDTFFDHFRDDSVPSVTSPSDLETPEEMQKNDPLGTQIWKLYHKTKGQLPNSERLENLSWRMMSMNLRRKQLERQGLMPRPLPVSQNAPSGIAQLRKSSEQNAQHAHQVLGDDHMNLDDFLEPTSIGSPAGVSPSPTPSGSMPDGDPSSTVAVSAIPIKQQQRLQADELSAARASAPSVPPLEQNRTSKEFAYVQRHVRKTSIDERRVCAPPPKRRAEASPQVPPVQNSAIAAQNPAEEAALHDYCLDTPVTTQSSTQHPLLPFNLDTFNLDSDPILNSAGPLQQNFSFSPV…	957	102.717	6.499	54.91	-0.736	0(N)	Nucleus	2	PF08550;PF00320	Nitrogen regulatory protein areA, GATA-like domain;GATA zinc finger	IWKLYHKTKGQLPNSERLENLSWRMMSM;CTNCFTQTTPLWRRNPEGHPLCNACGLFLKLHGV	145;714	172;747	8e-10;7.5e-13	1	CTNCFTQTTPLWRRNPEGHPLCNAC	Type IVa
152	EnsemblFungi	Ascomycota	Dothideomycetes	Mycosphaerellales	Sphaerulina musiva SO2202	Smus6	EMF17616	MEPPSMAASSTYSGTANNYSHHSQYRPEPTRQSSYPPPDSARPPPASYALPAETKSTHSQNPPASSRPLPPSAAFSRAEDASPSYEQQYSANVANSSTSTGRPSSLPYGYTPFPPRYANATPPTGNSSGPIYQPSTTYGPPHNSQPGWKSESSRYDDRGLIHHSDSVKRHLDYFDLEASLNEISSTSGILSDFSRRYGDRMHHTQRSGASLNTLPGLVELDDMINKSRAAHDSLMKIRDVVLQQQAVYEQQAADQRQQHKLYDQHSQSGPDIHQQQEADEGKVGGFAGNDTKKRRGRAAPPGRCHSCNRAETPEWRRGPDGARTLCNACGLHYAKLTRKNNGTNKNANTGSSNLRPK	357	39.1181	9.13	43.05	-1.122	0(N)	Nucleus	1	PF00320	GATA zinc finger	CHSCNRAETPEWRRGPDGARTLCNACGLHYAKL	304	336	1.2e-10	1	CHSCNRAETPEWRRGPDGARTLCNAC	Type IVb
153	EnsemblFungi	Ascomycota	Dothideomycetes	Mycosphaerellales	Teratosphaeria nubilosa str. CBS 116005	Tnub1	KAF2765200	MSGPTLLAGAVPGDEDAHHSHSLFHPNTAGNSNGFGSGTGGAEGDLGITAPGTVDGLELDGLLADSGLDIDMNLPMDLDMDMDGQVGGDPSGFAPLAAQANTSLHETGAIAGEQDRTGPNQDTASNELVTNSAPPPESNSNGAGAGPLPTGFGMGAPNNSSTLTEFTKRRNWSQRIIEELKDFLHILTPDGRILYVSPSCNAITGYEPHQLIGKFMGEFVHPDDSGIFMREFNESIASGNALRFFYRFKKDDGTYMIFECDGHPHISHEQAPNGSPMKGLCRGFFMMARPYPTKNAALLDSFLEHKIENERLIKRIEDLKREEAEETAEQDRLLEQASASRTGATPSESQGLSGSQAPGNGASEQDYQGMPPPAKPSISNTALTRQNLDSALSAQRPDS…	561	59.5344	5.039	61.02	-0.641	0(N)	Nucleus	2	PF08447;PF00320	PAS fold;GATA zinc finger	ILYVSPSCNAITGYEPHQLIGKFMGEFVHPDDSGIFMREFNESIASGNALRFFYRFKKDDGTYMIFECDGHPHI;CADCGTLDSPEWRKGPKGPKTLCNACGLRWAKKEKK	193;476	266;511	1.3e-10;3e-11	1	CADCGTLDSPEWRKGPKGPKTLCNAC	Type IVb
154	EnsemblFungi	Ascomycota	Dothideomycetes	Mycosphaerellales	Teratosphaeria nubilosa str. CBS 116005	Tnub2	KAF2770324	MSYLGRRGVREARMEDYGDAGVDMRAAAHSDEATEAGIDFDGGLDTATSNTTSSPRHVRFPPGHFTSNSGSSSAIQSLTSASTLSTLESKLDLSPSEATVRKEFLQESFFDSRKEDATAAATEATSPEEMQKNDPLGAQMWKLYHKTKGQLPNSERLENLAWRMMSMNLRRKELERQQQEAAARRNAGQNPPSGIAQLRKTSEQAAQKSKDDNMNLDDFIVPSSIGTPAGVSPAPSGYSAADGGVPSTTSTMSAIPIKQHQRIQAEELSLARASAPSVPPLEQSRANHEFNYVQRHVRKTSIDERRPNKRRAEASPQVPPVNNSAMISHDPADEAALHDYALDHPTPTVHPQAQHPPLPFNLNTFDLENDATCNDPILNSAGPMQQQFTFSPVGSPLFN…	958	102.96	6.399	47.65	-0.784	0(N)	Nucleus	2	PF08550;PF00320	Nitrogen regulatory protein areA, GATA-like domain;GATA zinc finger	MWKLYHKTKGQLPNSERLENLAWRMMSM;CTNCFTQTTPLWRRNPEGHPLCNACGLFLKLHGV	140;704	167;737	4.2e-09;7.5e-13	1	CTNCFTQTTPLWRRNPEGHPLCNAC	Type IVa
155	EnsemblFungi	Ascomycota	Dothideomycetes	Mycosphaerellales	Teratosphaeria nubilosa str. CBS 116005	Tnub3	KAF2772193	MNPPQYAPAATAGGTQNGPPVCQNCGTSTTPLWRRDEQGSVLCNACGLFLKLHGRPRPISLKTDVIKSRNRVKTAPPKKRNSDGLPVPYAPHGVPHPVQNGISGGLPAAHPDVAHGGLHPHQQHHPPPPPGAPDGLERVNSHGSISRSNTPGLSQHNPNIAPQHIFDTVSLPQDTFASPTISFAQRQPSPSALSLNGTGSSNHLAASQDYEQLHSQVANLRTRVSELEVINDLFRGRVGELEMNEKEARRQVGLKGEENKRLRADLETANARYAELERRLAEAEGRSPKRARLCDGETAVDHVAESREQEQALPALSPDPARGSSNFMMP	330	35.5993	8.625	66.88	-0.755	0(N)	Nucleus	2	PF00320;PF25026	GATA zinc finger;Asd-4-like domain	CQNCGTSTTPLWRRDEQGSVLCNACGLFLKLHGR;QDYEQLHSQVANLRTRVSELEVINDLFRGRVGELEMNEKEARRQVGLKGEENKRLRADLETANARYAELERRLAEAEG	22;208	55;285	1.2e-12;6.800000000000001e-22	1	CQNCGTSTTPLWRRDEQGSVLCNAC	Type IVa
156	EnsemblFungi	Ascomycota	Dothideomycetes	Mycosphaerellales	Teratosphaeria nubilosa str. CBS 116005	Tnub4	KAF2772787	MATKYHEPAGTMASTSLPDRPAQVQRHLSQQELEAAQHLLDHSQSHCPPTQRVPPDATISHHNGRSRASVEAAPQHHDLGDIPQQYSQHYSPAPAGQHAPLQQARASPASSLPTTGQQCSNCGTTKTPLWRRSPTGAVICNACGLYYKARNQMRPVGLKRGSAASSSHHGASSQDRGTSPTSLQGNATYIAADQSVNGTCPGGGRCNGTGGHEGCNGCPAYNNRISKTAQIALQQPTAGSSQHTAYMTNGSPVAGTSMVVACQNCGTTITPLWRRDDQGHTICNACGLYYKLHGVHRPVQMKKAEIKRRKRVVPADMQGNDDDTSTTMSDPRNSVAPSVMSSQDMSPRPMSGGPIPVDFTEAFRLHSIRQINSSGLEASQEENLSPAPHPRKRSFDTSE…	481	51.7347	8.383	52.47	-0.801	0(N)	Nucleus	2	PF00320;PF00320	GATA zinc finger;GATA zinc finger	CSNCGTTKTPLWRRSPTGAVICNACGLYYKARNQ;CQNCGTTITPLWRRDDQGHTICNACGLYYKLHGV	119;262	152;295	1.3e-12;8.6e-13	2	CSNCGTTKTPLWRRSPTGAVICNAC;CQNCGTTITPLWRRDDQGHTICNAC	Type IVa;Type IVa
157	EnsemblFungi	Ascomycota	Dothideomycetes	Mycosphaerellales	Teratosphaeria nubilosa str. CBS 116005	Tnub5	KAF2774060	MNGYSSYGYGANGHGIDPSYAAGDTMMMGTDPATGQSLEDIVSQNAKAIRRQSMPQGYGASPAQVDADMRRISMLDYSGTSPATSVNGFAYDPTGSMDQNGMMAGASPAQQMSQPRRGQEMRQSSHGNLGVTSNYNGTPQSYTPMMPPNSAYASPAHPQNGMDLGINSPYADPNMGMSMDFSMDPNMSTALVNDMNMSMYSQPQFSSATVASPMHSTAHQAQSAQSIAPPHPPLNHSNSNSGMNTQYSTQSSQSGGSTVRALSRSNTMPDVGSTSSPLHPQGSSGRQPGPTAQTAGGAGGPGFHARNQSLQIGTSRLDHGGSWPQGQQQSRNTQQQYDGVSGPVPIDTSTYNPNNQGFNWEAPEGGWPSTMVGRPHSMQLQHKNAYSSTGFDMLGVLMR…	1092	117.859	8.822	60.86	-0.601	0(N)	Nucleus	3	PF13426;PF08447;PF00320	PAS domain;PAS fold;GATA zinc finger	CAFVVCDAEKDDIPIVYCSDNFERLTGYNKHMILGRNCRFLQSPDGNVAPGIRRKYVDDDSVLYLKNMIALRREAQISLINYRRGGQPFMNLLTMIPITWDSDNVKFFVGFQVDL;VSPSAIRVLEYEPHEIIGTALSSVCHPSDIVPVTRELKDTSSGASVNVVFRIRRKNSGYMWFEGHGSLHTEQGK;CANCHTKVTPEWRRGPSGQRDLCNSCGLRWAK	417;626;969	531;699;1000	1.5e-13;2e-06;2.8e-10	1	CANCHTKVTPEWRRGPSGQRDLCNSC	Type IVb
158	EnsemblFungi	Ascomycota	Dothideomycetes	Mycosphaerellales	Teratosphaeria nubilosa str. CBS 116005	Tnub6	KAF2774146	MDGESRRPQLPALSYLDVDKVKREEEAAYQRRNSGAANTLPPVTAASPTYPYPSVPPPPYSQPTPSSFRSNAWGSAQTGVQTPPESRRASGEKQESKQTTRQSLPSISEALGVDSQTYPTATPAPPAHTASAHAHQSQAPSGPPRSPASATKRSFTMEPPPPPQTYQSFPHAQQEPHPHTYLPQEAHRTPYAPERPPLHLPASESAARPTQPASTYPYPPTAPAGYDQPPAHPAGPMPPPSSVPYGFIPYAARYSQPPPPVSGTSGPIYQPSAHYPATPAPGWKAEAARYGPDDATDSRDYSTSVKRHLDMYDLEGSLNEIAQTSGILLDFSRRYGDRLHQSARSGPSLATLPGLVEVEDMISKSRVQLESLEKIRAVVLEQQAAYEQSIVDQRQAHKG…	492	53.2972	8.666	48.58	-0.964	0(N)	Nucleus	1	PF00320	GATA zinc finger	CHSCNRAETPEWRRGPDGARTLCNACGLHYAKL	437	469	1.8e-10	1	CHSCNRAETPEWRRGPDGARTLCNAC	Type IVb
159	EnsemblFungi	Ascomycota	Dothideomycetes	Myriangiales	Sphaceloma murrayae str. CQ-2017a	Smur1	PNS14831	MTAPIQYGATSPLNVTASNSNNYYDSSDIPSGPQSLTSASTLDSSKLDSPSTDTARRLLRDHEPFFRTDADAARDEDIREMQKEDPLGTQIWKLYSKNKLQLPNAERMENLTWRMMSMNLRRKQLAEQGFAAKRASNSPSGIAQLRQSSAAINRPQPTSDPMNLDEFIDPSATTSPSDHVSRSSSHEALTSTATTASAIPIKKQKEIQSQDPHISRASAPSVPPTARTQNKEFGYVQRHLRKTSIDERRPPKRRAEASPQVPALNNIAGRPDLSNDPSLHNYSLNAPQSYPHHQHHQSHNSFQIPYDLDTSYNFDNDPIINSADPLQQQFTFSPVGSPMINGGPYTSMFSQPTTLSQQMPSNSMYSSPNSAYPSTVSTPQPLADSEGFFGSSSGLDLRQ…	899	95.0219	8.667	50.57	-0.778	0(N)	Nucleus	2	PF08550;PF00320	Nitrogen regulatory protein areA, GATA-like domain;GATA zinc finger	IWKLYSKNKLQLPNAERMENLTWRMMSM;CTNCFTQTTPLWRRNPEGQPLCNACGLFLKLHGV	91;642	118;675	2.5e-08;3.1e-13	1	CTNCFTQTTPLWRRNPEGQPLCNAC	Type IVa
160	EnsemblFungi	Ascomycota	Dothideomycetes	Myriangiales	Sphaceloma murrayae str. CQ-2017a	Smur2	PNS15167	MDPLSDMATAQNMAGAMTMPDMLNDGTDLMAGLDGDMMPMDLDFDTNLTDANFDQIAGMGPPLQHQGSNETQNTEVFMSQEDGNHATGVGAGPLPTGFGMGPPATNSTLTDFTKRRNWSQRVIEELKDFLHILTPDGRILYVSPSCKSITGYEPGDLIGKFMGDFVHPDDSGIFMREFNESIASANALRFFYRFKKDDGTYVIFECDGHPHISSETPTIGFNGMSLSQQQAMAPSTGFCRGFFMMARPYPTKNAALLDSFLEHKIENERLMKRIEELKREEQEENEQQERQWQAQSASQQNASTPMSEGHGLTSTNPDAGRTPNYQGMPPPAKPPISNTALTRQNLDSALSSQRPDSIADKMSRYEGSNHLETIEMLTGLRYRDGERSHGISTGDTSPA…	507	55.2481	5.127	55.72	-0.7	0(N)	Nucleus	2	PF08447;PF00320	PAS fold;GATA zinc finger	ILYVSPSCKSITGYEPGDLIGKFMGDFVHPDDSGIFMREFNESIASANALRFFYRFKKDDGTYVIFECDGHPHISS;CADCGTLDSPEWRKGPKGPKTLCNACGLRWAKKEKK	139;433	214;468	6.7e-11;2.6e-11	1	CADCGTLDSPEWRKGPKGPKTLCNAC	Type IVb
161	EnsemblFungi	Ascomycota	Dothideomycetes	Myriangiales	Sphaceloma murrayae str. CQ-2017a	Smur3	PNS16651	MGPNVLNAPYPTGPPPPYSATIQHPNPTPTATPHAHTPDLSSKRQDTQEVSVKHSLPSLHEALGVDRHAAFTSEAPHSSATQTAHPTPSTHSPQSPRRYQTGPSPPHRPQAFAPVQPPFSQPDHGNTRPAVAEPQEYRRPEYSESYRTYQRRSPPPPSQIHRGSYPGPEAIRTYEPTSQGPPPPPASQFTYGYAHSSGPFTSGPSAAPISAPVYHPSTAPQSSPESTHSWRSGPTSGPAVRPSQAYSDSIKRHLDSYDFELALNEIAEYSTVTLDFSRQYGARLHNSQRSGITPGTLPAITEIDDLMNKNRHTMEALSRLRESLVAHQTAYFQQAQENLRLNQDSKRNDSVHTQGDDSKTGGFAGGEPKKRRGRNAAPGRCHSCNRAETPEWRRGPDGA…	441	47.923	9.31	45.94	-0.998	0(N)	Nucleus	1	PF00320	GATA zinc finger	CHSCNRAETPEWRRGPDGARTLCNACGLHYAKL	381	413	1.6e-10	1	CHSCNRAETPEWRRGPDGARTLCNAC	Type IVb
162	EnsemblFungi	Ascomycota	Dothideomycetes	Myriangiales	Sphaceloma murrayae str. CQ-2017a	Smur4	PNS16996	MSYAAAAPAATAGGTQNGPPSCQNCGTSTTPLWRRDEAGSVLCNACGLFLKLHGRPRPISLKTDVIKSRNRVKTSGPKKKPSLENTTGLPASYPGERRVASGSTDRSNSPPHAGEAVGLGTNIAPQHIFDHVSLAESAFNSPALPGFTLRHPSPSVSSMNGHLDQTNGGYQDMHSASNGAHLKTRVSELEVINDLFRGRVAELESSEQEARRSESMAREETSRVKRDLEAALGREEVLKRRVEELEARINGDGEGTRKRTRLSDASELDDAPQE	274	29.4473	7.755	64.89	-0.742	0(N)	Nucleus	2	PF00320;PF25026	GATA zinc finger;Asd-4-like domain	CQNCGTSTTPLWRRDEAGSVLCNACGLFLKLHGR;ASNGAHLKTRVSELEVINDLFRGRVAELESSEQEARRSESMAREETSRVKRDLEAALGREEVLKRRVEELEAR	22;176	55;248	1.5e-12;1.8e-23	1	CQNCGTSTTPLWRRDEAGSVLCNAC	Type IVa
163	EnsemblFungi	Ascomycota	Dothideomycetes	Myriangiales	Sphaceloma murrayae str. CQ-2017a	Smur5	PNS18862	MATVHESPSRPKSANHPPPSNPQREPSKEDIELAEQLVNHAKGIQSNVRDTPNSVHPSPPRSSASPTTSGEVHLHSYAPATDSQVAMDSTNSQTRRSGPSAITSGQICSNCGTTRTPLWRRSPTGDTICNACGLYLKARNQMRPVGMRRQLQQPQYDAMSTAAGQDGPNSDGPRQAGSNAAYGPADNTVAGTCPGGGRCNGTGGHDGCNGCPAYNNRVAKTAQFALAQTGEGTPGPPSDTDGTSTRTESPYPHAQNMESQNSVNVVVACQNCGTTVTPLWRRDEEGHTICNACGLYHKLHGVHRPVQMKKSEIKRRKRVVPAMQDQNHAYQSSGIPQHTHSFQDSSHSQHTPTSNPTPSANRLAFDNLMNPAPDHPPYPSHNHAHASSYDHQRDEESAH…	529	57.3802	7.397	47.49	-0.985	0(N)	Nucleus	2	PF00320;PF00320	GATA zinc finger;GATA zinc finger	CSNCGTTRTPLWRRSPTGDTICNACGLYLKARNQ;CQNCGTTVTPLWRRDEEGHTICNACGLYHKLHGV	108;269	141;302	1.3e-10;4.2e-12	2	CSNCGTTRTPLWRRSPTGDTICNAC;CQNCGTTVTPLWRRDEEGHTICNAC	Type IVa;Type IVa
164	EnsemblFungi	Ascomycota	Dothideomycetes	Myriangiales	Sphaceloma murrayae str. CQ-2017a	Smur6	PNS21825	MSNYDPFQFDDSDVQNMSHNRPNSMINNVNGMNSPAMMQGQSLDDIVDQNAKMMRRQSMPQSFHRRNTGDMSNMQNMMEFSSGTPAGPLENFHFDPATSLEQDNSGNLVPRIQQPTRSALKKQQSGPNLSGMGSPYNPQLNSAYSSLYQSPAHGGGNVDMDINSPYVNQPMGLQMDFSDSGLTPMNSTGANQMSMYSNPSPYQTSMMNSPMNVASMTSSIHGPSQNDPGGGGNSTHDGRRSTYGGNSIRRNSMESSQQRLQSRSQSIPMPTQPPRSQYSQTSHPSQQSAHSQPSPAHVIAQHEHNPQFTAQPQNPKRGSQQDKGMGDRSMSSLPDNFDPSKHNPNNQNFPWEVPEGGWPSTMINRPHMQSVYKNAYSSTGFDMLGVLMRVATRPKPEIN…	1086	119.388	8.919	59.99	-0.727	0(N)	Nucleus	3	PF13426;PF08447;PF00320	PAS domain;PAS fold;GATA zinc finger	FVVCDAEKDDFPIIYCSDNFERLTGYTRHMILGRNCRFLQSPDGNVAPGIKRKYVDDDSVLYLKNMINARREAQISLINYRRGGQPFMNLLTMIPINWDTDQVKFFVGFQVDL;VSPSALRVLEYEPGELIGTALSSVCHPSDIVPVTRELKDTSTGAAVNVVFRIRRKNSGYMWFEGHGSLHTEQGK;CANCHTRVTPEWRRGPSGQRDLCNSCGLRWAK	409;615;955	521;688;986	8.9e-14;7.3e-07;3.2e-10	1	CANCHTRVTPEWRRGPSGQRDLCNSC	Type IVb
165	EnsemblFungi	Ascomycota	Dothideomycetes	Mytilinidiales	Lepidopterella palustris CBS 459.81	Lpal1	OCK75051	MDLSQIDPDNQSQPAQPFSTQITAHQQLQQPVSGPVDPNDAFSVIQNSSISGAGAGPLPTGFGVQSMNTTGSTLTEFTKRRNWSQRVLEELRDFLHILTPDGRILYVSPSCKCLTGFEPSQLVGRFISDFIHPDDSGIFVREFNESIASGNPLRFFYRFRKDDGTWAIFESHGHPHLSSEAAAFGPNNGATFCRGFFMMARPYPTKNAALLDSFLEHKIENERLTKRIAELKREEQEEQEAQERHWMKKAEGHTSVTPSETQRTDLRTDSGSISGARYNGTMPPPAKPGVSNTALTRKNLDEALAASKPDSINDKMARYEGATHLETIEMLTGLRYRDGERSHGISTGSESPLLIRGDVGIQISLDKDGRNSSDKKKKLKIADEYVCTDCGTLDSPEWR…	444	49.0612	6.875	62.03	-0.714	0(N)	Nucleus	2	PF08447;PF00320	PAS fold;GATA zinc finger	ILYVSPSCKCLTGFEPSQLVGRFISDFIHPDDSGIFVREFNESIASGNPLRFFYRFRKDDGTWAIFESHGHPHL;CTDCGTLDSPEWRKGPNGPKTLCNACGLRWAKKEKK	104;387	177;422	6.4e-10;1.4e-11	1	CTDCGTLDSPEWRKGPNGPKTLCNAC	Type IVb
166	EnsemblFungi	Ascomycota	Dothideomycetes	Mytilinidiales	Lepidopterella palustris CBS 459.81	Lpal2	OCK82370	MTYATSAPATSGGQGNSPPVCQNCTTSTTPLWRRDESGSVLCNACGLFLKLHGRPRPISLKTDVIKSRNRVKTTGQGPRKKNSTDGNGLPAAHPDADPTLSALTQHRRASHKISSATSDRSNSPISRTGTPLLQHPSNIAPQHMFDGAIHGDPFHSPSLPSFILRQPSPGSTSSVNGSHLEPPLSYDALMAQNTSLKTRVSELEVINDLFRGRVAELEHSEQEARKAEMASRETEANLRADLEDVRQGEADLKRRLEELETEGPRHKKMRLSDIVDESRASTPLSSTAEQSG	292	31.6528	8.371	65.89	-0.764	0(N)	Nucleus	2	PF00320;PF25026	GATA zinc finger;Asd-4-like domain	CQNCTTSTTPLWRRDESGSVLCNACGLFLKLHGR;SYDALMAQNTSLKTRVSELEVINDLFRGRVAELEHSEQEARKAEMASRETEANLRADLEDVRQGEADLKRRLEELETE	21;185	54;262	8.4e-12;1.6e-28	1	CQNCTTSTTPLWRRDESGSVLCNAC	Type IVa
167	EnsemblFungi	Ascomycota	Dothideomycetes	Mytilinidiales	Lepidopterella palustris CBS 459.81	Lpal3	OCK82548	METLDAGSRQSVGLPSINYLDSDKIKREEAEYQRKHSAAAMASPSYPFSCPPPPYTSYQSTSANSVSGALSGLISPPESRRTSGDEKEQRQPARQSLPSIHEALGSEQPLSYPAPPSSAPVSAPQLYQHSAATTSPSDQNRRPYQSDAQSQGPPNPYSHPHSPYMNPSQSATSAPPPPPPPPPPHSQPEALPRPPFPSSSHNPKLPTLHPLRTTQSPPTSATRPNLPYSFSGQPSSAYESTPHSAGSMNIPYGFSQQYPSQYPYSAPPPGAPGPVYPPSASYSAPARYPPPSWRSDGAEISRVEESKRAGRSSLAPYGESVKRHLDNFDLEASLNEISECSGRIFDFAKHYRQRAHETQRSGMTPGSIPSLNETDELMKLHARIGDCFVSIRNVVVNQQ…	512	55.1251	9.054	44.94	-0.948	0(N)	Nucleus	1	PF00320	GATA zinc finger	CHSCNRAETPEWRRGPDGARTLCNACGLHYAKL	452	484	1.9e-10	1	CHSCNRAETPEWRRGPDGARTLCNAC	Type IVb
168	EnsemblFungi	Ascomycota	Dothideomycetes	Mytilinidiales	Lepidopterella palustris CBS 459.81	Lpal4	OCK83690	MTTRLSAGGGASLAPTPTHPHQLSRQPSKEDLEMAENLNLLNHSQDRQTTRRDSNTRTDAVSPAGTDGPSTNSPGNATEISEYHSLDDTLSYQQRTSQSEKDSPQTATAAMQQRPQASNAPIIGQICSNCGTTRTPLWRRSPAGETICNACGLYWKARNQSRPTNLKRNVQPTVLTMQQGQNAGQAHDRCTSPSGFTGSPRATYVAADAVATGTCPGGGRCNGTGGQQGCNGCPAYNNRVSKTAQFALAQANQHAGTSPQASGDASGSNANDSMISPTGQSLGQNTASVIPACQNCGTTITPLWRRDESGHTICNACGLYYKLHGLHRPVAMKKQEIKRRKRVVPAAPDTTQQPAHFANFSPKNPPHSSVSPDPSTSLPDAPDPYSSSSTHPSSRHYGP…	566	60.0251	8.746	50.32	-0.823	0(N)	Nucleus	2	PF00320;PF00320	GATA zinc finger;GATA zinc finger	CSNCGTTRTPLWRRSPAGETICNACGLYWKARN;CQNCGTTITPLWRRDESGHTICNACGLYYKLHGL	127;293	159;326	2.9e-11;2.1e-12	2	CSNCGTTRTPLWRRSPAGETICNAC;CQNCGTTITPLWRRDESGHTICNAC	Type IVa;Type IVa
169	EnsemblFungi	Ascomycota	Dothideomycetes	Mytilinidiales	Lepidopterella palustris CBS 459.81	Lpal5	OCK84408	MNGYPSYQPRQFATDDRGNVLNMAVGHDGMNSYSMVGGQSLDDIVNQNTKAMRRRSMPMQYSSPPVTIEDHDVRRMSMMDFNGMQGGTLDNFQFDPAGSSNINRIMRNSASYPQPSQSRRPSASELALNTQFSNQNLPYTSIPPPGSTYTSPLHPNTSLDMDMTSPFEQNSLPMPLDVNDTGMTTVMGNDMNMFPQAQFASPMINSPETPGFTTSMQGLAQDSAGTNLQTRERFSSGSGNATPDKRSAMSSRTNSQEQQDVSSNSRPHSNPLSVQSSSNPMPTISTFAPGPPPETQPAIEPTTQTMFAWAAPPEGFPSTLPGSRPHMESQYKNAYSSTGFDMLGVLMRVATRPNPEINIGSVDLSCAFVVCDAQMDDDPIVYCSENFERLTGYNKHMIL…	1054	116	7.913	60.79	-0.655	0(N)	Nucleus	3	PF13426;PF08447;PF00320	PAS domain;PAS fold;GATA zinc finger	AFVVCDAQMDDDPIVYCSENFERLTGYNKHMILGRNCRFLQSPDGMVQAGVKRKYVDDDSVFYLKNMINMRREAQISLINYRRGGQPFMNLLTMIPITWDNTEDIKFFVGFQVDL;LYLSPSSRTVLEYEASELVGTALSSVCHPSDIVPVTRELKDTTSGVSVNVVFRIRRKHSGYMWFEGHGSLHTEQGK;CANCHTRVTPEWRRGPSGNRDLCNSCGLRWAKQN	367;573;928	481;648;961	1.7e-12;6.9e-06;1.8e-10	1	CANCHTRVTPEWRRGPSGNRDLCNSC	Type IVb
170	EnsemblFungi	Ascomycota	Dothideomycetes	Mytilinidiales	Lepidopterella palustris CBS 459.81	Lpal6	OCK84730	MSGAQYGERGGGLRASTLSDDFGAPAIGGLPDPQFFPTSSSPRHVRFPPGRFEGSSGSSSTLQSLTSASTLDSKLDFSPSETTARKGMLEDTIFPVWRNDAAGVNLDSPEEMQKNDPLATQIWKLYSKAKTQLPNAERMENLTWRMMAMSMKRLESDRKGQLRKNNNTTPTTGSSSAPSGIAQLRKSIDLQAQTHMQHSQSDAMNLDDFIFPSSVASPAGLSPSPSNEKAASSNAIAPAIPIRKTSQVSDQNLHISRASAPSVPPTITREHDFGYIQRHVRKTSIDERRPRKRPADCSPQVPAVNSIMIPNDPEAEAALNHYTLDQPMHPPGFQQHASQPQVPYAIDTFQLNEDPIISSAGPFQQQFTFSPVGSPLMNQGGPYSAMYNPNSMASSLNST…	926	98.9746	8.658	51.4	-0.733	0(N)	Nucleus	2	PF08550;PF00320	Nitrogen regulatory protein areA, GATA-like domain;GATA zinc finger	IWKLYSKAKTQLPNAERMENLTWRMMAM;CTNCFTQTTPLWRRNPEGHPLCNACGLFLKLHGV	122;693	149;726	1e-09;7.2e-13	1	CTNCFTQTTPLWRRNPEGHPLCNAC	Type IVa
171	EnsemblFungi	Ascomycota	Dothideomycetes	Mytilinidiales	Lophium mytilinum str. CBS 269.34	Lmyt1	KAF2492086	MSGGVSASGGASLAPALAHHPHRLSRQPSREDFEMAENLSMLNPQHHRPAGTSPQASTEAPSPENDAMSTTSQGAQTDISEYHSLEDTLAHRQPPQDPSSRHASPAAMQQRPQASNAPVNGQICSNCGTTRTPLWRRSPTGETICNACGLYWKARNQSRPTNLKRTVQPTTLAVQQTQATGQPHDRSNSPSCLTTSPRATYVAADQVATGTCPGGGRCNGTGGQQGCNGCPAYNNRVSKTAQFALAHASAQQNAPPTPGAGDAQASSAADSLSAPTGHSMGQNAASVVPACQNCGTTITPLWRRDELGHTICNACGLYHKLHGTHRPVAMKKQEIKRRKRVVPAPPDMAYSPSQAAQGTPRGFDSSVSPDPSASLPEPSEPYANPQASHTYGPLPVDFT…	536	56.5777	8.661	49.18	-0.796	0(N)	Nucleus	2	PF00320;PF00320	GATA zinc finger;GATA zinc finger	CSNCGTTRTPLWRRSPTGETICNACGLYWKARN;CQNCGTTITPLWRRDELGHTICNACGLYHKLHGT	124;291	156;324	3.6e-11;1.2e-10	2	CSNCGTTRTPLWRRSPTGETICNAC;CQNCGTTITPLWRRDELGHTICNAC	Type IVa;Type IVa
172	EnsemblFungi	Ascomycota	Dothideomycetes	Mytilinidiales	Lophium mytilinum str. CBS 269.34	Lmyt2	KAF2493863	MSGVGAGPLPTGFGAQNMNPSGSTLTEFTKRRNWSQRVLDELRDFLHILTPDGRIMYVSPSCKYITGYEPVQLVGRFMNELIHPDDSGIFVREFNESIASGNPLRFFYRFRKEDGSWIIFESHGHPHLSTDGTFAPNGPTLCRGFFMMARPYPTKNAALLDSFLEHKIENERLTKRIAELKREEQEEEEQQDRHWSKQMEGYSSVSQSETQRTDTESSAFNESKAMPPPAKPVALNTALTRQNLDEALSATKADSINDKMARYEGATHLETIEMLTGLRYRDGERSKGISTGDASPLLIRGDVGIQISLDKDQRGSLDKKKKMKIADEYVCTDCGTLDSPEWRKGPSGPKTLCNACGLRWAKKEKKRQGGNTSISLPANLPQQPSGNQSIHTNSNSNTT…	405	45.2311	7.12	61.95	-0.78	0(N)	Nucleus	2	PF08447;PF00320	PAS fold;GATA zinc finger	IMYVSPSCKYITGYEPVQLVGRFMNELIHPDDSGIFVREFNESIASGNPLRFFYRFRKEDGSWIIFESHGHPHLSTDG;CTDCGTLDSPEWRKGPSGPKTLCNACGLRWAKKEKK	55;331	132;366	3.1e-12;1.8e-11	1	CTDCGTLDSPEWRKGPSGPKTLCNAC	Type IVb
173	EnsemblFungi	Ascomycota	Dothideomycetes	Mytilinidiales	Lophium mytilinum str. CBS 269.34	Lmyt3	KAF2499233	MSGAQYAERGGALRPAQSDHFDAPADPVFFSTSSSPRLFRLPSGPFDNDSGDSSAVQSLTSASTLDSKLDFPPSDAAARQGMLADSFFPTWSNDAAGANLDNPEEMQKNDPLATQIWKLYSKAKTQLPNAERMENLTWRMMAMSMKRAELDRRGLSRSNSSFTPSAGSMSAPSGIAQLRKSVDQQAHAQAQQPQADAMNLDDFIFPSSVASPAGLSPSPSNERTASSNTTAPGIPIRKTSQMADQNHHLARASAPSVPPTISREHDFGYIQRHVRKTSIDERRPRKRPAENSPQVPAVNSIMIPNEPEADAALHHYTLDQPMHPPTFQHHGSQPQVPYSIDTFQLQDDPIISSAGPFQQQFTFSPVGSPMMAQGGPYSAMYNPNSMGSSLNSADYYSPP…	917	97.5528	7.791	48	-0.735	0(N)	Nucleus	2	PF08550;PF00320	Nitrogen regulatory protein areA, GATA-like domain;GATA zinc finger	IWKLYSKAKTQLPNAERMENLTWRMMAM;CTNCFTQTTPLWRRNPEGHPLCNACGLFLKLHGV	116;687	143;720	1e-09;7.1e-13	1	CTNCFTQTTPLWRRNPEGHPLCNAC	Type IVa
174	EnsemblFungi	Ascomycota	Dothideomycetes	Mytilinidiales	Lophium mytilinum str. CBS 269.34	Lmyt4	KAF2500535	MNGYPSYPPGHYGTANGGNMDMTGIQGEVIPYDFGGGQSLDDIVNQNAKELRRRSMPVHYSNNVSMDGQDHRRLSMMDFKGMQGGVLDNYNFESPTTSNMDGIVRNGMPYPQQSNNAQTRRPSGGDLALNTQFSHQQGWITTMAPPASPYTSPLHTAGPMDSELHSRYGPGPGLAIPLENDPMMNNDINLYSQPQFASPMVTSPVSPDFGPTPRGLPRENSNSTIQTNDHFGPESGNGTPDVQSSMPSRPGSQEQGFRSNSQPESDPSSARNSANQIPTVSSFRPEPSRHLEKSLPPNNGLKFPWRAPTDGFPSTMGGRPHVEHAQYKNAYSSTGFNMLEVLTRVATRPNPEINIGNVDFSCAFVVCDAQKDDVPIVFCSDNFERLTGYTKHMILGRNC…	1047	114.799	8.115	61.75	-0.665	0(N)	Nucleus	3	PF13426;PF08447;PF00320	PAS domain;PAS fold;GATA zinc finger	AFVVCDAQKDDVPIVFCSDNFERLTGYTKHMILGRNCRFLQSPDGYVEAGIKRKYVDDDSVLYLKNMINMRKEAQISLINYRRGGQPFMNLLTMIPITMAESDEIKYYVGFQVDL;LYLSPSCQKVLEYDPTELNGSALSSVCHPSDIVPVTRELKDTSSGASVNVVFRILRKRNGYMWFEGHGSLHTEQGK;CANCHTRVTPEWRRGPSGNRDLCNSCGLRWAKQN	363;569;922	477;644;955	1.2e-12;4.8e-06;1.8e-10	1	CANCHTRVTPEWRRGPSGNRDLCNSC	Type IVb
175	EnsemblFungi	Ascomycota	Dothideomycetes	Mytilinidiales	Lophium mytilinum str. CBS 269.34	Lmyt5	KAF2501739	MEPMWVAQHPPTSAGGVPDDESSDARHGPNSLPSYSAEYASTGSFTEISDLADRRRVQNRIAQRNYRKKLKERLEGFERRSGSSSEPFVLYEHPPSCSPGLADNPQPKVLLSESNPILSLEMGPALPGGTEQGDQNDVPTTCTNCFTQITPLWRQNAEGRPLCNACGLFLKLHGVVRPLSLKTDVIKKRNRGSGNTVPVGTASSRKHSLGPEPRLAPSTSSPSNFPPNNPADHNPPCNTLYVGNLPIDTPEDLLKSLFSREPGYKRLCFRTKQNGPMCSVEFEDVVSATKSLNHLYAYPLPNSTKGGIRLTFSKNPLGVRSDQRTDGSTLFRQPEALPASLSSVESALKAEWWPTPDTSLHGWEKMPQDKDPKIENERNQNSSLKPNTTPDWVQFPFVP…	1117	123.713	6.336	69.67	-0.635	2(o1063-1085i1092-1114o)	Endoplasmic reticulum	1	PF00320	GATA zinc finger	CTNCFTQITPLWRQNAEGRPLCNACGLFLKLHGV	142	175	3.8e-10	1	CTNCFTQITPLWRQNAEGRPLCNAC	Type IVa
176	EnsemblFungi	Ascomycota	Dothideomycetes	Mytilinidiales	Lophium mytilinum str. CBS 269.34	Lmyt6	KAF2502394	METLDAGSRQSVGLPSINYLESDKIKRDEPGFQRKHSAAAMASPSYPFPGPPPPYSNHQSTGASSTGALSGLISPPESRRTSSENEKEQRQSARQSLPSIHEALGDGQPLSYPAPPPSAPVSAPQHYQPSPATSGADVRPRTYSSDLQSQGPSNPYAHPRSPYTTPAPPSTSGPPPPPPPQVESLPRPPFSSSSHNPKLPTLHPLRTQSPPINASRPSVPYSPYSQQAPPSTYEPAPSSAGPMNPPYGGYNQYSQHYGPYSAPTPGAPGPVYPPGAPYSAQARYPPPSWRNDDMSRVEENKRAGRTGPPPYGDSVKRHLDTFDFEASLNEMLDGGNRVMHFTKHYMDRSHENQRSGIQPGSIPGLNEVDELMKHTQRIQDSLGRIRDVVVSQQTALAEQ…	504	54.2502	9.253	42.88	-1.028	0(N)	Nucleus	1	PF00320	GATA zinc finger	CHSCNRAETPEWRRGPDGARTLCNACGLHYAKL	445	477	1.9e-10	1	CHSCNRAETPEWRRGPDGARTLCNAC	Type IVb
177	EnsemblFungi	Ascomycota	Dothideomycetes	Mytilinidiales	Lophium mytilinum str. CBS 269.34	Lmyt7	KAF2502994	MTYATSAPATSGGQANSPPVCQNCTTSTTPLWRRDETGSVLCNACGLFLKLHGRPRPISLKTDVIKSRNRVKTAGQGPRKNKSTDANGLPAAHPDADPLSALTQHRRQSQKISSGTSERSNSPISRTGTPGLQHPSNIAPQHMFDGVIHGDVYHSPSLPSFHIRQPSPGSTSSVNGSHLEPPLSYEALAAQNTSLKTRVSELEVINGLFRGRVNELEQSEQNARDNENLARDTEAHLRAELEDTRQREAELKRKLDDLETEGPRHKKIRLNDIIDESRASTPFSSTAE	288	31.4464	8.694	66.46	-0.843	0(N)	Nucleus	2	PF00320;PF25026	GATA zinc finger;Asd-4-like domain	CQNCTTSTTPLWRRDETGSVLCNACGLFLKLHGR;SYEALAAQNTSLKTRVSELEVINGLFRGRVNELEQSEQNARDNENLARDTEAHLRAELEDTRQREAELKRKLDDLETE	21;184	54;261	1.8e-11;3.1e-28	1	CQNCTTSTTPLWRRDETGSVLCNAC	Type IVa
178	EnsemblFungi	Ascomycota	Dothideomycetes	Mytilinidiales	Mytilinidion resinicola str. CBS 304.34	Mres1	KAF2808325	MDLSQIDPDSQSQPVPSYSAPITSQQQQQQQQQQLQQPIGSRVEANDAYAMQNTMSGVGAGPLPTGFGAQNMNPSGSMLTEFTKRRNWSQRVLDELRDFLHILTPDGRIMYVSPSCKDITGYEPVQLVGRFVNELIHPDDSGIFVREFNESIASGNPLRFFYRFRKEDGSWIIFESHGHPHLSTDSTFTPSGPTLCRGFFMMARPYPTKNAALLDSFLEHKIENERLTKRVAELKREEQEEEEQQERHWSRRTEGYSSVSQSETQRTDAESSSLNESKAMPPPAKPVALNTALTRQNLDEALSATKADSINDKMARYEGATHLETIEMLTGLRYRDGERSQGISTGDASPLLIRGDVGIQISLDKDQRGSLDKKKKLKIADEYVCTDCGTLDSPEWRKG…	459	51.3034	5.939	62.09	-0.849	0(N)	Nucleus	2	PF08447;PF00320	PAS fold;GATA zinc finger	IMYVSPSCKDITGYEPVQLVGRFVNELIHPDDSGIFVREFNESIASGNPLRFFYRFRKEDGSWIIFESHGHPHLST;CTDCGTLDSPEWRKGPNGPKTLCNACGLRWAKKEKK	109;385	184;420	1.2e-12;1.4e-11	1	CTDCGTLDSPEWRKGPNGPKTLCNAC	Type IVb
179	EnsemblFungi	Ascomycota	Dothideomycetes	Mytilinidiales	Mytilinidion resinicola str. CBS 304.34	Mres2	KAF2810198	MSGAQYAERGGALRAAQTNHFDAPADPVFFPTSSSPRHFRVPSGHFDHDSGSSKLDFSPSDAAARKGMLQDSFFPTWSNDATDVNLDSPEEMQKNDPLATQIWKLYSKAKTQLPNAERMENLTWRMMAMSMKRAELDRRGFGHQPQADAMNLDDFIFPSSVASPAGLSPSPSNERTASSNTTAPGIPIRKTSQMGDQNHHLARASAPSVPPTISREHDFEYIQRHVRKTSIDERRHQPRKRPAENSPQVPAVNSIMIPNEPEADAALHHYTLDQPMHPPTFQHHGSQPQVPYSIDNFQLQDDPIISSAGPFQQQFTFSPVGSPMMAQGGPYSAMYNPNSMGSSLNSADYYSPPGSAYPSTVSTPQPMAEGDGQMYFDRTGMDIRQPHGLPSQYGPHRPS…	873	93.4003	7.813	45.03	-0.78	0(N)	Nucleus	2	PF08550;PF00320	Nitrogen regulatory protein areA, GATA-like domain;GATA zinc finger	IWKLYSKAKTQLPNAERMENLTWRMMAM;CTNCFTQTTPLWRRNPEGHPLCNACGLFLKLHGV	102;642	129;675	9.6e-10;6.7e-13	1	CTNCFTQTTPLWRRNPEGHPLCNAC	Type IVa
180	EnsemblFungi	Ascomycota	Dothideomycetes	Mytilinidiales	Mytilinidion resinicola str. CBS 304.34	Mres3	KAF2813964	MPLDVNDPMVSNDMNIYSRPQFASPMVTSPVSPDFASTTRRLPQENSNSTIQTNDQFGPESGNGTPDVQSSMPSRTGSQEQVFRSNSRPGSNPSSTQNSSHQIPTVLSFRPEPTQQLEESLPSSGLKFPWRATTNGFPSTMSGRSHVEHAQYKNAYSLTGFNMLEVLTRVANRPNPEINIGNVDFSCAFVVCDAQKDDVPIVFCSDNFERLTGYTKYMILGRNCRFLQSPDGYVEAGIKRKYVDDDSVLYLKNMINMRKEAQISLINYRRGGQPFMNLLTMIPITMAESDEIKYYVGFQVDLVEQPASMTNKNPDGSYTVNYQRGINVPSYVFIDHNFNLPDAIQTVTRDEVSNALSTFSTSGDSEFTRTIWDKVLLENTDDVVHVLSLKGLFLYLSPS…	870	95.4818	8.676	67.24	-0.571	0(N)	Nucleus	3	PF13426;PF08447;PF00320	PAS domain;PAS fold;GATA zinc finger	AFVVCDAQKDDVPIVFCSDNFERLTGYTKYMILGRNCRFLQSPDGYVEAGIKRKYVDDDSVLYLKNMINMRKEAQISLINYRRGGQPFMNLLTMIPITMAESDEIKYYVGFQVDL;LYLSPSSQKVLEYEPSELAGSALSSICHPSDIVPVTRELKDTSNGASVNVVFRIRRKRSGYMWFEGHGSLHSEQGK;CANCHTRVTPEWRRGPSGNRDLCNSCGLRWAKQN	188;394;748	302;469;781	4.4e-12;3.7e-07;1.4e-10	1	CANCHTRVTPEWRRGPSGNRDLCNSC	Type IVb
181	EnsemblFungi	Ascomycota	Dothideomycetes	Mytilinidiales	Mytilinidion resinicola str. CBS 304.34	Mres4	KAF2816184	MAENLSMLNHPQHHRPAGTSPQASTEAASPEHDAMSTASQGAQTDISEYHSLEDTLAHRQPPPDPSSPHASPAAMQQRPQATNAPVNGQVCSNCGTTHTPLWRRSPTGETICNACGLYWKARNQSRPTNLKRTVQPTTLAVQQTQATGQPHDRSDSPSGRTTSPRATYVAADQSTTGTCPGGGRCNGTGGQQGCNGCPAYNNRVSKTAQFALAPASAQQSASPAPGSGDAPASSAADNSNAPAGHSLGQNAASVVPACQNCGTTITPLWRRDELGHTICNACGLYHKLHGAHRPVAMKKQEIKRRKRVVPAPPDMTYSPSQATQGTPRGFDSSVSPDPSTSLPEPSEPYADPQASCAYGPLPVDFTNFHHSTSSSATNPRLSYQQQPSPSAPSPRKRSL…	503	53.0616	7.604	47.34	-0.837	0(N)	Nucleus	2	PF00320;PF00320	GATA zinc finger;GATA zinc finger	CSNCGTTHTPLWRRSPTGETICNACGLYWKARN;CQNCGTTITPLWRRDELGHTICNACGLYHKLHG	91;258	123;290	2.3e-11;1.4e-10	2	CSNCGTTHTPLWRRSPTGETICNAC;CQNCGTTITPLWRRDELGHTICNAC	Type IVa;Type IVa
182	EnsemblFungi	Ascomycota	Dothideomycetes	Mytilinidiales	Mytilinidion resinicola str. CBS 304.34	Mres5	KAF2817272	MTYATSAPATSGGQANSPPVCQNCTTSTTPLWRRDETGSVLCNACGLFLKLHGRPRPISLKTDVIKSRNRVKTAGQGPRKNKSTDANGLPAAHPDADPLSALTQHRRQSQKMSSGNSERSNSPISRTGTPSLQHPSNIAPQHMFDGVIHGDVYHSPSLPSFHIRQPSPGSTSSVNGSHLEPPLSYEALAAQNTSLKTRVSELEVINGLFKGRVNELEQSEQNARDNENIARDTEAHLRAKLEDARQREAELKRKLEDLEAEGGPRHKKIRLNDIIDESRASTPFSSTAE	289	31.4896	9.077	65.57	-0.841	0(N)	Nucleus	2	PF00320;PF25026	GATA zinc finger;Asd-4-like domain	CQNCTTSTTPLWRRDETGSVLCNACGLFLKLHGR;SYEALAAQNTSLKTRVSELEVINGLFKGRVNELEQSEQNARDNENIARDTEAHLRAKLEDARQREAELKRKLEDLEAE	21;184	54;261	1.8e-11;6.5e-28	1	CQNCTTSTTPLWRRDETGSVLCNAC	Type IVa
183	EnsemblFungi	Ascomycota	Dothideomycetes	Mytilinidiales	Mytilinidion resinicola str. CBS 304.34	Mres6	KAF2817689	MLLATALHIVPTRPHLASALAVTCTPARPVSSPRPHRAWHRLAARRLHRLQSPPSPQELEQAARIQEASGGPWSVGSVRRRSIAQARSPHRAIVLREATYPVEPEIPAIEETLLPLNACEQRVLPPRARDGNAGCRHQAKVRCFVGLPSINYLESDKITRDEDGYQRKHSAAAMASPSYPFPGPPPPYSNHQSTGASSTGAISGLISPPESRRTSSENEKEQRQSARQSLPSIHEALGDGQPLSYPAPPPSAPVSAPQHYQPPPATSGADVRPRTFSSDLQNQGPANPYAHPRSPYTTPAPPSTAGPPPPQEPLPRPPFSSSSHNPKLPTLHPLRTQSPPINASRPSIPYSPYSQHPTQSTYEQAPSSAGPMNPPYGGSYNQFPQQYGPYSAPAPGAPG…	634	68.8019	9.631	53.68	-0.877	0(N)	Cytoplasm|Nucleus	1	PF00320	GATA zinc finger	CHSCNRAETPEWRRGPDGARTLCNACGLHYAKL	575	607	2.5e-10	1	CHSCNRAETPEWRRGPDGARTLCNAC	Type IVb
184	EnsemblFungi	Ascomycota	Dothideomycetes	Pleosporales	Alternaria alternata	Aalt1	RYN67398	MDTMDAGSRQSIGLPSINHMDADRVKREEVEYQRKHSVAAAMPSPMHPYAGPPHLHSNHQSSVASAVPGSLGGLLSPPESRRTSGDEKETQRPTARQSLPSIHEALGSEQPLSYPSTVPPPSAVTSAPQHYHPHSAAASPAEPRPRPFPSDPQHASQGPSNPFTYPRSPFVGAPASPTVSRQPPQVQSDSLPRPPFSEPRPPYSTPQHNPKLPTLHPLKTTQSPPPSVARPNAPYSSYPPPPSATYESPAPSSAGPMNHHYPYTQYPNYPSSTPSASASNSAYPPASSTYSAPPRYAPQPWQDNSEMARLEEKKIGRSSLAPYGESVKRHLESFDLEASLNEMADGSGRVAEFSKVYRQRAHENQRIGLTPQSMPRLDEVDDMIKQSERIQMSLQRMRE…	519	56.6562	9.213	43.72	-0.994	0(N)	Nucleus	1	PF00320	GATA zinc finger	CHSCNRAETPEWRRGPDGARTLCNACGLHYAKL	460	492	2e-10	1	CHSCNRAETPEWRRGPDGARTLCNAC	Type IVb
185	EnsemblFungi	Ascomycota	Dothideomycetes	Pleosporales	Alternaria alternata	Aalt2	RYN69362	MAESLRLLNQAHEHHRPRTETPSQEQHQIQGQGDERSEIYHSLEDAVPISEQPTTPATSTSLQLPSMNYDASNAPVTGQVCSNCKTTQTPLWRRSPAGETVCNACGLYMKARNQSRPVNLKRNTQTQPIMPVQQSPTSGPGDGNGTSPGNLAASPRVATYVAADQMTAGTCPGGGRCNGTGGQQGCSGCPAFNNRVSKTAKFALAQANATSSDGTNGADAASSSAAAGSTSAIPACQNCATTITPLWRRDDAGHIICNACGLYYKLHGTHRPVAMKKQEIKRRKRVVPAGDTSSQATPSVADYSPPQRPSQTPAFEHSVSPDPSTAIESREDYTPEPPRGPIAVDFTHYYGKASVTSNPAALIPNMQSNAPSPRKRSRSATMDPEETANPMPHRPNAIS…	469	50.0668	8.221	53.01	-0.799	0(N)	Nucleus	2	PF00320;PF00320	GATA zinc finger;GATA zinc finger	CSNCKTTQTPLWRRSPAGETVCNACGLYMKARN;CQNCATTITPLWRRDDAGHIICNACGLYYKLHGT	81;236	113;269	2.6e-11;5.7e-12	2	CSNCKTTQTPLWRRSPAGETVCNAC;CQNCATTITPLWRRDDAGHIICNAC	Type IVa;Type IVa
186	EnsemblFungi	Ascomycota	Dothideomycetes	Pleosporales	Alternaria alternata	Aalt3	RYN70620	MDFATAAGAMEVQSAEDTSKRGMLQDAIFPAFGNDAGTPSVESPEELQKNDPLGTQIWKLYSRAKTQLPNAERMENLTWRMMAMNMRRAEMDRNKGPAPDAQNNEMMPPPPTSSSARPPPRSAPSGIAQQLRKSQDQQAQVQVQVQANSPHDAMNLDDFIFPSSVGSPAGLSPELSNDDAAPFNPSAPAIPIRKPHLANDHNLSLARASAPSVPPAIHREDEFGYVPRHVRKTSIDERRPPKRRAEASPLVPPVNSIMIPTDAQAEQDLHQYSLDSHSMQPPTFPASQAQVPFSIDTFSMHDQDPVIHSAGPYQQSFSGFSPVGSPLMSHNAFNSNMFNQHSMASSLNSTDYYSPPSSAFPSTVSTPQPIPEDNQMYFDRSGMDVRNTHGSASYGPHRP…	858	92.0007	6.725	49.43	-0.741	0(N)	Nucleus	2	PF08550;PF00320	Nitrogen regulatory protein areA, GATA-like domain;GATA zinc finger	IWKLYSRAKTQLPNAERMENLTWRMMAM;CTNCFTQTTPLWRRNPEGHPLCNACGLFLKLHGV	57;640	84;673	3.1e-09;6.6e-13	1	CTNCFTQTTPLWRRNPEGHPLCNAC	Type IVa
187	EnsemblFungi	Ascomycota	Dothideomycetes	Pleosporales	Alternaria alternata	Aalt4	RYN78006	MNSNDNDNMRKGTPEKKMPSPLSKPSNGLSMTYATSAPATAGGQAGSPPSCMNCSTSTTPLWRRDETGAVLCNACGLFLKLHGRPRPISLKTDVIKSRNRVKTGGPGGRKRTSDQGGLPAAHPDADGQLALAQHRRASGKISSGLSDRSQSPISRTGTPNFNHPSNIAPSHLFEQALHGGDFHSPSLPGFGIRAPSPANSSINGSHLEAPLPYETLAAQNTALKTRVSEMELINDLFRNRVSELEQSEQSARQTESTLRQELEEIKQREADLKRRLDEIEADSPRHKKMKMSEFVDESRAGTPISAMVE	309	33.413	9.208	61.68	-0.78	0(N)	Nucleus	2	PF00320;PF25026	GATA zinc finger;Asd-4-like domain	CMNCSTSTTPLWRRDETGAVLCNACGLFLKLHGR;YETLAAQNTALKTRVSEMELINDLFRNRVSELEQSEQSARQTESTLRQELEEIKQREADLKRRLDEIEAD	51;213	84;282	3.9e-11;1.3e-22	1	CMNCSTSTTPLWRRDETGAVLCNAC	Type IVa
188	EnsemblFungi	Ascomycota	Dothideomycetes	Pleosporales	Alternaria alternata	Aalt5	RYN80387	MAQYQNGGAEMMAGLPMHAQGQEFNGLPMDDGMQSMDLDMGSLDGAEGGQNGGFSFADPQMQAASVPASSTMGDMQMTGAGAGPLPTGFGAPNMNPSGSTLTEFTKRRNWSQRVLEELRDLLHILTPDGRILYVSPSCKALTGWEPSHVMGRFINEFIHPDDIGIFVKEFNESIASGNPLRFFYRFRKTDDSWAIFESHGHPHLSSDQNTFAPPNSINCRGFFMMARPYPTKNAALLDSFLEHKIENERLMKRIAELKREEQDEQDDWAKKIEGTATSVTPSESHVTQNMSQADAASYAQMPPPAKPVISNTALTRQNLDEALAASKPDSINDKMMRYEGANHLETIEMLTGLRYRDGERSQGISTGDASPNLIRGDAGIQISLDRDGRNSSDKKKKLK…	470	51.5403	5.699	56.57	-0.662	0(N)	Nucleus	2	PF08447;PF00320	PAS fold;GATA zinc finger	ILYVSPSCKALTGWEPSHVMGRFINEFIHPDDIGIFVKEFNESIASGNPLRFFYRFRKTDDSWAIFESHGHPHLSSD;CTDCGTLDSPEWRKGPNGPKTLCNACGLRWAKKEKK	131;406	207;441	1.6e-09;1.5e-11	1	CTDCGTLDSPEWRKGPNGPKTLCNAC	Type IVb
189	EnsemblFungi	Ascomycota	Dothideomycetes	Pleosporales	Alternaria alternata	Aalt6	RYN84518	MNGYPYPTRPFNQANNGNVMMNMNGDAMNGFNMVEGQSLDSIVAQNDKDNRRRSMPVYARGPQQQQQQQQQQQQQQMTLGSPDTRRLSMMNFGDPNGGDMDDFQFDMSTAAMDNMMRSNTFPRTTADIQNDQLPAADLNINTQFQSQASPFPNMATPGSTYASPMHQKNSIDLDMGSYQNGMTMPLDMDDSLNMMPTDMNMFPGNQFNTPMLDSPLNQDFVGPMPAAPQGNNTPSGQAQDQFKRPSLNNTPEVKSGRSSFLSRTTSQDQSSMRSTSRPQSEHRSSNSVPTRMTLASLQNQQPIGQDPAQDLPKEVMNKQLQDFKIPWQQPAGGFPSTMHQNPHMKTQFKNAYSSTGFDMLGVLMRVATRPDPQIDIGSVDLSCAFVVCDAELDDIPIVY…	1073	119.175	8.633	58.45	-0.731	0(N)	Nucleus	3	PF13426;PF08447;PF00320	PAS domain;PAS fold;GATA zinc finger	AFVVCDAELDDIPIVYCSENFERLTGYTRHMILGRNCRFLQAPDGKVESGIKRNYVDDDSVYYLKNMIESRAEAQISLINYRRGGQPFMNLLTMIPIAWEPGGKMKFFVGFQVDL;LYLSPASNRILEYDPSELVGTALSSVCHPSDIVPVTRELKETTNGASVNVVFRIRRKKSGYMWFEGHGSLHTEQGK;CANCHTRTTPEWRRGPSGNRDLCNSCGLRWAKQ	384;591;942	498;666;974	4.6e-12;9.9e-08;3.6e-11	1	CANCHTRTTPEWRRGPSGNRDLCNSC	Type IVb
190	EnsemblFungi	Ascomycota	Dothideomycetes	Pleosporales	Alternaria arborescens	Aarb1	RYN26428	MAQYQNGGAEMMAGLPMHAQGQEFNGLSMDDGMQSMDLDMGSLDGAEGGQNSGFSFADPQMQAASVPASSTMGDMQMTGAGAGPLPTGFGAPNMNPSGSTLTEFTKRRNWSQRVLEELRDLLHILTPDGRILYVSPSCKALTGWEPSHVMGRFINEFIHPDDIGIFVKEFNESIASGNPLRFFYRFRKTDDSWAIFESHGHPHLSSDQNTFAPPNTINCRGFFMMARPYPTKNAALLDSFLEHKIENERLMKRIAELKREEQDEQDDWAKKIEGTATSVTPSESHVTQNMSQADAASYAQMPPPAKPVISNTALTRQNLDEALAASKPDSINDKMMRYEGANHLETIEMLTGLRYRDGERSQGISTGDASPNLIRGDAGIQISLDRDGRNSSDKKKKLK…	470	51.5744	5.699	56.57	-0.661	0(N)	Nucleus	2	PF08447;PF00320	PAS fold;GATA zinc finger	ILYVSPSCKALTGWEPSHVMGRFINEFIHPDDIGIFVKEFNESIASGNPLRFFYRFRKTDDSWAIFESHGHPHLSSD;CTDCGTLDSPEWRKGPNGPKTLCNACGLRWAKKEKK	131;406	207;441	1.6e-09;1.5e-11	1	CTDCGTLDSPEWRKGPNGPKTLCNAC	Type IVb
191	EnsemblFungi	Ascomycota	Dothideomycetes	Pleosporales	Alternaria arborescens	Aarb2	RYN26887	MDFATAAGAMEVQSAEDTSKRGMLQDAIFPAFGNDAGTPSVESPEELQKNDPLGTQIWKLYSRAKTQLPNAERMENLTWRMMAMNMRRAEMDRNKGPAPDAQNNEMMPPPPTSSSARPPPRSAPSGIAQQLRKSQDQQAQVQVQVQANSPHDAMNLDDFIFPSSVGSPAGLSPELSNEDAAPFNPSAPAIPIRKPHLANDHNLSLARASAPSVPPAIHREDEFGYVPRHVRKTSIDERRPPKRRAEASPLVPPVNSIMIPTDAQAEQDLHQYSLDSHSMQPPTFPASQAQVPFSIDTFSMHDQDPVIHSAGPYQQSFSGFSPVGSPLMSHNAFNSNMFNQHSMASSLNSTDYYSPPSSAFPSTVSTPQPIPEDNQMYFDRNGMDIRNTHGSASYGPHRP…	858	92.1238	6.725	49.55	-0.75	0(N)	Nucleus	2	PF08550;PF00320	Nitrogen regulatory protein areA, GATA-like domain;GATA zinc finger	IWKLYSRAKTQLPNAERMENLTWRMMAM;CTNCFTQTTPLWRRNPEGHPLCNACGLFLKLHGV	57;640	84;673	3.1e-09;6.6e-13	1	CTNCFTQTTPLWRRNPEGHPLCNAC	Type IVa
192	EnsemblFungi	Ascomycota	Dothideomycetes	Pleosporales	Alternaria arborescens	Aarb3	RYN33093	MNGYPYPARPFNQANNGNVMMNMNGDAMNGFNMVEGQSLDSIVAQNDKDNRRRSMPVYARGPQQQQQQQQRQQQQINLGSPDTRRLSMMNFGDPNGGDMDDFQFDMSTAAMDNMMRSNTFPRTTADIQNDQLPAADLNINTQFQSQASPFPNMATPGSAYASPMHQKNSIDLDMGSYQNGMTMPLDMDDSLNMMPTDMNMFPGNQFNTPMLDSPLNQDFVGPMPAAPQGNNTPSGQAQDQFKRPSLNNTPEVKSGRSSFLSRTTSQDQSSMRSTSRPQSEHRSSNSVPTRMTLASLQNQQPIGQDPAQDLPKEVMNKQLQDFKTPWQQPAGGFPSTMHQNPHMKTQFKNAYSSTGFDMLGVLMRVATRPDPQIDIGSVDLSCAFVVCDAELDDIPIVYC…	1072	119	8.712	58.33	-0.735	0(N)	Nucleus	3	PF13426;PF08447;PF00320	PAS domain;PAS fold;GATA zinc finger	AFVVCDAELDDIPIVYCSENFERLTGYTRHMILGRNCRFLQAPDGKVESGIKRNYVDDDSVYYLKNMIESRAEAQISLINYRRGGQPFMNLLTMIPIAWEPGGKMKFFVGFQVDL;LYLTPASNRILEYDPSELVGTALSSVCHPSDIVPVTRELKETTNGASVNVVFRIRRKKSGYMWFEGHGSLHTEQGK;CANCHTRTTPEWRRGPSGNRDLCNSCGLRWAKQ	383;590;941	497;665;973	4.6e-12;4.7e-07;3.6e-11	1	CANCHTRTTPEWRRGPSGNRDLCNSC	Type IVb
193	EnsemblFungi	Ascomycota	Dothideomycetes	Pleosporales	Alternaria arborescens	Aarb4	RYN37952	MNSNDNDNMRKETPEKKMPSPLSKPSNGLSMTYATSAPATAGGQAGSPPSCMNCSTSTTPLWRRDETGAVLCNACGLFLKLHGRPRPISLKTDVIKSRNRVKTGGPGGRKRTSDQGGLPAAHPDADGQLALAQHRRASGKISSGLSDRSQSPISRTGTPNFNHPSNIAPSHLFEQALHGGDFHSPSLPGFGIRAPSPANSSINGSHLEAPLPYETLAAQNTALKTRVSEMELINDLFRNRVSELEQSEQSARQTESTLRQELEEIKQREADLKRRLDEIEADSPRHKKMKMSEFVDESRAGTPISAMVE	309	33.4851	9.06	61.68	-0.79	0(N)	Nucleus	2	PF00320;PF25026	GATA zinc finger;Asd-4-like domain	CMNCSTSTTPLWRRDETGAVLCNACGLFLKLHGR;YETLAAQNTALKTRVSEMELINDLFRNRVSELEQSEQSARQTESTLRQELEEIKQREADLKRRLDEIEAD	51;213	84;282	3.9e-11;1.3e-22	1	CMNCSTSTTPLWRRDETGAVLCNAC	Type IVa
194	EnsemblFungi	Ascomycota	Dothideomycetes	Pleosporales	Alternaria arborescens	Aarb5	RYN38999	MAESLRLLNQAHEHHRPRTETPSQEQHQIQGQGDERSEIYHSLEDAVPISEQPTTPATSTSLQLPSMNYDASNAPVTGQVCSNCKTTQTPLWRRSPAGETVCNACGLYMKARNQSRPVNLKRNTQTQPIMPVQQSPTPGPGDGNGTSPGNLAASPRVATYVAADQMTAGTCPGGGRCNGTGGQQGCSGCPAFNNRVSKTAKFALAQANATSSDGTNGADAASSSAAAGSTSAIPACQNCATTITPLWRRDDAGHIICNACGLYYKLHGTHRPVAMKKQEIKRRKRVVPAGDTSSQATPSVADYSPPQRPSQTPAFEHSVSPDPSTAIESREDYTPEPPRGPIAVDFTHYYGKASVTSNPAALVPNMQPNAPSPRKRSRSATMDPEETANPMPHRPNAIS…	469	50.099	8.221	53.62	-0.792	0(N)	Nucleus	2	PF00320;PF00320	GATA zinc finger;GATA zinc finger	CSNCKTTQTPLWRRSPAGETVCNACGLYMKARN;CQNCATTITPLWRRDDAGHIICNACGLYYKLHGT	81;236	113;269	2.6e-11;5.7e-12	2	CSNCKTTQTPLWRRSPAGETVCNAC;CQNCATTITPLWRRDDAGHIICNAC	Type IVa;Type IVa
195	EnsemblFungi	Ascomycota	Dothideomycetes	Pleosporales	Alternaria arborescens	Aarb6	RYN43350	MDTMDAGSRQSIGLPSINHMDTDRVKREEVEYQRKHSVAAAMPSPMHPYAGPPHLHSNHQSSVASAVPGSLGGLLSPPESRRTSGDEKETQRPTARQSLPSIHEALGSEQPLSYPSTVPPPSAVTSAPQHYHPHSAAASPAEPRPRPFPSDPQHASQGPSNPFTYPRSPFVGAPASPTVSRQPPQVQSDSLPRPPFSEPRPPYSTPQHNPKLPTLHPLKTTQSPPPSVARPDAPYSSYPPPPSATYESPAPSSAGPMNHHYPYTQHPNYPSSTPSASASNSAYPPASSTYSAPPRYAPQPWQDNSEMARLEEKKIGRSSLAPYGESVKRHLESFELEASLNEMADGSGRIAEFSKVYRQRAHENQRIGLTPQSMPRLDEVDDMIKQSERIQMSLQRMRE…	519	56.6752	9.144	43.53	-1.002	0(N)	Nucleus	1	PF00320	GATA zinc finger	CHSCNRAETPEWRRGPDGARTLCNACGLHYAKL	460	492	2e-10	1	CHSCNRAETPEWRRGPDGARTLCNAC	Type IVb
196	EnsemblFungi	Ascomycota	Dothideomycetes	Pleosporales	Alternaria sp. MG1	Amg1	RII06429	MNGYPYPTRPFNQANNGNVMMNMNGDAMNGFNMVESQSLDSIVAQNDKDSRRRSMPVYARGPQQQQQQQRQQQQQQQMNLGSPDTRRLSMMNFGDPNGGDMDDFQFDMSTAAMDNMMRSNTFPRTTADIQNDQLPAADLNINTQFQSQASPFPNMATPGSAYASPMHQKNSLDLDMGSYQNGMTMPLDMDDSLNIMPTDMNMFPGNQFNTPMLDSPLNQDFVGPMPVAPQGNNTPSRQAQDQFKRPSLNNTPEVKSGRSSFLSRTTSQDQSSMRSTSRPQSEHRSSNSVPTRMTLASLQNQQPIGQDPAQDLPKEVMNKQLQDFKIPWQQPTGGFPSTMHQNPHMKTQFKNAYSSTGFDMLGVLMRVATRPDPQIDIGSVDLSCAFVVCDAELDDIPIV…	1025	114.831	8.851	59.55	-0.748	0(N)	Nucleus	3	PF13426;PF08447;PF00320	PAS domain;PAS fold;GATA zinc finger	AFVVCDAELDDIPIVYCSENFERLTGYTRHMILGRNCRFLQAPDGKVESGIKRNYVDDDSVYYLKNMIESRAEAQISLINYRRGGQPFMNLLTMIPIAWEPGGKMKFFVGFQVDL;LYLSPASNRILEYDPSELVGTALSSVCHPSDIVPVTRELKETTNGASVNVVFRIRRKKSGYMWFEGHGSLHTEQGK;CANCHTRTTPEWRRGPSGNRDLCNSCGLRWAKQ	385;592;943	499;667;975	4.4e-12;9.3e-08;1.4e-11	1	CANCHTRTTPEWRRGPSGNRDLCNSC	Type IVb
197	EnsemblFungi	Ascomycota	Dothideomycetes	Pleosporales	Alternaria sp. MG1	Amg2	RII07310	MMAGLPMHAQGQEFNGLPMDDGMQSMDLDMGSLDGAEGGQNGGFSFADPQMQAASVPASSTMGDMQMTGAGAGPLPTGFGAPNMNPSGSTLTEFTKRRNWSQRVLEELRDLLHILTPDGRILYVSPSCKALTGWEPSHVMGRFINEFIHPDDIGIFVKEFNESIASGNPLRFFYRFRKTDDSWAIFESHGHPHLSSDQNTFAPPNSINCRGFFMMARPYPTKNAALLDSFLEHKIENERLMKRIAELKREEQDEQDDWAKKIEGTATSVTPSESHVTQNMSQADAASYAQMPPPAKPVISNTALTRQNLDEALAASKPDSINDKMMRYEGANHLETIEMLTGLRYRDGERSQGISTGDASPNLIRGDAGIQISLDRDGRNSSDKKKKLKIADEYVCTDC…	460	50.4902	5.787	57.37	-0.654	0(N)	Nucleus	2	PF08447;PF00320	PAS fold;GATA zinc finger	ILYVSPSCKALTGWEPSHVMGRFINEFIHPDDIGIFVKEFNESIASGNPLRFFYRFRKTDDSWAIFESHGHPHLSSD;CTDCGTLDSPEWRKGPNGPKTLCNACGLRWAKKEKK	121;396	197;431	1.5e-09;1.4e-11	1	CTDCGTLDSPEWRKGPNGPKTLCNAC	Type IVb
198	EnsemblFungi	Ascomycota	Dothideomycetes	Pleosporales	Alternaria sp. MG1	Amg3	RII08304	MIDTDAGRHVANTTTSISNVTTNHLVDFTKRRDWQQRTIEAIQDLLYVLAFNGKILYASASCVSVTGYQPTQIAGHFIHDFIHPDDKDVFVKEMGDAIATGDPLRFFHRFRKADGGWIIFESHGHAHLSKGFSRNSLQRGSIDDGGLFITARPDPTKNAALMDSFLEHKIENLRLMDRLRELRDEGEDNSERQDWQEETAEEDAHVSGSDEDSASESSERFRMSESQLPEQAHYVKTTETSRIGDLGIRFSLDSNSRRLSKRKKRGSLEAIGGYMCFSCGNLDSPEWRKGPHGPKTLCNACGLRWAKARRKEQNKELSAFPTLTTSPRS	329	37.1369	6.364	65.59	-0.729	0(N)	Nucleus	2	PF08447;PF00320	PAS fold;GATA zinc finger	ILYASASCVSVTGYQPTQIAGHFIHDFIHPDDKDVFVKEMGDAIATGDPLRFFHRFRKADGGWIIFESHGHAH;CFSCGNLDSPEWRKGPHGPKTLCNACGLRWAKARRK	55;276	127;311	4.6e-10;2.9e-10	1	CFSCGNLDSPEWRKGPHGPKTLCNAC	Type IVb
199	EnsemblFungi	Ascomycota	Dothideomycetes	Pleosporales	Alternaria sp. MG1	Amg4	RII15397	MDFATAAGAMEVQSAEDTSKRGMLQDAIFPAFGNDAGTPSVESPEELQKNDPLGTQIWKLYSRAKTQLPNAERMENLTWRMMAMNMRRAEMDRNKGPAPDAQNNEMMPPPPTSSSARPPPRSAPSGIAQQLRKSQDQQAQVQVQVQANSPHDAMNLDDFIFPSSVGSPAGLSPELSNEDAAPFNPSAPAIPIRKPHLANDHNLSLARASAPSVPPAIHREDEFGYVPRHVRKTSIDERRPPKRRAEASPLVPPVNSIMIPTDAQAEQDLHQYSLDSHSMQPPTFPASQAQVPFSIDTFSMHDQDPVIHSAGPYQQSFSGFSPVGSPLMSHNAFNSNMFNQHSMASSLNSTDYYSPPSSAFPSTVSTPQPIPEDNQMYFDRSGMDIRNTHGSASYGPHRP…	858	92.0558	6.725	49.55	-0.743	0(N)	Nucleus	2	PF08550;PF00320	Nitrogen regulatory protein areA, GATA-like domain;GATA zinc finger	IWKLYSRAKTQLPNAERMENLTWRMMAM;CTNCFTQTTPLWRRNPEGHPLCNACGLFLKLHGV	57;640	84;673	3.1e-09;6.6e-13	1	CTNCFTQTTPLWRRNPEGHPLCNAC	Type IVa
200	EnsemblFungi	Ascomycota	Dothideomycetes	Pleosporales	Alternaria sp. MG1	Amg5	RII16341	MPVQQSPTPGPGDGNGTSPGNLAASPRVATYVAADQMTAGTCPGGGRCNGTGGQQGCSGCPAFNNRVSKTAKFALAQANATSSDGTNGADAASSAAAAGSTSAIPACQNCATTITPLWRRDDAGHIICNACGLYYKLHGTHRPVAMKKQEIKRRKRVVPAGDTSSQATPSVADYSPPQRPSQTPAFEHSVSPDPSTAIESREDYTPEPPRGPIAVDFTHYYGKASVTSNPAALIPNMQSNAPSPRKRSRSATMDPEETANPMPHRPNAISSILNPSQADADANIDPSLSVPLRPSAGTSPNPGMSQEEKAARRERLRKEAEAMRQELARRQKELDELEND	340	35.6981	8.397	51.59	-0.739	0(N)	Nucleus	1	PF00320	GATA zinc finger	CQNCATTITPLWRRDDAGHIICNACGLYYKLHGT	107	140	3.7e-12	1	CQNCATTITPLWRRDDAGHIICNAC	Type IVa
201	EnsemblFungi	Ascomycota	Dothideomycetes	Pleosporales	Alternaria sp. MG1	Amg6	RII21159	MDTMDAGSRQSIGLPSINHMDADRVKREEVEYQRKHSVAAAMPSPMHPYAGPPHLHSNHQSSVASAVPGSLGGLLSPPESRRTSGDEKETQRPTARQSLPSIHEALGSEQPLSYPSTVPPPSAITSAPQHYHPHSAAASPAEPRPRPFPSDPQHASQGPSNPFTYPRSPFVGAPASPTVSRQPPQVQSDSLPRPPFSEPRPPYSTPQHNPKLPTLHPLKTTQSPPSSVARPNAPYSSYPPPPSATYESPAPSSAGPMNHHYPYTQYPNYPSSTPSASASNSAYPPASSTYSAPPRYAPQSWQDNSEMARLEEKKIGRSSLAPYGESVKRHLESFDLEASLNEMADGSGRIAEFSKVYRQRAHENQRIGLTPQSMPRLDEVDDMIKQSERIQMSLQRMRE…	519	56.6641	9.213	44.1	-0.99	0(N)	Nucleus	1	PF00320	GATA zinc finger	CHSCNRAETPEWRRGPDGARTLCNACGLHYAKL	460	492	2e-10	1	CHSCNRAETPEWRRGPDGARTLCNAC	Type IVb
202	EnsemblFungi	Ascomycota	Dothideomycetes	Pleosporales	Alternaria sp. MG1	Amg7	RII24672	MNSNDNDNMRKGTPEKKMPSPLSKPSNGLSMTYATSAPATAGGQAGSPPSCMNCSTSTTPLWRRDETGAVLCNACGLFLKLHGRPRPISLKTDVIKSRNRVKTGGPGGRKRTSDQGGLPAAHPDADGQLALAQHRRASGKISSGLSDRSQSPISRTGTPNFNHPSNIAPSHLFEQALHGGDFHSPSLPGFGIRAPSPANSSINGSHLEAPLPYETLAAQNTALKTRVSEMELINDLFRNRVSELEQSEQSARQTESTLRQELEEIKQREADLKRRLDEIEADSPRHKKMKMSEFVDESRAGTPISAMVE	309	33.413	9.208	61.68	-0.78	0(N)	Nucleus	2	PF00320;PF25026	GATA zinc finger;Asd-4-like domain	CMNCSTSTTPLWRRDETGAVLCNACGLFLKLHGR;YETLAAQNTALKTRVSEMELINDLFRNRVSELEQSEQSARQTESTLRQELEEIKQREADLKRRLDEIEAD	51;213	84;282	3.9e-11;1.3e-22	1	CMNCSTSTTPLWRRDETGAVLCNAC	Type IVa
203	EnsemblFungi	Ascomycota	Dothideomycetes	Pleosporales	Alternaria tenuissima	Aten1	RYN79962	MAESLRLLNQAHEHHRPRTETPSQEQHQIQGQGDERSEIYHSLEDAVPISEQPTTPATSTSLQLPSMNYDASNAPVTGQVCSNCKTTQTPLWRRSPAGETVCNACGLYMKARNQSRPVNLKRNTQTQPIMPVQQSPTSGPGDGNGTSPGNLAASPRVATYVAADQMTAGTCPGGGRCNGTGGQQGCSGCPAFNNRVSKTAKFALAQANATSSDGTNGADAASSSAAAGSTSAIPACQNCATTITPLWRRDDAGHIICNACGLYYKLHGTHRPVAMKKQEIKRRKRVVPAGDTSSQATPSVADYSPPQRPSQTPAFEHSVSPDPSTAIESREDYTPEPPRGPIAVDFTHYYGKASVTSNPAALIPNMQSNAPSPRKRSRSATMDPEETANPMPHRPNAIS…	469	50.0668	8.221	53.01	-0.799	0(N)	Nucleus	2	PF00320;PF00320	GATA zinc finger;GATA zinc finger	CSNCKTTQTPLWRRSPAGETVCNACGLYMKARN;CQNCATTITPLWRRDDAGHIICNACGLYYKLHGT	81;236	113;269	2.6e-11;5.7e-12	2	CSNCKTTQTPLWRRSPAGETVCNAC;CQNCATTITPLWRRDDAGHIICNAC	Type IVa;Type IVa
204	EnsemblFungi	Ascomycota	Dothideomycetes	Pleosporales	Alternaria tenuissima	Aten2	RYN80578	MEVQSAEDTSKRGMLQDAIFPAFGNDAGTPSVESPEELQKNDPLGTQIWKLYSRAKTQLPNAERMENLTWRMMAMNMRRAEMDRNKGPAPDAQNNEMMPPPPTSSSARPPPRSAPSGIAQQLRKSQDQQAQVQVQVQANSPHDAMNLDDFIFPSSVGSPAGLSPELSNEDAAPFNPSAPAIPIRKPHLANDHNLSLARASAPSVPPAIHREDEFGYVPRHVRKTSIDERRPPKRRAEASPLVPPVNSIMIPTDAQAEQDLHQYSLDSHSMQPPTFPASQAQVPFSIDTFSMHDQDPVIHSAGPYQQSFSGFSPVGSPLMSHNAFNSNMFNQHSMASSLNSTDYYSPPSSAFPSTVSTPQPIPEDNQMYFDRSGMDIRNTHGSASYGPHRPSNLSTSMQP…	849	91.2179	6.843	49.72	-0.755	0(N)	Nucleus	2	PF08550;PF00320	Nitrogen regulatory protein areA, GATA-like domain;GATA zinc finger	IWKLYSRAKTQLPNAERMENLTWRMMAM;CTNCFTQTTPLWRRNPEGHPLCNACGLFLKLHGV	48;631	75;664	3e-09;6.5e-13	1	CTNCFTQTTPLWRRNPEGHPLCNAC	Type IVa
205	EnsemblFungi	Ascomycota	Dothideomycetes	Pleosporales	Alternaria tenuissima	Aten3	RYN84923	MAQYQNGGAEMMAGLPMHAQGQEFNGLPMDDGMQSMDLDMGSLDGAEGGQNGGFSFADPQMQAASVPASSTMGDMQMTGAGAGPLPTGFGAPNMNPSGSTLTEFTKRRNWSQRVLEELRDLLHILTPDGRILYVSPSCKALTGWEPSHVMGRFINEFIHPDDIGIFVKEFNESIASGNPLRFFYRFRKTDDSWAIFESHGHPHLSSDQNTFAPPNSINCRGFFMMARPYPTKNAALLDSFLEHKIENERLMKRIAELKREEQDEQDDWAKKIEGTATSVTPSESHVTQNMSQADAASYAQMPPPAKPVISNTALTRQNLDEALAASKPDSINDKMMRYEGANHLETIEMLTGLRYRDGERSQGISTGDASPNLIRGDAGIQISLDRDGRNSSDKKKKLK…	470	51.5403	5.699	56.57	-0.662	0(N)	Nucleus	2	PF08447;PF00320	PAS fold;GATA zinc finger	ILYVSPSCKALTGWEPSHVMGRFINEFIHPDDIGIFVKEFNESIASGNPLRFFYRFRKTDDSWAIFESHGHPHLSSD;CTDCGTLDSPEWRKGPNGPKTLCNACGLRWAKKEKK	131;406	207;441	1.6e-09;1.5e-11	1	CTDCGTLDSPEWRKGPNGPKTLCNAC	Type IVb
206	EnsemblFungi	Ascomycota	Dothideomycetes	Pleosporales	Alternaria tenuissima	Aten4	RYN93591	MDTMDAGSRQSIGLPSINHMDADRVKREEVEYQRKHSVAAAMPSPMHPYAGPPHLHSNHQSSVASAVPGSLGGLLSPPESRRTSGDEKETQRPTARQSLPSIHEALGSEQPLSYPSTVPPPSAITSAPQHYHPHSAAASPAEPRPRPFPSDPQHASQGPSNPFTYPRSPFVGAPASPTVSRQPPQVQSDSLPRPPFSEPRPPYSTPQHNPKLPTLHPLKTTQSPPSSVARPNAPYSSYPPPPSATYESPAPSSAGPMNHHYPYTQYPNYPSSTPSASASNSAYPPASSTYSAPPRYAPQSWQDNSEMARLEEKKIGRSSLAPYGESVKRHLESFDLEASLNEMADGSGRIAEFSKVYRQRAHENQRIGLTPQSMPRLDEVDDMIKQSERIQMSLQRMRE…	519	56.6641	9.213	44.1	-0.99	0(N)	Nucleus	1	PF00320	GATA zinc finger	CHSCNRAETPEWRRGPDGARTLCNACGLHYAKL	460	492	2e-10	1	CHSCNRAETPEWRRGPDGARTLCNAC	Type IVb
207	EnsemblFungi	Ascomycota	Dothideomycetes	Pleosporales	Alternaria tenuissima	Aten5	RYN95911	MNSNDNDNMRKGTPEKKMPSPLSKPSNGLSMTYATSAPATAGGQAGSPPSCMNCSTSTTPLWRRDETGAVLCNACGLFLKLHGRPRPISLKTDVIKSRNRVKTGGPGGRKRTSDQGGLPAAHPDADGQLALAQHRRASGKISSGLSDRSQSPISRTGTPNFNHPSNIAPSHLFEQALHGGDFHSPSLPGFGIRAPSPANSSINGSHLEAPLPYETLAAQNTALKTRVSEMELINDLFRNRVSELEQSEQSARQTESTLRQELEEIKQREADLKRRLDEIEADSPRHKKMKMSEFVDESRAGTPISAMVE	309	33.413	9.208	61.68	-0.78	0(N)	Nucleus	2	PF00320;PF25026	GATA zinc finger;Asd-4-like domain	CMNCSTSTTPLWRRDETGAVLCNACGLFLKLHGR;YETLAAQNTALKTRVSEMELINDLFRNRVSELEQSEQSARQTESTLRQELEEIKQREADLKRRLDEIEAD	51;213	84;282	3.9e-11;1.3e-22	1	CMNCSTSTTPLWRRDETGAVLCNAC	Type IVa
208	EnsemblFungi	Ascomycota	Dothideomycetes	Pleosporales	Alternaria tenuissima	Aten6	RYO01375	MNGYPYPTRPFNQANNGNVMMNMNGDAMNGFNMVEGQSLDSIVAQNDKDNRRRSMPVYARGPQQQQQQQQQQQQQQMNLGSPDTRRLSMMNFGDPNGGDMDDFQFDMSTAAMDNMMRSNTFPRTTADIQNDQLPAADLNINTQFQSQASPFPNMATPGSAYASPMHQKNSIDLDMGSYQNGMTMPLDMDDSLNMMPTDMNMFPGNQFNTPMLDSPLNQDFVGPMPAAPQGNNTPSGQALDQFKRPSLNNTPEVKSGRSSFLSRTTSQDQSSMRSTSRPQSEHRSSNSVPTRMTLASLQNQQPIGQDPAQDLPKEVMNKQLQDSKIPWQQPAGGFPSTMHQNPHMKTQFKNAYSSTGFDMLGVLMRVATRPDPQIDIGSVDLSCAFVVCDAELDDIPIVY…	1073	119.17	8.712	58.55	-0.737	0(N)	Nucleus	3	PF13426;PF08447;PF00320	PAS domain;PAS fold;GATA zinc finger	AFVVCDAELDDIPIVYCSENFERLTGYTRHMILGRNCRFLQAPDGKVESGIKRNYVDDDSVYYLKNMIESRAEAQISLINYRRGGQPFMNLLTMIPIAWEPGGKMKFFVGFQVDL;LYLSPASNRILEYDPSELVGTALSSVCHPSDIVPVTRELKETTNGASVNVVFRIRRKKSGYMWFEGHGSLHTEQGK;CANCHTRTTPEWRRGPSGNRDLCNSCGLRWAKQ	384;591;942	498;666;974	4.6e-12;9.9e-08;3.6e-11	1	CANCHTRTTPEWRRGPSGNRDLCNSC	Type IVb
209	EnsemblFungi	Ascomycota	Dothideomycetes	Pleosporales	Ampelomyces quisqualis str. HMLAC05119	Aqui1	KAF1912828	MDSKPSNGLSMTYATAAPATAGGQPGAPPVCQNCTTSTTPLWRRDETGSVLCNACGLFLKLHGRPRPISLKTDVIKSRNRVKTGAPGARRKAGESNSLPAAHPDADGSLGLAQQRRASGKMPSGLSDRSQSPVSRTGTPNFLHPSNIAPQHMFEQALSSDVFHSSALGAFGHRAPSPANSSINGSHLDAPLPYDSLAAQNTALKTRVSEMELINDLFRNRVTELENSENAARETEAKLRAELDEVRQRESDLKRRLDELEDESPRHKKPRFSDISDLVDDTRAGSPINAMVD	292	31.4687	8.366	66.95	-0.687	0(N)	Nucleus	2	PF00320;PF25026	GATA zinc finger;Asd-4-like domain	CQNCTTSTTPLWRRDETGSVLCNACGLFLKLHGR;YDSLAAQNTALKTRVSEMELINDLFRNRVTELENSENAARETEAKLRAELDEVRQRESDLKRRLDELEDE	31;193	64;262	1.8e-11;1.9e-22	1	CQNCTTSTTPLWRRDETGSVLCNAC	Type IVa
210	EnsemblFungi	Ascomycota	Dothideomycetes	Pleosporales	Ampelomyces quisqualis str. HMLAC05119	Aqui2	KAF1916754	MVLAAPAAKMHLSPTKHAARRGLLEEAMFPAFGNDAGSPHVESPEQLQKDDPLGTQIWKLYSRAKTQLPNAERMENLTWRLMSVNLRRAELQRNKGTAQSSQSSELMPPPATSLAATARPPPRSAPSGIAQQLRKSSGQQAQVPQPHAQHDAMNLDDFIFPSSVGSPAGLSPEPSNHTPAPFLPTAPSIPIRKPNQASGHDISLARASAPSVPPLPKRENEFAYVPRHVRKTSIDERRPPKRRAEASPQVPPVNSIMIPTDAQAEADLNQYSLDHAMHPPTFPASQAQVSFSIDTFHMHEDPIINSAGPFQQNFGFSPVGSPMMNHNTSYANMFNPNSMASSLNSTDYYSPPSSAFPSTVSTPQPIPDDSQMYFDRTGMDIRGPHGGSSYGPHRPSNLS…	857	91.6929	9.284	52.24	-0.709	0(N)	Nucleus	2	PF08550;PF00320	Nitrogen regulatory protein areA, GATA-like domain;GATA zinc finger	IWKLYSRAKTQLPNAERMENLTWRLMS;CTNCFTQTTPLWRRNPEGHPLCNACGLFLKLHGV	57;637	83;670	1e-08;6.6e-13	1	CTNCFTQTTPLWRRNPEGHPLCNAC	Type IVa
211	EnsemblFungi	Ascomycota	Dothideomycetes	Pleosporales	Ampelomyces quisqualis str. HMLAC05119	Aqui3	KAF1918505	MATLDAASRQRSVVCPVTARPRTPLHPKLHVLTIPFSVGLPSINHLDHPDRVKREEVDYHRKQSTAAMPSPLHPFSGPSHLHSTHQSSPASAVPGSLGGLLSPPESRRTSGDERDSQRPTARQSLPSIHEALGHEQPLSYSVPVPPPSATVSAPQYYHPTSAVTSPSDQRQQTYPGDSRGHQSHANPFSHPRSPYSAASTSQVPQPPPPPPPLSHPESLHRSSFSSPRQPYATPQNKTNLTTLHPLKTTHSPTTNSARPNAPYPYPPPAASYEALPPPPSASMSHYSYPQYSPKYPLSAPPQSAPNPTYSPSTTTYSAPPRYPPPSSWHDGSDMARLEEKKIGRSSLAPYGESVKRHLESFDLEASLNEMADGSGRIADFSKTYRLRAYDNQRIGMTPQ…	1217	135.829	7.685	66.81	-0.642	0(N)	Cytoplasm|Nucleus	2	PF00320;PF03074	GATA zinc finger;Glutamate-cysteine ligase	CHSCNRAETPEWRRGPDGARTLCNACGLHYAKL;IHMDAMAFGMGSCCLQITFQAKNIEEGRKMYDQLTPLGPILLALTAATPIYKGFLADTDVRWNQISRAVDDRTPEELGEKPLKNDRWRLPKSRYASNSTYISQDPRLRKEYLDPDLIVDEDLKQRLVQGGMDDLLATHFAHLFIRDPIVVFNEDLKELDLSKADHFENLQSTNWQHMRFKPPPPGSDIGWRVEFRPMEIQITDFENAAFSIFIVLITRAILSFNLNFYLPITRVSENMETAHIRDAVSTQKFWFRKNPFSTSSAPGTCTPLAPSLAPTPTPTPTPSGPVADEYEQMSINQVINGQGSPDGTAFPGLIPLVESYLNSVNVDVETRCDIATYLDLIRKRANGTYWTAAKWIRHFVAR…	488;810	520;1199	5.3e-10;1.9e-169	1	CHSCNRAETPEWRRGPDGARTLCNAC	Type IVb
212	EnsemblFungi	Ascomycota	Dothideomycetes	Pleosporales	Ampelomyces quisqualis str. HMLAC05119	Aqui4	KAF1919664	MAESLRRLNQAHDHHHASRKATPSHAQQPAQPSTEAQPEIYHSLEDAKPILIGPATPATSPASPLPPSSVTGASAPISGQVCSNCRTTQTPLWRRSPTGETICNACGLYLKARNQHRPVNLKRNTSTQPNVQVQQAPTPCQENKERTSPENVAACPKVATYVAADQMAAGTCPGGGRCNGTGGQQGCSGCPAFNNRVSKTAKFVLAQANAASNSNTPDSAGGSNAAPGPSPGGASTGAIPACQNCGTTITPLWRRDDAGNIICNACGLYFKLHNTHRPVAMKKQEIKRRKRIVPAGDGGSQAAPSVANYSPPQRASQTPAFEHSASPDSSAAIESREEYMPEPKGPLAIDFTHYYGGNAAANLHPGDLPTPSNATPNAPSLRKRSRSVTSLDCEEARSV…	479	50.7028	8.835	57.43	-0.732	0(N)	Nucleus	2	PF00320;PF00320	GATA zinc finger;GATA zinc finger	CSNCRTTQTPLWRRSPTGETICNACGLYLKARN;CQNCGTTITPLWRRDDAGNIICNACGLYFKLHNT	82;242	114;275	2.1e-10;2.3e-12	2	CSNCRTTQTPLWRRSPTGETICNAC;CQNCGTTITPLWRRDDAGNIICNAC	Type IVa;Type IVa
213	EnsemblFungi	Ascomycota	Dothideomycetes	Pleosporales	Ampelomyces quisqualis str. HMLAC05119	Aqui5	KAF1920403	MNGNGYPYPMRSFPSSRPNMMDNIEAGMGAMDDMNQGQSLDQIVSQNDKAENIRRRSMPVYANNTGRSQPVEMSPESRRLSMLNFGDAGGADDYQFDMQAAGMEDMMRNNPSFPRAPADMQHGSNSANDLALNTRFQDQNSPFSTMAAPGSAYASPLHPNAQLDLDMGSFSNGMSMAMDMDDPMNMMPNDMNLFSNNQFNSPMMDSPVNQEFIGPMPAPGHDKHISSLQAQDHFKRPSLSNTPEARSGASGMPSRSSSQDQSSMRSNSRPHSDKHSSSKSTLPTQISLASLKKQQPISLDPGPGLPQGKSNQIEDFKLPWNPPPGGFPSTMHSNPHMKSQFKNAYSSTGFDMLGVLMRVATRPDPQIDIGSVDLSCAFVVCDAEMDDIPIVYCSENFER…	1069	117.88	8.706	59.24	-0.686	0(N)	Nucleus	3	PF13426;PF08447;PF00320	PAS domain;PAS fold;GATA zinc finger	AFVVCDAEMDDIPIVYCSENFERLTGYTRHMILGRNCRFLQSPDGKVESGIKRKYVDDDSVLYLKNMVNTRAEAQISLINYRRGGQPFMNLLTMIPIAWEPGGPMKFFVGFQVDL;LYLSPSSSRILEYEPSELIGTALSSVCHPSDIVPVTRELKETTNGGSVNVVFRIRRKKSGYMWFEGHGSLHTEQGK;CANCHTRTTPEWRRGPSGNRDLCNSCGLRWAKQ	377;583;939	491;658;971	4.7e-12;1.8e-08;3.6e-11	1	CANCHTRTTPEWRRGPSGNRDLCNSC	Type IVb
214	EnsemblFungi	Ascomycota	Dothideomycetes	Pleosporales	Ascochyta rabiei str. ArDII	Arab1	KZM18813	MDFDQLRESSPAPSPGRVLEEPIFPAFGNDASAVSPESPTELQKNDPLGTQIWKLYSRAKTQLPNAERMSNLTWRMMALNMRRAELERNKGPSSSPQSHEFTSPPPPTSRPLPRTAPSGIAQQLRRSADQQAHAQAQAHSHSHSHSHSHSQPQPQPQPQPQPQPQPSQPPQDTMNLDDFIFPSSVGSPAGLSPEPSNGAEGPLHAGSGVPIRKANQLHDHNLSLAHASAPPVPPQINRENEFGYVARHVRKTSIDERRPPKRRAEASPQLPPANSIMIPTDPQAEADLNHYSLDQTMQPPAFPASQAQVPFSIDTFQMHEDPAVSSAGPFQQSFGFSPVGSPMMNHAASFPNIFNQNSMASSLNSTDYYSPPSSAFPSAVSTPQPMNDDNHVYFDRHGM…	873	93.4732	7.846	49.74	-0.756	0(N)	Nucleus	2	PF08550;PF00320	Nitrogen regulatory protein areA, GATA-like domain;GATA zinc finger	IWKLYSRAKTQLPNAERMSNLTWRMMA;CTNCFTQTTPLWRRNPEGAPLCNACGLFLKLHGV	52;658	78;691	7.5e-08;5.3e-13	1	CTNCFTQTTPLWRRNPEGAPLCNAC	Type IVa
215	EnsemblFungi	Ascomycota	Dothideomycetes	Pleosporales	Ascochyta rabiei str. ArDII	Arab2	KZM20221	MYQNGGAEMSGYPSAVNQTQTQAQAHVQAQTQAQAQGQAQAQALSNTALSHTTLSHTAPQSLGAIDGFNGLQVPLMDGLSMDMDMDMDMDMDMDMDMALGTDTGSINNDGYAPYMLQPQGANSNSNSNNNNNNNNSNSNSNMVLAHDSGLTGAGAGPLPTGFGAPNMNPSGSTLTEFTKRRNWSQRVLEELRDLLHILTPNGRILYVSPSCKALTGWDPAQLMGRFINEFIHPEDIGIFVKEFNESIASGNSLRFFYRFRKSDDSWAIFESHGHPHLSSDPSSFAPPNALNCRGFFIMARPYPTKNAALLDSFLEHKIENERLTKRIAELKREEQDEHDDWAKKTTESQSGAPTESVITQSLNPSDAASYAQMPPPAKPSISNTALTRQNLDEVLAANR…	539	58.7075	5.55	62.04	-0.694	0(N)	Nucleus	2	PF08447;PF00320	PAS fold;GATA zinc finger	ILYVSPSCKALTGWDPAQLMGRFINEFIHPEDIGIFVKEFNESIASGNSLRFFYRFRKSDDSWAIFESHGHPHLS;CTDCGTLDSPEWRKGPNGPKTLCNACGLRWAKKEKK	204;478	278;513	1.9e-09;1.8e-11	1	CTDCGTLDSPEWRKGPNGPKTLCNAC	Type IVb
216	EnsemblFungi	Ascomycota	Dothideomycetes	Pleosporales	Ascochyta rabiei str. ArDII	Arab3	KZM20848	MANPLHPYPGPSHSHTQHQSPPANALPGSLAGLLSPPDSRRTSGDDKDVHRPAPRQSLPSISEALGAEQSLPYPGPVPPPPSVAASTPQHYLPASTNPSPSDPRKRPFEPDSYNAQGPVNPFLHPRSPFISTSTSQVPAPPPPPPQGQPDSMSRPSFDPRQPHLAPQHNSRLPSLHPIKTAQSPPPSAVRPNPPYSSYPPAPSSAYEPPAAQLAEPMNHQYGYPPYASYPLSASAPTAYPPPASTYSAPSRYYPTSLRDNTEARMEEKKLNRASLAPYGESVKRHLDSFDLEASLNEMADGCGRISEFSKVYRQRAHEDQRIGMTPQSIPRLEDIEDMIKQGERVQMSLQRMRDVVFNHHQATIAEPPREAHYRRANGYEHDTSSSYGDDMKSGGGFAG…	474	51.6918	9.115	48.52	-0.956	0(N)	Nucleus	1	PF00320	GATA zinc finger	CHSCNRAETPEWRRGPDGARTLCNACGLHYAKL	416	448	1.7e-10	1	CHSCNRAETPEWRRGPDGARTLCNAC	Type IVb
217	EnsemblFungi	Ascomycota	Dothideomycetes	Pleosporales	Ascochyta rabiei str. ArDII	Arab4	KZM25020	MNRYPYASHAYADASSNSAGLMNLGGGDVGAYGVAAVEAVEGRSLDDIVSQNDKAHRRQSMPVYMHQQPRQPQYQHHQHHQHHQHHQHHQHHQHQQHQHQHQHPPLMHMTSPTRSLSMMSFGDPNGGPVDDFAFDVSAAARMDNMMPNTTFPRPSPDPHSDRMSAADLAFKTQFSTAASPYSTMAAPSSNYASPMHTNTDLDMTMSPYPNALNMPLDMDDSLNAMMPPDMHMFQNDHFHSPMMDSPVNTNHTPINQGTDFIGPLPAPQRGVNVVGQHQVGGTQPQNQHRSQNENQNQNQNQNQNQNQNQNQNQNQNQNQNQNQTQNQNQPQNQNQNQNQNRNRDQNHDQDQNQTQNHDQNQHQHQHQNQNQTQNQHQNQSQHQNQSQHQNQSQNHNHFK…	1220	136.529	8.609	54.84	-0.955	0(N)	Nucleus	3	PF13426;PF08447;PF00320	PAS domain;PAS fold;GATA zinc finger	CAFVVCDADMDDIPIVYCSENFERLTGYTRHMILGRNCRFLQSPDGKVEPGIKRNYVDDDSVLYLKNTISAVTEAQISLINYRRGGQPFMNLLTMIPISWDNGGKVKFFVGFQVDL;MYLSPSSNRILEYDPSELVGTALSSVCHPSDIVPVTRELKETSNGGSVNVVFRIRRKKSGYMWFEGHGSLHTEQGK;CANCHTRTTPEWRRGPSGNRDLCNSCGLRWAKQ	542;749;1098	657;824;1130	3.9e-13;4.8e-08;4.2e-11	1	CANCHTRTTPEWRRGPSGNRDLCNSC	Type IVb
218	EnsemblFungi	Ascomycota	Dothideomycetes	Pleosporales	Ascochyta rabiei str. ArDII	Arab5	KZM25702	MLERASTCLESGGRQLLRAPRPCLPSRRKLHSTFWHHGASDLCLPLWWAISPTSNSGTDQPAASSSDGTPLDFLYPEKSLALLRKLSVRGEIVSEARRRQLQPSTARTFVTIRRVKPMVGIAELETREEVVDPAEAKDAQREMHERLQCSSAHDALAELLRRLEPGKQELAWQLYLALSDKGPSAVTSALRLTLLEYLVADNEPAVPTRVIKIFNAIPETSRTASAYRAAVIACVALRETGTAINLHREAAREGRFVAREDDVVDIGTDVLLRRLVADEQWELALRVFRAYITEHRFSINGQRTLYRIRWGEATLPEIWTEASQLPEIKEHVQSLLLYVRQHKDELISTPRRRAVLYTFVQSFLPHVMDRVLHVRKPNEDNIWDWFTKLFDDLHAHNLP…	1534	172.718	8.897	82.78	-0.444	0(N)	Mitochondrion	2	PF00320;PF25026	GATA zinc finger;Asd-4-like domain	CQNCTTSTTPLWRRDESGAVLCNACGLFLKLHGR;SYDSLAAQNTALKTRVSEMELINDLFRNRVSELESSEGQARATEHALRAELEATQQREQALKRRIEEIEEE	1275;1437	1308;1507	7.2e-11;1.2e-19	1	CQNCTTSTTPLWRRDESGAVLCNAC	Type IVa
219	EnsemblFungi	Ascomycota	Dothideomycetes	Pleosporales	Ascochyta rabiei str. ArDII	Arab6	KZM25952	MAHPSGSGGTSLAPTPTHPHHLSRESSREELEMAESLRRLNQVQDTHMSNTGSPLREQQQSSTPQDDQKSEIYHSLEDAVPIAGASASPAPSTSLSLPPPSAGGSSAPIIGQVCRTTQTPLWRRSPTGETVCNACGLYIKARNQQRPVNLKRNPPSQPTVSSQQSPTSNASANREVSPGNLAASPQVATYVAADQMAAGTCPGGGRCNGTGGQQGCSGCPAFNNRVSKTAKFALQQANASPKSADGTNENSTLGPCSGSASTNAIPACQNCGTTITPLWRRDDAGHIICNACGLYYKLHGAHRPVAMKKQEIKRRKRVVPAGETGSQAAPSVANYSPPQRTSQTPVLDGSTSPDPIESREQYTPEPRGPLAVDFTHYHNNNINNHLSVTSNPNPAAPSP…	498	53.016	8.795	57.91	-0.801	0(N)	Cytoplasm|Nucleus	2	PF00320;PF00320	GATA zinc finger;GATA zinc finger	CRTTQTPLWRRSPTGETVCNACGLYIKARN;CQNCGTTITPLWRRDDAGHIICNACGLYYKLHG	114;268	143;300	4.4e-09;2.1e-12	2	CRTTQTPLWRRSPTGETVCNAC;CQNCGTTITPLWRRDDAGHIICNAC	Type IVp;Type IVa
220	EnsemblFungi	Ascomycota	Dothideomycetes	Pleosporales	Bimuria novae-zelandiae CBS 107.79	Bnov1	KAF1964637	MVNSSGSGGTSLAPTPTHPHHLSREPSREDVEMAEQLRQLNQVQDTRVSRVPSPSQAQQSATPPLTHASEIYHSLDDSRPLRESEQLVQPSMPTTPASHPQSNPASGNALITGQVCHNCGTTKTPLWRRSPAGETICNACGLYQKARNQSRPTNLKRNTTAQPIVPIPQSPVPGQNHDRNTSPGGAAVAPRPATYVASDHEAAGTCPGGGRCNGMGGQQGCGGCPAFNNRVSKTAQFALAQTGGNASTTDSSRGASMATSAIPACQNCGTTITPLWRRDEVGHTICNACGLYYKLHGSHRPVEMKKQEIKRRKRIIPADGTSTQVPSIPNYSPQPRATQTPAFEHSVSPDPSTAIESSELPPGLRAPVPVDFTNYQGNAAHLGPPSPSASYVGAPSPRK…	490	52.2163	8.698	58.45	-0.741	0(N)	Nucleus	2	PF00320;PF00320	GATA zinc finger;GATA zinc finger	CHNCGTTKTPLWRRSPAGETICNACGLYQKARN;CQNCGTTITPLWRRDEVGHTICNACGLYYKLHGS	116;265	148;298	3.2e-11;2.6e-12	2	CHNCGTTKTPLWRRSPAGETICNAC;CQNCGTTITPLWRRDEVGHTICNAC	Type IVa;Type IVa
221	EnsemblFungi	Ascomycota	Dothideomycetes	Pleosporales	Bimuria novae-zelandiae CBS 107.79	Bnov2	KAF1966759	MNEYPYPPRRPFSQQQSNATPIMDMAGDTLDAAASFDMGQHGQSLDDIVSSNDKANRRSSMPVYQGNPMAMDSPDSRRFSSMNFGTPGSQAMVDFQFDMSAAGMDGMLPTTTFPRTSGELQNDRISAADLAINTQFSQANANSPFSTVANGGSAYASPLQPNGSLDMDMSPYPPMPLDMNDPMSMMPNDMNMFPSSAFGSAIMGSPTAQDFAAGPQASTPQDRSMGMQSRESYRRDSSSTTPNVRANMPARTPSHDQKPVHSEPRSQSDNGSTPHHPSQDASSMSKASLENQRPIQLYPGRQLSQQGYEAAAYAKNSVPWMTPLGGLPSTKDKNPHMKTQFKNAYSSTGFDMLGVLMRVATRPNPQIDIGSVDLSCAFVVCDAEMDDIPIVYCSENFER…	1065	117.43	8.513	61.64	-0.671	0(N)	Nucleus	3	PF13426;PF08447;PF00320	PAS domain;PAS fold;GATA zinc finger	AFVVCDAEMDDIPIVYCSENFERLTGYSKHMILGRNCRFLQSPDGKVEPGIKRTYVDDDSILYLKNTINDRIEAQISLINYRRGGQPFMNLLTMIPIAWEPGGNIKFFVGFQVDL;LYLSPSSNQVLEYDPSELVGTALSSVCHPSDIVPVTRELKETSNGASVNVVFRIRRKKSGYMWFEGHGSLHTEQGK;CANCHTRQTPEWRRGPSGNRDLCNSCGLRWAKQ	377;583;931	491;658;963	5.9e-12;3.9e-07;3.2e-11	1	CANCHTRQTPEWRRGPSGNRDLCNSC	Type IVb
222	EnsemblFungi	Ascomycota	Dothideomycetes	Pleosporales	Bimuria novae-zelandiae CBS 107.79	Bnov3	KAF1967878	METLDSRHSIGLPSISNMDQTKREEMDYQRKHSASAAPMNPLHPFSHHNHHNHQSSSASALPAPLGGLLSPPESRRTSDEEGAQRAPARQSLPSIQEALGGSEQPHAFSAPPLDPLAGPTSTPQSYFPSSTTSPTDQRTKTFSTDNHGSQGPSNPFAQTRSPFMGSSTTAGPPPPPPPAPLDPLSRSSFSEHQPSFSEPRHSFSASQPNSKFPSLHPIRTNPSPPPPPGRPSHSYDSYPPQSTATYEPAAPHSAGPMNHNYGYQQQYPTTYPLSAPTQGAPNPYPPPAATYAVPPRPFAGQWDGRPDEKKLNRASLAPYGESVKRHLESFDLEASLNEIAEGTGRMSDFSKVYRQRAHETQRIGMTPQSMPRLEEVDEMLKHSERVQMSLQRMREVVFN…	514	56.0162	8.875	40.76	-1.014	0(N)	Nucleus	1	PF00320	GATA zinc finger	CHSCNRAETPEWRRGPDGARTLCNACGLHYAKL	455	487	1.9e-10	1	CHSCNRAETPEWRRGPDGARTLCNAC	Type IVb
223	EnsemblFungi	Ascomycota	Dothideomycetes	Pleosporales	Bimuria novae-zelandiae CBS 107.79	Bnov4	KAF1968108	MTYATAAPATAGGSANSPPVCQNCTTSTTPLWRRDESGSVLCNACGLFLKLHGRPRPISLKTDVIKSRNRVKTGGPGARKKAGEMNGLPAAHPDTDAFQGLAQHRRASGKISSGFSDRSQSPISRTGTPGFPHPSNIAPQHMFDGALSGDAFHSPSLPNFGFRHPSPGAMSMSNGSHLEAPPPYDTLAAQNTALKTRVSELEVINDLFRGRVAELETSDQATRAREAQLMTELEEVKAREADLKRRLEELEAESPRHKRMRLSDLVDESRAGTPINELTE	280	30.2025	8.72	63.21	-0.643	0(N)	Nucleus	2	PF00320;PF25026	GATA zinc finger;Asd-4-like domain	CQNCTTSTTPLWRRDESGSVLCNACGLFLKLHGR;PYDTLAAQNTALKTRVSELEVINDLFRGRVAELETSDQATRAREAQLMTELEEVKAREADLKRRLEELEAE	21;183	54;253	7.9e-12;1.5e-23	1	CQNCTTSTTPLWRRDESGSVLCNAC	Type IVa
224	EnsemblFungi	Ascomycota	Dothideomycetes	Pleosporales	Bimuria novae-zelandiae CBS 107.79	Bnov5	KAF1973613	MSLDDMMPMDSIDLSQLDDAVSTPQAATFTTSSFPQQQQLLLPQGMQGGSTPGDGYAIQPQESTLTGAGAGPLPTGFGAPSLNPSGSTLTEFTKRRNWSQRVLEELRDFLHILTPDGRILYCSPSVKALTGWEPQQLIGRFVGEFIHPDDSGIFVKEFNESIASGNPLRFFYRFRKMDETWIIFEAHGHPHLSNDQSAFVPPNTMNCRGFFMMSRPYPTKNAALLDSFLEHKIESERLKKRIAELKREEQEEMEAQDQHWQKKTDGVSSMTLSETQGQTDSVSVSASAIAAYNAMPPPAIPSVSNTALTRQNLDEALAASKPDSINDKMARYEGTTHLETIEMLTGLRYRDGERSQGISTGEHSPMLIRGDAGIQISLDRDGRTSSDKKKKIKIADEYV…	460	50.8004	5.829	63.48	-0.638	0(N)	Nucleus	2	PF08447;PF00320	PAS fold;GATA zinc finger	ILYCSPSVKALTGWEPQQLIGRFVGEFIHPDDSGIFVKEFNESIASGNPLRFFYRFRKMDETWIIFEAHGHPHLSN;CTDCGTLDSPEWRKGPSGPKTLCNACGLRWAKKEKK	119;400	194;435	1.3e-10;2.1e-11	1	CTDCGTLDSPEWRKGPSGPKTLCNAC	Type IVb
225	EnsemblFungi	Ascomycota	Dothideomycetes	Pleosporales	Bimuria novae-zelandiae CBS 107.79	Bnov6	KAF1978050	MATSPHTPLDGPPQQTQQHQQEHQQQLQSPYSPARSSTTLESPLHLSPRDAAARQGVLATSMFPNLKHGDEPMESPEEMQRNDPLGTQIWKLYSKARTQLPNAERMENLTWRMMAMKMRGSSSNNNNNRGYEAAQRARANAPGDAAPAAAGNACSSSQQQTRPAPMAAPPRPALTSAPSGIAQQLRRSVNLQAAHAPPPPPPPPPPPACADHNAMNIDDFIQPSSVGSPAGLPPSPSNETRPSPTANATPPAIPIRKANQHHDPDLSLAHASAPPVPPQLHRDRENEFGYIQRRVRKTSIDERRPPKRRAEASPLVPPVNNTMIPSNPDDEAALHHYSLDHHALQPPAFSTPQPHVPFSIDTSSFGLQEDPIISSAGPFQQQFGFSPVGSPLMSQSASY…	931	98.8461	8.718	49.61	-0.781	0(N)	Nucleus	2	PF08550;PF00320	Nitrogen regulatory protein areA, GATA-like domain;GATA zinc finger	IWKLYSKARTQLPNAERMENLTWRMMAM;CTNCFTQTTPLWRRNPEGHPLCNACGLFLKLHGV	89;709	116;742	2.8e-09;7.3e-13	1	CTNCFTQTTPLWRRNPEGHPLCNAC	Type IVa
226	EnsemblFungi	Ascomycota	Dothideomycetes	Pleosporales	Bipolaris maydis ATCC 48331	Bmay1	ENI02032	MSLATCTSQSWAEHVTQYLADFLHVLSPEGQLVYISPSCSSITGYEPADLLGCFIGDLVHPDDNVLMTEFFGTIFFAKTTRVIYRFLKKDKTWLVLESSFTPSTKTPICRTESNPLARFRPHVVVLARPYLTKHNMILDSFLEHAVLYQKLQQQIRCLKSEERPDEAEALINAQNEPSFSVHQGVISEVNQSPQIDCNIFVESLAGPGSERTVVGDLGIPILATSTRGHERPASSMRRRKRPEAEDPLICHSCATVKSPEWRRGPDGPKTLCNACGLRWSKVIGATMKQKADIPRKRK	298	33.398	8.496	82.45	-0.295	0(N)	Nucleus	2	PF08447;PF00320	PAS fold;GATA zinc finger	VYISPSCSSITGYEPADLLGCFIGDLVHPDDNVLMTEFFGTIFFAKTTRVIYRFLKKDKTWLVLESSFTPS;CHSCATVKSPEWRRGPDGPKTLCNACGLRWSK	33;250	103;281	1.2e-06;5.5e-11	1	CHSCATVKSPEWRRGPDGPKTLCNAC	Type IVb
227	EnsemblFungi	Ascomycota	Dothideomycetes	Pleosporales	Bipolaris maydis ATCC 48331	Bmay2	ENI02095	MTYATSAPATAGGQAGSPPVCQNCSTSTTPLWRRDETGAVLCNACGLFLKLHGRPRPISLKTDVIKSRNRVKTGGLGGRKRTSDQGGLPAAHPDADGQLALAQHRRASGKMSSGLSDRSQSPISRTGTPNFNHPSNIAPQHMFEQALHGDFHSPSLPGFGLRAPSPATSSVNGSHLEAPLPYETLAAQNTALKTRVSEMELINDLFRNRVSELEQSEQSARQTESTLRKELEEVKQREADLKRRLEEIENESPRHKRMKMSEFVDESRAGTPISAMVD	278	30.2445	9.134	64.32	-0.723	0(N)	Nucleus	2	PF00320;PF25026	GATA zinc finger;Asd-4-like domain	CQNCSTSTTPLWRRDETGAVLCNACGLFLKLHGR;YETLAAQNTALKTRVSEMELINDLFRNRVSELEQSEQSARQTESTLRKELEEVKQREADLKRRLEEIENE	21;182	54;251	8.5e-12;3.3e-22	1	CQNCSTSTTPLWRRDETGAVLCNAC	Type IVa
228	EnsemblFungi	Ascomycota	Dothideomycetes	Pleosporales	Bipolaris maydis ATCC 48331	Bmay3	ENI03851	MMMGLEADAINGFDMSDGQSLDSMVAQNDKESRRRSMPPFARGPQQMNLGSPDTRRLSMMNFGDPNGGDMEDFRFDMSSATMDNLMHANTASFPRSTAAMQTDQLPANDLSIGNQYQGQASPFPQMTAPGSAYASPMHQKTSLDLEMSSYQNGINMSLDMNDSLNMMPPDMNMFPGNQFNSPLLGSPLNQDFVGSIPTAPQDNATPNNNSNANTNTNNNSSSNNTPSTQAQDHFKRPSVNNTPDPKSGRASYLSRALSQDQTTMRSHSRPQSDRHSSSSVPTRMTLASLRNQQPVAQDPAQDLPKDVINKQLRESNVPWPTPAGGFPSTMHQNPHMKTQFKNAYSSTGFDMLAVLMRVATRPDPQIDIGSVDLSCAFVVCDAELDDIPIVYCSENFERL…	1054	116.331	8.687	58.78	-0.72	0(N)	Nucleus	3	PF13426;PF08447;PF00320	PAS domain;PAS fold;GATA zinc finger	AFVVCDAELDDIPIVYCSENFERLTGYTRHMILGRNCRFLQAPDGKVESGIKRNYVDDDSVYYLKNMIENRAEAQISLINYRRGGQPFMNLLTMIPIAWEPGGKTKFFIGFQVDL;LYLSPASNRILEYDPSELVGTALSSVCHPSDIVPVTRELKETTSGASVNVVFRIRRKKSGYMWFEGHGSLHTEQGK;CANCHTRQTPEWRRGPSGNRDLCNSCGLRWAKQ	376;583;934	490;658;966	2.5e-12;2.1e-07;3.2e-11	1	CANCHTRQTPEWRRGPSGNRDLCNSC	Type IVb
229	EnsemblFungi	Ascomycota	Dothideomycetes	Pleosporales	Bipolaris maydis ATCC 48331	Bmay4	ENI04017	MAQFPNGGAEMGLNSMAGIPMHPHRPDLNGLPMDNVMQHMDLDMSSLDGTDGQSSAFAFADPQMQQSALPPNNTMATDMQMTGAGAGPLPTGFGAPNMNPSGSTLTEFTKRRNWSQRVLEELRDLLHILTPDGRILYVSASCKSLTGWEPSHIMGRFINEFIHPDDIGIFVKEFNESIASGNPLRFFYRFRKTDDSWAIFESHGHPHLSSDTNTFAPPNAINCRGFFMMARPYPTKNAALLDSFLEHKIENERLMKRIAELKREEQDEQDEWAKKADGATASMTASESHVTQNMSQADAASYAQMPPPAKPVVSNTALTRQNLDEALAASKPDSINDKMARYEGANHLETIEMLTGLRYRDGERSQGISTGDASPNLIRGDAGIQISLDRDGRNSSEKK…	475	52.1671	5.984	59.49	-0.648	0(N)	Nucleus	2	PF08447;PF00320	PAS fold;GATA zinc finger	ILYVSASCKSLTGWEPSHIMGRFINEFIHPDDIGIFVKEFNESIASGNPLRFFYRFRKTDDSWAIFESHGHPHLSSD;CTDCGTLDSPEWRKGPNGPKTLCNACGLRWAKKEKK	135;410	211;445	2.4e-09;1.5e-11	1	CTDCGTLDSPEWRKGPNGPKTLCNAC	Type IVb
230	EnsemblFungi	Ascomycota	Dothideomycetes	Pleosporales	Bipolaris maydis ATCC 48331	Bmay5	ENI05356	MEISPSQDSARRGVLQDAIFPAFGNDAGSPGAESPEQMQKNDPLGTQIWKLYSRAKTQLPNAERMENLTWRMMAMNMRRADMDRNKGPPPRSAPSGIAQQLRKSQDQQAQVHQPAQDAMNLDDFIFPSSVGSPAGLSPPGSNEDAAPFIATAPAIPIRKPHLASDHNLSLARASAPSVPPAISKEDEFGYVPRHVRKTSIDERRPPKRRAEASPLVPPVNSIMIPTDAHSEADLHQYSLDNTTMQPPTFPASQGQGAFSLDTFQMHEDATVHSAGPYQQSFSGFSPVGSPLMSHNAFNSNMFNHNSMASSLNSTDYYSPPSSAFPSTVSTPQPISEDSQMYFDRSGMDIRTSQHGASYGPHRPSNLSTSMQPQYIFNPGAGGQDSVFSPVTSASSSLPF…	824	88.0863	8.222	49.59	-0.737	0(N)	Nucleus	2	PF08550;PF00320	Nitrogen regulatory protein areA, GATA-like domain;GATA zinc finger	IWKLYSRAKTQLPNAERMENLTWRMMAM;CTNCFTQTTPLWRRNPEGHPLCNACGLFLKLHGV	48;606	75;639	2.9e-09;6.3e-13	1	CTNCFTQTTPLWRRNPEGHPLCNAC	Type IVa
231	EnsemblFungi	Ascomycota	Dothideomycetes	Pleosporales	Bipolaris maydis ATCC 48331	Bmay6	ENI06272	MAHPSGSGGTSFAPTPTHPHHLSRETSRDELEMAESLRLLNQTHDHQKPRAEATSQEQQQQQQQQQQQQQQQQQQQQQQHAQEDPRSEIYHSLEDAVPIADGPPTPSTAASLQIPNMNYETPNASITGQVCSNCKTTQTPLWRRSPAGETVCNACGLYMKARNQSRPVNLKRNTQTQPTMSVQQSPTPGSTDGSRTCAGNVAGSPRVATYVAADQMAAGTCPGGGRCNGTGGQQGCSGCPAFNNRVSKTAKFALAQANAAPGENRGGSDAASSTSAASASTSAIPACQNCGTTITPLWRRDDAGHIICNACGLYYKLHGTHRPVAMKKQEIKRRKRIVPAADTSSQAPSSVANYSPPQRPSQTPAFEHSVSPDPSTALESREAYTPEPPRGPIAVDFTH…	520	55.9661	8.192	52.67	-0.871	0(N)	Nucleus	2	PF00320;PF00320	GATA zinc finger;GATA zinc finger	CSNCKTTQTPLWRRSPAGETVCNACGLYMKARN;CQNCGTTITPLWRRDDAGHIICNACGLYYKLHGT	131;287	163;320	2.9e-11;1.4e-12	2	CSNCKTTQTPLWRRSPAGETVCNAC;CQNCGTTITPLWRRDDAGHIICNAC	Type IVa;Type IVa
232	EnsemblFungi	Ascomycota	Dothideomycetes	Pleosporales	Bipolaris maydis ATCC 48331	Bmay7	ENI09095	METLDAGSRQAVGLPSINHMDAERVKREEVEYQRKHSAPAMPSPLHPYTGPSHAHSNPQSSIPSAVPGSLGGLLSPPGSRRMSGDDKDSQRAPARQSLPSIHEALGSEQPLSYPATVPPPSSITSAPQHYHSSSAAPSPAEQRPRNYPPDLQHPTQGPHGSLSHPRSPYIASSASQTAPPPPAPAPTDSLPRPPFSDPRPPYPTPQHNPKLPSLHPLKTAPASPPSAPHPSIPYSSYPPPVSKPYESPAPRSAPPMSQHHPYSQYPPSYAVSASSTSAPNPTYPPATSTYSAPPRYAHQAWQDSAEMARLEEKKIGRSSLAPYGESVKRHLESFDIEASLNEMADGSGRIAEFSKIYRQRAHDNQRIGMTPQSMPRLEEVDEMLKQSERIQMSLQRMRD…	1163	129.526	6.439	66.42	-0.677	0(N)	Nucleus	2	PF00320;PF03074	GATA zinc finger;Glutamate-cysteine ligase	CHSCNRAETPEWRRGPDGARTLCNACGLR;IHMDAMAFGMGSCCLQITFQAKNIEEGRTMYDQLSPIAPILLALTAATPIYKGFLADTDVRWNQISRAVDDRTPEELGEKPLKNDRWRLPKSRYASNSTYIAQDPRLRPEYLDPNLIIDPDLKKRLVEGGMDDLLATHFAHLFIRDPIVVFAEDLEELDLTKADHFENLQSTNWQHMRFKPPPAGSDMGWRVEFRPMEIQITDFENAAFSIFIVLLTRAILSFNLNFYIPITLVSENMETAHIRDAVSTQKFWFRKDPFPTHKASNGTGTSTPAENPSRPVTPTGPVEDEYEKMTINEVINGQQTSSGEAGFPGLIPLVESYLNSMNVDVETRCDLATYLDLIRKRANGTYWTAAKWIRHFVQSHPSYN…	460;757	488;1145	1.2e-08;2.5e-173	1	CHSCNRAETPEWRRGPDGARTLCNAC	Type IVb
233	EnsemblFungi	Ascomycota	Dothideomycetes	Pleosporales	Bipolaris oryzae ATCC 44560	Bory1	EUC42966	MAHPSGSGGTSFAPTPTHPHQLSRETSRDELEMAESLRLLNQTHEHQKPRAESTSQEQQQQQQQQQQQQEQQHTNAQEDQRSEIYHSLEDAVPIADGPPTPSTAASLQIPSVNYETPNASITGQICSNCKTTQTPLWRRSPAGETVCNACGLYMKARNQSRPVNLKRNTQTQPNMSVQQSPTPASTDGGRTCAGNVAGSPRVATYVAADQMAAGTCPGGGRCNGTGGQQGCSGCPAFNNRVSKTAKFALAQANAAPGENRGGSDAASSTSASASTSAIPACQNCGTTITPLWRRDDAGHIICNACGLYYKLHGTHRPVAMKKQEIKRRKRIVPAADTGSQAASSVANYSPPQRPSQTPAFEHSVSPDPSTALESREDYTPEPYRGPIAVDFTHYYSNSS…	514	55.2902	7.571	53.09	-0.873	0(N)	Nucleus	2	PF00320;PF00320	GATA zinc finger;GATA zinc finger	CSNCKTTQTPLWRRSPAGETVCNACGLYMKARN;CQNCGTTITPLWRRDDAGHIICNACGLYYKLHGT	126;281	158;314	2.9e-11;1.4e-12	2	CSNCKTTQTPLWRRSPAGETVCNAC;CQNCGTTITPLWRRDDAGHIICNAC	Type IVa;Type IVa
234	EnsemblFungi	Ascomycota	Dothideomycetes	Pleosporales	Bipolaris oryzae ATCC 44560	Bory2	EUC43371	MTYATSAPATAGGQAGSPPVCQNCSTSTTPLWRRDETGAVLCNACGLFLKLHGRPRPISLKTDVIKSRNRVKTGGLGGRKRTSDQGGLPAAHPDADGQLALAQHRRASGKMSSGLSDRSQSPISRTGTPNFNHPSNIAPQHMFEQALHGDFHSPSLPGFGLRAPSPATSSVNGSHLEAPLPYETLAAQNTALKTRVSEMELINDLFRNRVSELEQSEQSARQTESTLRKELEEVKQREADLKRRLEEIESESPRHKRMKMSEFVDESRAGTPISAMVD	278	30.2175	9.134	64.32	-0.713	0(N)	Nucleus	2	PF00320;PF25026	GATA zinc finger;Asd-4-like domain	CQNCSTSTTPLWRRDETGAVLCNACGLFLKLHGR;YETLAAQNTALKTRVSEMELINDLFRNRVSELEQSEQSARQTESTLRKELEEVKQREADLKRRLEEIESE	21;182	54;251	8.5e-12;2.8e-22	1	CQNCSTSTTPLWRRDETGAVLCNAC	Type IVa
235	EnsemblFungi	Ascomycota	Dothideomycetes	Pleosporales	Bipolaris oryzae ATCC 44560	Bory3	EUC46021	MHPHRPDLSGLPMDNVMQHMDLDMSSLDGTDGQSSAFAFADPQMQQSAVPPNNTMATDMQMTGAGAGPLPTGFGAPNMNPSGSTLTEFTKRRNWSQRVLEELRDLLHILTPDGRILYVSASCKSLTGWEPSHIMGRFINEFIHPDDIGIFVKEFNESIASGNPLRFFYRFRKTDDSWVIFESHGHPHLSSDTNTFAPPNSINCRGFFMMARPYPTKNAALLDSFLEHKIENERLMKRIAELKREEQDEQDDWAKKADGATTSMTPSESHVTQNMSQADAVSYAQMPPPAKPVVSNTALTRQNLDEALAASKPDSINDKMARYEGANHLETIEMLTGLRYRDGERSQGISTGDASPNLIRGDAGIQISLDRDGRNSSEKKKKLKIADEYVCTDCGTLDSP…	455	50.2649	6.075	59.69	-0.683	0(N)	Nucleus	2	PF08447;PF00320	PAS fold;GATA zinc finger	ILYVSASCKSLTGWEPSHIMGRFINEFIHPDDIGIFVKEFNESIASGNPLRFFYRFRKTDDSWVIFESHGHPHLSSD;CTDCGTLDSPEWRKGPNGPKTLCNACGLRWAKKEKK	115;390	191;425	5.2e-10;1.4e-11	1	CTDCGTLDSPEWRKGPNGPKTLCNAC	Type IVb
236	EnsemblFungi	Ascomycota	Dothideomycetes	Pleosporales	Bipolaris oryzae ATCC 44560	Bory4	EUC48234	MEISPSQDSARRGVLQDAIFPAFGNDAGSPGAESPEQMQKNDPLGTQIWKLYSRAKTQLPNAERMENLTWRMMAMNMRRADMDRNKGPPPRSAPSGIAQQLRKSQDQQAQVHQPAQDAMNLDDFIFPSSVGSPAGLSPPGSNEDAAPFIATAPAIPIRKPHLASDHNLSLARASAPSVPPAISKEDEFGYVPRHVRKTSIDERRPPKRRAEASPLVPPVNSIMIPTDAHSEADLHQYSLDNNTMQPPTFPASQGQGAFSLDTFQMHEDPAVHSAGPYQQSFSGFSPVGSPLMSHNAFNSNMFNHNSMASSLNSTDYYSPPSSAFPSTVSTPQPISEDSQMYFDRSGMDIRTSQHGASYGPHRPSNLSTSMQPQYIFNPGAGGQDSVFSPVTSASSSLPF…	824	88.1194	7.823	49.71	-0.74	0(N)	Nucleus	2	PF08550;PF00320	Nitrogen regulatory protein areA, GATA-like domain;GATA zinc finger	IWKLYSRAKTQLPNAERMENLTWRMMAM;CTNCFTQTTPLWRRNPEGHPLCNACGLFLKLHGV	48;606	75;639	2.9e-09;6.3e-13	1	CTNCFTQTTPLWRRNPEGHPLCNAC	Type IVa
237	EnsemblFungi	Ascomycota	Dothideomycetes	Pleosporales	Bipolaris oryzae ATCC 44560	Bory5	EUC48480	MMMGLEADGMNGFDMSEGQSLDSMVAQNDKENRRRSMPPFARGPQQMNLGSPETRRLSMMNFGDPNGGDMEDFRFDMSSATMDNLMHSSTASFPRSTAAMQNDQLPATDLSITNQYQGQASPFPQMTAPGSAYASPMHQKTPLDLEMSSYQNGINMSLDMNDSLNMMPSDMNMFPGNQFNSPLLGSPLNQDFVGPIPTAPQDNANPNNNSNANANTNNNNSSNNTPSTQAQDHFKRPSVNNTSDPKSGRSSYLSRALSQDQASMRSHSRPQSDRHSSNSVPTRMTLASLRNQQPVAQDPAQDLPKDVINKQLRESNVPWQTPAGGFPSTMHQNPHMKTQFKNAYSSTGFDMLAVLMRVATRPDPQIDIGSVDLSCAFVVCDAELDDIPIVYCSENFERL…	1054	116.509	8.608	58.49	-0.733	0(N)	Nucleus	3	PF13426;PF08447;PF00320	PAS domain;PAS fold;GATA zinc finger	AFVVCDAELDDIPIVYCSENFERLTGYTRHMILGRNCRFLQAPDGKVESGIKRNYVDDDSVYYLKNMIENRAEAQISLINYRRGGQPFMNLLTMIPIAWEPGGKTKFFIGFQVDL;LYLSPASNRILEYDPSELVGTALSSVCHPSDIVPVTRELKETTSGASVNVVFRIRRKKSGYMWFEGHGSLHTEQGK;CANCHTRQTPEWRRGPSGNRDLCNSCGLRWAKQ	376;583;934	490;658;966	2.5e-12;2.1e-07;3.2e-11	1	CANCHTRQTPEWRRGPSGNRDLCNSC	Type IVb
238	EnsemblFungi	Ascomycota	Dothideomycetes	Pleosporales	Bipolaris oryzae ATCC 44560	Bory6	EUC51096	METLDAGSRQAVGLPSINHMDAERVKREEAEYQRKHSAPAMPSPMHPYTGPSHSHSNPQPSIPSAVPGSLGGLLSPPESRRMSGDDKDSQRAPARQSLPSIHEALGSEQPLSYPATVPPPSSITSAPQHYHSSSAAPSPAEQRPRNYPPELQHPSQGPPSSLSHPRSPYIASSASQTGPPPPAPAPTDSLPRPPFSDPRPPYSTPQHNPKLPSLHPLKTAPASPPSAPHPSIPYSSYPPPVSKPYESPAPRSAPPMSQHHPYSQYPPSYAVSASTTSAPNPTYPPATSTYSAPPRYVHQAWQDSAEMARLEEKKIGRSSLAPYGESVKRHLESFDIEASLNEMADGSGRIAEFSKIYRQRAHDNQRIGMTPQSMPRLEEVDEMLKQSERIQMSLQRMRD…	1167	130.197	6.593	65.69	-0.691	0(N)	Cytoplasm	2	PF00320;PF03074	GATA zinc finger;Glutamate-cysteine ligase	CHSCNRAETPEWRRGPDGARTLCNACGLR;IHMDAMAFGMGSCCLQITFQAKNIEEGRTMYDQLSPIAPILLALTAATPIYKGFLADTDVRWNQISRAVDDRTPEELGEKPLKNDRWRLPKSRYASNSTYIAQDPRLRPEYLDPNLIIDPDLKKRLVEGGMDDLLATHFAHLFIRDPIVVFAEDLEELDLTKADHFENLQSTNWQHMRFKPPPAGSDMGWRVEFRPMEIQITDFENAAFSIFIVLLTRAILSFNLNFYIPITLVSENMETAHIRDAVSTQKFWFRKDPFPTHKASNGTGTSSPAENPSRPVTPTGPVEDEYEKMTINEVINGQQSSSGEAGFPGLIPLVESYLNSMNVDVETRCDLATYLDLIRKRANGTYWTAAKWIRHFVQSHPSYN…	460;761	488;1149	9.8e-09;2.2e-173	1	CHSCNRAETPEWRRGPDGARTLCNAC	Type IVb
239	EnsemblFungi	Ascomycota	Dothideomycetes	Pleosporales	Bipolaris sorokiniana ND90Pr	Bsor1	EMD58987	MMEILDAGSRQAVGLPSINHMDAERVKREEAEYQRKHSAPAMPSPLHPYTGPSHAHSNPQSSVPSTVPGSLGGLLSPPESRRMSGDDKDSQRAPARQSLPSIHEALGSEQPLSYPATVPPPSSITSAPQHYHSSSAAPSPAEQRPRNYPPDLQHPSQGPPSSLTHPRSPYIASSASQTGPPPPAPAPTDSLPRPPFSDPRPPYPNPQHNPKLPSLHPLKTAPASPPSAPHPSISYSSYPPPVSKPYESPAPRSAPPISQHHPYSQYPPSYAVSASSTSAPNPTYPPATSTYSAPPRYVHQAWQDSAEMARLEEKKIGRSSLAPYGESVKRHLESFDIEASLNEMADGSGRIAEFSKIYRQRAHDNQRIGMTPQSMPRLEEVDEMLKQSERIQMSLQRMR…	520	56.5322	9.203	48.15	-0.963	0(N)	Nucleus	1	PF00320	GATA zinc finger	CHSCNRAETPEWRRGPDGARTLCNACGLHYAKL	461	493	2e-10	1	CHSCNRAETPEWRRGPDGARTLCNAC	Type IVb
240	EnsemblFungi	Ascomycota	Dothideomycetes	Pleosporales	Bipolaris sorokiniana ND90Pr	Bsor2	EMD59710	MHPHRPDLSGLPMDNVMQHMDLDMSSLDGTDGQSSAFAFADPQMQQSVVPPNNTMATDIQMTGAGAGPLPTGFGAPNMNPSGSTLTEFTKRRNWSQRVLEELRDLLHILTPDGRILYVSASCKSLTGWEPSHIMGHFINEFIHPDDIGIFVKEFNESIASGNPLRFFYRFRKTDDSWVIFESHGHPHLSSDTNTFAPPNAINCRGFFMMARPYPTKNAALLDSFLEHKIENERLMKRIAELKREEQDEQDDWAKKADGATASMTASESHVTQNMSQADAASYAQMPPPAKPVVSNTALTRQNLDEALAASKPDSINDKMARYEGANHLETIEMLTGLRYRDGERSQGISTGDASPNLIRGDAGIQISLDRDGRNSSEKKKKLKIADEYVCTDCGTLDSP…	455	50.1557	6.024	61.21	-0.656	0(N)	Nucleus	2	PF08447;PF00320	PAS fold;GATA zinc finger	ILYVSASCKSLTGWEPSHIMGHFINEFIHPDDIGIFVKEFNESIASGNPLRFFYRFRKTDDSWVIFESHGHPHLSSD;CTDCGTLDSPEWRKGPNGPKTLCNACGLRWAKKEKK	115;390	191;425	8e-10;1.4e-11	1	CTDCGTLDSPEWRKGPNGPKTLCNAC	Type IVb
241	EnsemblFungi	Ascomycota	Dothideomycetes	Pleosporales	Bipolaris sorokiniana ND90Pr	Bsor3	EMD62381	MPFATCTSQNWAEHATQYLADFLHVLSPEGRLVYISPSCSSITGYEPADLLGCFIGDLVHPDDNILITEFFRTIFFTRTTRVIYRFLKKDKTWLVLESSFTPSTQVPICRTESNPSPRFRPHVVVLARPYLTKHKMILDSFLEHIVLYEKLQQQIRDLKNEERRDEAEALTNAQNERPFSVHQGVMSEVSQSSQIDSNNFVESVAGPGSERAVVGDLGIPILATLSRGHERPASSMRRKKRPKNEDPLICHSCATVQSPEWRRGPDGLKTLCNACGLRWSKTIGATMMEKVDTPRKRNEAGND	303	34.2906	8.101	77.85	-0.442	0(N)	Nucleus	2	PF08447;PF00320	PAS fold;GATA zinc finger	VYISPSCSSITGYEPADLLGCFIGDLVHPDDNILITEFFRTIFFTRTTRVIYRFLKKDKTWLVLESSFTP;CHSCATVQSPEWRRGPDGLKTLCNACGLRWSK	33;250	102;281	1.6e-06;8.7e-10	1	CHSCATVQSPEWRRGPDGLKTLCNAC	Type IVb
242	EnsemblFungi	Ascomycota	Dothideomycetes	Pleosporales	Bipolaris sorokiniana ND90Pr	Bsor4	EMD62444	MPSPPSKPSNGLSMTYATSAPATAGGQAGSPPVCQNCSTSTTPLWRRDETGAVLCNACGLFLKLHGRPRPISLKTDVIKSRNRVKTGGLGGRKRTSDQGGLPAAHPDADGQLALAQHRRASGKMSSGLSDRSQSPISRTGTPNFNHPSNIAPQHMFEQALHSDFHSPSLPGFGLRAPSPATSSVNGSHLEAPLPYETLAAQNTALKTRVSEMELINDLFRNRVSELEQSEQSARQTESTLRKELEEVKQREADLKRRLDEIENESPRHKRMKMSEFVDESRAGTPISAMVD	291	31.541	9.271	62.78	-0.732	0(N)	Nucleus	2	PF00320;PF25026	GATA zinc finger;Asd-4-like domain	CQNCSTSTTPLWRRDETGAVLCNACGLFLKLHGR;YETLAAQNTALKTRVSEMELINDLFRNRVSELEQSEQSARQTESTLRKELEEVKQREADLKRRLDEIENE	34;195	67;264	9.1e-12;1.4e-22	1	CQNCSTSTTPLWRRDETGAVLCNAC	Type IVa
243	EnsemblFungi	Ascomycota	Dothideomycetes	Pleosporales	Bipolaris sorokiniana ND90Pr	Bsor5	EMD64177	MEISSSQDSARRGVLQDAIFPAFGNDAGSPGAESPEQMQKNDPLGTQIWKLYSRAKTQLPNAERMENLTWRMMAMNMRRADMDRNKGPSHNTQSNQMMPPPAASSRPPPRSAPSGIAQQLRKSQDQQAQVHQPAQDAMNLDDFIFPSSVGSPAGLSPPGSNEDAAPFIATAPAIPIRKPHLASDHNLSLARASAPSVPPAISKEDEFGYVPRHVRKTSIDERRPPKRRAEASPLVPPVNSIMIPTDAHSEADLHQYSLDNTTMQPPTFPASQGQGAFSIDTFQMHEDPAVHSAGPYQQSFSGFSPVGSPLMSHNAFNSNMFNHNSMASSLNSTDYYSPPSSAFPSTVSTPQPISEDSQMYFDRSGMDIRTSQHGASYGPHRPSNLSTSMQPQYIFNPGA…	843	90.2728	8.179	48.92	-0.745	0(N)	Nucleus	2	PF08550;PF00320	Nitrogen regulatory protein areA, GATA-like domain;GATA zinc finger	IWKLYSRAKTQLPNAERMENLTWRMMAM;CTNCFTQTTPLWRRNPEGHPLCNACGLFLKLHGV	48;625	75;658	3e-09;6.5e-13	1	CTNCFTQTTPLWRRNPEGHPLCNAC	Type IVa
244	EnsemblFungi	Ascomycota	Dothideomycetes	Pleosporales	Bipolaris sorokiniana ND90Pr	Bsor6	EMD68769	MMGLEAGAMNGFDMSDGQSLDSMVTQNDKENRRRSMPPFARGSQQMNLGSPETRRLSMMNFGDPNGGDMEDFRFDMSSTTMDNLMHSNTTSFPRSTAAMQNDQLPATDLSIGNQYQGQASPFPQMTAPSSAYASPMHQKTSLDLEMSSYQNGINMSLDMNDSLNMMPSDMNMFPGNQFNSPLLGSPLNQDFVGPIPTASQDNATPNNNSNANTNTNNGSNNTPSTQAQDHFKHPSLNNTPDPKSGRSSYLSRALSQDQTSIRSHSRPQSDRHSSNSVPTRMTLASLRNQQPIAQDPAQDLPKDVINKQLRESNVPWPTPAGGFPSTMHQNPHMKTQFKNAYSSTGFDMLAVLMRVATRPDPQIDIGSVDLSCAFVVCDAELDDIPIVYCSENFERLTGY…	1051	116.184	8.755	59.76	-0.715	0(N)	Nucleus	3	PF13426;PF08447;PF00320	PAS domain;PAS fold;GATA zinc finger	AFVVCDAELDDIPIVYCSENFERLTGYTRHMILGRNCRFLQAPDGKVESGIKRNYVDDDSVYYLKNMIENRAEAQISLINYRRGGQPFMNLLTMIPIAWEPGGKIKFFIGFQVDL;LYLSPASNRILEYDPSELVGTALSSVCHPSDIVPVTRELKETTSGASVNVVFRIRRKKSGYMWFEGHGSLHTEQGK;CANCHTRQTPEWRRGPSGNRDLCNSCGLRWAKQ	373;580;931	487;655;963	5.8e-13;2.1e-07;3.2e-11	1	CANCHTRQTPEWRRGPSGNRDLCNSC	Type IVb
245	EnsemblFungi	Ascomycota	Dothideomycetes	Pleosporales	Bipolaris sorokiniana ND90Pr	Bsor7	EMD70050	MAHPSGSGGTSFAPTPTHPHQLSRETSRDELDMAESLRLLNQTHEHQKPRVEATSQEQQQQQQQQHTHAQEDQRSEIYHSLEDAVPIADAPPTPSTAASLQIPNMNYETPNASITGQICSNCKTTQTPLWRRSPAGETVCNACGLYMKARNQSRPVNLKRNTQTQPSMSVQQSPTPGSTDGGRTCAGNVAGSPRVATYVAADQMAAGTCPGGGRCNGTGGQQGCSGCPAFNNRVSKTAKFALAQANAAPGENRGGSDAASSTSASASTSAIPACQNCGTTITPLWRRDDAGHIICNACGLYYKLHGTHRPVAMKKQEIKRRKRIVPAAETGSQAASSVANYSPPQRPSQTPAFEHSVSPDPSTALESREDYTPEPPRGPIAVDFTHYYSNSSVTSNPVA…	507	54.3384	7.94	53.45	-0.831	0(N)	Nucleus	2	PF00320;PF00320	GATA zinc finger;GATA zinc finger	CSNCKTTQTPLWRRSPAGETVCNACGLYMKARN;CQNCGTTITPLWRRDDAGHIICNACGLYYKLHGT	119;274	151;307	2.8e-11;1.4e-12	2	CSNCKTTQTPLWRRSPAGETVCNAC;CQNCGTTITPLWRRDDAGHIICNAC	Type IVa;Type IVa
246	EnsemblFungi	Ascomycota	Dothideomycetes	Pleosporales	Bipolaris zeicola 26-R-13	Bzei1	EUC28799	METLDAGSRQAVGLPSINHMDAERVKREEAEYQRKHSAPAMPSPLHPYTGPSHAHSNPQSSIPSAVPGSLGGLLSPPESRRMSGDDKDSQRAPARQSLPSIHEALGSEQPLSYPATVPPPSSITSAPQHYHSSSAAPSPAEQRPRNYPPDLQHPSQGPPSSLSHPRSPYIASSASQTGPPPPAPAPTDSLPRPPFSDPRPPYPTPQHNPKLPSLHPLKTAPASPPSAPHPSIPYSSYPPPVSKPYESPAPRSAPPMSQHHPYSQHPPSYAVSASSTSAPNPTYPPATSTYSAPPRYVHQAWQDSAEMARLEEKKIGRSSLAPYGESVKRHLESFDIEASLNEMADGSGRIAEFSKIYRQRAHDNQRIGMTPQSMPRLEEVDEMLKQSERIQMSLQRMRD…	1163	129.687	6.389	66.25	-0.685	0(N)	Nucleus	2	PF00320;PF03074	GATA zinc finger;Glutamate-cysteine ligase	CHSCNRAETPEWRRGPDGARTLCNACGLRIR;IHMDAMAFGMGSCCLQITFQAKNIEEGRTMYDQLSPIAPILLALTAATPIYKGFLADTDVRWNQISRSVDDRTPEELGEKPLKNDRWRLPKSRYASNSTYIAQDPRLRPEYLDPNLIIDPDLKKRLVEGGMDDLLATHFAHLFIRDPIVVFAEDLEELDLTKADHFENLQSTNWQHMRFKPPPAGSDMGWRVEFRPMEIQITDFENAAFSIFIVLLTRAILSFNLNFYIPITLVSENMETAHIRDAVSTQKFWFRKDPFPTHKASNGTGTSTPAENPSRPVTPTGPVEEEYEKMTINEVINGQQTSSGEAGFPGLIPLVESYLNSMNVDVETRCDLATYLDLIRKRANGTYWTAAKWIRHFVQSHPS…	460;757	490;1145	3.3e-09;1.7e-173	1	CHSCNRAETPEWRRGPDGARTLCNAC	Type IVb
247	EnsemblFungi	Ascomycota	Dothideomycetes	Pleosporales	Bipolaris zeicola 26-R-13	Bzei2	EUC31706	MEISSSQDSARRGVLQDAIFPAFGNDAGSPGAESPEQMQKNDPLGTQIWKLYSRAKTQLPNAERMENLTWRMMAMNMRRADMDRNKGPPPRSAPSGIAQQLRKSQDQQAQVHQPAQDAMNLDDFIFPSSVGSPAGLSPPGSNEDAAPFIATAPAIPIRKPHLASDHNLSLARASAPSVPPAISKEDEFGYVPRHVRKTSIDERRPPKRRAEASPLVPPVNSIMIPTDAHSEADLHQYSLDNTTMQPPTFPASQGQGAFSLDTFQMHEDPAVHSAGPYQQSFSGFSPVGSPLMSHNAFNSNMFNHNSMASSLNSTDYYSPPSSAFPSTVSTPQPISEDSQMYFDRSGMDIRTSQHGASYGPHRPSNLSTSMQPQYIFNPGAGGQDSVFSPVTSASSSLPF…	824	88.1114	7.823	49.94	-0.731	0(N)	Nucleus	2	PF08550;PF00320	Nitrogen regulatory protein areA, GATA-like domain;GATA zinc finger	IWKLYSRAKTQLPNAERMENLTWRMMAM;CTNCFTQTTPLWRRNPEGHPLCNACGLFLKLHGV	48;606	75;639	2.9e-09;6.3e-13	1	CTNCFTQTTPLWRRNPEGHPLCNAC	Type IVa
248	EnsemblFungi	Ascomycota	Dothideomycetes	Pleosporales	Bipolaris zeicola 26-R-13	Bzei3	EUC33506	MHPHRPDLSGLPMDNVMQHMDLDMSSLDGTDGQSSAFAFADPQMQQSAVPPNNTMATDMQMTGAGAGPLPTGFGAPNMNPSGSTLTEFTKRRNWSQRVLEELRDLLHILTPDGRILYVSASCKSLTGWEPSHIMGRFINEFIHPDDIGIFVKEFNESIASGNPLRFFYRFRKTDDSWIIFESHGHPHLSSDTNTFAPPNAINCRGFFMMARPYPTKNAALLDSFLEHKIENERLMKRIAELKREEQDEQDDWAKKADNATTSMTPSESHVTQNMSQADAASYAQMPPPAKPVVSNTALTRQNLDEALAASKPDSINDKMARYEGANHLETIEMLTGLRYRDGERSQGISTGDASPNLIRGDAGIQISLDRDGRNSSEKKKKLKIADEYVCTDCGTLDSP…	455	50.2618	6.075	59.71	-0.695	0(N)	Nucleus	2	PF08447;PF00320	PAS fold;GATA zinc finger	ILYVSASCKSLTGWEPSHIMGRFINEFIHPDDIGIFVKEFNESIASGNPLRFFYRFRKTDDSWIIFESHGHPHLSSD;CTDCGTLDSPEWRKGPNGPKTLCNACGLRWAKKEKK	115;390	191;425	5.8e-10;1.4e-11	1	CTDCGTLDSPEWRKGPNGPKTLCNAC	Type IVb
249	EnsemblFungi	Ascomycota	Dothideomycetes	Pleosporales	Bipolaris zeicola 26-R-13	Bzei4	EUC35063	MESSKPSNGLSMTYATSAPATAGGQAGSPPVCQNCSTSTTPLWRRDETGAVLCNACGLFLKLHGRPRPISLKTDVIKSRNRVKTGGLGGRKRTSDQGGLPAAHPDADGQLALAQHRRASGKMSSGLSDRSQSPISRTGTPNFNHPSNIAPQHMFEQALHGDFHSPSLPGFGLRAPSPATSSVNGSHLEAPLPYETLAAQNTALKTRVSEMELINDLFRNRVSELEQSEQSARQTESTLRKELEEVKQREADLKRRLEEIENESPRHKRMKMSEFVDESRAGTPISSMVD	289	31.3788	9.113	62.87	-0.74	0(N)	Nucleus	2	PF00320;PF25026	GATA zinc finger;Asd-4-like domain	CQNCSTSTTPLWRRDETGAVLCNACGLFLKLHGR;YETLAAQNTALKTRVSEMELINDLFRNRVSELEQSEQSARQTESTLRKELEEVKQREADLKRRLEEIENE	32;193	65;262	9e-12;3.6e-22	1	CQNCSTSTTPLWRRDETGAVLCNAC	Type IVa
250	EnsemblFungi	Ascomycota	Dothideomycetes	Pleosporales	Bipolaris zeicola 26-R-13	Bzei5	EUC38268	MAHPSGSGGTSFAPTPTHPHQLSRETSRDELEMAESLRLLNQAHEHQKPRPEATSQEQQQQQQQQQQQQHTSVQDDQRSEIYHSLEDAVPIPDGPPTPSTAASLQIPNMNYETPNASITGQVCSNCKTTQTPLWRRSPAGETVCNACGLYMKARNQSRPVNLKRNTQTQPSMSVQQSPTPGSTDGGRTCAGNVAGSPRVATYVAADQMAAGTCPGGGRCNGTGGQQGCSGCPAFNNRVSKTAKFALAQANAAPGENRGGSDAASSTSASASTSAIPACQNCGTTITPLWRRDDAGHIICNACGLYYKLHGTHRPVAMKKQEIKRRKRIVPAADTGSQAASSVANYSPPQRPSQTPAFEHSVSPDPSTALESREDYTPEPPRGPIAVDFTHYYSNSSVTS…	511	54.8268	7.936	53.19	-0.849	0(N)	Nucleus	2	PF00320;PF00320	GATA zinc finger;GATA zinc finger	CSNCKTTQTPLWRRSPAGETVCNACGLYMKARN;CQNCGTTITPLWRRDDAGHIICNACGLYYKLHGT	123;278	155;311	2.9e-11;1.4e-12	2	CSNCKTTQTPLWRRSPAGETVCNAC;CQNCGTTITPLWRRDDAGHIICNAC	Type IVa;Type IVa
251	EnsemblFungi	Ascomycota	Dothideomycetes	Pleosporales	Bipolaris zeicola 26-R-13	Bzei6	EUC39431	MMMGLEADAMNGFDMSEGQSLDSMVAQNDKENRRRSMPPFARGSQQMNLGSPETRRLSMMNFGDPNGGDMEDFRFDMSSATMDNLMHSSTASFPRSTAAMQNDQLPATDLSIGNQYQGQASPFPQMTAPGSAYASPMHQKTSLDMEMSSYQNGINMSLDMNDSLNMMPSDMNIFPGNQFNSPLLGSPLNQDFVGSIPTAPQDNGNTNNSNTNANTNNNSSNNTPSTQAQDHFKRPSVNNTPDPKSGRSSYLSRALSQDQASMRSHSRPQSDRHSSNSVPTRMTLASLRNQQPIAQDPAQDLPKDVINKQLRESNVPWQTPAGGFPSTMHQNPHMKTQFKNAYSSTGFDMLAVLMRVATRPDPQIDIGSVDLSCAFVVCDAELDDIPIVYCSENFERLTG…	1052	116.192	8.608	58.7	-0.721	0(N)	Nucleus	3	PF13426;PF08447;PF00320	PAS domain;PAS fold;GATA zinc finger	AFVVCDAELDDIPIVYCSENFERLTGYTRHMILGRNCRFLQAPDGKVESGIKRNYVDDDSVYYLKNMIENRAEAQISLINYRRGGQPFMNLLTMIPIAWEPGGKTKFFIGFQVDL;LYLSPASNRILEYDPSELVGTALSSVCHPSDIVPVTRELKETTSGASVNVVFRIRRKKSGYMWFEGHGSLHTEQGK;CANCHTRQTPEWRRGPSGNRDLCNSCGLRWAKQ	374;581;932	488;656;964	2.5e-12;2.1e-07;3.2e-11	1	CANCHTRQTPEWRRGPSGNRDLCNSC	Type IVb
252	EnsemblFungi	Ascomycota	Dothideomycetes	Pleosporales	Byssothecium circinans str. CBS 675.92	Bcirc1	KAF1948387	MTGSSGSGGISLAPTPTHPHHLSMSREHSREDVEMAESLSQLNQAEPRTPRITSPQQGQGESPADTPPAQSSEIYHSLEDTLRLRESEQQEQSPNPATPTSLPPPSISGGNAPITGQICSNCGTTRTPLWRRSPAGETICNACGLYLKARNQQRPTNLKRNTPLPIVPLQQRPVPGQSHERSTSPGNADPSPRVDSYVAADHGVTGTCPGGGRCNGTGGQQGCNGCPAFNNRVSKTTNFALVQATAAPSSSDAAINERNSQSTVTSVMQTCQNCGTSVTPLWRRDEAGQTICNACGLYYKLHGAHRPVEMKKQEIKRRKRIVPADTTGSSTQAPSLASYSPQPRATQTPTFEHSASPDPSSTIESSEVYPVGARIPVPVDFTNYQSTSNPASNLGGPPT…	505	53.8569	7.975	57.45	-0.795	0(N)	Nucleus	2	PF00320;PF00320	GATA zinc finger;GATA zinc finger	CSNCGTTRTPLWRRSPAGETICNACGLYLKARN;CQNCGTSVTPLWRRDEAGQTICNACGLYYKLHG	119;271	151;303	1.3e-10;5.5e-12	2	CSNCGTTRTPLWRRSPAGETICNAC;CQNCGTSVTPLWRRDEAGQTICNAC	Type IVa;Type IVa
253	EnsemblFungi	Ascomycota	Dothideomycetes	Pleosporales	Byssothecium circinans str. CBS 675.92	Bcirc2	KAF1949494	MPSPPLRPSNGHSMTYATAAPATAGGQPNQPAVCQNCTTTTTPLWRRDEAGAVLCNACGLFLKLHGRPRPISLKTDVIKSRNRVKTGVPGGRKKTESNGLPAAHPDAGASLGFAQPRRASGKISSGLSDRSQSPISRTGTPNFGHPSNIAPQHMFDGVLNENAFHSPQMPNFPLRNPSPAPSSINGSHLEPPLAYDTLAAQNTALKTRVSELELVNDLFRGRVTELEGSEKAARSMEAQLRAELEQVKQREVDLKRRLDELEGEGPRHKKMRMSDMIDESRVGSPISSLTE	291	31.4201	9.535	66.46	-0.662	0(N)	Nucleus	2	PF00320;PF25026	GATA zinc finger;Asd-4-like domain	CQNCTTTTTPLWRRDEAGAVLCNACGLFLKLHGR;YDTLAAQNTALKTRVSELELVNDLFRGRVTELEGSEKAARSMEAQLRAELEQVKQREVDLKRRLDELEGE	34;195	67;264	6.1e-12;1.5e-22	1	CQNCTTTTTPLWRRDEAGAVLCNAC	Type IVa
254	EnsemblFungi	Ascomycota	Dothideomycetes	Pleosporales	Byssothecium circinans str. CBS 675.92	Bcirc3	KAF1955210	MLTTQQLPSPNDPFALQQDTNTLSGVAGAGPLPTSFGAPNLNTSGSTLTEFTKRRNWSQRVLEELRDFLHILTPDGRMMYASPSCKSLTGWDPEQLIGRFIGEFVHPDDSGIFVKEFNESIASGNPLRFFYRFLKQDKSWVIFEAHGHPHLSNDASTFAPPNTMNCRGFFMMARPYPTRNAALLDSFLEHKIENERLMKRIAELKREEQEENDTVTDTTWKKADGTASMIGGTVSEPQSRPEGENSIAAYNGMPPPAKPGAGLSNMALTRQNLDEVSAASKPDSITDKMARYEGTTHLETIEMLTGLRYRDGERSQGISTGEHSPMLIRGDAGIQISLDRDGRTSSEKKKKLKMADEYVCTDCGTLDSPEWRKGPNGPKTLCNACGLRWAKKEKKRQGN…	417	46.1824	6.811	59.04	-0.729	0(N)	Nucleus	2	PF08447;PF00320	PAS fold;GATA zinc finger	MYASPSCKSLTGWDPEQLIGRFIGEFVHPDDSGIFVKEFNESIASGNPLRFFYRFLKQDKSWVIFEAHGHPHLS;CTDCGTLDSPEWRKGPNGPKTLCNACGLRWAKKEKK	79;360	152;395	1.5e-10;1.3e-11	1	CTDCGTLDSPEWRKGPNGPKTLCNAC	Type IVb
255	EnsemblFungi	Ascomycota	Dothideomycetes	Pleosporales	Byssothecium circinans str. CBS 675.92	Bcirc4	KAF1956547	MNGYPYSQRPYGNRGSVPMVDMSGDQMNAFDLNHGQSLDDIVSSNEKDRRRMSMPSRFSAINFGDPNNAMEDFNFEMPTSAGLEGMMPSGTFPQASPQLQPAQTPANDLAITTQFSNANSPFSNMPQAASAYASPMHANLDMDMASPFPAMSLPLDMNGSLSVMPTDINLFPNTQFAAPVMSLQAQDRYISESSSATPDVRSTVPTRTNSGQDENSMRSDSRPKSEEQTFPKNDPSKMSLTSLKNNPPIALPAHHEVNTNAFNDMTIPWTTPAGGFSSTMNSTPPMNTQFKNAYSSTGFDMLGVLMRVATRADPQIDIGSVDLSCAFVVCDNELDDTPIVYCSENFERLTGYNKHMILGRNCRFLQSPDGKVKPGMKRTYVDDASIYCLKTAIEQRQEA…	1010	111.595	8.415	63.15	-0.64	0(N)	Nucleus	3	PF13426;PF08447;PF00320	PAS domain;PAS fold;GATA zinc finger	AFVVCDNELDDTPIVYCSENFERLTGYNKHMILGRNCRFLQSPDGKVKPGMKRTYVDDASIYCLKTAIEQRQEAQVSLINYRRGGQPFMNLLTMIPIPWEPGGPIKFIVGFQVDL;LYLSPSSNRILEYDASELVGTALSSVCHPSDIVPVTRELKDMSNGSSVNVVFRIRRKKSGYMWFEGHGSLHTEQGK;CVNCHTKTTPEWRRGPSGNRDLCNSCGLRWAKQ	326;533;883	440;608;915	7.4e-12;3.2e-07;2.9e-11	1	CVNCHTKTTPEWRRGPSGNRDLCNSC	Type IVb
256	EnsemblFungi	Ascomycota	Dothideomycetes	Pleosporales	Byssothecium circinans str. CBS 675.92	Bcirc5	KAF1962159	MWNSSSFGLPSINTLDSVKREEMERKRSYLFPAPNLSASASSATAGPGPLGGLLSPPESRRTSGDDEKEAQRPRQSLPSIHELAFAPNVPPASAPASASQPHFPPPTKSPVDHRTRAFSTDLHGSQGPGNPFSHPHSPFMTTSNSSAPPPPPPQAQSDSLPRPSFSEARPSFSDSRPSFSAPQHNPKLPALHPLQTTQSPPPGPRPNPPYSSYPSQSSSAYEGPAPHSAGPMNRGYGYSQYPSSNYPLSAPAPGPPNSAYPPSATYSAPPRSYPNPPSWPENRAEDKKMHRSSLAPYGESVKRHLESFDVEASLNEMADGSGHIKEFSTHYMQQAFDTHRTGIVPHSIPPLSEVDRMLDYSEKIQISLQRMRDVIYNYQQASMVEAPQDPRHRPMKGYD…	1153	128.45	6.387	63.52	-0.654	0(N)	Cytoplasm	2	PF00320;PF03074	GATA zinc finger;Glutamate-cysteine ligase	CHSCNRAETPEWRRGPDGARTLCNACGLHYAKL;IYMDAMAFGMGSCCLQITFQAKNIEEGRTMYDQLSPLGPILLALTAATPIYKGFLADTDVRWNQISGSVDDRTPEELGEKPLEHDRWRLPKSRYASNSTYISQDPRLRPEYLDPDLVIDKDIKQRLIDGGMDDLLATHFAHLFIRDPIVVFAEDLQTLDLSKADHFENLQSTNWQHMRFKPPPPGSDMGWRVEFRPMEIQITDFENAAFSIFIVLITRAILSFNLNFYIPIARVSENMETAHIRAAVSTQKFWFRKDPFNSHSRSNGTGTSTPAETSRPATPSGPVEDEYEHMTINEVINGQTSSSSSSSSTFPGLIPLVESYLDSMNVDVETRCDLARYLDLIRKRADGTYWTAAKWIRHFVQS…	434;746	466;1135	5e-10;6e-171	1	CHSCNRAETPEWRRGPDGARTLCNAC	Type IVb
257	EnsemblFungi	Ascomycota	Dothideomycetes	Pleosporales	Byssothecium circinans str. CBS 675.92	Bcirc6	KAF1962940	MAQPERGVEQLHSDLPDAFDGDSIGALADADPASSLSFDGDWNGHWDWNSAYPSPNTSFEQQQQHPQQQQTAKLEGHQDSLPSAAARRGVLANSSIFPSFKNDAGGADIGSPEQMQQSDPLATQVWKLYSKAKTQLPNSERMSNLTWRMMAMNMRRERESRNKIQKEPKSPPSMAAPARPALKSAPSGIAQLRKSVDQQAQTQANQAPVQAQAQPPLSDAMNLDDFILPSSVGSPAGLSPSPSNEMGPPSNATAPAIPIRKANQSHDHNLSLARASAPSVPPVINRENEFGYVQRHVRKTSIDERRPPKRRAEASPQVPPVNNTMMQSNPEDDIALHHYSLDHSMQPPSFNNHPQVPFSINTFQLHEDPIINSAGPFQQSFGFSPVGSPLMNNHASSYS…	925	98.889	7.812	49.89	-0.793	0(N)	Nucleus	2	PF08550;PF00320	Nitrogen regulatory protein areA, GATA-like domain;GATA zinc finger	VWKLYSKAKTQLPNSERMSNLTWRMMAM;CTNCFTQTTPLWRRNPEGHPLCNACGLFLKLHGV	125;704	152;737	2e-08;7.2e-13	1	CTNCFTQTTPLWRRNPEGHPLCNAC	Type IVa
258	EnsemblFungi	Ascomycota	Dothideomycetes	Pleosporales	Clathrospora elynae str. CBS 161.51	Cely1	KAF1940035	MTYATSAPATAGGQPGSPPVCQNCSTSTTPLWRRDESGAVLCNACGLFLKLHGRPRPISLKTDVIKSRNRVKTGGPGGRKRTSDQGGLAAAHPDADGQLALAQHRRASGKLSSGLSDRSQSPISRTGTPNFNHPSNIAPPHMFEQALHSDFHSPSLPSFGLRAPSPANSSINGSHLEPPLPYDTLAAQNTALKTRVNEMELINDLFRNRVSELELSEQSARQTELSLRQQLEGARQREADLKRRLDEYEDDSPLHKKAKLNMDEFLDPSRAGTPINALLD	280	30.3676	8.944	69.82	-0.71	0(N)	Nucleus	2	PF00320;PF25026	GATA zinc finger;Asd-4-like domain	CQNCSTSTTPLWRRDESGAVLCNACGLFLKLHGR;YDTLAAQNTALKTRVNEMELINDLFRNRVSELELSEQSARQTELSLRQQLEGARQREADLKRRLDEYEDD	21;182	54;251	4e-12;2e-20	1	CQNCSTSTTPLWRRDESGAVLCNAC	Type IVa
259	EnsemblFungi	Ascomycota	Dothideomycetes	Pleosporales	Clathrospora elynae str. CBS 161.51	Cely2	KAF1943184	MEFASADDPSRRGMLQDAIFPAFGNDAGTPSVESPAEMQRNDPLGTQIWKLYQRAKTQLPNAERMENLTWRMMAMNMRRAELDRNKGPAQDTQRSEMLLTPAASARPQPYSAPSGIAQQLRKSQDQQAQAQLTPPQDAMNLDDFIFPSSVGSPAGLSPELSNEDAAPFHATAPAIPIRKPQLANNHNLSLARASAPSVPPTIIRENEFGYVSRHVRKTSIDERRPPKRRAEASPQVPPVNSIMIPTDAQSEADLHQYSLDHSMQPPPFPPSQPHVPFAIDTFHMHEDHSAMHSAGPYQQSFSGFSPVGSPMVSQHAFSQNMFNPSSMASSLNSTDYYSPPSSAFPSTVSTPQPIPEDSQMYFDRSGMDIRNSHGGSSYGPHRPSHLSTSMQPQFIFNPG…	844	90.7185	7.486	49.92	-0.732	0(N)	Nucleus	2	PF08550;PF00320	Nitrogen regulatory protein areA, GATA-like domain;GATA zinc finger	IWKLYQRAKTQLPNAERMENLTWRMMAM;CTNCFTQTTPLWRRNPEGHPLCNACGLFLKLHGV	48;626	75;659	5.8e-09;6.5e-13	1	CTNCFTQTTPLWRRNPEGHPLCNAC	Type IVa
260	EnsemblFungi	Ascomycota	Dothideomycetes	Pleosporales	Clathrospora elynae str. CBS 161.51	Cely3	KAF1943510	MAHYPNGGAEMGLDPMAGPPMHSQQANFGHSIDGPPMDDVMQQMDLDLASLDGGEGPHGGFSFGDVQMQSHVPTSSTMDMDMSGAGAGPLPTGFGAPNMNPSGSTLTEFTKRRNWSQRVLEELRDLLHILTPDGRVLYVSPSCKPLTGWEPAHVMGRFINEFIHADDIGIFVKEFNESIASGNPLRFFYRFRRPDDTFTIFEAHGHPHLSGDPGAFAPPNAINCRGFFMMSRPYPTKNAALLDSFLEHKIENERLMKRIAELKREEHDEHDEWAKQTEASTTMSQADAVSYAQMPPPAKPVISNTALTRQNLDEALAASKPDSINDKMARYEGTNHLETIEMLTGLRYRDGERSQGISTGDASPNLIRGDVGIQISLDRDGRSAADKKKKLKMADEYVC…	464	50.8987	5.793	58.56	-0.631	0(N)	Nucleus	2	PF08447;PF00320	PAS fold;GATA zinc finger	LYVSPSCKPLTGWEPAHVMGRFINEFIHADDIGIFVKEFNESIASGNPLRFFYRFRRPDDTFTIFEAHGHPH;CTDCGTLDSPEWRKGPSGPKTLCNACGLRWAKKEKK	137;399	208;434	1.2e-07;2.2e-11	1	CTDCGTLDSPEWRKGPSGPKTLCNAC	Type IVb
261	EnsemblFungi	Ascomycota	Dothideomycetes	Pleosporales	Clathrospora elynae str. CBS 161.51	Cely4	KAF1944374	MAHPSGSGGTSLAPTPIYAHHLSRETSRDELEMAESLRRLNQAHDHHRSRSGTPDQEPHSFTTQEDNRSGIYHSLEDAVPISEGLATPATLATLQTPSMSFDGTNASVTGQVCSNCRTTQTPLWRRSPSGETVCNACGLYMKARNQSRPVNLKRNTQTQPMVSMQQSPTTCQNDHNRTSPGNLAALPQVATYVAADQMATGTCPGGGRCNGTGGQQGCGGCPAFNNRVSKTAKFALAQANASSQLSDSTNGSNTAAGPASTNAIPACQNCGTTITPLWRRDDAGHIICNACGLYYKLHGTHRPVAMKAQEIKRRKRVVPAGDASSQGPPSLADYSPPQRPSQTPAFEHSVSPDPLTALESKEEYTPEPRGPLAIDFTHYHSNPLIASKMQPSAPSPRKR…	495	53.2053	8.208	54.73	-0.792	0(N)	Nucleus	2	PF00320;PF00320	GATA zinc finger;GATA zinc finger	CSNCRTTQTPLWRRSPSGETVCNACGLYMKARN;CQNCGTTITPLWRRDDAGHIICNACGLYYKLHGT	113;267	145;300	2.6e-11;1.3e-12	2	CSNCRTTQTPLWRRSPSGETVCNAC;CQNCGTTITPLWRRDDAGHIICNAC	Type IVa;Type IVa
262	EnsemblFungi	Ascomycota	Dothideomycetes	Pleosporales	Clathrospora elynae str. CBS 161.51	Cely5	KAF1946000	MLTIHCSIGLPSINHLDAERSKREETEYHRKQAAAVMPSPLHPYAGPPHLHSNHQSSPASAVPGSLAGLLSPPESRRTSGDEKESQRPTARQSLPSIHEALGSEPSLSFPATVPPPSVLTSAPQQYLPPSATTSPSDQRTRNFSNDLQHASQGPSNPFSHPRSPFPGTPTPQAAPPPPPPQLQPDSHPRPPYSEPRPPYSTPQHNPKFPALHPLKITQASPPTAARPNVPYPSYPPPSTTSYESPTPHSAGPMNPHYPYSQYPPSYPLSAPPATAPNSAYPPVSSTYSAPPRYPPQPWQDNSEMARLEEKKINRSSLAPYGESVKRHLESFDLEASLNEMADGSGRITEFSNIYRQRAHENQRIGMTPQSMPRLEDVDDMLKQSERIQISLQRMRDVVF…	516	56.5512	9.105	47.19	-0.992	0(N)	Nucleus	1	PF00320	GATA zinc finger	CHSCNRAETPEWRRGPDGARTLCNACGLHYAKL	457	489	1.9e-10	1	CHSCNRAETPEWRRGPDGARTLCNAC	Type IVb
263	EnsemblFungi	Ascomycota	Dothideomycetes	Pleosporales	Clathrospora elynae str. CBS 161.51	Cely6	KAF1946441	MNGYPYPPRPFQGSDAGPMMMDMAGGGMDGYDMVEGQSLDSIVTQNDKDNRRLSMPVYARRQQMNMGNPDPPRLGVMGFGDPNDTSMDGYQFDMSSAAMDSMMRSNTTFPRTAGATQNNRNAPYSAMTAPSSAYASPMHQKSSLDMDMSSYANGMLDMDDSLNMMPTNMNMYPGTQFNAPMLHSPVNQDFCGPRSNPSQENNAPSMQSLDQFKRPSMSITPEAKSARSSFLGRSESQDQQSMRSNSRPESDQRSSIDVPTRMSLSSLRNQQPATQDPTQDLAQDLPKDILNKQLQHGKTPWSPPEAAFPPTKHHDPYDKTQFKNVYSSTGFDMLGVLMRVASRPDPEIDIGSVDLSCAFVVCDAELDDIPIVYCSDNFERLTGYTRHMILGRNCRFLQA…	1039	115.368	8.767	58.93	-0.733	0(N)	Nucleus	3	PF13426;PF08447;PF00320	PAS domain;PAS fold;GATA zinc finger	AFVVCDAELDDIPIVYCSDNFERLTGYTRHMILGRNCRFLQAPDGKVESGVKRNYVDDDSVYYLKSIIRSRSEAQISLINYRRGGQPFMNLLTVIPIAWEPGGKTKFFVGFQVDL;LYLSPASNRILEYDPSELVGTALSSVCHPSDIVPVTRELKETTSGASVNVVFRIRRKKSGYMWFEGHGSLHTEQGK;CANCHTRTTPEWRRGPSGNRDLCNSCGLRWAKQ	358;565;907	472;640;939	1.7e-11;2.1e-07;3.5e-11	1	CANCHTRTTPEWRRGPSGNRDLCNSC	Type IVb
264	EnsemblFungi	Ascomycota	Dothideomycetes	Pleosporales	Corynespora cassiicola Philippines	Ccas1	PSN62037	MANSSASGGTSLAPTPTHPHQLSRESSKEDIEMAESLNLLHHAQASHAPRHDSRSQGQPPVSPPHEQGSEIYHSLEDTVPYQQGDQPEQAPTPASTVSMAPRSVSGGNAPVTGQVCSNCGTTRTPLWRRSPSGETICNACGLYLKARNQQRPTNLKRNTQSQPIVSVSQSPAPGQGHDRSTSPGNAAASPRVATYVAADQMSAGTCPGGGRCNGTGGQQGCNGCPAFNNRVSKTAQFALAQASSCSGASDAGGESAAQSSTTGGTNVIPACQNCGTTITPLWRRDEAGHTICNACGLYYKLHGTHRPVAMKKQEIKRRKRVVPAAPGDGSTQAASSVAGYSPRPRVMQTPSFEHSVSPDPSTAIESSEDYPPEPRAPPAIDFTHWNASQPVTSHPGNSL…	510	53.5854	8.211	53.12	-0.77	0(N)	Nucleus	2	PF00320;PF00320	GATA zinc finger;GATA zinc finger	CSNCGTTRTPLWRRSPSGETICNACGLYLKARN;CQNCGTTITPLWRRDEAGHTICNACGLYYKLHGT	116;271	148;304	8.1e-11;4.8e-12	2	CSNCGTTRTPLWRRSPSGETICNAC;CQNCGTTITPLWRRDEAGHTICNAC	Type IVa;Type IVa
265	EnsemblFungi	Ascomycota	Dothideomycetes	Pleosporales	Corynespora cassiicola Philippines	Ccas2	PSN62583	MDISADGLSFDLVEGQSLDDIVSQNEKANRRRSMPVYSGHQAQQTQSMQLGSPDSRRLSMMNFGDSNGSLDDFQFNMTPSADMDGMLRGTTSFPRTTEMQNDRIPAADLAINTQFSNANSPFSTMAAPGSAYASPMHPNVGLDVDISSPYQNGMSMGLDMNDPLAMNPSDMNIFSNQFTQNMMNSPVAQDFSTPLPAPPQQESNMSALQPPGPYRTNSSMSVTPDARSGMPSRSNSQEQNSGRSSSRPQNDQRTSSKSIPTQMAQTSLKNQEPIAMPTQHEVTTDPNPFHHAKYPWRPPPGGFPSTMHSNPHMNTQFKNAYSSTGFDMLGVLMRVATRPNPQIDIGSVDLSCAFVVCDAQTDDNPIVYCSENFERLTGYNKHMILGRNCRFLQSPDGQV…	1036	114.394	8.523	59.59	-0.734	0(N)	Nucleus	3	PF13426;PF08447;PF00320	PAS domain;PAS fold;GATA zinc finger	AFVVCDAQTDDNPIVYCSENFERLTGYNKHMILGRNCRFLQSPDGQVEPGIKRKYVDDDSVLYLKNMINTRQEAQISLINYRRGGQPFMNLLTMIPIPWEVGGDIKFFVGFQVDL;LYLSPSSNTILEYDPSELVGTALSSVCHPSDIVPVTRELKETSNGASVNVVFRIRRKRSGYMWFEGHGSLHTEQGK;CANCHTRTTPEWRRGPSGNRDLCNSCGLRWAKQN	353;559;910	467;634;943	7.9e-14;3.7e-07;4.4e-11	1	CANCHTRTTPEWRRGPSGNRDLCNSC	Type IVb
266	EnsemblFungi	Ascomycota	Dothideomycetes	Pleosporales	Corynespora cassiicola Philippines	Ccas3	PSN66204	RRSVGLPSINHLDSDRIKREEVDYQRKHSAPAMVSPLHAYPAPPLSHSNHQSMAASEVRGPLGGLLSPPESRRTSGDEKEPQRAPTRQSLPSIHEALGSEQSLSFSAPPPPPPPSAPVSAPQPYHPPSTAASPSDQRSRTFSSDIHASQGPPNPFSHPRSPFMNPPASSAPSAAAPPPPPPPPPPPPPAPSDSLPRPSFSEPRSSFSASQHNPKLPTLHPIRTTQSPPAGASRPNPPYSSYQQQQQPQPQPAYEASTPHSATAMNPQYSHGYSQYPPSNYPLSAPPPGPPNSAYPATQSTYSAPPRAPYSSWRDNSEMARLEEKKINRSSLAPYGESVKRHLESFDLEASLNEMAEGAGRITDFSKIYRQRAHENQRIGMTPQSMPRLEEVDEMLKHSE…	1185	132.518	6.792	62.31	-0.762	0(N)	Cytoplasm|Nucleus	2	PF00320;PF03074	GATA zinc finger;Glutamate-cysteine ligase	CHSCNRAETPEWRRGPDGARTLCNACGLHYAKL;IYMDAMAFGMGSCCLQITFQAKNIEEGRKMYDQLSPLGPILLALTAATPIYKGFLADTDVRWNQISRAVDDRTPEELGEKPLKNDRWRLPKSRYASNSTYISQDPRLRPEYLDPDLVVDEELKQRLVDGGMDDLLATHFAHLFIRDPIVVFNEDLEELDLSKADHFENLQSTNWQHMRFKPPPPGSETGWRVEFRPMEIQITDFENAAFSVFIVLITRAILSYNLNFYIPIARVSENMETAHIRDAVSTQKFWFRKDPFPAHASSKPNGNGASTPADGPSRPTTPFGPVEDEYEQMTINEVINGQQCDGGFPGLIPLVENYLNSMNIDVETRCELASYLDLIRKRANGTYWTAAKWIRHFVQTHP…	471;781	503;1168	5.2e-10;2.1e-174	1	CHSCNRAETPEWRRGPDGARTLCNAC	Type IVb
267	EnsemblFungi	Ascomycota	Dothideomycetes	Pleosporales	Corynespora cassiicola Philippines	Ccas4	PSN67103	MYQNNGSSLSAEMAGLAPMASLSTDQAAELNMGLDDMMQMDMDLSQLDPDAHNPHNATPQAYTPFTQPQLNSAVSSGTPTDVFAMGTGQDSLTGAGAGPLPTGFGAPSLNPSGSTLTEFTKRRNWSQRVLEELRDLLHILTPDGRILYVSPSCRTLTGWEPQQLLGRFVGEFIHPDDSGIFVKEFNESIASGNPLRFFYRFRKIDETWAIFESHGHPHLSSDNSTFAPPNALNCRGFFMMARPYPTKNAALLDSFLEHKIENERLTKRIAELKREEQEEAEGTEKQWASKDTHTSITPSDGPGRTTDSDGASAAYNAMPPPAKPGISNTALTRQNLDEALAASKPDSINDKMARYEGATHLETIEMLTGLRYRDGERSQGISTGDASPLLIRGDAGIQI…	479	52.2898	5.623	64.51	-0.619	0(N)	Nucleus	2	PF08447;PF00320	PAS fold;GATA zinc finger	ILYVSPSCRTLTGWEPQQLLGRFVGEFIHPDDSGIFVKEFNESIASGNPLRFFYRFRKIDETWAIFESHGHPHLSSDN;CTDCGTLDSPEWRKGPNGPKTLCNACGLRWAKKEKK	146;422	223;457	6.3e-09;1.5e-11	1	CTDCGTLDSPEWRKGPNGPKTLCNAC	Type IVb
268	EnsemblFungi	Ascomycota	Dothideomycetes	Pleosporales	Corynespora cassiicola Philippines	Ccas5	PSN69007	MGSGVNQRGVLSTLFSAADQQPFPTSSTSPRAAARVRFSPVAADCDLPDSPSSPRHQHHQHHHNQQYHTPQQSLHPSANLDSNLDFSPDDVAARQGMLEHSIFPTLANDAHAADMGSPEEMQKNDPLATQIWKLYSKARTQLPNAERMENLTWRMMAMSMRRAELDRNKGLAQQRNDMKPPPPASAMPARPALKSAPSGIAQLRKSVDQQAQAQAPDAMNLDEFIFPSSVASPAGLPPSPSNEMRAPSNATAPAIPIRKANQSHDQTHSLARASAPSVPPAIIRENEFGYVQRHVRKTSIDERRPPKRRAEASPQVPPVNSIMIPNDPEAEAALNSYSLDHHSMPPSSTFQAPQPSVPFSIDTFQLHEDPIISSAGPFQQNFGFSPVGSPLMNQNASYG…	936	99.7682	8.876	51.52	-0.724	0(N)	Nucleus	2	PF08550;PF00320	Nitrogen regulatory protein areA, GATA-like domain;GATA zinc finger	IWKLYSKARTQLPNAERMENLTWRMMAM;CTNCFTQTTPLWRRNPEGQPLCNACGLFLKLHGV	131;706	158;739	2.8e-09;3.3e-13	1	CTNCFTQTTPLWRRNPEGQPLCNAC	Type IVa
269	EnsemblFungi	Ascomycota	Dothideomycetes	Pleosporales	Corynespora cassiicola Philippines	Ccas6	PSN71321	MTYATAAPATSGGQANSPPVCQNCTTSTTPLWRRDESGSVLCNACGLFLKLHGRPRPISLKTDVIKSRNRVKTGGPGSRKKPADANGLPAAHPDADGQLGLAQHRRASGKISSGMSDRSQSPISRTGTPGLQHPSNIAPQHMFDGALHSDFHSPSLPGFALRQPSPGSTSSVNGSHLEPPLPYDTLAAQNTALKTRVSELEVINELFRGRVGELESSEQAARETETQLRAEVADLKRRLDELDDSHRHKKMRLSDLVDESRAGTPINAMTE	271	29.0641	8.962	67.42	-0.675	0(N)	Nucleus	2	PF00320;PF25026	GATA zinc finger;Asd-4-like domain	CQNCTTSTTPLWRRDESGSVLCNACGLFLKLHGR;YDTLAAQNTALKTRVSELEVINELFRGRVGELESSEQAARETETQLRAEVADLKRRLDELDDSHRHKKMRLSDLVDE	21;183	54;259	7.5e-12;7e-23	1	CQNCTTSTTPLWRRDESGSVLCNAC	Type IVa
270	EnsemblFungi	Ascomycota	Dothideomycetes	Pleosporales	Decorospora gaudefroyi str. P77	Dgau1	KAF1831000	MAHPSGSGGTSLAPTPTHPHYLSRETSRDELEMAESLRLLNQAHEHPISKTETPPQGQQPLSGQEDQRSEIYHSLEDAVPISHTPATPTTSTSLQVPSMNFDAANAPVSGQVCSNCKTTQTPLWRRSPSGETVCNACGLYIKARNQSRPVNLKRNTQPQPMLPVQQSQTPGPGDHNGTSPGALAGSPRIATYVAADQMAAGTCPGGGRCNGTGGQQGCSGCPAFNNRVSKTAKFALAQANAGAREGSNGNDVAATAASTSAIPACQNCATTITPLWRRDDAGHIICNACGLYYKLHGTHRPVAMKKQEIKRRKRVVPAGDTPSTHTATPTADYSPSQRPSRTPALEPSLSPDPSTALDSREDSTPEPPRGPLAVDFTHYYNNNNKNNNNNNNNNNNNNN…	501	53.3803	8.789	56.01	-0.844	0(N)	Nucleus	2	PF00320;PF00320	GATA zinc finger;GATA zinc finger	CSNCKTTQTPLWRRSPSGETVCNACGLYIKARN;CQNCATTITPLWRRDDAGHIICNACGLYYKLHGT	113;265	145;298	2e-11;6.1e-12	2	CSNCKTTQTPLWRRSPSGETVCNAC;CQNCATTITPLWRRDDAGHIICNAC	Type IVa;Type IVa
271	EnsemblFungi	Ascomycota	Dothideomycetes	Pleosporales	Decorospora gaudefroyi str. P77	Dgau2	KAF1832594	MAGLDGLSMDDVIMHPMDLDLSSLDDADGPSGGFSFADPPLQQQAGDDIQMTGAGAGPLPTGFGAPNMNPSGSTLTEFTKRRNWSQRVLEELRDLLHILTPDGRILYVSPSCKVLSGWEPAQVTGRFINEFIHPDDMGIFVKEFNESIASGNPLRFFYRFRKADDSWIIFESHGHPHLSSDQTSFAPPNALHCRGFFMMARPYPTKNAALLDSFLEHKIENERLMKRIAELKREEQDEQDEWARKTEGAATTSMTPSESHATQAMSQADAASYAQMPPPAKPAISNTALTRQNLDEALAASKPDSINDKMARYEAANHLETIEMLTGLRYRDGERSQGISTGDASPNLIRGDAGIHISLDRDGRSSSDKKKKLKMADEYVCTDCGTLDSPEWRKGPNGP…	446	48.9043	5.666	62.94	-0.617	0(N)	Nucleus	2	PF08447;PF00320	PAS fold;GATA zinc finger	ILYVSPSCKVLSGWEPAQVTGRFINEFIHPDDMGIFVKEFNESIASGNPLRFFYRFRKADDSWIIFESHGHPHLSS;CTDCGTLDSPEWRKGPNGPKTLCNACGLRWAKKEKK	105;381	180;416	8.2e-10;1.4e-11	1	CTDCGTLDSPEWRKGPNGPKTLCNAC	Type IVb
272	EnsemblFungi	Ascomycota	Dothideomycetes	Pleosporales	Decorospora gaudefroyi str. P77	Dgau3	KAF1835541	METLDAGSRQSVGLPSINHLEADRVKREEVEYQRKHASAAMPSPLHPYAGASHLHSNHQSSVASAVPGSLGGLLSPPESRRTSGDEKESQRPTARQSLPSIHEALGSEQTLPFPATVPPPSSVTSAPQHHLPPSATTSPAEQRTRNFPSDLQHPSHVPSHPFSHPRSPYLNNTAPQAGPPPPPQTQTDSLPRPPFSEPRPPYSTPQHNPRLPTLHPLKTTQSPPPSAARPNIPYPSYPPPSSTYENSAPQSAGPMNPHYPYAQYPPSFPLSAASASAPNSAYPPTASTYSAPPRYPPQSWQDNSEMARLEEKKINRSSLAPYGESVKRHLESFDIEASLNEMADGSGRIAEFSRVYRQRAHENQRIGMTPQSMPRLEEVDDMLKQSERIQMSIQRMREV…	518	56.6942	9.095	47.01	-0.972	0(N)	Nucleus	1	PF00320	GATA zinc finger	CHSCNRAETPEWRRGPDGARTLCNACGLHYAKL	459	491	1.9e-10	1	CHSCNRAETPEWRRGPDGARTLCNAC	Type IVb
273	EnsemblFungi	Ascomycota	Dothideomycetes	Pleosporales	Decorospora gaudefroyi str. P77	Dgau4	KAF1835762	MEASTADDSARRGMLQDAIFPAFGNDAGTRSDAESPEEMQKNDPLGTQIWKLYSRAKTQLPNAERMENLTWRMMAMNMRRAELDRNKGWAPAAQSSELMPPPPPAPAPAATASTSLRPPPRSAPSGIAQQLRKSQDQQQAQAPGPLPHPPVDTMNLDDFIFSSSVASPAGLSPELSNEDAAPFTAAAAPAIPIRKPHLASDHTSSLSAARASAPSVPPTTIDREDEFGYVPRHVRKTSIDERRPPKRRAEASPQVPPVNSIMIPTDAQAEADLHQYSLDQHAMQPPTFPASQAQGPFAIDTFQMHEDPVIHSAGPYQQTFSGFSPVGSPLMSHNPFNSNVFNQHSMASSLNSTDYYSPPSSAFPSTVSTPQPIPEDNQMYFDRSGMDIRNAHGGASYGP…	863	91.9868	6.827	49.98	-0.708	0(N)	Nucleus	2	PF08550;PF00320	Nitrogen regulatory protein areA, GATA-like domain;GATA zinc finger	IWKLYSRAKTQLPNAERMENLTWRMMAM;CTNCFTQTTPLWRRNPEGHPLCNACGLFLKLHGV	49;645	76;678	3.1e-09;6.6e-13	1	CTNCFTQTTPLWRRNPEGHPLCNAC	Type IVa
274	EnsemblFungi	Ascomycota	Dothideomycetes	Pleosporales	Decorospora gaudefroyi str. P77	Dgau5	KAF1838906	MTYATSAPATAGGQAGSPPVCQNCSTSTTPLWRRDETGAVLCNACGLFLKLHGRPRPISLKTDVIKSRNRVKTGGPGARKRTSDQGGLPAAHPDADGQLGLAQHRRASGKISSGLSDRSQSPISRTGTPNFNHPSNIAPQHMFEQALHGDFHSPSLPGFGLRAPSPSASSINGSHLEPPLPYDTLAAQNTALKTRVSEMELINDLFRNRVSELEQSEQSARQTESTLRQELEEVKQREAHLKRRLDEMEEDSPRHKKMKMTDFVDESRAGTPISAVVD	278	30.1894	8.944	63.96	-0.74	0(N)	Nucleus	2	PF00320;PF25026	GATA zinc finger;Asd-4-like domain	CQNCSTSTTPLWRRDETGAVLCNACGLFLKLHGR;YDTLAAQNTALKTRVSEMELINDLFRNRVSELEQSEQSARQTESTLRQELEEVKQREAHLKRRLDEMEED	21;182	54;251	8.5e-12;1.1e-22	1	CQNCSTSTTPLWRRDETGAVLCNAC	Type IVa
275	EnsemblFungi	Ascomycota	Dothideomycetes	Pleosporales	Decorospora gaudefroyi str. P77	Dgau6	KAF1839584	MNGYPYPTRPYSGRNNGPMMMDMTGDGINGFNLVEGQSLDSIVTQNDKENRRRSMPVYARGPQMNMASPETRRLSMMNFGHPNNGGNMDEFQFDMASTTMDGMMRTNTAFPRTTGEMQTAQVPTADLAINTQFQSPNPPFPSMSAPGSAYASPMHQKSSLDMDMTSYQNGMAMPLDMDDSLNMMTPDMNLFSGSQFNAPMIGSPISQDFVGPMPAAPQDNNNTNNNTNTNNNTNTNSSNTPTLQSQDQFKRPSLSNTPEVKSGRSSFLSRAGSQDQGSMRSSSGPQSEQHSSTSVPTRMTLTSLQNQQPIGQDPAQDLPKEVLNKQLQEFNKSPWATPAGGFPSTMHQNPHMKTQFKNAYSSTGFDMLGVLMRVASRPDPQIDIGSVDLSCAFVVCDAE…	1080	119.272	8.677	58.24	-0.704	0(N)	Nucleus	3	PF13426;PF08447;PF00320	PAS domain;PAS fold;GATA zinc finger	AFVVCDAELDDIPIVYCSENFERLTGYTRHMILGRNCRFLQAPDGKVESGIKRNYVDDDSVYYLKNMIESRAEAQISLINYRRGGQPFMNLLTIIPIAWEPGGKMKFFVGFQVDL;LYLSPASNRILEYDPSELVGTALSSVCHPSDIVPVTRELKETTNGASVNVVFRIRRKKSGYMWFEGHGSLHTEQGK;CANCHTRTTPEWRRGPSGNRDLCNSCGLRWAKQ	392;599;950	506;674;982	4.7e-12;1e-07;3.7e-11	1	CANCHTRTTPEWRRGPSGNRDLCNSC	Type IVb
276	EnsemblFungi	Ascomycota	Dothideomycetes	Pleosporales	Didymella exigua CBS 183.55	Dexi1	KAF1923691	MYPNGAAEARPGAQAPHGGGQRLMDGQMGGHGDARRRPLVNSTLHHDPGSSGRSRAGDFDGLQLALMDSNAMPMSLALDLDMDLDMLGTDDGTSTTGGGGFTPFGCHAQGQALQTAGLQTAGGLPPGSAPGSIAGGIAGGIAGGSMATTTTTTAAGLSGAGAGPLPTGFGAPSLNPSGSTLTEFTKRRNWSQRVLEELRDLLHILTPNGRILYVSPSCKALTGWDAPQLVGRFINDFIHPEDIGIFVKEFNESIASGNPLRFFYRFRHADDSWRIFESHGHPHLTSDPSSFAPPNALNCRGFFIMARPYPTKNAALLDSFLEHKIENERLTKRIAELKREEQDEQGEQDESSRRGPQSQSGAPTESVVTQSVPPSDAASYAQMPPPAKPSVSNTALTRQ…	551	58.5606	6.359	63.88	-0.573	0(N)	Nucleus	2	PF08447;PF00320	PAS fold;GATA zinc finger	ILYVSPSCKALTGWDAPQLVGRFINDFIHPEDIGIFVKEFNESIASGNPLRFFYRFRHADDSWRIFESHGHPH;CTDCGTLDSPEWRKGPNGPKTLCNACGLRWAKKEKK	211;488	283;523	7.1e-11;1.8e-11	1	CTDCGTLDSPEWRKGPNGPKTLCNAC	Type IVb
277	EnsemblFungi	Ascomycota	Dothideomycetes	Pleosporales	Didymella exigua CBS 183.55	Dexi2	KAF1924917	MTYATAAPATPGGQSNSPPVCQNCTTSTTPLWRRDESGAVLCNACGLFLKLHGRPRPISLKTDVIKSRNRVKTGGPGRKKGEGINGLAAAHPDADGQLGLAQHRRASGKISSGLSDRSQSPISRTGTPNFAHPSNIAPQHMFEQALNGDAVFQPSMHGFGIPRQPSPSSLSSINGSHLEPPLSYDSLAAQNTALKTRVSEMELINDLFRNRVSELETSEGQARATEQALRAELEATQQREQALKRRIEEIEEESPRHKKMRMSDLVDESRAGSPISSMVE	280	30.2676	8.961	67.36	-0.672	0(N)	Cytoplasm|Nucleus	2	PF00320;PF25026	GATA zinc finger;Asd-4-like domain	CQNCTTSTTPLWRRDESGAVLCNACGLFLKLHGR;SYDSLAAQNTALKTRVSEMELINDLFRNRVSELETSEGQARATEQALRAELEATQQREQALKRRIEEIEEE	21;183	54;253	9e-12;1.1e-20	1	CQNCTTSTTPLWRRDESGAVLCNAC	Type IVa
278	EnsemblFungi	Ascomycota	Dothideomycetes	Pleosporales	Didymella exigua CBS 183.55	Dexi3	KAF1927633	MEAPDATRQSVGLPSINHMDTNRFKRDESEYQRKLSAQSLISPLHPRSGPSHLHGSHQSPPASAVPGSLAGLLSPPESRRTSGDEKDIYKPAAWQSLPSISEALAAEQSLPYPGPVPPPPSAPAPTPQHYARVSVNTSPSESRKRPFEPDSYSAQGPANPFSHPRSPFIGAPASQVPPPPPPQEARPPYEPRTYSTLQHNSRLPSLHPIKTTQSPPPPIVRPNPPYSSYPPAPTPAYEPPAPPPAESLNHQYGYSQPQYASYPPSAPNSAGPSAVYPASTSAYPPPSRYYPTSLRDNTESRLEEKKLNRTSLAPYGESVKRHLDSFDLEASLNEMADGCGRISEFSKMYRQRAHETQRIGMTPQSLPRLEDIEDMIKQGDRVQMSLQRMRDVVFNHQQA…	511	55.9455	9.21	49	-0.98	0(N)	Nucleus	1	PF00320	GATA zinc finger	CHSCNRAETPEWRRGPDGARTLCNACGLHYAKL	453	485	1.9e-10	1	CHSCNRAETPEWRRGPDGARTLCNAC	Type IVb
279	EnsemblFungi	Ascomycota	Dothideomycetes	Pleosporales	Didymella exigua CBS 183.55	Dexi4	KAF1927888	MAHPSGNGGTSLAPTPTHPHHLSRESSKEELEMAESLRRLNQVQDAQMSNTGSPSRERSGTPEDDQKSEIYHSLEDAVPIAGAAASPMPSTSLSFPPRSVGGGDSAPIIGQVCSNCRTTQTPLWRRSPTGETVCNACGLYIKARNQQRPVNLKRNTPSQLGVPVQQSPTPSATGKQDISPGNIASSPRVATYVAADQMASGTCPGGGRCNGTGGQQGCNGCPAFNNRVSKTAKFALQQASTSTKPADGSNENSTSGSCSGSASTSAIPACQNCGTTITPLWRRDDAGHIICNACGLYYKLHGTHRPVAMKKQEIKRRKRVVPAGDNNSQAAPSVANYSLPQRSSQNPALDGSASPDPIPSREEYTPEPRGPLAVDFTHYRNNNNNNNKLNVISNPSVHP…	496	52.5315	9.01	56.75	-0.797	0(N)	Cytoplasm|Nucleus	2	PF00320;PF00320	GATA zinc finger;GATA zinc finger	CSNCRTTQTPLWRRSPTGETVCNACGLYIKARN;CQNCGTTITPLWRRDDAGHIICNACGLYYKLHGT	113;270	145;303	7.7e-11;1.3e-12	2	CSNCRTTQTPLWRRSPTGETVCNAC;CQNCGTTITPLWRRDDAGHIICNAC	Type IVa;Type IVa
280	EnsemblFungi	Ascomycota	Dothideomycetes	Pleosporales	Didymella exigua CBS 183.55	Dexi5	KAF1928985	MNGYPYSSQPYADGTSNGGGLMDLGGGDMSAYGPGSIEGQSLDDIVSQNDSVNRRRSMPVYARQPQQPHQQPHQQPIIQMTSPTRSLSIMNFGDPNGGSLDDFAFDMSASGMEQMMRSNTFPRPTADMQPGADLAVKTQFSNAASPFSTMAAPGSNYASPIHASADLDMGMSPYPNGMNMSLDMDDSLNSMMQSDMNMFGNNHFNPQMMDSPVNINPTPINPGTDFIGPLPAPRRASNMNCGHFKSPSMSNTPDGRSGPSLPSRQNSHGQQDQSRSSREQSQHGQRPDTSNANSATQLSLSSLENQRPIAQDPTENISHDNLEHIKNKKLPWQEGPGGFPSLMHPKPHTEIQFKNAYSSSGFDMLGVLMRVATRPNPQIDIGSVDLSCAFVVCDADMDD…	1062	117.021	8.393	60.13	-0.677	0(N)	Nucleus	3	PF13426;PF08447;PF00320	PAS domain;PAS fold;GATA zinc finger	CAFVVCDADMDDIPIVYCSENFERLTGYTRHMILGRNCRFLQSPDGKVEAGIKRNYVDDDSVLYLKNTISAVTEAQISLINYRRGGQPFMNLLTMIPISWEPGGKVKFFVGFQVDL;MYLSPSSNRILEYDPSELVGTALSSVCHPSDIVPVTRELKETTNGGSVNVVFRIRRKKSGYMWFEGHGSLHTEQGK;CANCHTRTTPEWRRGPSGNRDLCNSCGLRWAKQ	388;595;939	503;670;971	5.3e-13;3.8e-08;3.6e-11	1	CANCHTRTTPEWRRGPSGNRDLCNSC	Type IVb
281	EnsemblFungi	Ascomycota	Dothideomycetes	Pleosporales	Didymella exigua CBS 183.55	Dexi6	KAF1929282	MSPGGMLDEPIFPAFGSDAAAVSPESPSELQKNDPLGTQIWKLYSRAKTQLPNAERMSNLTWRMMALNMRRAEEQRNRGPPPRTAPSGIAQQLRRSADQQAQVQQQPQQEHQPQPQPAHDTMNLDDFIFPSSVGSPAGLSPDPSNAADGPFNAGSGGVPIRKANQLNDHNLSLAHASAPPVPPLINREDEFGYVPRHVRKTSIDERRPPKRRAEASPQVPPVNSIMIPTDAQAEADLNHYSLDHSMQPPAFAASQAQVPFSIDTFQMHEDPVINSAGPFQQNFGFSPVGSPMMNHGTSFPNIFNPNSMASSLNSTDYYSPPSSAFPSAVSTPQPMNDDNQMYFDRHGMDIRSQHSSGVSYGSHRPSALSNSLQPQFVFNPNGGGPDTVFSPVTSASSSL…	826	88.3859	7.822	51.82	-0.722	0(N)	Nucleus	2	PF08550;PF00320	Nitrogen regulatory protein areA, GATA-like domain;GATA zinc finger	IWKLYSRAKTQLPNAERMSNLTWRMMA;CTNCFTQTTPLWRRNPEGAPLCNACGLFLKLHGV	40;611	66;644	7.1e-08;5e-13	1	CTNCFTQTTPLWRRNPEGAPLCNAC	Type IVa
282	EnsemblFungi	Ascomycota	Dothideomycetes	Pleosporales	Dothidotthia symphoricarpi CBS 119687	Dsym1	KAF2126939	METLEASSRPSMGLPSISHLNSEKAKREESYYQRKHPVSAMDSPLHPFAAMSHLHNNHQSSPASAIPASLAGLLSPPESRRTSGDDKEPHRSAALQSLPSIHEALGSEQPLSYASAPPSSAPVAAPQHYLPPSVTTPPSDQGTRRYPPDLHSNPGPSNPFSHPRSPFVGTSAQQHPPPPPPQSQIDPLSRQSFSEPRPPYSAPQQTPKLPSLYPIKTAQSPTLSTAQSNTPYSSYPPPPSSVYEAPAPQSARSMNHQYSYPQYPSNAPPPSGPNSVYPPAASTYSAPSRYPPAPWHDNSEVARLEEKKINHTSLAPYGDSVKRHLESFDIEASLNEIADGAGHIAEFSKVYRQRAHENQRIGMTLQSMPRLEEVDDMLKQNERVQMSLQRIRDVVHNHH…	1173	131.462	6.581	68.42	-0.666	0(N)	Cytoplasm	2	PF00320;PF03074	GATA zinc finger;Glutamate-cysteine ligase	CHSCNRAETPEWRRGPDGARTLCNACGLHYAKL;IHMDAMAFGMGSCCLQITFQAKNIEEGRKMYDQLSPLGPILLALTAATPVYKGFLADTDVRWNQISKAVDDRTPEELGEKPLKNDRWRLPKSRYASNSTYISQDPRLRPEYLDPDLIVDNDIKQRLIEGGMDDRLATHFAHLFIRDPIVVFAEDLEELDLTKADHFENLQSTNWQHMRFKPPPPGLDIGWRVEFRPMEIQITDFENAAFSIFIVLITRAILSFNLNFYIPITLVSENMETAHIRDAVSTQKFWFRKNPFSSSKTGTSTPATADSRPATPLGAVEDEYEQMTINEIINGQQSTEGGFPGLIPLVESYLNSMNVDVETRCDIATYLALIRKRADGTYWTAAKWIRHFVQTHPAYKKD…	455;773	487;1155	5.1e-10;1.4e-174	1	CHSCNRAETPEWRRGPDGARTLCNAC	Type IVb
283	EnsemblFungi	Ascomycota	Dothideomycetes	Pleosporales	Dothidotthia symphoricarpi CBS 119687	Dsym2	KAF2127731	MTYATAAPATPGGQANSPPQCQNCTTSTTPLWRRDETGSVLCNACGLFLKLHGRPRPISLKTDVIKSRNRVKAGGPGGRKKAGETNGLPAAHPNADGSLGLAQHRRVSDKLSSGLSDRSQSPISRTGTPNFALHSNIAPQHLFDGALHGEAVFHSPSLPGFGLRQPSPGSTSSINGSHLEPPLPYDTLAAQNTALKTRVSEMELINDLFRTRVNELEQSEQAARETQAKLMQEIEDLKRRLDDRDVIEDNDDRHKRPRLSDLIDESRAGTPIEAMVE	277	30.0182	7.771	71.59	-0.694	0(N)	Nucleus	2	PF00320;PF25026	GATA zinc finger;Asd-4-like domain	CQNCTTSTTPLWRRDETGSVLCNACGLFLKLHGR;YDTLAAQNTALKTRVSEMELINDLFRTRVNELEQSEQAARETQAKLMQEIEDLKRRLDDRD	21;185	54;245	1.7e-11;6.7e-19	1	CQNCTTSTTPLWRRDETGSVLCNAC	Type IVa
284	EnsemblFungi	Ascomycota	Dothideomycetes	Pleosporales	Dothidotthia symphoricarpi CBS 119687	Dsym3	KAF2128071	MSLYANSSAEMGHFSSNGLSDGLHLQQMDEVMQMDMDLSLEGADAQNAAGYAAFTGNLQTTVPGSSAASDVYSMGQDSSMTGAGAGPLPTGFGAPNMNPSGSTLTEFTKRRNWSQRVLEELRDLLHILTPDGRILYVSPSCRPLTGWEPPQLMGRFINEFIHPDDIGIFVKEFNESIASSNPLRFFYRFRKLDDTYTIFESHGHPHLSGDPTAFAPPNALNCRGFFLMARPYPTKNAALLDSFLEHKIENERLTKRVAELKREEQDEQDDWARKTEGPSTVQSDTHNTHSDAVSYAQMPPPAKPTISNTALTRQNLDEALAASRPDSINDKMARYEGANHLETIEMLTGLRYRDGERSQGISTGDASPMLIRGDAGIQISLDRDARSSSDKKKKLKIAD…	466	51.1115	5.697	63.76	-0.637	0(N)	Nucleus	2	PF08447;PF00320	PAS fold;GATA zinc finger	ILYVSPSCRPLTGWEPPQLMGRFINEFIHPDDIGIFVKEFNESIASSNPLRFFYRFRKLDDTYTIFESHGHPH;CTDCGTLDSPEWRKGPNGPKTLCNACGLRWAKKEKK	134;403	206;438	8.1e-08;1.5e-11	1	CTDCGTLDSPEWRKGPNGPKTLCNAC	Type IVb
285	EnsemblFungi	Ascomycota	Dothideomycetes	Pleosporales	Dothidotthia symphoricarpi CBS 119687	Dsym4	KAF2129426	MAHHTGRGGTSLAPTPTHPHHLSRESSRDELEMADALRRLNQVQETHGQRQEITLQEHQPDTPQTEPESKIYHSLEDAVPISQGPATPATSISSPLPPRIAGGGSAPISGQVCSNCRTTQTPLWRRSPTGETVCNACGLYLKARNQSRPVNLKRNTQTQPTVAAQQSPRPCHSETRSTSPGNLAASPRVATYVAADQMSVGTCPGGGRCNGTGGQQGCSGCPAFNNRVSKTAKFALAQAHATSGPDDSASGGTAATGLSTGTGATNAIPACQNCGTTITPLWRRDDAGHIICNACGLYYKLHGTHRPVAMKKQEIKRRKRVVPAGDTNSQPSLSLADYSPNQRASETPAFEHSASPETSTTIASREGYTPEPRGPIAIDFTHYSGVLSITPRSLAPRTS…	508	54.2266	9.049	57.78	-0.753	0(N)	Nucleus	2	PF00320;PF00320	GATA zinc finger;GATA zinc finger	CSNCRTTQTPLWRRSPTGETVCNACGLYLKARN;CQNCGTTITPLWRRDDAGHIICNACGLYYKLHGT	113;271	145;304	1.2e-10;1.4e-12	2	CSNCRTTQTPLWRRSPTGETVCNAC;CQNCGTTITPLWRRDDAGHIICNAC	Type IVa;Type IVa
286	EnsemblFungi	Ascomycota	Dothideomycetes	Pleosporales	Dothidotthia symphoricarpi CBS 119687	Dsym5	KAF2129756	MNGYPYPSRPFPANSNGPGIMAMGPDAMDTYDAQESQSLDDIVSQNNKANRRQSIPVYARAQHQHMHLQSPESRRLSMLSFGDPNARDMDGFQFDMSPSTAMDGMMRTSTSFPRTASAMHNPRNTPAGLAINTQFANNTSPYGAMPAPPSAYASPMHPDVALDMDMSPYPTNMNMPLDMDDSLNMMPADMNMYQNNQFNSPMMGSPLNPDVVRPMPVPRQDANMSAMQPRDRFKSESQSATPEARSVSGPPAHLSRSSSQDQSSICSTSRPQSVQHSSSKGADFPTQMSITSLKNQQPVAQNPEIDLPRDKLDKLQNLVNNNLPWATPQGGFPSTMNSNPHMKTQFKNAYSSTGFDMLGVLIRVATRQNPQIDIGSVDLSCAFVVCDASMDDVPIVYCS…	1064	117.468	8.998	61.15	-0.648	0(N)	Nucleus	3	PF13426;PF08447;PF00320	PAS domain;PAS fold;GATA zinc finger	AFVVCDASMDDVPIVYCSDNFERLTGYTKHMILGRNCRFLQSPDGKVESGVKRKYVDDDSVLYLKNTITARTEAQISLINYRRGGQPFMNLLTMIPIPWEPGGPIKFFVGFQVDL;MYLSPSSNRILEYEPSELIGTALSSVCHPSDIVPVTRELKETSNGGSVNVVFRIRRKKSGYMWFEGHGSLHTEQGK;CANCHTRTTPEWRRGPSGKRDLCNSCGLRWAKQ	382;588;936	496;663;968	1.4e-12;3.3e-08;6e-11	1	CANCHTRTTPEWRRGPSGKRDLCNSC	Type IVb
287	EnsemblFungi	Ascomycota	Dothideomycetes	Pleosporales	Dothidotthia symphoricarpi CBS 119687	Dsym6	KAF2131130	MDLHSLPPSRAALLPADEAARRGVLEDSMFPSLGNDAGSPSVESPQEMQKNDPLGTQIWKLYSRAKTQLPNAERMENLTWRMMAMNMRRAELDRNKWSSQGSMDMLMPPPTASVNMNMNMDVSTGTGAGTRPAPSTAPSGIAQQLRKSVDRQAHAQQPQSDAMNLDDFIFPSSVGSPAGLSPHMSEEVVGPFNATAPAIPIRKPHQASDHNLSLARASAPSVPPLVGRENDFGYVPRHVRKTSIDERRPPKRRAEASPQVPPVNSIMIPTDAQQEADLHHYSLDQPMHPPHFPASQSHVPYSIDTFQMHDDPIVNSAGPFQQNFGFSPVGSPLMNHNHNASYSNMFNPNSIASSLNSTDYYSPPSSAFPSTVSTPQPIPDDNHMYFDRTGMDIRGQHTA…	866	92.7639	7.456	51.34	-0.698	0(N)	Nucleus	2	PF08550;PF00320	Nitrogen regulatory protein areA, GATA-like domain;GATA zinc finger	IWKLYSRAKTQLPNAERMENLTWRMMAM;CTNCFTQTTPLWRRNPEGHPLCNACGLFLKLHGV	58;650	85;683	3.1e-09;6.7e-13	1	CTNCFTQTTPLWRRNPEGHPLCNAC	Type IVa
288	EnsemblFungi	Ascomycota	Dothideomycetes	Pleosporales	Epicoccum nigrum str. ICMP 19927	Enig1	OSS44940	MAHPSGSGGTSLAPTPTHPHHLTRESSKEELEMAESLRRLHQVQDTHMSNTGLPLKEQQVSGTPQDDQNPEIYHSLEDAIPIAGASASPAPTTSLSLPLQNASGSSAPIIGQVCSNCRTTQTPLWRRSPTGETVCNACGLYIKARNQQRPVNLKRNTPSQANFTVQQSPVPNAAAEQDVSPGNLAASPRVATYVAADQMAAGTCPGGGRCNGTGGQQGCSGCPAFNNRVSKTAKFALQQANASPKPREGANNSGTTGSCSGSASTSAIPACQNCGTTITPLWRRDDAGHIICNACGLYFKLHGTHRPVAMKKQEIKRRKRVVPAGDTSSQAAPSVANYSPPLRTSQTPAGSASPDPIESREQYTPEPRGPLAVDFTHYRDTNKLNVTSIPSAHPGAPSP…	498	52.722	8.942	60.48	-0.695	0(N)	Nucleus	2	PF00320;PF00320	GATA zinc finger;GATA zinc finger	CSNCRTTQTPLWRRSPTGETVCNACGLYIKARN;CQNCGTTITPLWRRDDAGHIICNACGLYFKLHGT	114;271	146;304	7.8e-11;1.3e-12	2	CSNCRTTQTPLWRRSPTGETVCNAC;CQNCGTTITPLWRRDDAGHIICNAC	Type IVa;Type IVa
289	EnsemblFungi	Ascomycota	Dothideomycetes	Pleosporales	Epicoccum nigrum str. ICMP 19927	Enig2	OSS46586	MNGYQYSSQSYADQPTNGGGMMDLGAAGMSAYGPGGTEGQSLDDIVSQNDKANRRRSMPVYRRQSSQQQQQQQQQQQQQQPQHSQGMHMGSPTRSLSMMNFGDPNGAAMDDFAFDMSTAAGMDNMMRSNAYPRSSADMQSGADLAIKTQFNNAAQPFSNMAAPGSNYASPIHTHADLDMGMSPYPNNMNMSLDMDDSLNSMMQSDMHMFGNSQFGSQMLNSPINTNNTPISTNNTPVNTNNTPINQGADFIGPLPAPQRTSQLVGQHQYDGMSSQDRSQSQNHVQDPMKSPSMNNTPDARSGQSNASLLSRHNSGMDQSRSSREQSHHQSDNKNNTSAATQLSLTSLDHQRPIAQDPTLDLPNQKLEQIKNSKLPWPEPPGGFPSTMHAKPHMQTQFKN…	1110	122.479	8.658	57.31	-0.76	0(N)	Nucleus	3	PF13426;PF08447;PF00320	PAS domain;PAS fold;GATA zinc finger	VVCDTEMDDCPIVYCSENFERLTGYTRHMILGRNCRFLQSPDGKVEAGIKRNYCDDDSVLYLKNTISAATEAQISLINYRRGGQPFMNLLTMIPISWEPGGKVKFFVGFQVDL;MYLSPSSNRVLEYDPSELVGTALSSVCHPSDIVPVTRELKETTNGGSVNVVFRIRRKKSGYMWFEGHGSLHTEQGK;CANCHTRTTPEWRRGPSGNRDLCNSCGLRWAKQ	435;639;988	547;714;1020	1.8e-13;1e-07;3.8e-11	1	CANCHTRTTPEWRRGPSGNRDLCNSC	Type IVb
290	EnsemblFungi	Ascomycota	Dothideomycetes	Pleosporales	Epicoccum nigrum str. ICMP 19927	Enig3	OSS50552	MDFDMRRESSPEPSPGGMLDEPIFAAFGNDASAVSPESPTELQKNDPLGTQIWKLYSRAKTQLPNAERMSNLTWRMMALNMRRAEEQRNRGSSSMSQSQSQSHEQPAPPSASASASAGGSARPSLRTAPSGIAQQLRSAADQQMQVHQPPQAHDTMNLDDFIFPSSVGSPAGLSPDPSHGAEGPFSAAGPGVPIRKANQLHDHNLSLAHASAPPVPPQINRENEFGYVPRHVRKTSIDERRPPKRRAEASPQVPPVNSIMIPTDPQSEADLHHYSLDHSMQPPAFPASQAQVPFSIDTFQMAEDPVINSAGPFQQSFGFSPVGSPMMNHGTSFTNIFNQNSMASSLNSTDYYSPPSSAFPSAVSTPQPMNDDSQMYFDRHGMDIRSQHSSGVSYGSHRP…	860	91.4901	7.134	48.55	-0.708	0(N)	Nucleus	2	PF08550;PF00320	Nitrogen regulatory protein areA, GATA-like domain;GATA zinc finger	IWKLYSRAKTQLPNAERMSNLTWRMMA;CTNCFTQTTPLWRRNPEGAPLCNACGLFLKLHGV	52;645	78;678	7.4e-08;5.2e-13	1	CTNCFTQTTPLWRRNPEGAPLCNAC	Type IVa
291	EnsemblFungi	Ascomycota	Dothideomycetes	Pleosporales	Epicoccum nigrum str. ICMP 19927	Enig4	OSS51445	MEAPDVGRQSVGLPSINHMEPNRFKREEGDYQRKLSTPAMVSPLHPHSAPAHSHGTHQSPPVGTKPGSLAGLLSPPESRRTSGDEKETYKPAARQSLPSISEALGAPEQSLPYAGPVPPPPSVPAPTSQHYAPTPANISPSESRKRPFEPDSYSAQGPPNPFSHPRSPFVSGSAQVPPPPPPPQSQLDSQTRPPYEPHPPYSTAQHNPRLPSLHPIKTTQSPTPLVTRPTLPYSSYPSAPPAVYDSPAPQPTEHVNHQYGYSKPPYASYPPPAPAPSGPPAAYPPHTSAYSAQPRYYPTSLRDNTEARLEEKKLNRASLAPYGESVKRHLDSFDLEASLNEMADGCGRISDFSKAYRQRAHENQRIGMTPQSIPRLEEIDEMMKQSERVQMSLQRMRDV…	518	56.6243	9.191	49.27	-0.965	0(N)	Nucleus	1	PF00320	GATA zinc finger	CHSCNRAETPEWRRGPDGARTLCNACGLHYAKL	460	492	1.9e-10	1	CHSCNRAETPEWRRGPDGARTLCNAC	Type IVb
292	EnsemblFungi	Ascomycota	Dothideomycetes	Pleosporales	Epicoccum nigrum str. ICMP 19927	Enig5	OSS52360	MYPTQNGGGEMSGNAHHPPPPQQQQLTHNQQHAQQRQQQQQHSQQFASAPSRPPAYSAHSAHSVHSVHSSATAPHGLSSVSDFDGLHMPMALMDSSAMALPLNMDMDMDMDMDMSLADDGGSSINGGYTPFLSHAQPSQQQQQQQQTPTGSTPGGASNGHGLGPLHDMGMNMNMSMSMSGAGAGPLPTGFGAPSMNPSGSTLTEFTKRRNWSQRVLEELRDLLHILTPNGRILYVSPSSKALTGWDPAQLMGRFINEFIHPDDIGIFVKEFNESIASGNTLRFFYRFRKADDSWGIFESHGHPHLSSDPSSFAPPNALNCRGFFIMARPYPTKNAALLDSFLEHKIENERLTKRIAELKREEQDEQDEWTKKDQQSQSGAPSESVVTQPPNQQDSAYHQ…	566	61.9302	6.239	55.09	-0.785	0(N)	Nucleus	2	PF08447;PF00320	PAS fold;GATA zinc finger	ILYVSPSSKALTGWDPAQLMGRFINEFIHPDDIGIFVKEFNESIASGNTLRFFYRFRKADDSWGIFESHGHPHLS;CTDCGTLDSPEWRKGPNGPKTLCNACGLRWAKKEKK	232;505	306;540	5.4e-09;1.9e-11	1	CTDCGTLDSPEWRKGPNGPKTLCNAC	Type IVb
293	EnsemblFungi	Ascomycota	Dothideomycetes	Pleosporales	Epicoccum nigrum str. ICMP 19927	Enig6	OSS53029	MGHRRAHARYTRRSLAAELHSKEFDRYNSLRSAPRFSPTSTTASALATSILPRPQAHETFRRPSILQAFDLPAIRTTSPPAFDRTTLPSISPELVGRDISRPSSSCSTVASFSHSHPPLQRQGSNASLQLPALSTLASLSSPNTTVKEGEDSARRDSKMPGPSPSNPSHGLSMTYATAAPATAGGQGNSPPVCQNCTTSTTPLWRRDESGAVLCNACGLFLKLHGRPRPISLKTDVIKSRNRVKTGGPGRKKGEAINGLAAAHPDADGQLGLAQHRRASGKISSGLSDRSQSPISRTGTPNFAHPSNIAPQHMFEQALSSDAVFHPSFGLRQPSPGSTSSLNGSHLEPPLSYDSLAAQNTALKTRVSEMELINDLFRNRVSELETSESQARATEASLRA…	448	48.3986	9.806	65.69	-0.647	0(N)	Cytoplasm|Nucleus	2	PF00320;PF25026	GATA zinc finger;Asd-4-like domain	CQNCTTSTTPLWRRDESGAVLCNACGLFLKLHGR;SYDSLAAQNTALKTRVSEMELINDLFRNRVSELETSESQARATEASLRAELEAVQQRERELKRRIEEIEEE	193;351	226;421	1.7e-11;1.4e-20	1	CQNCTTSTTPLWRRDESGAVLCNAC	Type IVa
294	EnsemblFungi	Ascomycota	Dothideomycetes	Pleosporales	Exserohilum turcica Et28A	Etur1	EOA87651	MAHPSAIGGTALAPTPTHPHHLSRETSRDELDMADSLRLLNQAHEHQKPSVETPSQEPQPIHAPDDQTSEIYHSLEDAVPIADAPPAPSPSASLQMPNMAYEPPNAPVTGQVCSNCKTTQTPLWRRSPTGETVCNACGLYMKARNQSRPVNLKRNTQTQPMMPVQQSPTPGPSDANRPSPGSVAASPRVATYVAADQMAAGTCPGGGRCNGTGGQQGCSGCPAFNNRVSKTAKFALAQANAGSGDNRSGNDANSPASASTSAIPACQNCGTTITPLWRRDDAGHIICNACGLYYKLHGTHRPVAMKKQEIKRRKRVVPATDTSSQAASSVANYSPPQRPSQPPAFEHSVSPDPSTALESREEYTPEPPRGPLAVDFTHYYSNATVTSNPVGLVASGQPG…	499	53.2133	7.207	54.87	-0.791	0(N)	Nucleus	2	PF00320;PF00320	GATA zinc finger;GATA zinc finger	CSNCKTTQTPLWRRSPTGETVCNACGLYMKARN;CQNCGTTITPLWRRDDAGHIICNACGLYYKLHGT	113;266	145;299	3.7e-11;1.3e-12	2	CSNCKTTQTPLWRRSPTGETVCNAC;CQNCGTTITPLWRRDDAGHIICNAC	Type IVa;Type IVa
295	EnsemblFungi	Ascomycota	Dothideomycetes	Pleosporales	Exserohilum turcica Et28A	Etur2	EOA87788	MTYATSAPATAGGQAGSPPVCQNCSTSTTPLWRRDETGAVLCNACGLFLKLHGRPRPISLKTDVIKSRNRVKTGGPGGRKRTSDQGGLPAAHPDADGQLALAQHRRASGKMSSGLSDRSQSPISRTGTPNFNHPSNIAPQHMFEQALHGDFHSPSLPGFGLRAPSPATSSVNGSHLEAPLPYETLAAQNTALKTRVSEMELINDLFRNRVSELEQSEQSARQTETTLRKELDEVKQREADLKRRLEEIENESPRHKRMKMSEFVDESRAGTPINAMVD	278	30.2555	9.134	62.91	-0.751	0(N)	Nucleus	2	PF00320;PF25026	GATA zinc finger;Asd-4-like domain	CQNCSTSTTPLWRRDETGAVLCNACGLFLKLHGR;YETLAAQNTALKTRVSEMELINDLFRNRVSELEQSEQSARQTETTLRKELDEVKQREADLKRRLEEIENE	21;182	54;251	8.5e-12;3.6e-22	1	CQNCSTSTTPLWRRDETGAVLCNAC	Type IVa
296	EnsemblFungi	Ascomycota	Dothideomycetes	Pleosporales	Exserohilum turcica Et28A	Etur3	EOA89800	MNGYPYPTRPYSQAGNGPMMMSMESDAINGFDMSEGQSLDSMVAQNDKENRRRSMPPYARGPPQMTLGSPDTRRLSMMNFGDPNGGDMDDFRFDMSSATMENLMHSANNSATPAFPRSTGDMHTDQLPATDLAINNQFQGQASPFAHMAAPGSAYASPMHQKNSLDLDMSSYQNGINMSLDMDDSLNMMPADMNMFPGNQFNSPMLGSPLNQDFAGPMPPAPQDTNSNSNNTPNPQSQDQFKRPSVNNTPEVKSGRAGFLSRTVSQDQSSMRSTPRSQSERHSSNSVPTRMTMASLHNQQPIAQDPTQDLPKEVLNKHYRNGNVPPWPTPAGGFPSTMHQNPHMKTQFKNAYSSTGFDMLGVLMRVASRPDPQIDIGSVDLSCAFVVCDAELDDIPIVY…	1080	119.15	8.706	56.44	-0.735	0(N)	Nucleus	3	PF13426;PF08447;PF00320	PAS domain;PAS fold;GATA zinc finger	AFVVCDAELDDIPIVYCSENFERLTGYTRHMILGRNCRFLQAPDGKVESGIKRNYVDDDSVYYLKNMIESRSEAQISLINYRRGGQPFMNLLTMIPIAWEPGGKTKFFIGFQVDL;LYLSPASNRILEYDPSELVGTALSSVCHPSDIVPVTRELKETTNGASVNVVFRIRRKKSGYMWFEGHGSLHTEQGK;CANCHTRQTPEWRRGPSGNRDLCNSCGLRWAKQ	384;591;948	498;666;980	2.5e-12;1e-07;3.3e-11	1	CANCHTRQTPEWRRGPSGNRDLCNSC	Type IVb
297	EnsemblFungi	Ascomycota	Dothideomycetes	Pleosporales	Exserohilum turcica Et28A	Etur4	EOA90664	MEISSAQDSARRGVLQDAIFPAFGNDAGAPGPDADSPEQMQKNDPLGTQIWKLYSRAKTQLPNAERMENLTWRMMAMNMRRAEMDRNKGPGQNTQSSDMMPPPAATTTTTTTSPRPPPRSAPSGIAQQLRKSQDHHQAHGDHHHHHHYHQQQTHDAMNLDDFIFPSSVGSPAGLSPEVSNEDAAPFIATAPAIPIRKPHLASDHNLSLARASAPSVPPAIKREDEFDYIPRHVRKTSIDERRPPKRRAEASPLVPPVNSIMIPTDANAEADLHHYSLDHNTMQPPPFPASQGQGQGPFSIDTFQMHEDPVVHSAGPYQQTFSGFSPVGSPLMSHNAFNSNMFNHNSMASSLNSTDYYSPPSSAFPSNVSTPQPIPEDNKMYFDRSGLDIRTSQHGASGY…	865	92.7322	7.276	49.39	-0.779	0(N)	Nucleus	2	PF08550;PF00320	Nitrogen regulatory protein areA, GATA-like domain;GATA zinc finger	IWKLYSRAKTQLPNAERMENLTWRMMAM;CTNCFTQTTPLWRRNPEGHPLCNACGLFLKLHGV	50;647	77;680	3.1e-09;6.7e-13	1	CTNCFTQTTPLWRRNPEGHPLCNAC	Type IVa
298	EnsemblFungi	Ascomycota	Dothideomycetes	Pleosporales	Exserohilum turcica Et28A	Etur5	EOA91393	MHPHRPDLNGLPMDDVMQHMDLDMSSLDGAEGQNGAFAFADPPMHQSTVPPNSTMGTEMQMTGAGAGPLPTGFGAPNMNPSGSTLTEFTKRRNWSQRVLEELRDLLHILTPDGRILYVSASCKVLTGWEPSHIMGRFINEFIHPDDIGIFVKEFNESIASGNPLRFFYRFRKTDDTWIIFESHGHPHLSSDTNTFAPPNSINCRGFFMMARPYPTKNAALLDSFLEHKIENERLMKRIAELKREEQDEQDDWVRKAECATASMTPSESHVTQTMSQADAVSYAQMPPPAKPVISNTALTRQNLDEALAASKPDSINDKMARYEGANHLETIEMLTGLRYRDGERSQGISTGDVSPNLIRGDAGIQISLDRDGRNSSDKKKKLKIADEYVCTDCGTLDSP…	456	50.5904	6.028	59.98	-0.665	0(N)	Nucleus	2	PF08447;PF00320	PAS fold;GATA zinc finger	ILYVSASCKVLTGWEPSHIMGRFINEFIHPDDIGIFVKEFNESIASGNPLRFFYRFRKTDDTWIIFESHGHPHLSSD;CTDCGTLDSPEWRKGPNGPKTLCNACGLRWAKKEKK	115;390	191;425	3.5e-09;1.4e-11	1	CTDCGTLDSPEWRKGPNGPKTLCNAC	Type IVb
299	EnsemblFungi	Ascomycota	Dothideomycetes	Pleosporales	Lentithecium fluviatile CBS 122367	Lflu1	KAF2677154	MPHSSGSGGTSLAPTPTHPHHLSREPSREDVEMAEQLSQLNQSHDSQATRITSPSRHQNPATPPAAESSEIYHSLEDAVPLRKSEQPETAPNPATPASLPPPSIAGGNAPMTGQTCHNCGTTRTPLWRRSPTGETICNACGLYLKARNQSRPANMKRNTSTQPAASVQQSPAPGQCHDRSNSPGNATTSPRVATYVTADQGAAGTCPGGGRCNGMGGQQGCNGCPAFNNRVSKTAQFALAQTNAGTSSDATMGEAPTASTSTSVIPACQNCRTTVTPLWRRDEAGHTICNACGLYYKLHGTHRPVEMKKQEIKRRKRIVPADPSNSTQAPSSVASYSPQMRETETPVFEHSVSPDPSTAIDSSENYPPAPRIPVAVDFTNYRSTTAHLGEPPTPVTTYP…	501	53.6075	8.211	49.02	-0.875	0(N)	Nucleus	2	PF00320;PF00320	GATA zinc finger;GATA zinc finger	CHNCGTTRTPLWRRSPTGETICNACGLYLKARN;CQNCRTTVTPLWRRDEAGHTICNACGLYYKLHGT	116;268	148;301	3.7e-10;1.5e-11	2	CHNCGTTRTPLWRRSPTGETICNAC;CQNCRTTVTPLWRRDEAGHTICNAC	Type IVa;Type IVa
300	EnsemblFungi	Ascomycota	Dothideomycetes	Pleosporales	Lentithecium fluviatile CBS 122367	Lflu2	KAF2681067	MYRNGGPLRAAEMAGLAPMPGLPTDQAPDLSMGLDEMMPMEMDLSQLEADGTTPNATPTAAAFAPFQQQLQSAGPSGTPSSDVYALAAQEGTMTGAGAGPLPTGFGAPNMNPSGSTLTEFTKRRNWSQRVLEELRDFLHILTPDGRILYASPSCKALTGWDPEQLIGRWVGEFIHPDDSGIFVKEFNESIASGNPLRFFYRFRKMDETWAIFEAHGHPHLSSDASAYAPPNTINCRGFFMMARPYPTKNAALLDSFLEHKIENERLMKRIAELKREEQEEQDMSERHWQQKSEAMSSVPPSETHGRPESESAAAAYNAMPPPAKPVISNTALTRQNLDEALAASKPDSINDKMARYEGATHLETIEMLTGLRYRDGERSQGISTGEHSPMLIRGDAGIQ…	480	52.6976	5.588	59.12	-0.654	0(N)	Nucleus	2	PF08447;PF00320	PAS fold;GATA zinc finger	ILYASPSCKALTGWDPEQLIGRWVGEFIHPDDSGIFVKEFNESIASGNPLRFFYRFRKMDETWAIFEAHGHPHLSSD;CTDCGTLDSPEWRKGPNGPKTLCNACGLRWAKKEKK	147;424	223;459	2.2e-09;1.5e-11	1	CTDCGTLDSPEWRKGPNGPKTLCNAC	Type IVb
301	EnsemblFungi	Ascomycota	Dothideomycetes	Pleosporales	Lentithecium fluviatile CBS 122367	Lflu3	KAF2684113	MTYATAAPATAGGQANSPPQCQNCTTSTTPLWRRDESGSVLCNACGLFLKLHGRPRPISLKTDVIKSRNRVKTGAPGGRKKPAEANGLPAAHPDADGSLGFAQHRRASGKMSSGISDRSQSPISRTGTPLLGHPSNIAPQHMFDGVLHDGVFHSPSMPNFALRQPSPGASSMNGAHLEPPLPYDTLAAQNTALKTRVNELEVINDLFRGRVSELENTEQGAREREAQLRAELEEVKLREADLKRRLEEYDEGPRHKKMRLSDLVDESRAGSPINSLTE	278	30.1094	8.927	67.84	-0.702	0(N)	Nucleus	2	PF00320;PF25026	GATA zinc finger;Asd-4-like domain	CQNCTTSTTPLWRRDESGSVLCNACGLFLKLHGR;YDTLAAQNTALKTRVNELEVINDLFRGRVSELENTEQGAREREAQLRAELEEVKLREADLKRRLEEYD	21;183	54;250	7.8e-12;2.7e-22	1	CQNCTTSTTPLWRRDESGSVLCNAC	Type IVa
302	EnsemblFungi	Ascomycota	Dothideomycetes	Pleosporales	Lentithecium fluviatile CBS 122367	Lflu4	KAF2685514	MNGSYAYKGYPQRPFAQNNGENIIDHSGDGLNTFMGDGQSLDDIVLQNEKENRRQSMPVFGGTEMQMGSPDSRRLSMLQFGDSATMEDFQFDGGMDGLIRSGTYPRTTGEMQNERGPVSDLVINTQFTNGNSPFSNIPAYASPMHPNANMDMEMTSPYPDMSLPIDDSLMMGRSDMNMFPNTQFTAPMMDSPVTQDFSSLPTAPTQDPNLSMPPPDQYRSNSSSATPDARSKGPTPASSQDQSSMRSGSRPQSEHQTSSNSVPNQMADASMKNQEPIALPTGQDLPPESFNHIKFPWAVPTGGFPSTRTQNPHMQTQFKNAYSSTGFDMLGVLMRVATRANPQIDIGSVDLSCAFVVCDAEKDDQPIVYCSENFERLTGYSKHMILGRNCRFLQSPDGK…	1030	113.975	7.923	58.69	-0.727	0(N)	Nucleus	3	PF13426;PF08447;PF00320	PAS domain;PAS fold;GATA zinc finger	AFVVCDAEKDDQPIVYCSENFERLTGYSKHMILGRNCRFLQSPDGKVEPGVKRRYVDDDSVYYLKQMTLRQHEAQISLINYRRGGQPFMNLLTMIPIPWDSGSKIKFIVGFQVDL;LYLSPSSNRVLEYDPSELVGTALSSVCHPSDIVPVTRELKETSNGASVNVVFRIRRKKSGYMWFEGHGSLHTEQGK;CANCHTRATPEWRRGPSGNRDLCNSCGLRWAKQ	354;559;907	468;634;939	4.8e-11;2.8e-07;6e-11	1	CANCHTRATPEWRRGPSGNRDLCNSC	Type IVb
303	EnsemblFungi	Ascomycota	Dothideomycetes	Pleosporales	Lentithecium fluviatile CBS 122367	Lflu5	KAF2686730	MEAVDAASRQSFGLPSLSNLDQDRIKREDADSQRKHSMVSPLHPFSNHQSSPASAAPGPLGGLLSPPESRRTSGDEKDQQRAPARQSLPSIHEALGRPEPPLVFAAPAPVPPPSVPASAAQSYFPPPPTTTSPTDHRARAFSSDFHGSQGPGNPFSHPRSPFISNTSTSTAPPPPPPQAQSDAGSRPSFSEARPSYSEPRQSYSSPRPSFSAPQQNPKLPTLHPLRTNQSPPPGPGRPNAPYSSYPPHQSPAYESSGPHSAGPMNPNYGYSQYPPNYPLSAPTQSTPNSQYPPSAATYSAPPRPYPGAPSWPESRLEEKKISRSSLAGYGESVKRHLESFDLEASLNEMAEGAGTISDWSKIYRQRAHENQRIGMTPQSMPRLQEVDNMLKNSELIRVA…	1189	132.69	6.723	62.99	-0.732	0(N)	Cytoplasm|Nucleus	2	PF00320;PF03074	GATA zinc finger;Glutamate-cysteine ligase	CHSCNRAETPEWRRGPDGARTLCNACGLHYAKL;IYMDAMAFGMGSCCLQITFQAKNIEEGRKMYDQLSPLGPILLALTAATPIYKGFLADTDVRWNQISRAVDDRTPEELGEKPLKSDRWRLPKSRYASNSTYISQDPRLRPEYLDPDLVIDPVLKQRLVDGGMDDLLATHFAHLFIRDPIVVFAEDLQSLDLTKADHFENLQSTNWQHMRFKPPPPGSDMGWRVEFRPMEIQITDFENAAFSIFIVLITRAILSYNLNFYIPIARVSENMETAHIRDAVNSQTFWFRKDPFSAHASSRPTTGTGTSTPAELSRPPSPTGPVEDEYEQMTINEVINGQQSSSGDSGFPGLIPLVESYLNSMNVDVETRCELARYLDLIRKRADGTYWTAAKWIRHFVQ…	468;781	500;1171	5.2e-10;2.1e-170	1	CHSCNRAETPEWRRGPDGARTLCNAC	Type IVb
304	EnsemblFungi	Ascomycota	Dothideomycetes	Pleosporales	Lentithecium fluviatile CBS 122367	Lflu6	KAF2689082	MATSSSPAHQWPRFDSSSAANAPFQHQQQHSHQHHDSALDKLAFTPPVPAVRKGMLADSIFPALKNDADGADMGSPEEMQKNDPLGTQIWKLYSKARTQLPNAERMENLTWRMMALNMRRAAERERNKGRAQRDQMKPPPTTAAPAPRPALRSAPSGIAQLRQSVDEKAQTLAASGAGDAMNLDDFIMPSSVGSPAGLLDEPPNEMRAPSHATAPAIPIRKANQSHDQNLALAHASAPPVPPIVTREHEFGYVQRHVRKTSIDERRPPKRRAEASPQVPPVNSIMIPSNPEDEVALHHYSLDQSSMQPHTFNTPQPQVPFSIDTFQLHEDPIISSAGPFQQNFSFSPVGSPLMTQNPSYSNLYQPNSMASSLNSTDYYSPPSSAFPSTVSTPQPMNEDN…	888	95.0341	9.024	50.77	-0.759	0(N)	Nucleus	2	PF08550;PF00320	Nitrogen regulatory protein areA, GATA-like domain;GATA zinc finger	IWKLYSKARTQLPNAERMENLTWRMMA;CTNCFTQTTPLWRRNPEGHPLCNACGLFLKLHGV	89;668	115;701	3.1e-09;6.9e-13	1	CTNCFTQTTPLWRRNPEGHPLCNAC	Type IVa
305	EnsemblFungi	Ascomycota	Dothideomycetes	Pleosporales	Leptosphaeria maculans	Lmacu1	CBX93031	MDIAMPEGAMEYKDAPPAAVNDESARRGLLDDAIFPAFGNDAGSPSVESPEQMQKNDPLGTQIWKLYSRAKTQLPNAERMENLTWRMMAMNMRRAEMDRNKGHSHQSHQSRQSRQSSQSSQHNSSGNMPPPAVSASATPRPQPRTAPSGIAQQLRKSAGYQQQEQQQQQQQQQQQQQQQQSQQQQQQHQQVQQHPSHHHGLDSMNLDDFIFPSSVGSPAGLSPGPDLSTNEDAAPFNAIAPAIPIRKPNLANDHNLALARASAPSVPPTIHRENEFGYVHRHVRKTSIDERRPPKRRAEASPQVPPVNSIMIPTDAQAEADLHQYSLDQHSHHDQHNMQPPTFPASQAQAPFSIDTFQMPEDPIINSAGPFQQNFGFSPVGSPLMNHNAFGQNMFNPTS…	925	99.5083	7.259	48.43	-0.84	0(N)	Nucleus	2	PF08550;PF00320	Nitrogen regulatory protein areA, GATA-like domain;GATA zinc finger	IWKLYSRAKTQLPNAERMENLTWRMMAM;CTNCFTQTTPLWRRNPEGHPLCNACGLFLKLHGV	63;700	90;733	3.3e-09;7.2e-13	1	CTNCFTQTTPLWRRNPEGHPLCNAC	Type IVa
306	EnsemblFungi	Ascomycota	Dothideomycetes	Pleosporales	Leptosphaeria maculans	Lmacu2	CBX93697	MAQPSGSGGTSLAPAPTHPHHLSREASRDELEMADSLRRLNQAHDNATKVDAPSYEPAPATPHEDQRPEIYHSLEDAVPIAEEQTTPVTQASVQTPSRAFEGLATPVAGQICSNCRTTQTPLWRRSPTGETLCNACGLYMKARNQSRPVNLKRNTQTQPFNPVQSSSASSPTENSGTSPGNLAASPRVATYVAADQMSAGTCPGGGRCNGTGGQQGCSGCPAFNNRVSKTAKFALAQAHAVSQPNSSTNKGDGSAPTTSNGTSSTSAIPACQNCGTTITPLWRRDDAGHIICNACGLYYKLHGTHRPIAMKKQEIKRRKRIVPASDTGSQAPSSIADHSPPPRSSQTPALESSVSPDPSTALDSKEGGEDYAPEPRGPLAVDFTHYYRNASITSHPSIP…	511	54.5515	7.965	53.23	-0.839	0(N)	Nucleus	2	PF00320;PF00320	GATA zinc finger;GATA zinc finger	CSNCRTTQTPLWRRSPTGETLCNACGLYMKARN;CQNCGTTITPLWRRDDAGHIICNACGLYYKLHGT	112;271	144;304	2.2e-11;1.4e-12	2	CSNCRTTQTPLWRRSPTGETLCNAC;CQNCGTTITPLWRRDDAGHIICNAC	Type IVa;Type IVa
307	EnsemblFungi	Ascomycota	Dothideomycetes	Pleosporales	Leptosphaeria maculans	Lmacu3	CBX97731	MALYQNGGAEMGLGQMTGLPMHPQQQQQQQQQQQQQQQQQQQQQQQQQQQQQQQQQQQHQQQQQQQQQHHQQQQQHHHLQHQHQQHQLQQLTPQGADLGGLPMDDVLHMDMDMSSLDGGDGQGAAFSFSDPPMQNSVPVTSNNMGDMQLTGAGAGPLPTGFGAPNMNPSGSTLTEFTKRRNWSQRVLEELRDLLHILTPDGRILYVSPSCKPLTGWDPAQLMGRFINEFIHPDDIGIFVKEFNESIASGNPLRFFYRFRKADESWIIFESHGHPHLSADSSSYAPPNTINCRGFFMMARPYPTKNAALLDSFLEHKIENERLMKRIAELKREEQDEQDDWAKQTGDNSTAMTPSETHVTQSVSQADAVSYAQMPPPAKPVISNTALTRQNLDEALAASK…	543	60.5996	5.981	56.67	-0.916	0(N)	Nucleus	2	PF08447;PF00320	PAS fold;GATA zinc finger	ILYVSPSCKPLTGWDPAQLMGRFINEFIHPDDIGIFVKEFNESIASGNPLRFFYRFRKADESWIIFESHGHPHLSAD;CTDCGTLDSPEWRKGPSGPKTLCNACGLRWAKKEKK	203;478	279;513	1.3e-10;2.6e-11	1	CTDCGTLDSPEWRKGPSGPKTLCNAC	Type IVb
308	EnsemblFungi	Ascomycota	Dothideomycetes	Pleosporales	Leptosphaeria maculans	Lmacu4	CBX98033	MCFPPPAPVPDVPCRLSLLAASTLQIQGTGRVARSSAPFPCPSPKEKSAAMPNTILFSVRSPPSPQSEHGPWPAKTTIVHDLLFTRPHESEDYLVQRATTMNGHGFPYPSRPYPAAHNPSAMMDMTADGMSAFDMEGQSLDSIVAQNDKENRRRSMPVYSRAPQLNMGSPDTRRLSMMNFGDPNGGEMDDFQFDMSSASMDNMIRANSAFPPTSADMQGERMPTTDLAMNTPFQSQNSPFSAMAGPGSAYASPMHQKETLNLDMAAYPSGMSMPLDMDDSLNMMPTEMNMFPNTQFSTPMMDSPVSQEFVGPLNASSHDNNAAPLRRPELFKHQSSMSHASESRPAGALLSRTTSQDLGNRSGPRPQSEKHSSMSVPTRMSLNSLQVQQPIAQEPAMDL…	1153	127.072	8.602	59.82	-0.617	0(N)	Nucleus	3	PF13426;PF08447;PF00320	PAS domain;PAS fold;GATA zinc finger	AFVVCDAEMDDIPIVYCSENFERLTGYTRHMILGRNCRFLQSPDGKVESGIKRNYVDDDSVYYLKKMIQSRAEAQISLINYRRGGQPFMNLLTMIPIAWEPGGKVKFFVGFQVDL;LYLSPASNRILEYDPSELVGTALSSVCHPSDIVPVTRELKETTNGASVNVVFRIRRKKSGYMWFEGHGSLHTEQGK;CANCHTRTTPEWRRGPSGNRDLCNSCGLRWAKQ	472;679;1029	586;754;1061	2.2e-12;1.1e-07;4e-11	1	CANCHTRTTPEWRRGPSGNRDLCNSC	Type IVb
309	EnsemblFungi	Ascomycota	Dothideomycetes	Pleosporales	Leptosphaeria maculans	Lmacu5	CBX98642	MESVEASNRHSIGLPSISHLESDRVKREEMDYQRKQHAAASTMPSPLHPYSGPSHLHSNHQPPPATSAPGSLGGLLSPPDSRRTSGDEQESQRPTARQSLPSIHEALGSEQPLPYPSTVPPPSALVSAPQHYPPPTTTASPADQRPRHFASDLHASQGPSNPFSHPRSPFLGSGASQAPPPPPAAQPQNDALPRPPFSDSRPPYPTPQQNPKLPTLHPLKTAQSPTPSTTRPNISYPSYPPPAAHYESAAPPPPSSMNHHHPYSQYPPNYAHSATSASAPNSAYPPSASTYSAPPRYPPPAWRDNHADMTHMEEKKINRSSLAPYGESVKRHLESFDLEASLNEMADGSGHIAEFSKAYRQRAHENQRIGMTPQSMPRLEEVDEMLKQSERIQMSLQRM…	523	57.1244	8.961	42.89	-1.059	0(N)	Nucleus	1	PF00320	GATA zinc finger	CHSCNRAETPEWRRGPDGARTLCNACGLHYAKL	464	496	2e-10	1	CHSCNRAETPEWRRGPDGARTLCNAC	Type IVb
310	EnsemblFungi	Ascomycota	Dothideomycetes	Pleosporales	Lophiostoma macrostomum CBS 122681	Lmac1	KAF2654881	ASKPSNGHSMTYATAAPATAGGQGNSPPVCQNCTTSTTPLWRRDESGSVLCNACGLFLKLHGRPRPISLKTDVIKSRNRVKAGGPGGRKKAGENNSLPAAHPDADPNTGLAQHRRASGKISSGFSDRSQSPISRTGTPNFAHPANIAPQHMFDGVLHGADAFHSPSLPSLHLRQPSPGSTSSINGSHLEPPLSYDALANQNNSLRTRVNELELVNNLFRDRVTELETSEQEARRVEQTTRETEALLRAELEETRHREADLKRRLDEIEGEGPRHKKMRLSDLVDESRAGSPVNPMAAE	298	32.2294	8.967	64.6	-0.807	0(N)	Nucleus	2	PF00320;PF25026	GATA zinc finger;Asd-4-like domain	CQNCTTSTTPLWRRDESGSVLCNACGLFLKLHGR;SYDALANQNNSLRTRVNELELVNNLFRDRVTELETSEQEARRVEQTTRETEALLRAELEETRHREADLKRRLDEIEGE	30;193	63;270	8.6e-12;2.1e-23	1	CQNCTTSTTPLWRRDESGSVLCNAC	Type IVa
311	EnsemblFungi	Ascomycota	Dothideomycetes	Pleosporales	Lophiostoma macrostomum CBS 122681	Lmac2	KAF2655609	MATRTASGGTSLAPTPTHPHQLSRQPSKEDIEMAENLSLLTQPQDHHTAKAGSVPQEQQPVSAARNSRSEIYHSLEDAVPLRHSEQPEQAPTPASTVSSAQRGGLGSNAPITGQVCSNCGTTQTPLWRRSPTGETICNACGLYLKARNQSRPTNLKRNVQPQPVVNVQPSPGPGQSHDRDPSPVNVSGSPKGGTYVAAEQVSAGTCPGGGRCNGTGGQQGCNGCPAYNNRVSKTAQFALAQANATPASGDAAGSAEGSSQNTTTGGTSLIPACQNCGTTITPLWRRDEAGHTICNACGLYYKLHGAHRPVTMKKQEIKRRKRVVPAGPDNSHQTAPSTTSYSPQPRATHTPAFDQSSVSPEPTTAIESSEKDVDAPEPRGPVAIDFTNYYGTNSTSQLQ…	518	54.968	8.229	56.78	-0.81	0(N)	Nucleus	2	PF00320;PF00320	GATA zinc finger;GATA zinc finger	CSNCGTTQTPLWRRSPTGETICNACGLYLKARN;CQNCGTTITPLWRRDEAGHTICNACGLYYKLHG	116;273	148;305	4.7e-11;6.6e-12	2	CSNCGTTQTPLWRRSPTGETICNAC;CQNCGTTITPLWRRDEAGHTICNAC	Type IVa;Type IVa
312	EnsemblFungi	Ascomycota	Dothideomycetes	Pleosporales	Lophiostoma macrostomum CBS 122681	Lmac3	KAF2656924	MTGAGPGAGPLPTGFGAPSQNTTGSTLTEFTKRRNWSQRVLEELRDFLHILTSDGRILYVSPSCKALTGWEPAQLINHWIGEFIHPDDQGIFVKEFNESIASGNPLRFFYRFRKADDSWIIFESHGHPHLSSDNSGFVPPTGNVCRGFFMMARPYPTKNAALLDSFLEHKIENERLMKRIAELKREEQEEQDVPEGSWSKPRDGYSSVAPSESQAQTGSDSQASAAYNAMPPPAKPGVSNTALTRQNLDEALAASKPDSINDKMARYEGATHLETIEMLTGLRYRDGERSKGISTGDASPLLIRGDAGIQISLDRDGRTSSDKKKKLKIADEYVCTDCGTLDSPEWRKGPNGPKTLCNACGLRWAKKEKKKQSQSQGHSGSSHPAPLLMHTSTNSS	396	43.5682	7.17	62.42	-0.708	0(N)	Nucleus	2	PF08447;PF00320	PAS fold;GATA zinc finger	ILYVSPSCKALTGWEPAQLINHWIGEFIHPDDQGIFVKEFNESIASGNPLRFFYRFRKADDSWIIFESHGHPHLSSD;CTDCGTLDSPEWRKGPNGPKTLCNACGLRWAKKEKK	57;335	133;370	4.1e-11;1.2e-11	1	CTDCGTLDSPEWRKGPNGPKTLCNAC	Type IVb
313	EnsemblFungi	Ascomycota	Dothideomycetes	Pleosporales	Lophiostoma macrostomum CBS 122681	Lmac4	KAF2658080	MNGYPPYPPRPFAPVDDATGMLDMSPGALGFGMPDGQSLDDMVAQNDKANRRRSMPVYRQNQMPPDGQQDPRRLSMLNFGDGSNGTLDDFQFGLATDGSMDGMMRSATFPQGQPAQELQNERTGPSDLAINTQFANATSPFPAMQVSGSAYASPMHPSMSLDMDMASPYPNPMSISLEMNDPALSMMGADMNMFNGTQFASPLMGSPIAQDFVSPMPAPPPPPPEPPMTTMQPPDQFPSRSVSATSDVRPGISTRAGSQEQSTTRSNSRAQSEQQQPTPTSVQNQISPPSYPQQDQKPITQNNQQNNHDVPTDAFSRLKFPWTTPEGRNLHHLQSTSDVPTGGFPSTMHSNPHMNTSFKNAYSSTGFDMLGVLMRVATRPDPQIDIGSVDLSCAFVVCE…	1076	118.691	7.349	57.95	-0.682	0(N)	Nucleus	3	PF13426;PF08447;PF00320	PAS domain;PAS fold;GATA zinc finger	FVVCEANLDDMPIVYCSENFERLTGYSKHMILGRNCRFLQAPTGNVEPGLKRTYCDDESVLYMKKMLTERREAQISLINYRRGGQPFMNLLTMIPIAWEPGGETKFFVGFQVDL;LYLSPSSNRVLEYDPSELVGTSISSVCHPSDIVPVTRELKEMGNGASVNVVFRIRRKESGYMWFEGHGSLHTEQGK;CANCHTRTTPEWRRGPSGNRDLCNSCGLRWAKQN	395;600;952	508;675;985	7.1e-13;4.1e-07;4.6e-11	1	CANCHTRTTPEWRRGPSGNRDLCNSC	Type IVb
314	EnsemblFungi	Ascomycota	Dothideomycetes	Pleosporales	Lophiostoma macrostomum CBS 122681	Lmac5	KAF2658449	MGRGGAFALDAPAAGAHADRQAFATSSSPRHVRWSQTVPFENSSGDNSAVQSLTSNSTLDSNLELSFDEEAARKGMLEKPFFPTFKNDAGDANLDNPEEMQKNDPLATQIWRLYSKAKTSLPNAERMENLTWRMMAMNMRRAELDRNKGVGSPNTMKPPPAVGGGSSTAAPKSAPSGIAQLRKSIDQQQIPAVAADSMNLDDFIFPSSVGSPAGLPPSPSNEMRPASNATAPAIPIRKPNQSHDPDLSIARASAPSVPPTITREDEFGYVQRHVRKTSIDERRPPKRRAEASPQVPPVNSIMIPTDPEAEAALNHYSLDQTMQPPTFATSQPQVPFAIDTFQLQEDPIISSAGPFQQNFGFSPVGSPLMSHAPSYSNMYNPNSIASSLNSTDYYSPPSS…	910	96.9823	8.188	50.82	-0.72	0(N)	Nucleus	2	PF08550;PF00320	Nitrogen regulatory protein areA, GATA-like domain;GATA zinc finger	IWRLYSKAKTSLPNAERMENLTWRMMAM;CTNCFTQTTPLWRRNPEGHPLCNACGLFLKLHGV	110;684	137;717	2.7e-09;7.1e-13	1	CTNCFTQTTPLWRRNPEGHPLCNAC	Type IVa
315	EnsemblFungi	Ascomycota	Dothideomycetes	Pleosporales	Lophiostoma macrostomum CBS 122681	Lmac6	KAF2659839	METLEAPRTQSVVGLPPINHMDAEKIKREEVEYQRKHSAPAMVSPLHAYPGPPHSYSNHQSTLASALPGPHGGLLSPPESRRTSGDEKEQRQPTRQSLPSIHEALGSEQPLSYPAPPSAPVSGPPPFPPPSSAPSPSEQRTRTFSVDHINSQGPPNPFSHPRSPFMSTSTSLAPPPPPPQAPSDSLQRSSFSSTHHNPKLPTLHPLRTTQSPTIAPSRPPYSSYPQQPGSTYEASAPSSAGSMNPQYGYSQYSATPHPLSAPPLPPGAPNSGYPQSAAIQSAPPMRYPPPSWRSENSDLARLEEKKLGRPTNLAPYGESVKRHLESFDLEASLNEMSEGAGVIADFSRVYGQRAHENQRIGLTPHSIPRLEEVDKMLEQSEKIRMSLHRMREVVYNHQQ…	1169	130.606	6.67	66.79	-0.705	0(N)	Cytoplasm	2	PF00320;PF03074	GATA zinc finger;Glutamate-cysteine ligase	CHSCNRAETPEWRRGPDGARTLCNACGLHYAKL;IYMDAMAFGMGSCCLQITFQAKNIEEGRKMYDQLSPLGPILLALTAATPIYKGFLADTDVRWNQISRAVDDRTPEELGEKPLKNDRWRLPKSRYASNSTYISQDPRLRPEYLDPDLVVDNDIKKRLVEGGMDNLLATHFAHLFIRDPIVVFAEDLKELDLAKADHFENLQSTNWQHMRFKPPPPGSDTGWRVEFRPMEIQITDFENAAFSIFIVLITRAILSYDLNFYIPIARVSENMETAHKRDALSTQKFWFRKDPFSSRPSRSTNGTGTTTPTSNSRPPTPLGNVEDEYEAMSINEVINGQADGGFPGLIPLVESYLDSMNVDVETRCDLAQYLDLIRKRADGRLWTAAKWIREFVRGHERY…	453;767	485;1152	5.1e-10;1e-172	1	CHSCNRAETPEWRRGPDGARTLCNAC	Type IVb
316	EnsemblFungi	Ascomycota	Dothideomycetes	Pleosporales	Lophiotrema nucula str. CBS 627.86	Lnuc1	KAF2112072	MWGCCVDASLIYWACREALAPESSRQRSARPRDLPAPLTERCSECNSPGLAVFQTENQRFPSCAWRDPRCAFRRLCAPVNAIDLNHCALSLVSPLPRAHSTAAAIAIAIHGPACLPDPTMYQNGGSLPAEALARLNSMGPIELPLQQSGMMPTFDMDAMPMDVDLSQMDEDVATPTTQGFSASFVAPPSLQPTLSGSNDGYSLAQEVAMTGAGAGPLPASFGAPSMNPSGSTLTEFTKRRNWSQRVLEELRDLLHILTPDGRILYVSPSCKTLTGFEPGQLIGRFIGEFIHPDDSGIFVKEFNESIASGNQLRFFYRFRKADDTWLIFESQGHPHLSNDGGAFAPPSSMNCRGFFMMARPYPTKNAALLDSFLEHKIENERLTKRIAELKREEQEENDN…	602	65.7904	6.115	65.6	-0.525	0(N)	Nucleus	2	PF08447;PF00320	PAS fold;GATA zinc finger	ILYVSPSCKTLTGFEPGQLIGRFIGEFIHPDDSGIFVKEFNESIASGNQLRFFYRFRKADDTWLIFESQGHPHLSNDG;CTDCGTLDSPEWRKGPNGPKTLCNACGLRWAKKEKK	263;545	340;580	5.3e-10;2e-11	1	CTDCGTLDSPEWRKGPNGPKTLCNAC	Type IVb
317	EnsemblFungi	Ascomycota	Dothideomycetes	Pleosporales	Lophiotrema nucula str. CBS 627.86	Lnuc2	KAF2116550	MSGAAWGQGALFDAPAIGASADRPTSSSPRDARHPPAAPFDSSGNTSAVQSYSSNSTLDGKLDLSPQDSAARKGLLKQTVFPAFENDADVASPEEMQKNDPLATQIWKLYSKAKTQLPNAERMENLTWRMMAMNMRRAEMERNSGLTPNGEMRPPPLKSESAATTPKSAPSGIAQLRKSVDSQAQIQLPESMNLDDFIIPSSVGSPAGLSPSPSNEMRPPSNATAPAIPIRKPNQSHDLNSHLARASAPSVPPPVVREHDFGYVQRHVRKTSIDERRPPKRRADCSPQVPAVNSIMIPSDPEAEAALNQYSLDQQMQPPTFSHAPQPQVPFAIDTFQLHEDPIISSAGPFQQNFGFSPVGSPLMSQTPSYSNMYNPNSMASSLNSTDYYSPPSSAFPSA…	908	96.1345	8.729	52.1	-0.677	0(N)	Nucleus	2	PF08550;PF00320	Nitrogen regulatory protein areA, GATA-like domain;GATA zinc finger	IWKLYSKAKTQLPNAERMENLTWRMMAM;CTNCFTQTTPLWRRNPEGHPLCNACGLFLKLHGV	106;677	133;710	1e-09;7e-13	1	CTNCFTQTTPLWRRNPEGHPLCNAC	Type IVa
318	EnsemblFungi	Ascomycota	Dothideomycetes	Pleosporales	Lophiotrema nucula str. CBS 627.86	Lnuc3	KAF2116697	MEPVQPSPYTQSATSLIQDWQATALVEPESKDSGIIARLAHGCIDFLALLLQALSQSRTIPRKSENALRRSHATLKLWAEGHGVSEGRLDDILDRSRSLKFTTLTALNALCKVLIARLSKVVFAHSEAARLLTLRTTNTQVLYEQTRWLLSGNDENSSDSETDSSSDEEEYDEVDAIVNDLKTYVQCLVDLSNSLECPAMDPDHEDDEASLPRLQIRAAHDFYADIITRKYPQANIEVVEHLGKANWERYQRLQAERRLNVARGDTEEYASRSILADSEFKDSGLGTSVPAQSSYAQSVISILSTVSSGAQLQIPPLPASAKSGLPFECLACGKNVKVQTNREWRRHLFKDLQPYSCFQPSCNFSIAPFRERQLWIAHLELQHGFGPSWNNTQCSLCFE…	793	88.4087	5.257	77.68	-0.58	0(N)	Cytoplasm|Nucleus	1	PF00320	GATA zinc finger	CHSCNRADTPEWRRGPDGPKTLCNACGLHYAKML	754	787	6.4e-11	1	CHSCNRADTPEWRRGPDGPKTLCNAC	Type IVb
319	EnsemblFungi	Ascomycota	Dothideomycetes	Pleosporales	Lophiotrema nucula str. CBS 627.86	Lnuc4	KAF2121135	MAENLSLLNTSQGRTSPRVEQDPSGQQAASSPQNRDPEIYHSLEDTLHYQREQPEHVPSPPTTTSLHPTDLGGGNAPVAGQTCSNCGTTRTPLWRRSPTGETICNACGLYLKARNQSRPTNLKRNVPPQPILQVQQSPAPGQSHDRSTSPANVAGSPRGATYVSANQSVTGTCPGGGRCNGTGGQQGCNGCPAFNNRVSKTAQFALAQASSTGAPPDPTTSGDASSTVGGGTSVILACQNCGTTVTPLWRRDEAGHTICNACGLYYKLHGTHRPVEMKKQEIKRRKRVVPAAHDSTTIAPSSIASYSPPQRATETPIFEHTPSPDPTSAIETTERLSEEPRGPIAVDFTDYYKSTLGRPSIVQPSAPSPRKRSLSATMDREESTPSSIPNAVQPTPARS…	478	50.9046	8.565	56	-0.809	0(N)	Nucleus	2	PF00320;PF00320	GATA zinc finger;GATA zinc finger	CSNCGTTRTPLWRRSPTGETICNACGLYLKARN;CQNCGTTVTPLWRRDEAGHTICNACGLYYKLHGT	83;238	115;271	1.6e-10;3.4e-12	2	CSNCGTTRTPLWRRSPTGETICNAC;CQNCGTTVTPLWRRDEAGHTICNAC	Type IVa;Type IVa
320	EnsemblFungi	Ascomycota	Dothideomycetes	Pleosporales	Lophiotrema nucula str. CBS 627.86	Lnuc5	KAF2121924	MNGYGNFQQPQRRYLPHNNASSIMDMSGDGLNAFGLGDGQSLDDIVSQNEKVNRRRSMPVYAGGPMQMGSPDSRRLSMMNFGDIGDANYGDFQFSMPADPSMDGMMRSNTFPRASTNAQLDGMPAADLSVNTQYSNQNTPFSNLADPGSAYASPLPGGNTLDMDMNLASPYPPNASSMPFDMHDPSLNALGTDMNIFPANQFATPLMDSPVAQDFSGPMPQPPQDNTISGLPLGDQFGNNSVSTKSELPSGELSRTDSHGQSSQRSTSRQQSEPQLAQGISHGPAAAFTGEPVAIPPTQDPSMGSESFNQSDSFGPLKFPWTTPSEGFPSSRNNNTHMKTEFKNAYSSTGFDMLGVLMRVATRRNPDIDIGSVDLSCAFVVCDAQEHDCPIVYCSENFE…	1101	120.663	8.055	62.72	-0.601	0(N)	Nucleus	3	PF13426;PF08447;PF00320	PAS domain;PAS fold;GATA zinc finger	FVVCDAQEHDCPIVYCSENFERLTGYTKHMILGRNCRFLQSPDGKVEPGIKRKYVDDDSVLYLKNMINGRKEAQISLINYRRGGQPFMNLLTMIPIAWEPGQAIKFIVGFQVDL;LYLSPSSKKVLEYEASELVGTALSSVCHPSDIVPVTRELKESGNGASVNVVFRIRRKKSGYMWFEGHGSLHTEQGK;CVNCHTRTTPEWRRGPSGNRDLCNSCGLRWAKQ	379;585;936	492;660;968	1.2e-12;3e-06;2.2e-11	1	CVNCHTRTTPEWRRGPSGNRDLCNSC	Type IVb
321	EnsemblFungi	Ascomycota	Dothideomycetes	Pleosporales	Lophiotrema nucula str. CBS 627.86	Lnuc6	KAF2122382	MTYATSAPATAGGTVNSPPSCQNCATSTTPLWRRDESGSVLCNACGLFLKLHGRPRPISLKTDVIKSRNRVKTGGPGGRKKIDGVNGLAAAHPDADPAMAALAQQRRASGKISSGLSDRSQSPISRTGTPGLSHPSNIAPQHMFDGVLHSEAFHSSSIPSFIRQPSPSSVSSVNGSHLEPPLSYDALAAQNTSLRTRVNELEVINNLFRERVTELENSEQVARGAEAQLRAELGEARQREADLKRRLDEVEDEGPRHKKMRLSDIVDEDRAGSPISSMVD	280	30.0472	8.733	72.54	-0.592	0(N)	Nucleus	2	PF00320;PF25026	GATA zinc finger;Asd-4-like domain	CQNCATSTTPLWRRDESGSVLCNACGLFLKLHGR;SYDALAAQNTSLRTRVNELEVINNLFRERVTELENSEQVARGAEAQLRAELGEARQREADLKRRLDEVEDE	21;183	54;253	4.2e-12;6.6e-21	1	CQNCATSTTPLWRRDESGSVLCNAC	Type IVa
322	EnsemblFungi	Ascomycota	Dothideomycetes	Pleosporales	Massarina eburnea CBS 473.64	Mebu1	KAF2637364	MYPASSAASMDDVMQMDLQQLDAADSFTQQMQQNPNVLSGPAPSDLVALPQGAPALAGVAGVAGVAGAGPLPTGFGAPSLNPSGSTLTEFTKRRNWSQRVLEELRDFLHILTPGGRIMYASPSCKALTGWDPGQLVGRFVGEFIHPDDSGIFVKEFNESIASGNPLRFFYRFLKNDETWAIFEAHGHPHLSNDTSTFAPQTTMRCRGFFMMSRPYPTKNAALLDSFLEHKIENERLMKRIAELKREEQEEGDSMTGAWTKKTDVTGSVTAPSVSDTRGRPESEGVSASALAAYNAMPPPAKPGIPNTALTRQNLDEALAASKPDSINDKMARYEGATHLETIEMLTGLRYRDGERSQGISTGEHSPMLIRGDAGIPVSLDRDGRSGADKKKKLKIADEY…	458	49.7635	6.392	64.65	-0.544	0(N)	Nucleus	2	PF08447;PF00320	PAS fold;GATA zinc finger	IMYASPSCKALTGWDPGQLVGRFVGEFIHPDDSGIFVKEFNESIASGNPLRFFYRFLKNDETWAIFEAHGHPHLS;CTDCGTLDSPEWRKGPNGPKTLCNACGLRWAKKEKK	117;401	191;436	2.4e-08;1.4e-11	1	CTDCGTLDSPEWRKGPNGPKTLCNAC	Type IVb
323	EnsemblFungi	Ascomycota	Dothideomycetes	Pleosporales	Massarina eburnea CBS 473.64	Mebu2	KAF2639149	MPVRWITVPSEDDVEAPFTRQTPVSAVTLFGVLANSSIFPALKNDAGGPNMASPERLQQSDPLATQVWKLYSKAKSQLPNSERMSNLTWRMMAMNMRRDRNKMQEELNPPPSMAAHTRPALKSAPSGIAQLRKSIDQQRQAQEDAPAPSSPSDAMNLDDFILPSSVGSPAGLSPSPSNEMGPPTNATAPAIPIRKANQSLDHNLSLARASAPSVPPVVSRENEFGYVQRHVRKTSIDERRPPKRRAEASPQLPPVNSTMMPSNPEDDVALHHYSLDHSMHPPNFNAHHPQVPFSIDTFQLQDDPIINSAGPFQQNFGFSPVGSPLINQNSSYSNLYNPNSMASSLNSTDYYSPPSSAFPSSASTPQPINEEGANMYFDRNGMDIRNTHSSHGFGPRQPS…	845	90.1739	8.829	51.69	-0.722	0(N)	Nucleus	2	PF08550;PF00320	Nitrogen regulatory protein areA, GATA-like domain;GATA zinc finger	VWKLYSKAKSQLPNSERMSNLTWRMMAM;CTNCFTQTTPLWRRNPEGHPLCNACGLFLKLHGV	67;627	94;660	1.3e-08;6.5e-13	1	CTNCFTQTTPLWRRNPEGHPLCNAC	Type IVa
324	EnsemblFungi	Ascomycota	Dothideomycetes	Pleosporales	Massarina eburnea CBS 473.64	Mebu3	KAF2639716	MTYATAAPATAGGQPNSPPVCQNCTTSTTPLWRRDESGSVLCNACGLFLKLHGRPRPISLKTDVIKSRNRVKTGAPGARKKPEANGLPAAHPDADGSLGFAQQRRASGKISSGLSDRSQSPISRTGTPAYGHPSNIAPQHMFDGVLHADAFHSPQMPNFALRQPSPAPSSVNGSHLEPPLAYDTLAAQNTALKTRVSELELVNDLFRGRVTELEGSEKAARSMEAQLRAELGEVKRREADLKRRLDDFEGEGQQHKKMRMSDLVDESRAGSPISSLTTE	279	30.0113	9.249	65.52	-0.657	0(N)	Nucleus	2	PF00320;PF25026	GATA zinc finger;Asd-4-like domain	CQNCTTSTTPLWRRDESGSVLCNACGLFLKLHGR;YDTLAAQNTALKTRVSELELVNDLFRGRVTELEGSEKAARSMEAQLRAELGEVKRREADLKRRLDDFEGE	21;182	54;251	7.9e-12;6.3e-23	1	CQNCTTSTTPLWRRDESGSVLCNAC	Type IVa
325	EnsemblFungi	Ascomycota	Dothideomycetes	Pleosporales	Massarina eburnea CBS 473.64	Mebu4	KAF2641373	MNGYPYPPRPFANGGTMPMDMPGSGINVNAFDMNEGQSLDDIVSANEKDRRRMSMPVYRGTSTINFADAGSPDSRRFSTITFGDPNNGMEDFNFEMPTSAGIDGIDGIDGIMRSGTFPQTSSDMQNAQTPASDLAINTQFSTTNSPFSTMAQPVSSYASPMHANLDMDMTSPYPAMSLPMDMNDSLGMMPADMNLFPGAQFTAPMLDTPNAQEFPPATPNASLQAPPDPYRSESSSATPDVRPHVPTRNNSNDQTSMRSNSRPTSEEHPSSKPTPSQMSQQSLKSQEPIALPTGHAVNPDAFNPITFPWRTPSGGFPSTMRSNPHMNTQYKDAYSSTGFDMLGVLMRVAARRNPQIDIGSVDLSCAFVVCDSDSDDIPIVYCSENFERLTGYNKHMILG…	960	105.947	6.698	62.67	-0.61	0(N)	Nucleus	3	PF13426;PF08447;PF00320	PAS domain;PAS fold;GATA zinc finger	CAFVVCDSDSDDIPIVYCSENFERLTGYNKHMILGRNCRFLQSPDGKVEPGVKRNYVDDDSVYYLKKTIEAKQEAQISLINYRRGGQPFMNLLTTIPIPLEDGGPIKFIVGFQVDL;LYLSPSSNRILEYDPSELVGTALSSVCHPSDIVPVTRELKDMNNGASVNVVFRIRRKNSGYMWFEGHGSLHTEQGK;CANCHTRTTPEWRRGPSGNRDLCNSCGLRWAKQ	365;573;923	480;648;955	1.5e-11;2.7e-08;2.6e-11	1	CANCHTRTTPEWRRGPSGNRDLCNSC	Type IVb
326	EnsemblFungi	Ascomycota	Dothideomycetes	Pleosporales	Massarina eburnea CBS 473.64	Mebu5	KAF2643807	MEALDARQSSSFGLPSISNLDSVKREEMERKRSYPFPAPNLSVPASAAAGPLGGLLSPPESRRTSGDDEKEQQRPRQSLPSIHELAFAPTAPPPPAPASASQPHFQPPTTSPVDHRTRPSFPSDLHGSQGPGNPFSHPRSPYTSASTVPPPPPPQAQPDSLPRPPYAEPRPSFSDPRPSLSERHSFPAPQHNPKLPTLHPLQTTQSPPPGPSRPNPPYSSYSAHPSAHPSGAYETQAPHSAGPMNHSYGYSQYPSSNYPLSAPAPGAPNSAYPPSTYSAPPRPYPNPPSWPEHRLEEKKINRSSLAPYGESVKRHLESFDLEASLNEMADGAVHITEFSDHYRRQAHSTQRIGMGAQSVPGLDEVDRMLKHSEKIQISLQRMREVIFNNQQASMVEAPQ…	507	55.0753	9.188	43.83	-1.013	0(N)	Nucleus	1	PF00320	GATA zinc finger	CHSCNRAETPEWRRGPDGARTLCNACGLHYAKL	448	480	1.9e-10	1	CHSCNRAETPEWRRGPDGARTLCNAC	Type IVb
327	EnsemblFungi	Ascomycota	Dothideomycetes	Pleosporales	Massarina eburnea CBS 473.64	Mebu6	KAF2645513	MAGSEESGGTSLAPTPTYPHHLSQEPSQEDVEMAEHLAQLQQAEDPRTPIYHSLEDTKPLRESEQPEQSLSPATPASLPPPSISGGNAPVTGQVCSNCGTTRTPLWRRSPTGETICNACGLYLKARNQQRPTNLKRNTPSKPIVPVQQSPAPGQCHDRSTSPGNAASSPRVSTYVTADHGATGTCPGGGRCNGMGGQQGCNGCPAYNNRVFKTAQVALAQANAYSSPSDAAANERNSQSTVTNVIQACQNCGTTVTPLWRRDEAGHTICNACGLYHKLHGTHRPVEMKKQEIKRRKRIVPADGAGGSTQAPSLASYSPQQRATQTPAFEHSVSPDPASTIESSEIYPVGARIPVPVDFTNYNSTSHPSSNLGGPPTPSTTYISAPSPRKRSLSATLDPD…	482	51.3542	8.195	56.58	-0.78	0(N)	Nucleus	2	PF00320;PF00320	GATA zinc finger;GATA zinc finger	CSNCGTTRTPLWRRSPTGETICNACGLYLKARN;CQNCGTTVTPLWRRDEAGHTICNACGLYHKLHGT	95;248	127;281	1.7e-10;2.4e-11	2	CSNCGTTRTPLWRRSPTGETICNAC;CQNCGTTVTPLWRRDEAGHTICNAC	Type IVa;Type IVa
328	EnsemblFungi	Ascomycota	Dothideomycetes	Pleosporales	Ophiobolus disseminans str. CBS 113818	Odis1	KAF2818885	MRMPSPPSKPSNGLSMTYATSAPATSGGQPGSPPVCGNCSTSTTPLWRRDETGAVLCNACGLFLKLHGRPRPISLKTDVIKSRNRVKTGAPGARKRTGEMNGLPAAHPDADGSLALAQQRRASGKISSGLSDRSQSPVSRTGTPNFLHPSNIAPEHMFQQALNGEVYHSSSLSGFGHRAPSPANSSINGLEAPLPYESLAAQNTALKTRVSEMELINDLFRNRVSELENSENAARETEAKLRAELEDVKRRESDLKRRLDEIEDESPRHKKPRFSDLSDLVDETRAGSPINAMAE	295	31.8453	9.094	65.59	-0.718	0(N)	Nucleus	2	PF00320;PF25026	GATA zinc finger;Asd-4-like domain	CGNCSTSTTPLWRRDETGAVLCNACGLFLKLHGR;YESLAAQNTALKTRVSEMELINDLFRNRVSELENSENAARETEAKLRAELEDVKRRESDLKRRLDEIEDE	36;196	69;265	3.5e-11;2.1e-22	1	CGNCSTSTTPLWRRDETGAVLCNAC	Type IVa
329	EnsemblFungi	Ascomycota	Dothideomycetes	Pleosporales	Ophiobolus disseminans str. CBS 113818	Odis2	KAF2820209	MAPNNGIAGLPTQQQNQVDYTGLPMMGGMDLDMDMSLEGAFSHAQGQPNIAASSTTSEAGGYSVAQDMTMTGAGAGPLPTGFGAPSMNPSGSTLTEFTKRRNWSQRVLEELRDLLHILTPDGRILYVSPSCKTLTGWDPSQLMGRFINEFIHPDDIGIFVKEFNESIASGNPLRFFYRFHKIDDTWAIFESHGHPHLSSDPSSFAPPNALNCRGFFLMARPYPTKNAALLDSFLEHKIENERLTKRIAELKREEQDENDEWTRKTEGASTVLSETQPTQSTAQSEAAAASYAQMPPPAKPVLSNTALTRQNLDEALAATKQDSINDKMARYEGANHLETIEMLTGLRYRDGERSQGISTGDASPNLIRGDAGIQISLDRDGRSSSDKKKKLKIADEYVC…	462	50.4469	5.883	63.27	-0.616	0(N)	Nucleus	2	PF08447;PF00320	PAS fold;GATA zinc finger	ILYVSPSCKTLTGWDPSQLMGRFINEFIHPDDIGIFVKEFNESIASGNPLRFFYRFHKIDDTWAIFESHGHPHLS;CTDCGTLDSPEWRKGPSGPKTLCNACGLRWAKKEKK	124;399	198;434	2.6e-08;2.2e-11	1	CTDCGTLDSPEWRKGPSGPKTLCNAC	Type IVb
330	EnsemblFungi	Ascomycota	Dothideomycetes	Pleosporales	Ophiobolus disseminans str. CBS 113818	Odis3	KAF2822225	MATSLHPMAGPSHYHSNHQSSPASAVPASLGGLLSPPESRRTSGDEKESQRPTARQSLPSIHEALGSEQPLSYPPPVQPPSALTSAPQHYHPSSAVTSPSDQRHRPFPPDVHGSQGPTNPFSHPRSPFMGTSATNVPPPPPPQSHSDSLPRPSFQSPRPPYSTPHHNPKLPTLHPLKTTQSPPTSAARPNAPYSYPPPSTNFEASAPPPVASMSHYSYPQYPSNYPLSAPPQSAPNSAYPSAATTYSAPPRYPPPSSWRDGSEMARMEEKKINRSSLAPYGESVKRHLESFDLEASLNEMADGSGRISEFSKIYRQRAHENQRIGMTPQSMPRLEEVDDMLKQSERINMSLQRMRDVVFSHHQASIVEPPQDPRYRQMNGYDHDSSSNYGDDAKGGGFA…	1133	126.483	7.288	62.38	-0.726	0(N)	Cytoplasm	2	PF00320;PF03074	GATA zinc finger;Glutamate-cysteine ligase	CHSCNRAETPEWRRGPDGARTLCNACGLHYAKL;IHMDAMAFGMGSCCLQITFQAKNIEEGRKMYDQLTPLGPILLALTAATPIYKGFLADTDVRWNQISRAVDDRTPEELGEKPLKKDRWRLPKSRYASNSTYISQDSRLRPEYLDPDLIVDEDLKKRLVEGGMDDLLATHFAHLFIRDPIVVFNEDLKDLDLTKADHFENLQSTNWQHMRFKPPPPGSDIGWRVEFRPMEIQITDFENAAFSIFIVLITRAILSFNLNFYMPITRVSENMETAHIRDAVSTQKFWFRKNPFSSHKSSSGTGTSTPAETHSRPPTPNGPVKDEYEQMSINEVINGQQATDGGFPGLIPLVESYLNSMNVDVETRCDVATYLDLIRKRANGTYWTAAKWIRHFVATHSE…	417;729	449;1115	4.9e-10;3.1e-174	1	CHSCNRAETPEWRRGPDGARTLCNAC	Type IVb
331	EnsemblFungi	Ascomycota	Dothideomycetes	Pleosporales	Ophiobolus disseminans str. CBS 113818	Odis4	KAF2825694	CTNCFTQTTPFWRRNVEGHPLCNACGLFLKLHGVVRPLSLKTDVIKKRNR	50	5.76976	10.102	79.8	-0.318	0(N)	Cytoplasm|Nucleus	1	PF00320	GATA zinc finger	CTNCFTQTTPFWRRNVEGHPLCNACGLFLKLHGV	1	34	1.2e-12	1	CTNCFTQTTPFWRRNVEGHPLCNAC	Type IVa
332	EnsemblFungi	Ascomycota	Dothideomycetes	Pleosporales	Ophiobolus disseminans str. CBS 113818	Odis5	KAF2827632	MNGNGYPYPMRSFPSNGPTMLNNMQNGMNGFDDMGQGQSLDQIVSQNDKADNIRRRSMPVYANQRGQQQLGMGSSESRRLSMLNFGDPSDADDFQFDMQSAGMGDMMRNTPGFPRTMAEMQSSSRHPATDLAINTQFQGQNSPFSTMAAPGSAYASPLHANASLDMNMSPYPNGMSMAMEMDNSLDMMPNDLNMFPNNQFNAPIMGSPINQDFVGPLPSTQDNSMPGLQQQDQFKRPSLSNTPEGRSATSLMPSRASSQDQSSMRSNSRPHSEQHSSSRSADGPTQMSLASLKKQQPIALDPGLNLPKDQMNQIEDFNLPWKPPAGGFPSTMHSNPHMKTQFKNAYSSTGFDMLGVLMRVAARPDPQVDIGSVDLSCAFVVCDAEMDDNPIVYCSENFE…	1061	117.436	8.716	58.57	-0.717	0(N)	Nucleus	3	PF13426;PF08447;PF00320	PAS domain;PAS fold;GATA zinc finger	FVVCDAEMDDNPIVYCSENFERLTGYTRHMILGRNCRFLQSPDGKVEAGVKRKYVDDDSVLYMKNMINTRAEAQISLINYRRGGQPFMNLLTMIPIAWEPNGPMKFFVGFQVDL;LYLSPSSNRILEYDPSELIGTALSSVCHPSDIVPVTRELKETTNGGSVNVVFRIRRKKSGYMWFEGHGSLHTEQGK;CANCHTRTTPEWRRGPSGNRDLCNSCGLRWAKQ	379;584;935	492;659;967	1.3e-12;3.3e-08;3.6e-11	1	CANCHTRTTPEWRRGPSGNRDLCNSC	Type IVb
333	EnsemblFungi	Ascomycota	Dothideomycetes	Pleosporales	Ophiobolus disseminans str. CBS 113818	Odis6	KAF2829318	MAHPSGSGGTSLAPTPTHPHHLSRETSKDELEMAESLRRLNQAHDSHTSRTATPSHAQRPVPSHDDDRSEIYHSLEDAVPIPGGPGTPATPSSLPVHLSNPMGAGAPLSGQVCSNCKTTQTPLWRRSPTGETVCNACGLYLKARNQHRPVNLKRNTSTHSTVSVQQSPAPAQENINRTSPGNLAASPKVATYVAADQMAAGTCPGGGRCNGTGGQQGCSGCPAFNNRVSKTAKFALAQANAVSNTNPTNGASGSSATPGPANGSPSTSAIPACQNCGTTITPLWRRDDAGHIICNACGLYYKLHNTHRPVAMKKQEIKRRKRVAPAGDTGSQVAPSVADYSPPQRGLDTPAFEHSASPDPSVAIESREEYTPEPKGPLAIDFTHYYGGSAAVTSHPGNL…	511	54.1683	8.79	54.91	-0.797	0(N)	Nucleus	2	PF00320;PF00320	GATA zinc finger;GATA zinc finger	CSNCKTTQTPLWRRSPTGETVCNACGLYLKARN;CQNCGTTITPLWRRDDAGHIICNACGLYYKLHNT	113;273	145;306	9.2e-11;6.4e-12	2	CSNCKTTQTPLWRRSPTGETVCNAC;CQNCGTTITPLWRRDDAGHIICNAC	Type IVa;Type IVa
334	EnsemblFungi	Ascomycota	Dothideomycetes	Pleosporales	Ophiobolus disseminans str. CBS 113818	Odis7	KAF2830052	MDFAGPEGRMDISPTEESARRGVLQDAIFPQFGNDAGSPSVESPEQMQKTDPLGTQIWKLYSRAKTQLPNAERMENLTWRMMAMNMRRAELDRNKGYECRHVPRLASPLYRAALGSQQQSSDLMPPPAVSARPAPRTAPSGIAQQLRKSSEHQAQVPPPQPDTMNLDDFIFPSSVGSPAGLSPEPSNGTPGPFNATAPAIPIRKPHSANDHNLSLARASAPSVPPIVTRENEFSYVPRHVRKTSIDERRPPKRRAEASPQVPPVNSIMIPTDAQAEADLNQYSLDTTMHPPPFPASQPQVPFSLDTFQMHHEDPIINSAGPFQQNFGFSPVGSPMMNHSASYSNMFNPNSMASSLNSTDYYSPPSSAFPSAVSTPQPLPDDSQLYFDRTGMDIRGPHGG…	868	93.1043	8.652	49.32	-0.753	0(N)	Nucleus	2	PF08550;PF00320	Nitrogen regulatory protein areA, GATA-like domain;GATA zinc finger	IWKLYSRAKTQLPNAERMENLTWRMMAM;CTNCFTQTTPLWRRNPEGHPLCNACGLFLKLHGV	57;649	84;682	3.1e-09;6.7e-13	1	CTNCFTQTTPLWRRNPEGHPLCNAC	Type IVa
335	EnsemblFungi	Ascomycota	Dothideomycetes	Pleosporales	Paraphaeosphaeria sporulosa str. AP3s5-JAC2a	Pspo1	OAG02588	MNGYSYPQSRGPFAQQQSNANPIMDLSGDDLDAAFAMGSGQSLDDIVSSNDKANRRRSMPVYAGNQMNMNSPDSRRFSSMNFGGPGNSTMDDFQFDMSAAGMDAMLPTAAFPHTSGELQNDRVPAADLAINTQFSQANPNSPFPNVANGGSAYASPLQHNGSLDMDMSPYPGGMPMSLDVNDPMAMLPNDMTMFQNSAFGPSMMNSPVAQDFGGPPTSAPQDSNMGMASPANFRSESSNATSNVHSNMPTRTGSHADSRPRSNSRPNSHNPQIPSQNGSQMSKESLANQGPIQLDPEREVPQQRYEEASYAKNNFPWVTSTGGFPSTKDRNPHSKAQFKNAYSSTGFDMLGVLMRVATRQNPQINIGAVDLSCAFVVCDAEMDDIPIVYCSENFERLTG…	1060	116.227	8.429	59.63	-0.678	0(N)	Nucleus	3	PF13426;PF08447;PF00320	PAS domain;PAS fold;GATA zinc finger	AFVVCDAEMDDIPIVYCSENFERLTGYSKHMILGRNCRFLQSPDGKVEPGIKRQYVDDDSVLYLKNTISERAEAQISLINYRRGGQPFMNLLTMIPIPWEPGGSTKFFVGFQVDL;LYLSPSSNHVLEYDPSELVGTALSSVCHPSDIVPVTRELKETSNGASVNVVFRIRRKKSGYMWFEGHGSLHTEQGK;CANCHTRTTPEWRRGPSGNRDLCNSCGLRWAKQ	374;580;929	488;655;961	1.4e-11;5.5e-07;3.6e-11	1	CANCHTRTTPEWRRGPSGNRDLCNSC	Type IVb
336	EnsemblFungi	Ascomycota	Dothideomycetes	Pleosporales	Paraphaeosphaeria sporulosa str. AP3s5-JAC2a	Pspo2	OAG05937	MSVEDMMPMEMDLSQFDDGSSSTPQANYSPFGGQQLQQALNQDSSMTGAGAGPLPTGFGAPSLNPSGSTLTEFTKRRNWSQRVLEELRDLLHILTPDGRILYASPSSKALTGWEPQQLVGRFVGEFIHPDDSGIFVKEFNESIASGNPLRFFYRFRKTDETWAIFEAHGHPHLSNDPSTFAPPNTMNCRGFFMMARPYPTKNAALLDSFLEHKIENERLMKRIAELKREEQEETDAQEQHWQKKADGVSSVTPSETVGQTESVSASAIAAYQAMPPPAKPGVSNTALTRQNLDEALAASKPDSINDKMARYEGATHLETIEMLTGLRYRDGERSQGISTGEHSPMLIRGDAGIQISLDRDGRASSDKKKKLKIADEYVCTDCGTLDSPEWRKGPNGPKT…	439	48.3594	5.936	59.66	-0.715	0(N)	Nucleus	2	PF08447;PF00320	PAS fold;GATA zinc finger	ILYASPSSKALTGWEPQQLVGRFVGEFIHPDDSGIFVKEFNESIASGNPLRFFYRFRKTDETWAIFEAHGHPHL;CTDCGTLDSPEWRKGPNGPKTLCNACGLRWAKKEKK	100;379	173;414	8.5e-09;1.4e-11	1	CTDCGTLDSPEWRKGPNGPKTLCNAC	Type IVb
337	EnsemblFungi	Ascomycota	Dothideomycetes	Pleosporales	Paraphaeosphaeria sporulosa str. AP3s5-JAC2a	Pspo3	OAG05970	MSARTPPITVSPPQRLPGHSMTYATAAPATAGGNANSPPVCQNCTTSTTPLWRRDESGSVLCNACGLFLKLHGRPRPISLKTDVIKSRNRVKTGGPGARKKPGEMNGLPAAHPDADAFQGLAQHRRASGKISSGMSDRSHSPISRTGTPGFPHPSNIAPQHMFDGALHGDFHSPSLPNFGFRQPSPGAMSLSNGSHMEAPPPYDTLAAQNTALKTRVSELELVNDLFRGRVTELESSEQAARERESQIRTELEEAKQREADLKRRLDELEGEGAEGPRHKKMRLSDLVDESRAGSPISSLTE	302	32.516	9.133	60.53	-0.73	0(N)	Nucleus	2	PF00320;PF25026	GATA zinc finger;Asd-4-like domain	CQNCTTSTTPLWRRDESGSVLCNACGLFLKLHGR;PYDTLAAQNTALKTRVSELELVNDLFRGRVTELESSEQAARERESQIRTELEEAKQREADLKRRLDELEGE	41;202	74;272	8.8e-12;2.8e-24	1	CQNCTTSTTPLWRRDESGSVLCNAC	Type IVa
338	EnsemblFungi	Ascomycota	Dothideomycetes	Pleosporales	Paraphaeosphaeria sporulosa str. AP3s5-JAC2a	Pspo4	OAG07130	MSAAWSSLGSPLQPSPDHDAILEGSLPLSPRAAAARQGVLADPIFPALKNDAYSAHMESPEEMQRNDPLGTQIWKLYSKTRTQLPNAERMENLTWRMMAMSMRRAEHERNRGYECRHREQMRPAPMAAPPRPMLNTAPSGIAQQLRRSVDQQAHAPPPPDPNAMNLDDFIQPSSVGSPAGLPPSPSPSQDMRASAATPQTAIPIRKAHQHHEQDLSLAHASAPSVPPALHRDRDTEFGYVQRRVRKTSIDERRPPKRRAEASPQVPPVNSTMIPSNPDEEAALHHYSLDQSSLQPPSFSTPQPHVPFNIDTSNFHMSEDPIISSAGPFQQQFGFSPVGSPLMSQNASYSNLFNGTSMASSLNSTDYYSPPSSAFHSTVSTPQPLQDEGQMYFDRNGMDI…	879	94.3255	8.182	51.06	-0.744	0(N)	Nucleus	2	PF08550;PF00320	Nitrogen regulatory protein areA, GATA-like domain;GATA zinc finger	IWKLYSKTRTQLPNAERMENLTWRMMAM;CTNCFTQTTPLWRRNPEGHPLCNACGLFLKLHGV	73;657	100;690	3e-09;6.8e-13	1	CTNCFTQTTPLWRRNPEGHPLCNAC	Type IVa
339	EnsemblFungi	Ascomycota	Dothideomycetes	Pleosporales	Paraphaeosphaeria sporulosa str. AP3s5-JAC2a	Pspo5	OAG09557	MEALDSRHSIGLPSISNLDQVKREEMDYQRKHSASAAPMGSLHPLAHHGHQSSAASTLPGALGGLLSPPESRRTSGEDDAQRQPARHSLPSIQEALGGPEPPHAFPVSAPGPPPAPTSAPQSYFPPSTTSPTDQRTRAFSTDIHGNQGPSNPFAHTRSPFMGTSSTTGPPPPPPAAPLDSLPRPSFSEPRPSFSEPRPSYSAPQQNSKLPALHPIRTDRSPPPGPVRPSYSYNNYPPQSSATYEPAAPHSAGPMNPNYGYQQQYPSSYPLSAPAPGAPNAAYPPSATTYSAPPRPFAGQWDSRLEEKKLNPASLAPYGESVKRHLESFDLEASLNEMAEGAGRITDFSKIYRQRAHETQRIGMTPQSMPRLDEVDDMIKHSERVQISLQRMREVVFNHQ…	512	55.3797	9.094	45.7	-0.942	0(N)	Nucleus	1	PF00320	GATA zinc finger	CHSCNRAETPEWRRGPDGARTLCNACGLHYAKL	453	485	1.9e-10	1	CHSCNRAETPEWRRGPDGARTLCNAC	Type IVb
340	EnsemblFungi	Ascomycota	Dothideomycetes	Pleosporales	Paraphaeosphaeria sporulosa str. AP3s5-JAC2a	Pspo6	OAG09977	MANGSGSGGTSLAPTPTHPHHLSREPSREDVEMAEQLSQLNQVQDNRTSRITSPSQARQAPTPPPPHAPEIYHSLEDARPMRESEQPEQPSLPTTPASLPQPSLGAGNALISGQVCSNCGTTKTPLWRRSPAGETICNACGLYQKARNQSRPTNLKRNTTGQPILPIHQSPATGQGHDRSASPGGAGVSPRPATYVASDHQAAGTCPGGGRCNGMGGQQGCGGCPAFNNRVSKTAQFALAQTSGPSTTTGNDRGAPVATNAIPACQNCGTTVTPLWRRDEAGHTICNACGLYYKLHGAHRPVEMKKQEIKRRKRIVPADGNSTQAPSSVTSFSPQPRSMHTPAFEHSVSPDPSTAIESSELPSGIRAPVPVDFTTYQGSGAQLGPPSPRKRSLSATLDA…	481	51	8.714	55.51	-0.784	0(N)	Nucleus	2	PF00320;PF00320	GATA zinc finger;GATA zinc finger	CSNCGTTKTPLWRRSPAGETICNACGLYQKARN;CQNCGTTVTPLWRRDEAGHTICNACGLYYKLHG	116;265	148;297	1.4e-11;4.4e-12	2	CSNCGTTKTPLWRRSPAGETICNAC;CQNCGTTVTPLWRRDEAGHTICNAC	Type IVa;Type IVa
341	EnsemblFungi	Ascomycota	Dothideomycetes	Pleosporales	Phaeosphaeria nodorum	Pnod1	SNOT_07400	MDLSPSEDAARRGMLEDAMFPAFGNDASSPSVESPEQMQKNDPLGTQIWKLYSRAKTQLPNAERMENLTWRMMAMNMRRAELDRNKGNAPNSQSNGLMPPPSASARPPPRTAPSGIAQQLRKSSEQQAQVPQAHSHAQSQAHSDTMNLDDFIFPSSVGSPAGLSPEPSNDTPGPFHATAPAIPIRKPNQGSDQDISLARASAPSVPPLINRENEFAYVPRHVRKTSIDERRPPKRRAEASPLVPPVNSIMIPTDAQSEADLNQYSLDHPMHPPTFPASQASQAQVPFSIDTFQMHEDPIINSAGPFQQNFAFSPVGSPMMNNHNASYTNMFNPNSMASSLNSTDYYSPPSSAFPSAVSTPQPLPDDSQMYFDRTGMDIRGPHGGSSYGPHRPSNLSTSM…	854	91.4401	8.24	47.87	-0.78	0(N)	Nucleus	2	PF08550;PF00320	Nitrogen regulatory protein areA, GATA-like domain;GATA zinc finger	IWKLYSRAKTQLPNAERMENLTWRMMAM;CTNCFTQTTPLWRRNPEGHPLCNACGLFLKLHGV	48;634	75;667	3e-09;6.6e-13	1	CTNCFTQTTPLWRRNPEGHPLCNAC	Type IVa
342	EnsemblFungi	Ascomycota	Dothideomycetes	Pleosporales	Phaeosphaeria nodorum	Pnod2	SNOT_12044	MNGNGYPYPMRSFPSSRQNMMDNMDSGMGGFEDMNQGQSLDQASPYDALDQFYGIDSRQIVSQNDKAENIRRQSMPVYASNGTNNNRTQPMEMSPESRRLSMLNFGDPGDAGDFQFDMHAAGMNDMMRNNPSFPRPSGDMSQHNRNSANNMGLNTQFQNQNQNPPYSTMAAPGSAYASPLHPSAPLDLDMSPYPNGMNMSMDLDDSLNMMSGDMNMFSNNQFNTPMLESPVTQEFIGPMPAPNQDNSISAIPQGHFKRPSLSNTPETRSGVSGLGSRTSSQDQNSAPSQSRPQSEQRSSSKSNLPTQMSLSSLKAHQPVALDPAQDLPEEKMNQLKDYRTAWKPPAGGFPSTMHSNPHQKTQFKDAYSSTGFDMLGVLMRVATRPDPEIDIGSVDLSCA…	1079	119.361	8.619	58.84	-0.73	0(N)	Nucleus	3	PF13426;PF08447;PF00320	PAS domain;PAS fold;GATA zinc finger	AFVVCDAEMDDIPIVYCSENFERLTGYTRHMILGRNCRFLQSPDGKVEAGIKRKYVDDDSVLYLKNMINTRAEAQISLINYRRGGQPFMNLLTMIPIAWEPGGPMKFIVGFQVDL;LYLSPSSSRILEYEPSELIGTALSSVCHPSDIVPVTRELKETTNGGSVNVVFRIRRKKSGYMWFEGHGSLHTEQGK;CANCHTRTTPEWRRGPSGNRDLCNSCGLRWAKQ	399;605;956	513;680;988	4.2e-12;1.8e-08;3.7e-11	1	CANCHTRTTPEWRRGPSGNRDLCNSC	Type IVb
343	EnsemblFungi	Ascomycota	Dothideomycetes	Pleosporales	Phaeosphaeria nodorum	Pnod3	SNOT_13332	MTYATAAPATSGGQPGSPPVCQNCTTSTTPLWRRDESGSVLCNACGLFLKLHGRPRPISLKTDVIKSRNRVKTGGPGARKKAGETNGLPAAHPDADGSLALAQHRRTSGKISSGLSDRSQSPISRTGTPNFLHPSNIAPQHMFEQALNGDVFHSSALSAFGHRAPSPANSSINGMEAPLAAQNTALKTRVSEMELINDLFRNRVTELETSESAAKETEAKLRAELEEVRQRESSLKRRLDELDESPRHKKPRFSDISDLVDETRAGSPINAMTE	274	29.5287	9.134	66.72	-0.669	0(N)	Nucleus	2	PF00320;PF25026	GATA zinc finger;Asd-4-like domain	CQNCTTSTTPLWRRDESGSVLCNACGLFLKLHGR;LAAQNTALKTRVSEMELINDLFRNRVTELETSESAAKETEAKLRAELEEVRQRESSLKRRLDELDE	21;179	54;244	7.7e-12;1.8e-20	1	CQNCTTSTTPLWRRDESGSVLCNAC	Type IVa
344	EnsemblFungi	Ascomycota	Dothideomycetes	Pleosporales	Phaeosphaeria nodorum	Pnod4	SNOT_14013	MAHPSGSGGTSLAPTPTYPHHMSREASKDELEMAESLRRLNQAHDHHVTRTATPPHAQQPLPSPSEARSEIYHSLEDAKPILEGPATPATSASSPLPPGSVIGANAPISGQVCSNCKTTQTPLWRRSPTGETICNACGLYFKARNQHRPVNLKRNTNTQPIVPVQQSPAPSQENNGRTSPGNLAASPRVATYVAADQMSAGTCPGGGRCNGTGGQQGCSGCPAFNNRVSKTAKFALAQAQAASGCGSTDGANGNNATTGLPNGNASTSAIPACQNCGTTITPLWRRDDAGHIICNACGLYYKLHNKHRPVAMKKQEIKRRKRIVPANDTGSQATPSIADYSPPQRASQTPAFEHSASPDSSTAIESREDYTPEPKGPLAIDFTHYYGNNASITSYPNKL…	511	54.4157	8.903	55.56	-0.796	0(N)	Nucleus	2	PF00320;PF00320	GATA zinc finger;GATA zinc finger	CSNCKTTQTPLWRRSPTGETICNACGLYFKARNQ;CQNCGTTITPLWRRDDAGHIICNACGLYYKLHNK	113;273	146;306	1.4e-11;6.5e-12	2	CSNCKTTQTPLWRRSPTGETICNAC;CQNCGTTITPLWRRDDAGHIICNAC	Type IVa;Type IVa
345	EnsemblFungi	Ascomycota	Dothideomycetes	Pleosporales	Phaeosphaeria nodorum	Pnod5	SNOT_14196	MAMYQGEMGLNGLPTQQQLDLSSMPMMNMDMDMDLSLDGADANNAAGFAAFPNQMQSNVAASSTASDAGGYSMAQEISLSGAGAGPLPTGFGAPSMNPSGSTLTEFTKRRNWSQRVLEELRDLLHILTPDGRILYMSPSCKALTGWDPSQLTGRFINDFIHPDDIGIFVKEFNESIASGNPLRFFYRFRKIDDSCIIFESHGHPHLSSDSSSFAPPNALNCRGFFLMARPYPTKNAALLDSFLEHKIENERLTKRIAELKREEQDENDEWTRKTEGASQSETPTQPTQSIAPSDAASYAQMPPPAKPVISNTALTRQNLDEALAATKQDSINDKMARYEGANHLETIEMLTGLRYRDGERSQGISTGDASPNLIRGDAGIQISADRDGRGSSDKKKKLK…	500	55.0733	5.873	64.72	-0.597	0(N)	Nucleus	2	PF08447;PF00320	PAS fold;GATA zinc finger	ILYMSPSCKALTGWDPSQLTGRFINDFIHPDDIGIFVKEFNESIASGNPLRFFYRFRKIDDSCIIFESHGHPHLSSD;CTDCGTLDSPEWRKGPSGPKTLCNACGLRWAKKEKK	133;406	209;441	7.4e-09;2.4e-11	1	CTDCGTLDSPEWRKGPSGPKTLCNAC	Type IVb
346	EnsemblFungi	Ascomycota	Dothideomycetes	Pleosporales	Pleomassaria siparia CBS 279.74	Psip1	KAF2702660	MIDMSGDGINHYDMGPGQSLDDIVSQNEKANRRRSMPVYAQGSTQIGSPETRRMSMMTFGEHGSGSLDHFQFSISSDANMEGLMRGDSSYSQNPRNTQNIRLSSADLSVNTEMSNHNPQYSNMPNPASAYASPLDPSVSMDMNSPYPNGMSIPLDMHEALGMMPSDINMFSNSQFSNSIMDSPASPEYISPQPAPQSDPKAANLHTSDQFRNSSLSTTPDPRPSVPSRATSRDQSSAPPASRPISERQSSTQSIAPTDSGALPSQQEISAEALGQIKFPWRTPPGGFPSTMHSKPHVTTSYKNAYSSTGFDMLGVLMRVATRPNPMIDIGSVDLSCAFVVCDAQTPDNPIVYCSENFERLTGYSKHMILGRNCRFLQSPDGKVEPGIKRTYVDDDSVYY…	1013	111.596	8.132	62.37	-0.635	0(N)	Nucleus	3	PF13426;PF08447;PF00320	PAS domain;PAS fold;GATA zinc finger	AFVVCDAQTPDNPIVYCSENFERLTGYSKHMILGRNCRFLQSPDGKVEPGIKRTYVDDDSVYYLKNMIFTSAEAQISLINYRRGGQPFMNLLTMIPISWESTGPVKFYVGFQVDL;LYLSPSSNRILEYDPSELVGTALSSVCHPSDIVPVTRELKETSSGSSVNVVFRIRRKKSGYMWFEGHGSLHTEQGK;CANCHTRTTPEWRRGPSGNRDLCNSCGLRWAKQN	337;543;892	451;618;925	6.5e-11;1.6e-07;4.3e-11	1	CANCHTRTTPEWRRGPSGNRDLCNSC	Type IVb
347	EnsemblFungi	Ascomycota	Dothideomycetes	Pleosporales	Pleomassaria siparia CBS 279.74	Psip2	KAF2703611	MTHSSASGGTSLAPTPTHPHHLSREPSREDIEMAENLSLLNHSQHSNTSRTASLPQRRQSDTAPEGQSPEIYHSLEDTLAFQQGGQPEDAPTPATTASSAQTNPTGPNAPLTGQVCSNCNTTRTPLWRRSPTGETICNACGLYLKARNQSRPTNLKRPQNQTATPVHESPAPGQSHDRSVSPGNAGASSKCPTYVTADQVSTGTCPGGGRCNGTGGQQGCNGCPAYNNRVSKTAHLALAQANASTSSAEPRASETPGQSAAAGGTNLVPACQNCGTTITPLWRRDEAGHIICNACGLYFKLHGTHRPVAMKKQEIKRRKRVVPAAPGEGSTQAGSSIAGYSPQQRATRTPIFEPSVSPDPLTAIETSEDYPPEPRGPLAIDFTNYYSNASLSAPPPTTS…	521	54.9619	8.38	49.6	-0.864	0(N)	Nucleus	2	PF00320;PF00320	GATA zinc finger;GATA zinc finger	CSNCNTTRTPLWRRSPTGETICNACGLYLKARN;CQNCGTTITPLWRRDEAGHIICNACGLYFKLHGT	116;271	148;304	4.1e-10;1.4e-12	2	CSNCNTTRTPLWRRSPTGETICNAC;CQNCGTTITPLWRRDEAGHIICNAC	Type IVa;Type IVa
348	EnsemblFungi	Ascomycota	Dothideomycetes	Pleosporales	Pleomassaria siparia CBS 279.74	Psip3	KAF2708223	MAQHHGELRGGASQHTDRLAPNTSSSQRLLPYSPTTLDVDTEFFPSHNTPSQPPTANLDSTFDSPAACRGMLHEPYFPTLKNDAHGTDLEDPHRMAENDPLATQIWKLYSKAKTQLPNAERMENLTWRMMAMSMRRAELDRNKGLGQTNAMKPPPPQIPATTSTTAAAAAAAAASSTPRPAPSGIAQLRKSVDHQAQIQTPQTDAMNLDDFIFSSSVGSPAGLPPSPTNEVKASNASAPAIPIRKPTQSHDQNLCLARASAPSNPPLAPRDYEFGYVQRHVRKTSIDERRPPKRRAEASPLVPPVNSIMIPSDPESEAALNQYSLDHSMHQPAYHHSQPQVPFSIDTFQLHEDPIISSAGPFQQNFGFSPVGSPLMNQNPAYSNLYNPNSMASSLNSTD…	921	98.1154	8.541	52.54	-0.709	0(N)	Nucleus	2	PF08550;PF00320	Nitrogen regulatory protein areA, GATA-like domain;GATA zinc finger	IWKLYSKAKTQLPNAERMENLTWRMMAM;CTNCFTQTTPLWRRNPEGHPLCNACGLFLKLHGV	105;692	132;725	1e-09;7.2e-13	1	CTNCFTQTTPLWRRNPEGHPLCNAC	Type IVa
349	EnsemblFungi	Ascomycota	Dothideomycetes	Pleosporales	Pleomassaria siparia CBS 279.74	Psip4	KAF2710121	MEMLDVANRHSLGLPSINHLDSDKIKREEVEYQRKHSQQAMITSLHPFAGQPHSYSNHQSSTASTLPGPLGGLLSPPESRRTSGDEKEHQRPTRQSLPSIHEALGSEQPLSYPAPPSSVPVSVAQSYHPSSTTVSPSDSRSRNFSADLHAHPGPPNPFSHPQPRSPFVGVPSSTAPPPPPPPPPPPPPPPPPPQSQSQSQPPTAQTDSLPRPSFSEPRPSFSDSRPSYSEPRSSFSEQRPPFPESRPSYPASQHNPKLPTLHPLRTTQSPPAGTSRTNYPSYPQQPSSAYESSAPHSAGPMNPNYGYQQYPPNYPLSAPAPSGPNSAYPPSSSTYSAPSRYPPPSWRSDNELARMEEKKISRSSLAPYGESVKRHLESFDLEASLNEMAEGSGRITDFS…	1203	134.879	6.431	62.87	-0.754	0(N)	Cytoplasm	2	PF00320;PF03074	GATA zinc finger;Glutamate-cysteine ligase	CHSCNRAETPEWRRGPDGARTLCNACGLHYAKL;IYMDAMAFGMGSCCLQITFQAKNIEEGRKMYDQLSPLGPILLALTAATPIYKGFLADTDVRWNQISRAVDDRTCEELGEKPLHNDRWRLPKSRYASNSTYISQDSRLRPEYLDPDLVFDGELKQQLLDGGMDNLLATHFAHLFIRDPIVVFAEDLQEMDLTKADHFENLQSTNWQHMRFKPPPPGTDMGWRVEFRPMEIQITDFENAAFSIFIVLITRAILSYDLNFYIPITKVSDNMETAHIRDAVSGQKFWFRKDPFSPRSKGSATGTSTPADQSRPSTPFGPVEDEFERMSINDIVNGQADGFPGLIPLVESYLNSMNVDVETRCELARYLDLIRKRADGTLWTAAKWIRHFVQGHEKYAKD…	505;804	537;1186	5.2e-10;3.9e-171	1	CHSCNRAETPEWRRGPDGARTLCNAC	Type IVb
350	EnsemblFungi	Ascomycota	Dothideomycetes	Pleosporales	Pleomassaria siparia CBS 279.74	Psip5	KAF2713269	MTYATAAPASNGVQANSPPVCQNCSTSTTPLWRRDESGSVLCNACGLFLKLHGRPRPISLKTDVIKSRNRVKTGVQGGRKKHEGNGLAAAHPDADGSLALAQRMESIAQHRRTSGKISSGLSDRSQSPISRTGTPGLPHPSNIAPQHMFDGVLHPDAYQSPSIPSFLRQPSPGSTSSVNGSHLEPPMSYDALAAQNTMLRTRVSELEVINGLFQGRVRELESGEEDARRTSLTTQATEAQLRAELNEIKQRENDLKRRLDEYEHEGSRHKKMRLSDIVDESRAGPPIGPLEG	292	31.7091	9.113	69.21	-0.724	0(N)	Nucleus	2	PF00320;PF25026	GATA zinc finger;Asd-4-like domain	CQNCSTSTTPLWRRDESGSVLCNACGLFLKLHGR;SYDALAAQNTMLRTRVSELEVINGLFQGRVRELESGEEDARRTSLTTQATEAQLRAELNEIKQRENDLKRRLDEYEHE	21;188	54;265	3.7e-12;1.5e-24	1	CQNCSTSTTPLWRRDESGSVLCNAC	Type IVa
351	EnsemblFungi	Ascomycota	Dothideomycetes	Pleosporales	Pleomassaria siparia CBS 279.74	Psip6	KAF2713628	MDMDLAQLDPDSQTHKPPQTQQSFVPYLGPQQLQNGSANVPSDAFTLVQDSGQLAGAGAGPLPTGFGAPSLNPSGSTLTEFTKRRNWSQRVLEELRDFLHILTPDGRILYVSPSCKVLTGWDAASLIGRFIGEFIHPDDSAIFVKEFNESIASGNPLRFFYRFRKTDDSWIIFESHGHPHLSGDGNAYTPSTNLNCRGFFMMSRPYPTKNAALLDSFLEHKIENERLTKRIAELRREEKEETEAQDRHWVKKPDGHSSVTPSETHARTASDNHASAAYNAMPPPAKPGLPNTALTRQNLDEAQAASKPDSINDKMARYEGANHLETIEMLTGLRYRDGERSQGISTGDASPLLIRGDAGIQIAVDRDARSSSDKKKKLKMADEYVCTDCGTLDSPEWRK…	442	48.5817	6.682	64.12	-0.699	0(N)	Nucleus	2	PF08447;PF00320	PAS fold;GATA zinc finger	ILYVSPSCKVLTGWDAASLIGRFIGEFIHPDDSAIFVKEFNESIASGNPLRFFYRFRKTDDSWIIFESHGHPHLSGDGNA;CTDCGTLDSPEWRKGPNGPKTLCNACGLRWAKKEKK	108;386	187;421	6.5e-10;1.4e-11	1	CTDCGTLDSPEWRKGPNGPKTLCNAC	Type IVb
352	EnsemblFungi	Ascomycota	Dothideomycetes	Pleosporales	Pyrenophora seminiperda CCB06	Psem1	RMZ67364	MAMGGLNPMAGLPMNPEPSSMHGLPMDDVMQQMDLDLSSLDGGEGTNGGFSFADPQMQSSVPPNSTTGSEMQLTGAGAGPLPTGFGAPNMNPSGSTLTEFTKRRNWSQRVLEELRDLLHILTPDGRVLYVSPSCKALTGWEPSHIMGRFINEFIHPDDIGIFVKEFNESIASGNPLRFFYRFRKTDDSWIIFESHGHPHLSSDTNSFAPPNSINCRGFFMMARPYPTKNAALLDSFLEHKIENERLMKRIAELKREEQDEQDDWTKKTEGAATSMTPSESHATQNMSQADAVSYAQMPPPAKPVISNTALTRQNLDEALAASRPDSINDKMARYEGANHLETIEMLTGLRYRDGERSQGISTGDASPNLIRGDAGIQISMDRDGRNSSDKKKKLKIADE…	467	51.229	5.73	58.99	-0.669	0(N)	Nucleus	2	PF08447;PF00320	PAS fold;GATA zinc finger	LYVSPSCKALTGWEPSHIMGRFINEFIHPDDIGIFVKEFNESIASGNPLRFFYRFRKTDDSWIIFESHGHPHLSSD;CTDCGTLDSPEWRKGPNGPKTLCNACGLRWAKKEKK	128;402	203;437	2.6e-10;1.5e-11	1	CTDCGTLDSPEWRKGPNGPKTLCNAC	Type IVb
353	EnsemblFungi	Ascomycota	Dothideomycetes	Pleosporales	Pyrenophora seminiperda CCB06	Psem2	RMZ70131	MAVVKLVKLRWVDIDSTPSSDTSGHYLLCLLARLVVGVHLYSPLAPYTKGFPPYRTSILEERHAFLDPNTSSRLPRWLLPFSLGPRPSILQVFDLPAFKTPTTANFEDKLPSIGHDISRPSSSSTVASFTQQRPGSNASIQLPSLATLASAASNCPAANINNDRNDNMKRETPERKAPSPLGKPSHGLSMTYATSAPATAGGQAGSPPVCQNCSTSTTPLWRRDETGAVLCNACGLFLKLHGRPRPISLKTDVIKSRNRVKTGGPGRKRTSDQGGLPAAHPDADGQLALAQHRRASGKISSGLSDRSQSPISRTGTPNFNHPSNIAPQHMFEQALHSDFHSPSLPGFGLRAPSPANSSINGSHLEAPLPYETLAAQNTALKTRVSEMELINDLFRNRVS…	466	50.6345	9.49	72.1	-0.565	0(N)	Cytoplasm|Nucleus	2	PF00320;PF25026	GATA zinc finger;Asd-4-like domain	CQNCSTSTTPLWRRDETGAVLCNACGLFLKLHGR;YETLAAQNTALKTRVSEMELINDLFRNRVSELEQSEQSARQTEKNLRQELEEIKQREADLKRRLDEIEG	210;370	243;438	1.7e-11;1.2e-22	1	CQNCSTSTTPLWRRDETGAVLCNAC	Type IVa
354	EnsemblFungi	Ascomycota	Dothideomycetes	Pleosporales	Pyrenophora seminiperda CCB06	Psem3	RMZ70307	MAIPHPAFVLAASAFYRRCTSRRSLRNLAHLNTEKAAPPNSRAGCRPRMLDAIRPAAVVTHLRTDEAIAHNTARGPTTPFDAYNPGPDDHRNCQQRPRRQQVATMNGYPYPTRSNGNMMMDMNGDGMNSYDMVVEGQSLDSIVAQNDKDNRRRSMPVFARQSQQQQQQQLNLGSPDTRRLSMMNFGDPHGGDMEEFQFDMSTAAMDNMMRGNTAFPRTTADMQNDRLPTADLTINSQFQGQTSPFPSIGAPGSNYASPMHQKNPMDMEMGSYQNGLPMPLDMDDSLHMMPTDINMFPGSQFSTPLIDSPLPQDYSGPMPAAQQGNNTPSAQSQDHFKRPSMSNTPDAKSGRSSFLGRTSSQDQVSMRSSSRPQSEQHSSSSVPTRMALASLQNQQPIGQ…	1094	120.88	9.297	57.36	-0.732	0(N)	Nucleus	2	PF13426;PF00320	PAS domain;GATA zinc finger	AFVVCDAELDDIPIVYCSENFERLTGYTRHMILGRNCRFLQAPDGKVESGIKRNYVDDDSVYYLKNMIESRAEAQISLINYRRGGQPFMNLLTMIPIAWESGGKMKFFVGFQVDL;CANCHTRTTPEWRRGPSGNRDLCNSCGLRWAKQ	478;962	592;994	4.4e-12;3.7e-11	1	CANCHTRTTPEWRRGPSGNRDLCNSC	Type IVb
355	EnsemblFungi	Ascomycota	Dothideomycetes	Pleosporales	Pyrenophora seminiperda CCB06	Psem4	RMZ72467	MFQELEARRSPRHLPIHIIFPGKQAETRWRWPRMQNTGYDASNAPVTGQICRGKALTDRSNCKTTQTPLWRRSPSGETVCNACGLYMKARNQSRPVNLKRNTSTQILPVQQSQTPGPGDASRTSPGNLAASPRVATYVAADQMAAGTCPGGGRCNGTGGQQGCSGCPAFNNRVSKTAKFALAQANAAEGKNVIDGNGGASAAPSSTSAIPACQNCGTTITPLWRRDDAGHIICNACGLYYKLHGTHRPVAMKKQEIKRRKRVVPAGETGSLATSSVANYSPPPPQQQQRPSQTPASFEHSASPDPSTALESREEYTPEPPRGPIAVDFTHYYGNMSTSASSNPSSSSSLLPTTTQQQHHQPQPNAPSPRKRSRSATMDPEEQPQPTNPAQQHPANPTPH…	478	51.3767	9.425	52.41	-0.837	0(N)	Nucleus	2	PF00320;PF00320	GATA zinc finger;GATA zinc finger	SNCKTTQTPLWRRSPSGETVCNACGLYMKARN;CQNCGTTITPLWRRDDAGHIICNACGLYYKLHGT	60;212	91;245	1.2e-10;1.3e-12	2	SNCKTTQTPLWRRSPSGETVCNAC;CQNCGTTITPLWRRDDAGHIICNAC	Type IVp;Type IVa
356	EnsemblFungi	Ascomycota	Dothideomycetes	Pleosporales	Pyrenophora teres	Pter1	EFQ89298	MESSKPSHGLSMTYATSAPATAGGQAGSPPVCQNCSTSTTPLWRRDETGAVLCNACGLFLKLHGRPRPISLKTDVIKSRNRVKTGGPGRKRTSDQGGLPAAHPDADGQLALAQHRRASGKISSGLSDRSQSPISRTGTPNFNHPSNIAPQHMFEQALHSDFHSPSLPGFGLRAPSPANSSINGSHLEAPLPYETLAAQNTALKTRVSEMELINDLFRNRVSELEQSEQSARQTESTLRQELEEVKQREADLKRRLDEIEGDSPRHKKMKMSEFVDESRAGTPISAMVD	288	31.2385	8.928	63.78	-0.737	0(N)	Nucleus	2	PF00320;PF25026	GATA zinc finger;Asd-4-like domain	CQNCSTSTTPLWRRDETGAVLCNACGLFLKLHGR;YETLAAQNTALKTRVSEMELINDLFRNRVSELEQSEQSARQTESTLRQELEEVKQREADLKRRLDEIEG	32;192	65;260	9e-12;7.3e-23	1	CQNCSTSTTPLWRRDETGAVLCNAC	Type IVa
357	EnsemblFungi	Ascomycota	Dothideomycetes	Pleosporales	Pyrenophora teres	Pter2	EFQ89799	MEVSPHQDSARHGLLQDAIFPAFGNDAGTPNADSPEEMQKNDPLGTQIWKLYSRAKTQLPNAERMENLTWRMMAMNMRRADMHRNNKGYGCLPLAFASLPAHAPQPAADHGMWCRYAQDSHSNEMMPPPPASASAGAVGAAAAAAAAAVSARPPPRSAPSGIAQQLRKSQDHQAQATQPPQDAMNLDDFIFPSSVGSPAGLSPELSNEDAAPFNPPAPAIPIRKPHLASDHNLSLARASAPSVPPTISREDEFGYVPRHVRKTSIDERRPPKRRAEASPQVPPVNSIMIPTDAQAEADLHQYSLDHNTMQPPTFPASQAQNPFSMENYQMHDDPVIHSAGPYQQNFSGFSPVGSPLMSHNAFNSTMFNHNSMASSLNSADYYSPPSSAFPSTVSTPQPI…	889	94.8559	7.071	47.78	-0.72	0(N)	Nucleus	2	PF08550;PF00320	Nitrogen regulatory protein areA, GATA-like domain;GATA zinc finger	IWKLYSRAKTQLPNAERMENLTWRMMAM;CTNCFTQTTPLWRRNPEGHPLCNACGLFLKLHGV	48;671	75;704	3.2e-09;6.9e-13	1	CTNCFTQTTPLWRRNPEGHPLCNAC	Type IVa
358	EnsemblFungi	Ascomycota	Dothideomycetes	Pleosporales	Pyrenophora teres	Pter3	EFQ90531	METLEAPSRQSIGLPSINHMDADRVKREEVEYQRKRQAVSMSSPLHPYGGPPHLHSNHQSSIASAVPGSLGGLLSPPESRRTSGDEKDSQRPTPRQSLPSIHEALGSEQPSLSFPTTVPPPSSITSAPQHYPPPSANTSPASQRPRHLPSDLQHAGQGPSNPFSHSRSPFPPTSQAGPPLPPQAQQESFPRAPYSEPRPPYSTAQHTQKLPALHPLKTAPSPPASAARPPYSSYPPSAATYESAAPPSAGPMSQRHPYSQYPPSYPPSAQSASAPNSAYPPASATYSAPSRYPQQTWQDNAEMARLEEKKIGRASLAPYGESVKRHLESFDLEASLNEMADGSGHIAEFSKIYRQRAHENQRIGLTPQSMPRLEEVDDMLKQSERIQMSLQRMRDVVFN…	1176	131.09	6.527	66.93	-0.669	0(N)	Cytoplasm|Nucleus	2	PF00320;PF03074	GATA zinc finger;Glutamate-cysteine ligase	CHSCNRAETPEWRRGPDGARTLCNACGLHYAKL;IHMDAMAFGMGSCCLQITFQAKNIEEGRKMYDQLSPIAPILLALTAATPIYKGFLADTDVRWNQISNAVDDRTPEELGEKPLQNDRWRLPKSRYASNSTYISQDPRLRPEYLDPDLIIDTDIKKRLVEGGMDDLLATHFAHLFIRDPIVVFAEDLQELDLTKADHFENLQSTNWQHMRFKPPPAGSDMGWRVEFRPMEIQITDFENAAFSIFIVLLTRAILSFNLNFYIPITLVSENMETAHIRDAVSTQKFWFRKDPFSTHKSSGTGTSTPAETFSRPATPTGPVEDEYTQMTINEVINGQVTSDGDGFPGLIPLVESYLNSMNVDVETRCDLATYLDLIRKRANGTYWTAAKWIRHFVQTHPE…	456;772	488;1158	5.1e-10;3.4e-174	1	CHSCNRAETPEWRRGPDGARTLCNAC	Type IVb
359	EnsemblFungi	Ascomycota	Dothideomycetes	Pleosporales	Pyrenophora teres	Pter4	EFQ92491	MAESLRLLNQAHEHHKPRTETPSHDQQQHMDAQEDQRSEIYHSLEDAVPIPDGPTVPPTSTSLQIQNINYEASNAPVTGQVCSNCKTTQTPLWRRSPSGETVCNACGLYMKARNQSRPVNLKRNTSNHILPTQQSSTPGPGDGSSTSPGNLAASPRVATYVAADQMAAGTCPGGGRCNGTGGQQGCSGCPAFNNRVSKTAKFALAQANAAEGKNVIDATGTTAASTSAIPACQNCGTTITPLWRRDDAGHIICNACGLYYKLHGTHRPVAMKKQEIKRRKRVVPAGDTGSHAASSVANYSPPQRPSQTPAFENSASPDPSTALESREEYTPEPPRGPIAVDFTHYYGNLSTTSHPSSLVPNTQPSAPSPRKRSRSATMDPEEPVNPAPHRPNAISSILN…	465	49.8295	7.606	54.67	-0.829	0(N)	Nucleus	2	PF00320;PF00320	GATA zinc finger;GATA zinc finger	CSNCKTTQTPLWRRSPSGETVCNACGLYMKARN;CQNCGTTITPLWRRDDAGHIICNACGLYYKLHGT	82;232	114;265	1.5e-11;1.2e-12	2	CSNCKTTQTPLWRRSPSGETVCNAC;CQNCGTTITPLWRRDDAGHIICNAC	Type IVa;Type IVa
360	EnsemblFungi	Ascomycota	Dothideomycetes	Pleosporales	Pyrenophora teres	Pter5	EFQ92719	MNGYPYPARPFSQQPNGNMMMGMNGDGMNNYTMIEGQSLDSIVAQNDKDNRRRSMPIFARQMSQNQRQQQLNLGSPDTRRLSMMNFGEPNGGDMEEFQFGMSTTAMDNMMRGNTTFPHTTADMQNDRLPAADLTISSQFQGQTSPFPSMGGPGSNYASPMHQKNSLDMDMTSYQNGLPMSLDMDDSLHMMSTDMNMFPGSQFSTPMIDSPLPQDFAGSIPAAQQGNNTPSAQSQDQFKRPSTSNTPDAKSGRSSFLGRTPSQDQVSMRSTSRPQSDQHSSNSVPTRMTLASLQNQQPIGQDPAQDLPKEVMNKQLQDFKIPWPTPAGGFPSTKHQNPHMKTQFKNAYSSTGFDMLGVLMRVASRPEPQIDIGSVDLSCAFVVCDAELDDIPIVYCSENF…	1070	118.347	8.89	57.61	-0.717	0(N)	Nucleus	3	PF13426;PF08447;PF00320	PAS domain;PAS fold;GATA zinc finger	AFVVCDAELDDIPIVYCSENFERLTGYTRHMILGRNCRFLQAPDGKVESGIKRNYVDDDSVYYLKNMIESRAEAQISLINYRRGGQPFMNLLTMIPIAWEPGGKMKFFVGFQVDL;LYLSPASNRILEYDPSELVGTALSSVCHPSDIVPVTRELKETTSGASVNVVFRIRRKKSGYMWFEGHGSLHTEQGK;CANCHTRTTPEWRRGPSGNRDLCNSCGLRWAKQ	379;586;940	493;661;972	4.6e-12;2.2e-07;3.6e-11	1	CANCHTRTTPEWRRGPSGNRDLCNSC	Type IVb
361	EnsemblFungi	Ascomycota	Dothideomycetes	Pleosporales	Pyrenophora teres	Pter6	EFQ93425	MAQYQNGGAEMGALNPMAGLPMHPEPSSMHGMPMDDVMQQMDLDMSSLDGAEGTNGGFSFADPQMQSVPPNSTTGSEMQLTGAGAGPLPTGFGAPNMNPSGSTLTEFTKRRNWSQRVLEELRDLLHILTPDGRVLYVSPSCKALTGWEPSNVMGRFINEFIHPDDIGIFVKEFNESIASGNPLRFFYRFRKTDDSWIIFESHGHPHLSSDTNSFAPPNSINCRGFFMMARPYPTKNAALLDSFLEHKIENERLMKRIAELKREEQDEHDDWNRKTEGAGTSMTPSESHVTQNMSQADAASYAQMPPPAKPVISNTALTRQNLDEALAASKPDSINDKMARYEGANHLETIEMLTGLRYRDGERSQGISTGDASPNLIRGDAGIQISIDRDGRNSSDKKK…	474	52.0378	5.702	56.69	-0.695	0(N)	Nucleus	2	PF08447;PF00320	PAS fold;GATA zinc finger	LYVSPSCKALTGWEPSNVMGRFINEFIHPDDIGIFVKEFNESIASGNPLRFFYRFRKTDDSWIIFESHGHPHLSSD;CTDCGTLDSPEWRKGPNGPKTLCNACGLRWAKKEKK	135;409	210;444	4.6e-10;1.5e-11	1	CTDCGTLDSPEWRKGPNGPKTLCNAC	Type IVb
362	EnsemblFungi	Ascomycota	Dothideomycetes	Pleosporales	Pyrenophora tritici-repentis	Ptrit1	PZD08171	MESSKPSHGLSMTYATSAPATAGGQAGSPPVCQNCSTSTTPLWRRDETGAVLCNACGLFLKLHGRPRPISLKTDVIKSRNRVKTGGPGRKRTSDQGGLPAAHPDADGQLALAQHRRASGKISSGLSDRSQSPISRTGTPNFNHPSNIAPQHMFEQALHSDFHSPSLPGFGLRAPSPANSSINGSHLEAPLPYETLAAQNTALKTRVSEMELINDLFRNRVSELEQSEQSARQTESTLRQELEEVKQREADLKRRLDELEGDSPRHKKMKMSEFVDESRAGTPISAMVD	288	31.2385	8.928	63.78	-0.739	0(N)	Nucleus	2	PF00320;PF25026	GATA zinc finger;Asd-4-like domain	CQNCSTSTTPLWRRDETGAVLCNACGLFLKLHGR;YETLAAQNTALKTRVSEMELINDLFRNRVSELEQSEQSARQTESTLRQELEEVKQREADLKRRLDELEG	32;192	65;260	9e-12;5.4e-23	1	CQNCSTSTTPLWRRDETGAVLCNAC	Type IVa
363	EnsemblFungi	Ascomycota	Dothideomycetes	Pleosporales	Pyrenophora tritici-repentis	Ptrit2	PZD10065	MAESLRLLQAHEHHKPRTETPSQEQQMDTQEDQRSEIYHSLEDAVPIPDGPAVPATSTSLQIQNINYDASNATVTGQVCSNCKTTQTPLWRRSPSGETVCNACGLYMKARNQSRPVNLKRNTSTQILPTQQSPTPGPGDGSSTSPGNLAASPRVATYVAADQMAAGTCPGGGRCNGTGGQQGCSGCPAFNNRVSKTAKFALAQANAAEGKNVIDATGTSAASTSAIPACQNCGTTITPLWRRDDAGHIICNACGLYYKLHGTHRPVAMKKQEIKRRKRVVPAGDTGSHAASSVANYSPPQRPSQTPAFEHSASPDPSTALESREEYTPEPPRGPIAVDFTHYYGNLSTTSNPSSLIPNTQPSAPSPRKRSRSATMDPEEPVNPAPHRPNAISSILNPSQ…	766	83.2166	5.939	58.42	-0.702	0(N)	Cytoplasm|Nucleus	3	PF00320;PF00320;PF01753	GATA zinc finger;GATA zinc finger;MYND finger	CSNCKTTQTPLWRRSPSGETVCNACGLYMKARN;CQNCGTTITPLWRRDDAGHIICNACGLYYKLHGT;CSFCSKSESEVGKPGLSRCGRCGTATYCGDECQKADWKVHRVVC	79;229;671	111;262;714	2.8e-11;2.3e-12;8.4e-07	2	CSNCKTTQTPLWRRSPSGETVCNAC;CQNCGTTITPLWRRDDAGHIICNAC	Type IVa;Type IVa
364	EnsemblFungi	Ascomycota	Dothideomycetes	Pleosporales	Pyrenophora tritici-repentis	Ptrit3	PZD11601	MNPEPSSMHGMPMDDVMQQMDLDLSSLDGAEGTNGGFSFADPQMQNVPPNSTTGSEMQLTGAGAGPLPTGFGAPNMNPSGSTLTEFTKRRNWSQRVLEELRDLLHILTSDGRVLYVSPSCKVLTGWEPSNVMGRFINEFIHPDDIGIFVKEFNESIASGNPLRFFYRFRKTDDSWIIFESHGHPHLSSDTNSFAPPNSINCRGFFMMARPYPTKNAALLDSFLEHKIENERLMKRIAELKREEQDEQDDWNKKTEEVGTSMTPSESHVTQNMSQADAVSYAQMPPPAKPVISNTALTRQNLDEALAASKPDSINDKMARYEGANHLETIEMLTGLRYRDGERSQGISTGDASPNLIRGDAGIQISMDRDGRNSSDKKKKLKIADEYVCTDCGTLDSPEW…	453	50.1217	5.578	57.97	-0.712	0(N)	Nucleus	2	PF08447;PF00320	PAS fold;GATA zinc finger	LYVSPSCKVLTGWEPSNVMGRFINEFIHPDDIGIFVKEFNESIASGNPLRFFYRFRKTDDSWIIFESHGHPHLSSD;CTDCGTLDSPEWRKGPNGPKTLCNACGLRWAKKEKK	114;388	189;423	1.4e-09;1.4e-11	1	CTDCGTLDSPEWRKGPNGPKTLCNAC	Type IVb
365	EnsemblFungi	Ascomycota	Dothideomycetes	Pleosporales	Pyrenophora tritici-repentis	Ptrit4	PZD17713	MNGYPYPTRPFTQPPNGNMMMDINGDGMNNYDMVEGQSLDSIVAQNDKDNRRRSMPVFVRQTSQHQQQQLNLGSPDTRRLSMMNFGDPNGGDMEEFQFDMSTAAMDNMMRGNTTFPRTSADMQNDRLPAADLTINSQFQGQTSPFPSIGGPGSNYASPMHQKNPLDMDMGSYQNGLPMTLDMDDSLHMMPTDMNMFPGSQFSTPMIDSPLPQDFPGSMPAAQQGNNTPSAQSQDQFKRPSMSNTPDAKSGRSSFLGRTPSQDQVSMRSNSRPQSDPHSSNSVPTRMTLASLQNQQPIGQDPAQDLPKEVMNKQLQDFKIPWPTPAGGFPSTKHQNPHQKTQFKNAYSSTGFDMLGVLMRVASRPEPQIDIGSVDLSCAFVVCDAELDDIPIVYCSENFE…	1069	118.322	8.699	59.02	-0.717	0(N)	Nucleus	3	PF13426;PF08447;PF00320	PAS domain;PAS fold;GATA zinc finger	AFVVCDAELDDIPIVYCSENFERLTGYTRHMILGRNCRFLQAPDGKVESGIKRNYVDDDSVYYLKNMIESRAEAQISLINYRRGGQPFMNLLTIIPIAWEPGGKMKFFVGFQVDL;LYLSPASNRILEYDPSELVGTALSSVCHPSDIVPVTRELKETTSGASVNVVFRIRRKKSGYMWFEGHGSLHTEQGK;CANCHTRTTPEWRRGPSGNRDLCNSCGLRWAKQ	378;585;939	492;660;971	4.6e-12;2.2e-07;3.6e-11	1	CANCHTRTTPEWRRGPSGNRDLCNSC	Type IVb
366	EnsemblFungi	Ascomycota	Dothideomycetes	Pleosporales	Pyrenophora tritici-repentis	Ptrit5	PZD19399	MEVSPQQDSARRGLLQDAIFPAFGNDAGTPNADSPEEMQKNDPLGTQIWKLYSRAKTQLPNAERMENLTWRMMAMNMRRADMHRNNKGSDQNSYSNEMMPPPPACAGAGPAAVSPRPPPRSAPSGIAQQLRKSQDQQAQATQPSQDAMNLDDFIFPSSVASPAGLSPELSNEDAAPFNPPAPAIPIRKPHLASDHNLSLARASAPSVPPTISREDEFGYVPRHVRKTSIDERRPPKRRAEASPQVPPVNSIMIPTDAQAEADLHQYSLDHNTMQPPTFPASQAQNPFAMENYQMHEDPVIHSAGPYQQSFPGFSPVGSPLMSHNAFNSTMFNHNSMASSLNSTDYYSPPSSAFPSTVSTPQPIPEDNQMYFDRNGMEMRHTHSAASYGTHRPSNLSTSM…	794	85.5018	6.476	48.53	-0.754	0(N)	Nucleus	2	PF08550;PF00320	Nitrogen regulatory protein areA, GATA-like domain;GATA zinc finger	IWKLYSRAKTQLPNAERMENLTWRMMAM;CTNCFTQTTPLWRRNPEGHPLCNACGLFLKLHGV	48;632	75;665	2.8e-09;6e-13	1	CTNCFTQTTPLWRRNPEGHPLCNAC	Type IVa
367	EnsemblFungi	Ascomycota	Dothideomycetes	Pleosporales	Sporormia fimetaria CBS 119925	Sfim1	KAF2742104	MPILIVLLSINPTARLSLLSLADIHQPVCLNCSTSTTPLWRRDDAGSVLCNACGLFLKLHGRPRPMTLKTDVIKSRNRVKTGAPGSRKKGPEVNSLPAAHPAAHPNADPALALEYAQHRRASGKMPSGLSEQSHSPVSRTGTPSFAPASNIAPQHMFDGALDPNAFHSPALSTGFPPRQPSPSAASMVNGSQMEPMQSYEALKMRVSELEVINDLFRGRVAELEAAETQLKEERNQFQEELNNARQREEALKRRVEELESEDLPHKRMRMSDLVDESRAGSPLSTLAG	288	31.4324	8.378	76.32	-0.501	0(N)	Cytoplasm|Nucleus	2	PF00320;PF25026	GATA zinc finger;Asd-4-like domain	CLNCSTSTTPLWRRDDAGSVLCNACGLFLKLHGR;MEPMQSYEALKMRVSELEVINDLFRGRVAELEAAETQLKEERNQFQEELNNARQREEALKRRVEELESE	29;193	62;261	4.7e-11;1.2e-15	1	CLNCSTSTTPLWRRDDAGSVLCNAC	Type IVa
368	EnsemblFungi	Ascomycota	Dothideomycetes	Pleosporales	Sporormia fimetaria CBS 119925	Sfim2	KAF2745940	MLHKPIFPTLENDVGDADLDNMEEMQRNDPLQTQIWKLFSNAKKQLPNAERMENLTWRMMAMNMRRVEAGRNKGPRSANDMMPPPTPMSTSSAPPKTAPSGIAQLRRSIDERTQAQQPDAMNLDDFIYPSSVASPAGFDTSIPNEPTPTNASHATAPAIPIRKQQTHDFSLAHASAPPVPPHVVHENEFGYVQRHVRKTSIDERRPPKRRADASPQVPAVNSIMIPTDPEAETALHSYTLDQSMQTHSFQHTQPQVPFAIDTFQLNEDPIISSAGPFQQNFTFSPVGSPLMNQAHGFSGIYNPNSMASSLNSTDFYSPPGSAFPSAVSTPQPIAEGAEMYFDRSGMDIRGPQTGNYSSHRPSNLSNSMQAQYIFNPNGTGDSMFSPVTNVNTSTSFPAP…	830	89.283	7.797	47.01	-0.748	0(N)	Nucleus	2	PF08550;PF00320	Nitrogen regulatory protein areA, GATA-like domain;GATA zinc finger	IWKLFSNAKKQLPNAERMENLTWRMMAM;CTNCFTQTTPLWRRNPEGQPLCNACGLFLKLHGV	35;604	62;637	4.7e-09;2.9e-13	1	CTNCFTQTTPLWRRNPEGQPLCNAC	Type IVa
369	EnsemblFungi	Ascomycota	Dothideomycetes	Pleosporales	Sporormia fimetaria CBS 119925	Sfim3	KAF2746241	METLNGVNPVRPTSVVGLPSINHLDGDRIKREEGDYQGNHSAPASTMVSPSHPFPGALHAFNNHQSLPATSLPATAGGLLSPPASRRTSNEEFKDQRPVPRQPQPLPSIHEALGPEPPLSYPPPPPPPQVPVSVSQSYYSPPSTAPHAEHRPRSFSIDHINGQGPLNPYATPRSPFQTKPVSTLPPPPPPPAQQNHKLPSLHPIKTTQSPPVPATRSTPAYPPYTPSSSSAYQPLAPPASGPMNPPYRYSMHPAEYPLSAPPPGPFTPRYPPSETYSAPPGYPPNSWRPDNADFSRSEEKKRSSLAHYGDSVKRHLERFDLEASLNEMAEGAGRVADFSKVYRQRAHETQRTGMTLHAMPRLEEVDEMLKNSEKIQISLQRMRQVVVNHQQAALAEPQP…	1155	129.15	6.854	67.27	-0.679	1(o960-982i)	Cytoplasm	2	PF00320;PF03074	GATA zinc finger;Glutamate-cysteine ligase	CHSCNRAETPEWRRGPDGARTLCNACGLHYAKVT;IYMDAMAFGMGSCCLQITFQAKNIEEGRKMYDQLSPLGPILLALTAATPIYKGFLADTDVRWNQISAAVDDRTPEELGEKPLQNDRWRVPKSRYASNSTYISEDPRLRPEYLDPNLVFDPAIKSRLIEGGMDPLLATHFAHLFIRDPIVVFAEDLQTLDLSKADHFENLQSTNWQHMRFKPPPPGSDMGWRVEFRPMEIQITDFENAAFAVFIVLITRAILSFGLNFYIPIQRVTENMETAHRRDAVLGEKFWFRKDPFGPRNSGSNGGSRPATPPPVDEEYTLLSVNEIINGQHSSSESSTTGFPGLIPLVESYLDSMNVDVETRCELARYLDLIRKRADGRLWTAAKWIREFVKEHPEYRHD…	444;754	477;1135	2.9e-10;6.8e-170	1	CHSCNRAETPEWRRGPDGARTLCNAC	Type IVb
370	EnsemblFungi	Ascomycota	Dothideomycetes	Pleosporales	Sporormia fimetaria CBS 119925	Sfim4	KAF2747583	MGIDYAVQPGQSLDDMAQQADKTDPRRKSMPAYGAVQMDNLDPRRFSMMGFGTDMSAIDFDSFQFNPQTGAPMTSDMMRGTTSFPHTAAELPAGRMGTASNLAINTQFANQNNTFANMHTPNLAYPSPMHPNTSLGIDMNTYQQALSMPLGLGDNLGMMGSDMGMFSGAQFASPVVASPMNQDFMVGMQSPLGQPGSNVGRFPFANTPMGPPSTTRRTVPVPVPSSSSQGQKSPQPGQRAEQPNPTSNPQTQVAVRAPAVPQPSNEQSNSAIQQDVVASFAQMNFPWTTPTGGFPGTMNNNPHTKTEFKNAYSSSGFDMLGTLMRVATRPDPKIDIGSVDMSCAFVVCDAQSEDCPIVYCSENFERLTGYARDNIVGVNCRFLQSPDGRVDRGSRRLFS…	1022	111.788	9.104	61.57	-0.572	0(N)	Nucleus	3	PF13426;PF08447;PF00320	PAS domain;PAS fold;GATA zinc finger	AFVVCDAQSEDCPIVYCSENFERLTGYARDNIVGVNCRFLQSPDGRVDRGSRRLFSEEKSINYLRDAIEKQEEAQVSLVNYRYGGQPFVNMLTMIPIAWEPGGPIRFFVGFQVDIV;LYLSPSSNRVLEYDPSELVGTSLSSICHPSDIVPVTRELKETTNGVSVNVVFRVRRKKSGYMWFEGYGSLHTEQGK;CANCHTRTTPEWRRGPSGNRDLCNSCGLRWAKQM	344;551;898	459;626;931	4.7e-14;3.9e-07;2.3e-11	1	CANCHTRTTPEWRRGPSGNRDLCNSC	Type IVb
371	EnsemblFungi	Ascomycota	Dothideomycetes	Pleosporales	Sporormia fimetaria CBS 119925	Sfim5	KAF2747906	MANRSCTGGTSLAPMPTHPHHLSREPSREDIEMAENLSLLNNAQDRPPSRTQSREQEPESTKSSQQSSPAQEEPSEIYHSLEDAVPLPGQPSTPTSTAASVSLSYAGWSNAPTAGQVCSNCGTTRTPLWRRSPAGETICNACGLYQKARNQPRPINVRRPVQPSPAASSRSLAPPLPSPAPEQKVSDRSVSPATQPGGSPRGATYVAAAKESSGTCPGGGRCNGTGGQQGCNGCPAYNNRVSRTAQVVPVGRCRSEAVGGSEEAGQVAVASASVVVACHNCGSTVTPLWRRDDQGHTICNACGLYFRLHGKARPTVMKKSEIKRRKRIVPAGFEGDSPPPSSIAGLSPSLYNVQPAGWESVSPGPSPVPMAATSDLEGLSQRAPVAIDFTNYYRNGPSV…	511	54.5793	8.73	56.4	-0.731	0(N)	Nucleus	2	PF00320;PF00320	GATA zinc finger;GATA zinc finger	CSNCGTTRTPLWRRSPAGETICNACGLYQKARN;CHNCGSTVTPLWRRDDQGHTICNACGLYFRLHGK	118;278	150;311	5.8e-11;8.6e-12	2	CSNCGTTRTPLWRRSPAGETICNAC;CHNCGSTVTPLWRRDDQGHTICNAC	Type IVa;Type IVa
372	EnsemblFungi	Ascomycota	Dothideomycetes	Pleosporales	Sporormia fimetaria CBS 119925	Sfim6	KAF2751175	MYPNSGAAEIPLSSMADMSGDAASAGLVPSLDVDIDMDLSQIDGQSGPAQAAFPQFAGQQQLPQDMGPNSTGDGYGIPQDDSPGAVPGAGPLPASFPGHNPTGSTLTEFTKRRNWSQRVFEEMRDFLHILTPDGRFLYVSPSCKELTGWEPVHLIGQFINNYIHPDDSAIFVQEFKDAVASGNPIRFFYRFKKADDTWAIFEAHGHPHLSNTPTAPFAAQSQLICHGFFMISRPYPTKNAALLDSFLEHKIENERLMKRIAELKREEIEELEQEDSQWRSRADTYSSVATSPLHGPVDSEAYNAMPPPAKPSISNTALTRQNLDEATAVNKPEGITDKMARYEGTTHLEQIEMLTGLRYRDGERSKGISTGDASPLLIRGDAGIQISIDRDARSSTDRK…	480	52.8535	5.48	63.73	-0.636	0(N)	Nucleus	2	PF08447;PF00320	PAS fold;GATA zinc finger	LYVSPSCKELTGWEPVHLIGQFINNYIHPDDSAIFVQEFKDAVASGNPIRFFYRFKKADDTWAIFEAHGHPH;CTDCGTLDSPEWRKGPNGPKTLCNACGLRWAKKEKK	137;410	208;445	1.3e-09;1.5e-11	1	CTDCGTLDSPEWRKGPNGPKTLCNAC	Type IVb
373	EnsemblFungi	Ascomycota	Dothideomycetes	Pleosporales	Stagonospora sp. SRC1lsM3a	Ssrc1	OAK95271	MNGNSYPYPMRAFPSSRPNMMDNIENDMGAFGDLNQGQSLDQIVSQNDKAENIRRRSMPVYAHSSNRNQPMDMSPESRRLSMMNFGDPNAAQDFQFDVQTAGMEDMMRNNPSFPRNSADMQHGRSSANDLGLNTQFQQQNSPYSTMAAPGSAYASPLHPTAQLDMDLGSFPNNMSMSMDMDESLNMMSNDMNLFPNNQFNPSMMASPVAQEFIGPMPAPNQDNVSSLQRSSHFKRPSMSNTPDARSAGSSMPSRTTSQDQNSIRSNSRPSIEQQQSSKNSVPTQMSLTSLKKQQPIALDPAQDIPEDTLKQLGDFKSTWTPPAGGFPSTMHSNPHMKTQFKNAYSSTGFDMLGVLMRVAARPDPQIDIGSVDLSCAFVVCDAEMDDIPIVYCSENFERL…	1063	117.828	8.72	57.64	-0.732	0(N)	Nucleus	3	PF13426;PF08447;PF00320	PAS domain;PAS fold;GATA zinc finger	AFVVCDAEMDDIPIVYCSENFERLTGYTRHMILGRNCRFLQSPDGKVEAGIKRKYVDDDSVLYLKNMINTRAEAQISLINYRRGGQPFMNLLTMIPIAWEPGGPMKFFIGFQVDL;LYLSPSSSRILEYDPSELIGTALSSVCHPSDIVPVTRELKETTNGGSVNVVFRIRRKKNGYMWFEGHGSLHTEQGK;CANCHTRTTPEWRRGPSGNRDLCNSCGLRWAKQ	376;582;933	490;657;965	2.1e-12;1.9e-08;3.6e-11	1	CANCHTRTTPEWRRGPSGNRDLCNSC	Type IVb
374	EnsemblFungi	Ascomycota	Dothideomycetes	Pleosporales	Stagonospora sp. SRC1lsM3a	Ssrc2	OAK97528	MGLSGLHPQQSQVDINGMPMMDMNMEMDMDMDMSLSLDGADASNAASFAAFTHPQMQPNVAASSTASDAGGYSMAQEISMSGAGAGPLPTGFGAPSMNPSGSTLTEFTKRRNWSQRVLEEMRDLLHILTPDGRILYMSPSCKALTGWDPSQLIGRFINEFIHPDDIGIFVKEFNESIASGNPLRFFYRFRKMDDSCIIFESHGHPHLSSDPSSFAPPTALNCRGFFLMARPYPTKNAALLDSFLEHKIENERLTKRIAELKREEQDENDEWTKKTEGASITETLPTQTMSQSDAASYAQMPPPAKPVISNTALTRQNLDEALAATKQDSINDKMARYEGANHLETIEMLTGLRYRDGERSQGISTGDASPNLIRGDAGIQISLDRDGRTSSDKKKKLKI…	468	51.19	5.635	60.79	-0.591	0(N)	Nucleus	2	PF08447;PF00320	PAS fold;GATA zinc finger	ILYMSPSCKALTGWDPSQLIGRFINEFIHPDDIGIFVKEFNESIASGNPLRFFYRFRKMDDSCIIFESHGHPHLS;CTDCGTLDSPEWRKGPNGPKTLCNACGLRWAKKEKK	134;405	208;440	4.2e-09;1.5e-11	1	CTDCGTLDSPEWRKGPNGPKTLCNAC	Type IVb
375	EnsemblFungi	Ascomycota	Dothideomycetes	Pleosporales	Stagonospora sp. SRC1lsM3a	Ssrc3	OAK98317	MDLSPNEDAARRGMLEDAMFPAFGNDAESASAQSPEQMQKNDPLGTQIWKLYSRAKTQLPNAERMENLTWRMMAMNMRRAELDRNKGNAQSSQGSDLMPPPNATSRPSAPRSAPSGIAQQLRKSSEQQLQAQVPQPQVQPDTMNLDDFIFPSSVGSPAGLSPEPSNDTPVPFHATAPVIPIRKPNQASDHDISLARASAPSVPPLINRENEFSYVPRHVRKTSIDERRPPKRRAEASPQVPPVNSIMIPTDAQAEADLNQYSLDHSMHPPTFPASQAQVPFSIDTFQMHEDPIVNSAGPFQQNFGFSPVGSPMMNHSASYSNMFNPNSMASSLNSTDYYSPPTSAFPSAVSTPQPIPEDNQMYFDRTGMDIRGPHGGSSYGPHRPSNLSSSMQPQFIFN…	844	90.455	7.809	47.61	-0.783	0(N)	Nucleus	2	PF08550;PF00320	Nitrogen regulatory protein areA, GATA-like domain;GATA zinc finger	IWKLYSRAKTQLPNAERMENLTWRMMAM;CTNCFTQTTPLWRRNPEGHPLCNACGLFLKLHGV	48;627	75;660	3e-09;6.5e-13	1	CTNCFTQTTPLWRRNPEGHPLCNAC	Type IVa
376	EnsemblFungi	Ascomycota	Dothideomycetes	Pleosporales	Stagonospora sp. SRC1lsM3a	Ssrc4	OAL02872	MTYATAAPATAGGQPGAPPVCQNCTTSTTPLWRRDESGSVLCNACGLFLKLHGRPRPISLKTDVIKSRNRVKTGGPGARRKAGETNGLPAAHPDADGSLGLAQHRRASGKISSGLSDRSQSPVSRTGTPNFLHPSNIAPQHMFEQALNGDPFHSPSLSAFGHRAPSPANSSVNGSHLEAPLPYDSLAAQNTALKTRVSEMELINDLFRNRVAELETSENAARETEKQLRAELEEVKQRESDLKRRLGELEDESPRHKKPRFSDISDLVDDTRAGSPINAMVD	282	30.3815	8.706	67.23	-0.7	0(N)	Nucleus	2	PF00320;PF25026	GATA zinc finger;Asd-4-like domain	CQNCTTSTTPLWRRDESGSVLCNACGLFLKLHGR;YDSLAAQNTALKTRVSEMELINDLFRNRVAELETSENAARETEKQLRAELEEVKQRESDLKRRLGELEDE	21;183	54;252	8e-12;2.4e-22	1	CQNCTTSTTPLWRRDESGSVLCNAC	Type IVa
377	EnsemblFungi	Ascomycota	Dothideomycetes	Pleosporales	Stagonospora sp. SRC1lsM3a	Ssrc5	OAL04041	MAHPSGSGGTSLAPTPTHPHHLSRETSKDELEMAESLRRLNQAHDHQGQRAATPSHLQQLAPAPVEARPEIYHSLEDAKPIVEAPLTPAASASSPLPSASSTGASAPVSGQICSNCKTTQTPLWRRSPTGETICNACGLYLKARNQHRPVNLKRNTASQSLLPVQQTPAPSQDDNDRTSPGNLAASPKVQTYVAADQMAAGTCPGGGRCNGTGGQQGCSGCPAFNNRVSKTAKYALAQANAASGPATTDTATGSSGTPGPPNGSNLIQACQNCGTTITPLWRRDDAGHVICNACGLYFKLHGTHRPVAMKKQEIKRRKRIVPANDTASQATPSIADYSPPPRPSQTPAFEHSVSPDPATAIESRETYTPEPKGPLAIDFTHYYGSTASVTSQPNHLQTL…	506	53.731	8.672	57.65	-0.771	0(N)	Nucleus	2	PF00320;PF00320	GATA zinc finger;GATA zinc finger	CSNCKTTQTPLWRRSPTGETICNACGLYLKARN;CQNCGTTITPLWRRDDAGHVICNACGLYFKLHGT	113;270	145;303	1.4e-10;2.5e-12	2	CSNCKTTQTPLWRRSPTGETICNAC;CQNCGTTITPLWRRDDAGHVICNAC	Type IVa;Type IVa
378	EnsemblFungi	Ascomycota	Dothideomycetes	Pleosporales	Stemphylium lycopersici str. CIDEFI 212	Slyc1	RAQ99518	MAHPSGNGGTSLAPTPTHPHHLSRETSKDELEMAESLRLLNQAHEHHKPRTETPSQEKQPIDPQDDQRSEIYHSLEDAMPIADGPATPSTSASLQIPSMNYEASNAPVTGQVCSNCKTTQTPLWRRSPSGETVCNACGLYMKARNQSRPVNLKRNTQTQPIMPAQQSPTPGPSDSSRTSPGNVATSPRVATYVAADQMAAGTCPGGGRCNGTGGQQGCSGCPAFNNRVSKTAKFALAQANAAPCENRSGNDAAASTASNSASTSAIPACQNCGTTITPLWRRDDAGHIICNACGLYYKLHGTHRPVAMKKQEIKRRKRVVPAGDTGSQAASSVANYSPPQRPSQTPAFEHSVSPDPSTALESREDYTPEPPRGPIAVDFTHYYSNLSATSNPANLVPNM…	502	53.7398	7.937	52.83	-0.843	0(N)	Nucleus	2	PF00320;PF00320	GATA zinc finger;GATA zinc finger	CSNCKTTQTPLWRRSPSGETVCNACGLYMKARN;CQNCGTTITPLWRRDDAGHIICNACGLYYKLHGT	113;269	145;302	1.7e-11;1.3e-12	2	CSNCKTTQTPLWRRSPSGETVCNAC;CQNCGTTITPLWRRDDAGHIICNAC	Type IVa;Type IVa
379	EnsemblFungi	Ascomycota	Dothideomycetes	Pleosporales	Stemphylium lycopersici str. CIDEFI 212	Slyc2	RAR01546	MDFAVPEGAMEVSSTEDSARRGMLQDAIFPAFGNDAGTPSAESPEQMQKNDPLGTQIWKLYSRAKMQLPNAERMENLTWRMMAMNMRRAEMDRNKGPAQDAQSSQMMPPPPAASARPPPRSAPSGIAQQLRKSQDQQAQVQQPQQDTMNLDDFIFPSSVGSPAGLSPELSNEDAAPFNATAPAIPIRKPHLAHDHNISLARASAPSVPPAIHREDDFGYVPRHVRKTSIDERRPPKRRAEASPLVPPVNSIMIPTDAQSEADLHQYSLDHNTMQPPTFPASQGQVPFSIDTFHMHEDPGVHSAGPYQQTFSGFSPVGSPLMSHSAFNSNMFNHNSMASSLNSTDYYSPPSSAFPSTVSTPQPIPEDSQMYFDRSGMDIRNSQHGASYGPHRPSNLSTSM…	1043	112.016	7.199	56.28	-0.62	0(N)	Cytoplasm|Nucleus	3	PF08550;PF00320;PF01965	Nitrogen regulatory protein areA, GATA-like domain;GATA zinc finger;DJ-1/PfpI family	IWKLYSRAKMQLPNAERMENLTWRMMAM;CTNCFTQTTPLWRRNPEGHPLCNACGLFLKLHGV;ACLLLRTYGSEEIEFVTPYDVLTRAGFEVKSAGVSLKNKAFAHMSRNIRIVPDYTELPSVPAQTAHEYFNILVLPGGGPGSKAFCESDEVLELIKNFQDAGKWVATICAATTALVASTKKFKGEKKRVTSHPSVSEEIKVAGWQYSEDRLVVDGKVITSRGPGTAMLFALTIVE	57;635;849	84;668;1022	5.6e-08;8.3e-13;7.3e-34	1	CTNCFTQTTPLWRRNPEGHPLCNAC	Type IVa
380	EnsemblFungi	Ascomycota	Dothideomycetes	Pleosporales	Stemphylium lycopersici str. CIDEFI 212	Slyc3	RAR03370	MDITKFVAGYRESASLLGDYNAYRDQLSRRLRIVNKKLGRATPKNAKYAAKAPVTAEDLHKNSEALHILLLNAERAWAQAMAMKASHSEDNADKSITGATRKHIVSRLHKAVQYANQAVELVSDTSASGASDADVLEARAYAYALAGAQEFEKQAEGVKSKNASPQRWSSCLINYSAARVIYSSLLKSTKNDLFKEVLAGTTDPSIRYAAYQSRIPRTVGVPTVATKYFPKDDAKLLQAVQKLDPAALEEEEAASSHSQITWRGRTANVVDAAIGQALASVDTASSVLDETTSSSTSPKDRANAYDDILIASQDAVDATRRAIEELEKEGVDEGDSRMQDLRVTNLAVNYHLISWRVGRNRVLVGKDDGLTFPANPPQKPRRQRKDGKEWVEREEPTGR…	1092	118.816	8.916	74.62	-0.554	0(N)	Cytoplasm|Nucleus	3	PF16969;PF00320;PF25026	RNA-binding signal recognition particle 68;GATA zinc finger;Asd-4-like domain	LGDYNAYRDQLSRRLRIVNKKLGRATPKNAKYAAKAPVTAEDLHKNSEALHILLLNAERAWAQAMAMKASHSEDNADKSITGATRKHIVSRLHKAVQYANQAVELVSDTSASGASDADVLEARAYAYALAGAQEFEKQAEGVKSKNASPQRWSSCLINYSAARVIYSSLLKSTKNDLFKEVLAGTTDPSIRYAAYQSRIPRTVGVPTVATKYFPKDDAKLLQAVQKLDPAALEEEEAASSHSQITWRGRTANVVDAAIGQALASVDTASSVLDETTSSSTSPKDRANAYDDILIASQDAVDATRRAIEELEKEGVDEGDSRMQDLRVTNLAVNYHLISWRVGRNRVLVGKDDGLTFPANPPQKPRRQRKDGKEWVEREEPTGRKLARLRERTALYDAIL…	17;834;996	586;867;1065	1.1e-195;2.2e-11;3.3e-21	1	CQNCSTSTTPLWRRDESGAVLCNAC	Type IVa
381	EnsemblFungi	Ascomycota	Dothideomycetes	Pleosporales	Stemphylium lycopersici str. CIDEFI 212	Slyc4	RAR03493	MDSEMQMTGAGAGPLPTGFGAPNMNPSGSTLTEFTKRRNWSQRVLEELRDLLHILTPDGRILYVSPSCKPLTGWEPSHVMGRFINEFIHPDDIGIFVKEFNESIASGNPLRFFYRFRKTDDTWLIFESHGHPHLSTDTNAFAPPNSINCRGFFMMARPYPTKNAALLDSFLEHKIENERLMKRIAELKREEQDEQDDWTRKTEGAATSMTPSESQATQNMSQADAASYAQMPPPAKPAMSNTALTRQNLDEALAASRPDSINDKMARYEGANHLETIEMLTGLRYRDGERSQGISTGDASPNLIRGDAGIQISLDRDGRNSADKTKKKLKIADEYVCTDCGTLDSPEWRKGPNGPKTLCNACGLRWAKKEKKKQAGPTSNMPSSTGMMHTPAMPMHSST…	402	44.6217	6.573	57.41	-0.725	0(N)	Nucleus	2	PF08447;PF00320	PAS fold;GATA zinc finger	ILYVSPSCKPLTGWEPSHVMGRFINEFIHPDDIGIFVKEFNESIASGNPLRFFYRFRKTDDTWLIFESHGHPHLST;CTDCGTLDSPEWRKGPNGPKTLCNACGLRWAKKEKK	61;337	136;372	3e-09;1.2e-11	1	CTDCGTLDSPEWRKGPNGPKTLCNAC	Type IVb
382	EnsemblFungi	Ascomycota	Dothideomycetes	Pleosporales	Stemphylium lycopersici str. CIDEFI 212	Slyc5	RAR04680	MNGYPYPTRPFSQANNGPMMMNMNGDAINGFDMGEGQSLDSMVAQNNKDNRRRSMPVYARGPQQLNLASPDTRRLSMMNFGDPNSADMDEFQFNMHSGTMDNMMHANNAFPRTTGDMQNDQLPAADLAINTQFQGQASPFPQMRGPGSAYASPMHQKNSLDLDMSSYQNGMNMSLDMDDSLNMMPSEMNMFSGNQFHSPMLGSPITQEFVPSVPAPPQDNNTPSGQSQDQLKRPSLSNTPEVKSGRSSFLSCAAGQDQISMRSNSRVQNDSHSSNSVPTRMTLASLQNQQPIGQDPAQDLPKEVLNKHLQNYKIPWSTPAGGFPSTMHQNPHQKTQFKNAYSSTGFDMLGVLMRVASRPDPQIDIGSVDLSCAFVVCDAELDDIPIVYCSENFERLTGY…	982	109.395	8.517	61.26	-0.681	0(N)	Nucleus	3	PF13426;PF08447;PF00320	PAS domain;PAS fold;GATA zinc finger	AFVVCDAELDDIPIVYCSENFERLTGYTRHMILGRNCRFLQAPDGKVESGIKRNYVDDDSVYYLKSTIESREEAQISLINYRRGGQPFMNLLTMIPIAWEPGGKIKFFVGFQVDL;LYLSPASNRILEYDPSELVGTALSSVCHPSDIVPVTRELKETTSGASVNVVFRIRRKKSGYMWFEGHGSLHTEQGK;CANCHTRQTPEWRRGPSGKRDLCNSCGLRWAKQ	373;580;935	487;655;967	3e-12;1.9e-07;4.4e-11	1	CANCHTRQTPEWRRGPSGKRDLCNSC	Type IVb
383	EnsemblFungi	Ascomycota	Dothideomycetes	Pleosporales	Stemphylium lycopersici str. CIDEFI 212	Slyc6	RAR04993	MEPIDAGSRQAATGLPSINHMDADRVKREEVEYQRKHSAAPMPSPLHPYAGSSHLHSNHQSSVASTVPGSLGGLLSPPESRRTSGDERETQRATARQSLPSIHEALGGSEQPLSYPATVPPPSSITSAPQHYHPSSAAPSPAEQRPRQYPPDLQHAGQGPSNPFSHPRSPYLASSAPQAGPPPPPAPVHTESLPRPPFSDPRPPYSTPQHNPKLPSLHPIKTAQSPPPSATRPNPPYSSYPPPASNYESSAPQSAGPMNHQQHYPHYPPSYPSSAPSASTPNSAYPSSASTYSAPPRYAPQSWQDNSEMARLEEKKIGRSSLAPYGESVKRHLESFDIDASLNEMADGSGRISEFSKIYRQRAHENQRIGMTPQSMPRLEEVDEMLKQAERIQMSLQRM…	1195	133.042	6.521	64.98	-0.681	0(N)	Cytoplasm	3	PF00320;PF03074;PF03074	GATA zinc finger;Glutamate-cysteine ligase;Glutamate-cysteine ligase	CHSCNRAETPEWRRGPDGARTLCNACGLHYAKL;IHMDAMAFGMGSCCLQITFQAKNIGEGRKMYDQLSPIAPILLALTAATPIYKGFLANTDVRWNQISRAVDDRTPEELD;PRLRPEYLDPDLIIDANIKKRLVEGGMDDLLATHFAHLFIRDPIVVFAEDLEELDLTKADHFENLQSTNWQHMRFKPPPAGSDMGWRVEFRPMEIQITDFENAAFSIFIVLLTRAILSFNLNFYIPITLVSENMETAHIRDAVSTQKFWFRKDPFSTHKPSNGTGTSTPTENGSRTATPTGPVEDEYEQMTINEVINGQQTLYGNAGFPGLIPLVESYLNSMNVDVETRCDLATYLDLIRKRANGTYWTAAKWIRNFVQSHPEYKKDSVVSDEITYDLVKAAEQI	462;815;893	494;892;1177	5.2e-10;6.2e-37;7.6e-114	1	CHSCNRAETPEWRRGPDGARTLCNAC	Type IVb
384	EnsemblFungi	Ascomycota	Dothideomycetes	Pleosporales	Trematosphaeria pertusa str. CBS 122368	Tper1	KAF2240987	MVGSSGSGGTSLAPTPTHPHQLSREPSKEDVEMAEQLSQLNQAHESNTPRIASPPQSQQPATPQPAPSSEIYHSLEDTLAVRKSEQPEQAPTPATTASLPPKSVHGGNAPITGQVCSNCGTTRTPLWRRSPAGETICNACGLYLKARNQSRPTNLKRNISAHPTASVQQSPAPGQSHDRGASPGNAAVSPRAATYVAADHAAAGTCPGGGRCNGMGGQQGCNGCPAFNNRVSKTAQFALAQANTTSTPTDATRTEGAGQPTATSVIPACQNCGTTVTPLWRRDEAGHTICNACGLYYKLHGSHRPVEMKKQEIKRRKRIVPAEPGTVVPQAPPSMASNSPPQRATQTPVLEQSASPASTTAIETSEVAYPPYPRAPPPVDFTSYYSNGPITSHPARTLT…	504	53.1634	8.983	54.37	-0.75	0(N)	Nucleus	2	PF00320;PF00320	GATA zinc finger;GATA zinc finger	CSNCGTTRTPLWRRSPAGETICNACGLYLKARN;CQNCGTTVTPLWRRDEAGHTICNACGLYYKLHGS	116;269	148;302	1.3e-10;3.3e-12	2	CSNCGTTRTPLWRRSPAGETICNAC;CQNCGTTVTPLWRRDEAGHTICNAC	Type IVa;Type IVa
385	EnsemblFungi	Ascomycota	Dothideomycetes	Pleosporales	Trematosphaeria pertusa str. CBS 122368	Tper2	KAF2245743	MPPKRASPPPSKPSNGHSMTYATAAPATSGGQANSPPVCQNCTTSTTPLWRRDESGSVLCNACGLFLKLHGRPRPISLKTDVIKSRNRVKTGAPGGRKKAADANGLPAAHPDADGSLGLAQHRRASGKISSGLSDRSQSPISRTGTPGLSHPSNIAPQHMFESALHGEFHSPSLPNFALRQPSPSAASSVNGSHLEPPLPYDTLAAQNTALKTRVSELEVINDLFRGRVGELESSEQAARETESRLRVELEEVKQREADLKRRLEELEGEGPKHKKMRLSDLVDESRAGTPISSMAE	297	31.7462	9.36	66.46	-0.704	0(N)	Nucleus	2	PF00320;PF25026	GATA zinc finger;Asd-4-like domain	CQNCTTSTTPLWRRDESGSVLCNACGLFLKLHGR;YDTLAAQNTALKTRVSELEVINDLFRGRVGELESSEQAARETESRLRVELEEVKQREADLKRRLEELEGE	39;201	72;270	8.6e-12;1e-23	1	CQNCTTSTTPLWRRDESGSVLCNAC	Type IVa
386	EnsemblFungi	Ascomycota	Dothideomycetes	Pleosporales	Trematosphaeria pertusa str. CBS 122368	Tper3	KAF2246648	MYQNGGSLPAEMAGLAPMPALPRLPTDQSDLAMGLEDMMPMDMDLSQLDDGQPPAAQPAAFTPFTQQLQPSVPASSASSDAFTLTQDNTMTGAGAGPLPTGFGAPSLNTSGSTLTEFTKRRNWSQRVLEELRDFLHILTPDGRILYVSPSCKALTGWDQPQLIGRFIGEFIHPDDRGIFVKEFHESIASGNPLRFFYRFRKMDESWAIFEAHGHPHLSNDPSTFAPPNTMNCRGFFMMARPYPTKNAALLDSFLEHKIENERLMKRIAELKREEHEEQEAADRHWQKKTDGVSSVAPSETQGHTESDSAVAAYNAMPPPAKPGVSNAALTRQNLDEALAASKPDSINDKMARYEGATHLETIEMLTGLRYRDGERSQGISTGEHSPMLIRGDAGIQISL…	482	52.9658	5.853	61.08	-0.65	0(N)	Nucleus	2	PF08447;PF00320	PAS fold;GATA zinc finger	ILYVSPSCKALTGWDQPQLIGRFIGEFIHPDDRGIFVKEFHESIASGNPLRFFYRFRKMDESWAIFEAHGHPHL;CTDCGTLDSPEWRKGPNGPKTLCNACGLRWAKKEKK	144;421	217;456	3.9e-09;1.5e-11	1	CTDCGTLDSPEWRKGPNGPKTLCNAC	Type IVb
387	EnsemblFungi	Ascomycota	Dothideomycetes	Pleosporales	Trematosphaeria pertusa str. CBS 122368	Tper4	KAF2250866	METLDAASRQRSVVCPRRGSVAPLYGCSYADLRGSVGLPSISNLDSDRIKREEVEYQRKHSAPAMVSPLHPFAAPSLSHGNHQSSPASAVPGPLGGLLSPPESRRTSGDEKEQQRAPARQSLPSIHEALRSDQSLGAFSAPAPPPSAPASAPQSYFPPSTASPSDPRTRAFPSDLHGSQGPPNPFSHPRSPFMNTSASAAPPPPPPQAHSDSLPRPSFAEPRSSFSEPRSSFSAPQHNPKLPTLHPLRTNQSPPPGPGRPGLPYSTYPPQPSSAYETSAPHSAGPMNPNYGYPQYPSNYPLSAPAPGGPNSAYPSSTSTYSAPPRGYPGPAWPDRGLEEKKINRSNLAPYGESVKRHLESFDLEASLNEMAEGAGRITDFSKVYRQRAHENQRIGMTPQ…	546	58.9707	9.411	46.06	-0.934	0(N)	Nucleus	1	PF00320	GATA zinc finger	CHSCNRAETPEWRRGPDGARTLCNACGLHYAKL	487	519	2.1e-10	1	CHSCNRAETPEWRRGPDGARTLCNAC	Type IVb
388	EnsemblFungi	Ascomycota	Dothideomycetes	Pleosporales	Trematosphaeria pertusa str. CBS 122368	Tper5	KAF2252561	MNGYPYPQRPFQPANNGHSMMDLSADGISAFDLVDGQSLDDIVSQNEKASRRRSMPVYGGAQMAMGSPDSRRLSMMNFGDPGSNDMDDFRFDLSAGTGMDGVMRSGTFPRTTADMQNDRIPPRDLAINTQFPNQNPAFSNMADPASSYASPLHPNASLDMDMTTPYPNAMSMSMDMNDSLNMIPTDMNLFSNAQFATPMMDSPVNQDFVSPPPPPDPSPSMQPPDQFRSASSSTTPDVRSGVPTRAGSQEQSSVRSNSRPKSENQTSSNSVPTQMSSASLKAQEPIALPTGQNIAPEAFSPIKFPWTTPPGGFPSTMHSNPHVNTQFKNAYSSTGFDMLGVLMRVATRPNPQIDIGSVDLSCAFVVCDAEMDDVPIVYCSENFERLTGYSKHMILGRNC…	1046	115.403	8.727	59.57	-0.666	0(N)	Nucleus	3	PF13426;PF08447;PF00320	PAS domain;PAS fold;GATA zinc finger	AFVVCDAEMDDVPIVYCSENFERLTGYSKHMILGRNCRFLQSPDGKVEPGIKRRYVDDDSVLYLKNMIKTRQEAQISLINYRRGGQPFMNLLTMIPISWEPNGNIKFFVGFQVDL;LYLSPSSNRILEYDPSELVGTALSSVCHPSDIVPVTRELKETGNGSSVNVVFRIRRKKSGYMWFEGHGSLHTEQGK;CANCHTRTTPEWRRGPSGNRDLCNSCGLRWAKQ	363;568;919	477;643;951	3.6e-13;3.4e-07;3.5e-11	1	CANCHTRTTPEWRRGPSGNRDLCNSC	Type IVb
389	EnsemblFungi	Ascomycota	Dothideomycetes	Pleosporales	Trematosphaeria pertusa str. CBS 122368	Tper6	KAF2257222	MCCKSATWWLDWGKDGMGSDPHAIRIASALRRPTLSSQAFSNERCKNRSFSASERERESMCIDRVDLVQIVYPSPERSALLEDETTQHETTADRCSNSYETRQSDRDHEASDVAFVLFGTTGDTSPFKQQRGTIEQRGQGQDHSTEYGSDGDLKRIVVTSEMRAQNFQIHVPATPRGWCSASNSSGASWTLRWRCREMASVLFRRSQSPRRWLQLHPHFSPTLLPRAKTPSEASFQGSKLIERCTDQASSNLTGRRGSVQLKRASIFPLSLSFLLDDLNGQCCCSALLHGQKPQAPQPERNARCRVRARLSFARGRPSGLRPGARRAHVDALHAQGSRPLGSASWTARDATGRLIRPCSAAPPLKVNAPTHDLTTPAAPPSRIPGPRPAAGSVTTAAVA…	1375	147.732	9.614	56.26	-0.693	0(N)	Cytoplasm|Nucleus	2	PF08550;PF00320	Nitrogen regulatory protein areA, GATA-like domain;GATA zinc finger	IWKLYSKAKTQLPNAERMENLTWRMMAM;CTNCFTQTTPLWRRNPEGHPLCNACGLFLKLHGV	581;1151	608;1184	1.6e-09;1.1e-12	1	CTNCFTQTTPLWRRNPEGHPLCNAC	Type IVa
390	EnsemblFungi	Ascomycota	Dothideomycetes	Pleosporales	Westerdykella ornata str. CBS 379.55	Worn1	KAF2272445	MNGYPTYAQPPLFPQPSNSSHLSSDLPPTSAGLDGVNANMGMDMHTNTDTAMGMGMGFGGMQHQQQQPQQQQQQQRTGRPAQSSTDDGDKVDRRKSLPAYANMAMHMDNSDSRRFSLLNFGGDANNAVNLDAFSFNDQTAMMQPPPSFSQPASAPAFSINAQFAAQNQPLASLQTPASAFSSPQYPIDSLSIGTNPSFVPDFSMSMDLQMENDALFQDLSLTTPLMDSTLLDQEFMDPGSATLPLTTGPQPLGSYANSSLPNTADINSSLPNGTNSGQQTQPNGQVITPTRFHDHSGHVSPFGSGQERPIAPAQDVPVADFAQMSLPWTAPPGGFPSTMNNNPHMSTQQFQNAYSKTGFDMLGILSRVATRPNPQIDLGQVDLSCAFVVCDAQAEDCPI…	993	108.422	7.881	66.22	-0.493	0(N)	Nucleus	2	PF13426;PF00320	PAS domain;GATA zinc finger	FVVCDAQAEDCPIVYCSDNFGNLTGYNLDEIRGQNCRFLQSPEGKVEQGTRRKYCDDRSVRALREAVDNFREAQVSLINYRKGGQPFMNLLTMIPISWEVGGPVRYFVGFQVDL;CANCHTTVSPEWRRGPSGNRDLCNSCGLRYAKQ	387;937	500;969	3.6e-14;3.4e-11	1	CANCHTTVSPEWRRGPSGNRDLCNSC	Type IVb
391	EnsemblFungi	Ascomycota	Dothideomycetes	Pleosporales	Westerdykella ornata str. CBS 379.55	Worn2	KAF2272896	MSGAQHTYPFDGRGGDRFDAFFGLPADPSTSPSRPRLTGLSPPAFPDYSSTVTSAAHSLSSDSTLGTNLDSPTRTPAARPSMLQKPIFPILENAAGGATADNVEEMQSNDPLATQIWKLYSKQKSQLPNAERMENLTWRMMAMKMRERNKGQAQNSEMRPPSSTPRTTFTTPPKSAPSGIAQLRKSVDQQAQTTRQPDAMNLDDFIFPSSVASPAGLPPSPSNEVTPAASNATAPAIPIRKPNHSHDHDFSLAHASAPPVPPVQREQEFGYVQRHVRKTSIDERRPPKRRAETSPQVPAVNSIMIPTDPESEAALHSYSLDQSMPPPNFQNSQPQVPYTIDTFQLNEDAAITSAGPFQQDFGFSPVGSPLINQSHGFSSMYNPNSIASSLNSTDFYSPP…	912	97.4756	8.805	50.48	-0.732	0(N)	Nucleus	2	PF08550;PF00320	Nitrogen regulatory protein areA, GATA-like domain;GATA zinc finger	IWKLYSKQKSQLPNAERMENLTWRMMAM;CTNCFTQTTPLWRRNPEGAPLCNACGLFLKLHGV	116;686	143;719	7e-10;5.6e-13	1	CTNCFTQTTPLWRRNPEGAPLCNAC	Type IVa
392	EnsemblFungi	Ascomycota	Dothideomycetes	Pleosporales	Westerdykella ornata str. CBS 379.55	Worn3	KAF2273053	MASHSGSGGISLAPTPTHPHIMSREPSKEDIELARNLSLLNNPQDQRTSRSEPMEQQHGQQKPAQEQGSEIYHSLEDAVPLEKGSQPEQHATPVSTATIAHRPATGAAGPFTQVCSNCGTTRTPLWRRSPTGETICNACGLYQKARNQARPVNMKRVAQPSPAVAPLPSPAPDHSDRSVSPAGQVGGSARGATYVAADQDSSGTCPGGGRCNGTGGQLCCNGCPAYNNRVSKTAQFGGVGEAHGHAASGRGATAATGTSVVPACQNCGTTVTPLWRRDEEGRTICNACGLYHKLHGRPRPVLMKKQEIKRRKRVAPAGPEHASPPTTPAAGHPAPAWSQQPVSPAPSSVLPSREHPAESQAIRAPPAIDFTNFYKNASAAPVPQGPPTPPSGPQGVSRK…	490	51.7712	9.033	55.69	-0.757	0(N)	Nucleus	2	PF00320;PF00320	GATA zinc finger;GATA zinc finger	CSNCGTTRTPLWRRSPTGETICNACGLYQKARN;CQNCGTTVTPLWRRDEEGRTICNACGLYHKLHGR	115;264	147;297	8.2e-11;1.6e-11	2	CSNCGTTRTPLWRRSPTGETICNAC;CQNCGTTVTPLWRRDEEGRTICNAC	Type IVa;Type IVa
393	EnsemblFungi	Ascomycota	Dothideomycetes	Pleosporales	Westerdykella ornata str. CBS 379.55	Worn4	KAF2277892	MDSLTSVPQTQAPPNLGAIADRPPDGVVPPFTAEMDLGIESGHNNTGPVSGAQASFPLYASNPPMSTLPYDMTAMTSSAGAPSGVPFTLGPDTGLQGIRAEPHTSNPRSSTVMLSEFTKRRHWQRDVLQEMRDLLHVLKPDGEILYVSPSCKTLTGWEDSQLVGRIVNDFIHPDDAALYVQEFTDAKKSGNPLRFFYRFKKADESWAIFELHGHPLLTTNPTAPFGQQPALRCTGFFMMSRPYPTKNAELLDSFLEHKIENERLLRRIAELKKEEQEELEAEDSQWRSQADTYSSLAPSEPHESTATPAHNAMPPPAKPAMSNTALTRQNLDEASVTSKPDSIDDKMARYEGTSHIETIEMLTGLHYGDGERSKGISTGAASPVLIRGDVGIQYSVDRD…	486	53.6274	6.107	61.28	-0.754	0(N)	Nucleus	2	PF08447;PF00320	PAS fold;GATA zinc finger	ILYVSPSCKTLTGWEDSQLVGRIVNDFIHPDDAALYVQEFTDAKKSGNPLRFFYRFKKADESWAIFELHGHPL;CRECGVLQSPEWRKGPSGPKTLCNACGLRWSKEKK	144;418	216;452	6.9e-08;5.6e-10	1	CRECGVLQSPEWRKGPSGPKTLCNAC	Type IVb
394	EnsemblFungi	Ascomycota	Dothideomycetes	Pleosporales	Westerdykella ornata str. CBS 379.55	Worn5	KAF2278784	MATLSGTSRPSIGLPPIHPLDQDKVHVKREEAEYARRKSTLSMASPSHPFPGPLHSYSNHQSSGASSLPGPSGGLLSPPGSRRTSKEDNKDQRPPARQSLPSIHEALGAEPPSTLSSLAFPPPPPSAPVSAPQSLFPPPSTASAADQRARTFSVDHIKNQAAQQPSAASRTPFLKQRNSSEHPPLPPQARQTDSPRSTLSSVHTHKIPALHPLNTGRSDSISTTQPNQPHSSFPLQSSTPYQTSAPPSAGSMNTQYGYHQYAPGYPLSAPAQTVPNSAYPPSASTYSAPPRYPPPPWHNGATQHTPLDEKESSSHLPYGESVKRHLETFDLEASLNQMAEGAGRIADFSKDYRQRAHSNVRSGTLSQIVPGLEEVDEMLKQSEKIQMSLQRMRGIVLSH…	512	55.5649	9.403	52.73	-0.902	0(N)	Nucleus	1	PF00320	GATA zinc finger	CHSCNRAETPEWRRGPDGARTLCNACGLHWAKLN	455	488	3e-10	1	CHSCNRAETPEWRRGPDGARTLCNAC	Type IVb
395	EnsemblFungi	Ascomycota	Dothideomycetes	Pleosporales	Westerdykella ornata str. CBS 379.55	Worn6	KAF2279165	MASPPLPPPASNPPKALSMTYATAALATAGGQPNSPPVCQNCATSTTPLWRRDESGSVLCNACGLFLKLHGRPRPISLKTDVIKSRNRVKTGGAGSRKKAGETNGLPAAHPASHHPDPDPSLAVGLVQRRRTSGKISSGLSERSQSPISRTGTPSFAHQSNIAPQHMFDGALHPDAFHSPSLPSAFPLRQPSPSAASSVNGSHLDPPLAYDALMSQNTHLKTRVNELEVINELFRGRVSELENSESRLKAELDEMRQREADLKRKLDEFEAEGPRHKKMRLSDLVDESRAGTPISSMGE	299	32.1158	9.384	67.32	-0.635	0(N)	Nucleus	2	PF00320;PF25026	GATA zinc finger;Asd-4-like domain	CQNCATSTTPLWRRDESGSVLCNACGLFLKLHGR;YDALMSQNTHLKTRVNELEVINELFRGRVSELENSESRLKAELDEMRQREADLKRKLDEFEAEG	39;210	72;273	4.6e-12;6.6e-17	1	CQNCATSTTPLWRRDESGSVLCNAC	Type IVa
396	EnsemblFungi	Ascomycota	Dothideomycetes	Trypetheliales	Viridothelium virens str. Tuck. ex Michener	Vvir1	KAF2231709	MASVNVLSTPAVPTPSYPYSCPSAPYSQTPSMSTSSATGLPGMKSSPTSRWSPKDEQDQKPAPRQSLPSIHEALGADQPLQYSAPPPPAPTSAPQSYQSQPLPSPSEHARRSYISEHSQQSSQYSQHPPRSPTIDRPRSVTGHQHGGPVEAQRSSYPTQPNSKLPTLHPLQTTRSPQMPSAPPPQSGSYAPYTQHSSPAYTSAHPPTPPSSHQPQFPYGYARPPQYNYPAGTPTSAYPPHQSSTYSASDRYQPPWKNDGSDVLSRAEESKRAGSIRGPAFGESVKRHLEFFDFEASLNEIAEHSAILQDFARTYQQRAHQTQRSGPVAGSLPEIPMIEDMQRRSSKFNEALARIKDVVITQQTALAQQVQARQYNDANEYEHADQNGVGDDLKHQGFAG…	475	51.7533	9.32	43.68	-1.015	0(N)	Nucleus	1	PF00320	GATA zinc finger	CHSCNRAETPEWRRGPDGARTLCNACGLHYAKL	415	447	1.7e-10	1	CHSCNRAETPEWRRGPDGARTLCNAC	Type IVb
397	EnsemblFungi	Ascomycota	Dothideomycetes	Trypetheliales	Viridothelium virens str. Tuck. ex Michener	Vvir2	KAF2233828	MSGMLEQDPNMLNGLNMGDMMAMDLDFSLPPGADATSFPPATSQQTQPSIEPSEAAYGLQQQDSGAMNAAGAGPLPTGFGIQPNQSSGSTLTEFTKRRNWSQRVLEELKDFLHILTPDGRILYVSPSCKFLTGHDPSQIQGKFIGEFIHPDDSGIFVREFNESIASGNPLRFFYRFRKADDTYTIFESHGHPHLSSEAIQFGPSPNSAGFCRGFFLMARPYPTKNAALLDSFLEHKIENERLTKRISELKREEAEETEAQERYWKQRTEGQQSSMTPSESPVDGTLRLGSVENGQNPVTLGDGTNQSSVTPSASAYGGMPPPAKPGAASNALTRQNLDEALAASKPDSINDKMARYEGATHIETIEMLTGLRYRDGERSQGISTGDTSPALIKGDAGIV…	494	53.1877	5.623	61.32	-0.629	0(N)	Nucleus	2	PF08447;PF00320	PAS fold;GATA zinc finger	ILYVSPSCKFLTGHDPSQIQGKFIGEFIHPDDSGIFVREFNESIASGNPLRFFYRFRKADDTYTIFESHGHPH;CTDCGTLDSPEWRKGPAGPKTLCNACGLRWAKKEKK	121;427	193;462	1e-08;3.7e-11	1	CTDCGTLDSPEWRKGPAGPKTLCNAC	Type IVb
398	EnsemblFungi	Ascomycota	Dothideomycetes	Trypetheliales	Viridothelium virens str. Tuck. ex Michener	Vvir3	KAF2237429	MLGGQSLDDIVNQNSKEMRRSSVPVHYGGNQSNMSPDIRRLSMMEFSGASPGGPFDGFQFDPSTTVTDGAMPARTSNPNATAPLNSRRQSTSNVALNDQFTGQTSPYMQNPGSAYQSPMHPSTGLDMGMADSFISPGLNMQSDYSNMNTMMSGGMTPMDAYQSDQFTSMGASPMPPKVTGPTQPSLPKDTSGGGTPSTSREQRGSKDNQSSTEVVHDPSRSQSFDLARTNSVQSTPQPQSQNQVSSQILANHQHQQPQNRQNPQTANIASLGKFPWADPPDGWPSTMHGRPHMNSQYKNAYSSTGFDMLGVLMRVATRPNPEINIGSVDLSCAFVVCDAEMDDFPIVYCSDNFERLTGYNKHMILGRNCRFLQSPDGNVQTGIKRKYVDDDSVLYLKNM…	1021	111.93	8.847	64.65	-0.64	0(N)	Nucleus	3	PF13426;PF08447;PF00320	PAS domain;PAS fold;GATA zinc finger	EMDDFPIVYCSDNFERLTGYNKHMILGRNCRFLQSPDGNVQTGIKRKYVDDDSVLYLKNMINLRKEAQISIINYRRGGQPFMNLLTMIPIAWDTDNVKFFVGFQVDL;LYLSPSSSRILEYEAHELVGTALSSVCHPSDIVPVTRELKDTSSGASVNVVFRIRRKHSGYMWFEGHGSLHTEQGK;CANCHTRVTPEWRRGPSGNRDLCNSCGLRWAK	340;539;886	446;614;917	1.2e-13;3e-07;2.9e-10	1	CANCHTRVTPEWRRGPSGNRDLCNSC	Type IVb
399	EnsemblFungi	Ascomycota	Dothideomycetes	Trypetheliales	Viridothelium virens str. Tuck. ex Michener	Vvir4	KAF2237792	MDVGASTLSQELEAVIIGPDSLPLHSSSSPRHVRKPAGHYDYSSGSSSAIQSLTSASTLESKLDFSSTTDTATRTGVLDESVFPIWKDDTGGLEPESPEAMQKEDPLATQIWRLYSRTRSQLPNRERMENLTWRMMAMQLKKTRNQEPKGSTLSSHPQPRPKPSTAPSGIAQLRKSADQNAGSQPEPMNLDDFIFPSNIASPAGLSPSPAHESLPNPITTASAIPIKKQREIRDQDLQLSRASAPSMPPTDNRGKNEFGYVQKHVRKTSIDERRPPKRRAENSPHVPAVNNITIPHDPDSDAALNSYSLDHSSQPPMFATGAQNHNPIPFNLNTYNLDNDPILHSAGPFQQSFSFSPVPSPIATTGNYPSMYHPAPMNSSLTSTDYYSPPGSGRPSTVS…	990	102.987	8.87	51.06	-0.649	0(N)	Nucleus	2	PF08550;PF00320	Nitrogen regulatory protein areA, GATA-like domain;GATA zinc finger	IWRLYSRTRSQLPNRERMENLTWRMMAM;CTNCFTQTTPLWRRNPEGHPLCNACGLFLKLHGV	111;681	138;714	6.1e-08;7.8e-13	1	CTNCFTQTTPLWRRNPEGHPLCNAC	Type IVa
400	EnsemblFungi	Ascomycota	Dothideomycetes	Trypetheliales	Viridothelium virens str. Tuck. ex Michener	Vvir5	KAF2239827	MTFSTSVPATAASGQGSSPPVCQNCATSTTPLWRRDELGSVLCNACGLFLKLHGRPRPISLKTDVIKSRNRVKTGQGPKKRTSFEANGGLPATAAPPSTSLSFNPQLQQPSQPPQLPAERSRSATPHQQNPNIAPQHLFDQVTIFDGAPHPSSHSPSLPHFSLRHPSPVPSHLSASSSQLNGAGGHLEPPQTYDAIVALNTSLKTRVSELEVINDLFRGRVAELEKSEQDARDAEEVMRGELEGLRQEVEEARQREETLKKKVEGVDTPEQDVMLNGLVDEIDVDGKRVKRRRVSETETEN	301	32.8052	6.519	70.3	-0.706	0(N)	Nucleus	2	PF00320;PF25026	GATA zinc finger;Asd-4-like domain	CQNCATSTTPLWRRDELGSVLCNACGLFLKLHGR;QTYDAIVALNTSLKTRVSELEVINDLFRGRVAELEKSEQDARDAEEVMRGELEGLRQEVEEARQREETLKKKVEGV	22;191	55;266	2.6e-11;8.7e-25	1	CQNCATSTTPLWRRDELGSVLCNAC	Type IVa
401	EnsemblFungi	Ascomycota	Dothideomycetes	Trypetheliales	Viridothelium virens str. Tuck. ex Michener	Vvir6	KAF2240107	SNCATTRTPLWRRSPAGATICNACGLYLKARNQDRPTNLKPFQALSAISSNATNVVVACQNCGTTVTPLWRRDESGHTICNACGLYHKLHGRHRPVGMKKGEIKRRKRV	109	12.0588	10.502	68.07	-0.567	0(N)	Nucleus	2	PF00320;PF00320	GATA zinc finger;GATA zinc finger	SNCATTRTPLWRRSPAGATICNACGLYLKARN;CQNCGTTVTPLWRRDESGHTICNACGLYHKLHGR	1;59	32;92	4.6e-10;1.7e-12	2	SNCATTRTPLWRRSPAGATICNAC;CQNCGTTVTPLWRRDESGHTICNAC	Type IVp;Type IVa
402	EnsemblFungi	Ascomycota	Eurotiomycetes	Chaetothyriales	Capronia coronata CBS 617.96	Ccoro1	EXJ78435	MAASLTGTDHNLPFSQPVCQNCQTSTTPLWRRDESGSVLCNACGLFLKLHGRPRPISLKTDVIKSRNRVKTSNQGPKKKVSVADSNDARIPLPDQGLSAQLEQNGNSTGQAEMATPPHGANAHRRVSQMATSVASDRSHSPVSRTGTPGVTHDPNIAPQHVFDGASSHLPEHHFANGSPSLPPLNQPSPNTNSVVNDRHTELPMSYEQLVTANANLRTRVSELEVISMVYSDNENNIRKERDRAVRERDELKRKVEQLERKLQDIREAKEEPPSKKQRLSDQS	283	31.2454	9.095	66.15	-0.896	0(N)	Nucleus	1	PF00320	GATA zinc finger	CQNCQTSTTPLWRRDESGSVLCNACGLFLKLHGR	19	52	2.4e-12	1	CQNCQTSTTPLWRRDESGSVLCNAC	Type IVa
403	EnsemblFungi	Ascomycota	Eurotiomycetes	Chaetothyriales	Capronia coronata CBS 617.96	Ccoro2	EXJ80302	MSSADYEERGGTAASRATSAFHSDADLSHFFAPQPSSSLDDTDSSTWSSLGGALTGNTSADLSPTNYSSTATFNLNTTHSNKFTSTNLDLATSQSLTRDESLLRDDVFPEWKTEAHSTDVESPEELQKKDPLGTQIWKLYSRTKSRLPNQERMENLTWRMMAMNLRRREQMQAAYANNTHSGSDNRMAGTDAFFSAKQAQPKPTPQTSAPSGIAQQLRKSIDNSAEQSAQPSQHEYEQEHEHEHMHPSDPMNLDDFIVPSSVASPSGITSPDSSGQQDQRQEQAGGIPIATRKKPQVEIPQGLPAASMPQTSVPIHRSSEFDYVPKRVRKTSIDERRGNRKRPAEFSPQVPPLIVPNGTGHSEMDHAVPDYALDQHTSPQYTGQANFQGQMALHLDSVH…	975	104.928	6.156	48.59	-0.781	0(N)	Nucleus	2	PF08550;PF00320	Nitrogen regulatory protein areA, GATA-like domain;GATA zinc finger	IWKLYSRTKSRLPNQERMENLTWRMMAM;CTNCFTQTTPLWRRNPEGHPLCNACGLFLKLHGV	136;719	163;752	1.2e-08;7.6e-13	1	CTNCFTQTTPLWRRNPEGHPLCNAC	Type IVa
404	EnsemblFungi	Ascomycota	Eurotiomycetes	Chaetothyriales	Capronia coronata CBS 617.96	Ccoro3	EXJ83480	MGTFQHNQTSVMGSSFDLQQGMFDASMVNGADMTGFPDGLSMDMTSIPHTIFDETTLVPHNLLTVTSGKTDSVDNNMPTNNAGAGPLPTGFAIQGSQLAGSTLTEFTKRRNWSQRVIEELKDLMYILTPDGRLLYVSPSAKTLTGYDAAELVGKSISEFIHPDDSNLFIQEFNESIATGNTLRLYHRFRTAEQKYRIFECHGHPHLTHEVGQMERAGYPVSPAGICRGFFMMARPYPTRNSELLDSFLEHKIENVRLQARIAALKQEEADDMELQQEHYHKQAATASSRTPSITADMTPASPSVASKPDYIDYNGMPPPAKPTVSNIALTREALDEANAFARPDSIRDKMARYEGSSHVDSIEMMTGLRYREGERSHGISTGGTSPALIRGDAGIQIPL…	506	55.2101	5.909	62.17	-0.586	0(N)	Nucleus	2	PF08447;PF00320	PAS fold;GATA zinc finger	LYVSPSAKTLTGYDAAELVGKSISEFIHPDDSNLFIQEFNESIATGNTLRLYHRFRTAEQKYRIFECHGHPHLT;CTDCGTLDSPEWRKGPNGPKTLCNACGLRWAKREK	134;424	207;458	1.5e-10;3.9e-11	1	CTDCGTLDSPEWRKGPNGPKTLCNAC	Type IVb
405	EnsemblFungi	Ascomycota	Eurotiomycetes	Chaetothyriales	Capronia coronata CBS 617.96	Ccoro4	EXJ94525	MLTVRAMDALPRSASFGSERESLMRQPSAEDLDAARQLVSSARGERTGSHIVHDGHLSDTATDSARLNQLSPRVESHDRPRSASELPEQKEDISGLGQVCSNCGTTKTPLWRRSPAGTTICNACGLYLKTRNTPRPTNFKRPNPSTSAESPYQADRTSPAAATSPPPGQTQVPGIPYRVPEHTPGSCPGGGNCNGAGGAEGCGGCPAYNNRVARSTNASTLINSASNPPESDRQNNTGPATPSQSGPTGTPVPQPQPSTDNVSLVVACKNCGTTVTPLWRRDEHGHPICNACGLYHKLHGSHRPVQMKKSTIKRRKRVVPAYPDVSRSDGNASQKTVSASPEPVSPEQDYHDTLGDESPAPKRRRPPPTVDYTGYVPGPPAGDAPRSAQQPTEDYTVQA…	492	52.7717	8.417	52.46	-0.889	0(N)	Nucleus	2	PF00320;PF00320	GATA zinc finger;GATA zinc finger	CSNCGTTKTPLWRRSPAGTTICNACGLYLKTRNT;CKNCGTTVTPLWRRDEHGHPICNACGLYHKLHGS	100;268	133;301	4.8e-11;1.4e-11	2	CSNCGTTKTPLWRRSPAGTTICNAC;CKNCGTTVTPLWRRDEHGHPICNAC	Type IVa;Type IVa
[truncated: 7,441 more rows]

## Sheet: Supplementary Table 3
Supplementary Table 3. Detailed information on 2,835 animal GATA TFs and 5,299 plant GATA TFs
Taxonomic Information								Proteins					Domains					GATA motifs
No.	Kingdom No.	Kingdom	Group	Order	Family	Genus	Species	Protein ID	Protein Seq	Protein Len	Functional Classification	Source	# of domains	Pfam entry	Description	Position	Sequences	# of GATA motifs	Sequences	Types
[truncated: 8,134 more rows]

## Sheet: Supplementary Table 4
Supplementary Table 4. Detailed information on 25 functionally characterized fungal GATA TFs
[truncated: 26 more rows]

## Sheet: Supplementary Table 5
Supplementary Table 5. Distribution of domain occurrences of GATA TFs across major fungal lineages
[truncated: 15 more rows]

[truncated: 1 more sheets: Supplementary Table 6]
